# Supplementary material
Source: HighWire-hosted journal article supplement (doi:10.1101/rna.080163.124)
Supplement: Supplemental_Table_S1.xlsx [file Supplemental_Table_S1.xlsx]

## Sheet: legend
Supplementary table S1. List of Csps that were analyzed in this study. (A) All Csps, (B) K-A type, (C) K-E type, (D) K4 type, (E) (KA or KE) and K4 type and (F) Csps outside the identified types were listed. As exceptions, two proteins (GCF_000015725.1_WP_011830051.1 and GCF_900475885.1_WP_006995997.1) having K-Q and K-V in the loop, respectively, were not classified.

## Sheet: (A)All
Table S1A. All Csps that were obtained by PSI-BLAST
ID	Amino Acid	Nucleotide
GCF_000203835.1_WP_003978336.1	MASGTVKWFNSEKGFGFIAQDGGGPDVFAHYSNINAQGYRELQEGQAVTFDITQGQKGPQAENITPA	ATGGCCAGCGGAACTGTCAAGTGGTTCAACTCTGAAAAGGGCTTCGGCTTCATCGCGCAGGACGGCGGCGGCCCCGACGTCTTCGCGCACTACTCCAACATCAACGCCCAGGGCTACCGCGAGCTGCAGGAAGGCCAGGCCGTCACCTTCGACATCACCCAGGGCCAGAAGGGCCCGCAGGCGGAGAACATCACCCCCGCCTGA
GCF_000006965.1_WP_003537120.1	MNSGTVKWFNSTKGFGFIQPDDGATDVFVHASAVERAGMRSLVEGQKVTYDIVRDTKSGKSSADNLRAA	ATGAACTCAGGCACCGTAAAGTGGTTCAACAGCACCAAGGGCTTCGGCTTCATTCAGCCCGACGATGGCGCTACGGACGTATTCGTGCACGCCTCCGCCGTTGAACGCGCTGGAATGCGTTCGCTCGTAGAAGGCCAGAAGGTTACCTACGACATCGTCCGCGACACCAAGTCCGGCAAGAGCTCGGCAGACAATCTGCGGGCCGCATAA
GCF_000005845.2_NP_415156.1	MSKIKGNVKWFNESKGFGFITPEDGSKDVFVHFSAIQTNGFKTLAEGQRVEFEITNGAKGPSAANVIAL	ATGTCTAAGATTAAAGGTAACGTTAAGTGGTTTAATGAGTCCAAAGGATTCGGTTTCATTACTCCGGAAGACGGCAGCAAAGACGTGTTCGTACACTTCTCTGCAATCCAGACTAATGGTTTTAAAACTCTTGCTGAAGGTCAGCGCGTAGAGTTCGAAATCACTAACGGTGCCAAAGGCCCTTCTGCTGCAAACGTAATCGCTCTGTAA
GCF_000005845.2_NP_415401.1	MEKGTVKWFNNAKGFGFICPEGGGEDIFAHYSTIQMDGYRTLKAGQSVQFDVHQGPKGNHASVIVPVEVEAAVA	ATGGAAAAGGGTACTGTTAAGTGGTTCAACAATGCCAAAGGGTTTGGTTTCATCTGCCCTGAAGGCGGCGGCGAAGATATTTTCGCTCATTATTCCACCATTCAGATGGATGGTTACAGAACGCTAAAAGCTGGACAATCCGTTCAGTTTGATGTCCACCAGGGGCCAAAAGGCAATCACGCCAGTGTTATTGTGCCCGTCGAAGTAGAAGCGGCAGTCGCATAG
GCF_000005845.2_NP_415509.1	MSRKMTGIVKTFDRKSGKGFIIPSDGRKEVQVHISAFTPRDAEVLIPGLRVEFCRVNGLRGPTAANVYLS	TTGTCCCGTAAAATGACAGGAATTGTCAAAACCTTTGATCGCAAAAGCGGCAAAGGATTCATTATCCCCTCCGACGGTCGTAAAGAAGTTCAGGTCCATATTTCCGCATTCACTCCCCGCGACGCAGAAGTGCTTATACCAGGATTACGTGTGGAATTTTGCCGCGTAAATGGCCTGCGAGGACCAACAGCGGCAAATGTTTATCTCTCTTAA
GCF_000005845.2_NP_415510.1	MSNKMTGLVKWFNADKGFGFITPDDGSKDVFVHFTAIQSNEFRTLNENQKVEFSIEQGQRGPAAANVVTL	ATGTCTAATAAAATGACTGGTTTAGTAAAATGGTTTAACGCAGATAAAGGTTTTGGCTTTATCACTCCTGATGATGGCAGCAAAGACGTTTTCGTCCATTTCACCGCCATCCAGAGCAATGAATTCCGCACGCTGAACGAAAATCAGAAAGTTGAATTTTCTATTGAGCAGGGGCAACGTGGCCCCGCGGCAGCGAACGTTGTTACGCTCTAA
GCF_000005845.2_NP_416070.1	MSNKMTGLVKWFNPEKGFGFITPKDGSKDVFVHFSAIQSNDFKTLTENQEVEFGIENGPKGPAAVHVVAL	ATGTCTAACAAAATGACTGGTTTAGTGAAATGGTTTAACCCTGAAAAAGGTTTTGGTTTCATCACGCCGAAAGATGGCAGCAAAGATGTGTTTGTCCATTTCTCAGCAATTCAGAGCAACGATTTCAAAACATTAACTGAGAATCAGGAAGTTGAATTTGGTATTGAGAACGGACCTAAAGGTCCTGCCGCTGTTCATGTAGTGGCGCTTTGA
GCF_000005845.2_NP_416075.1	MSNKMTGLVKWFNADKGFGFISPVDGSKDVFVHFSAIQNDNYRTLFEGQKVTFSIESGAKGPAAANVIITD	ATGTCAAATAAAATGACTGGTTTAGTAAAATGGTTTAACGCTGATAAAGGTTTCGGCTTTATTTCTCCTGTTGATGGTAGTAAAGATGTGTTTGTGCATTTTTCTGCGATTCAGAATGATAATTATCGAACCTTATTTGAAGGTCAAAAGGTTACCTTCTCTATAGAGAGTGGTGCTAAAGGTCCTGCAGCAGCAAATGTCATCATTACTGATTAA
GCF_000005845.2_NP_416076.1	MSRKMTGIVKTFDGKSGKGLITPSDGRIDVQLHVSALNLRDAEEITTGLRVEFCRINGLRGPSAANVYLS	TTGTCCCGTAAAATGACAGGAATTGTCAAAACCTTTGACGGCAAAAGCGGCAAGGGTCTTATCACCCCATCCGATGGTCGTATCGATGTCCAGCTTCATGTTTCAGCGCTCAATCTCCGCGATGCAGAAGAAATTACCACCGGATTACGCGTGGAATTTTGCCGGATAAATGGTCTGCGTGGCCCTTCAGCTGCCAATGTTTACCTTTCATGA
GCF_000005845.2_NP_416337.1	MAKIKGQVKWFNESKGFGFITPADGSKDVFVHFSAIQGNGFKTLAEGQNVEFEIQDGQKGPAAVNVTAI	ATGGCAAAGATTAAAGGTCAGGTTAAGTGGTTCAACGAGTCTAAAGGTTTTGGCTTCATTACTCCGGCTGATGGCAGCAAAGATGTGTTCGTACACTTCTCCGCTATCCAGGGTAATGGCTTCAAAACTCTGGCTGAAGGTCAGAACGTTGAGTTCGAAATTCAGGACGGCCAGAAAGGTCCGGCAGCTGTTAACGTAACAGCTATCTGA
GCF_000005845.2_NP_418012.1	MSGKMTGIVKWFNADKGFGFITPDDGSKDVFVHFSAIQNDGYKSLDEGQKVSFTIESGAKGPAAGNVTSL	ATGTCCGGTAAAATGACTGGTATCGTAAAATGGTTCAACGCTGACAAAGGCTTCGGCTTCATCACTCCTGACGATGGCTCTAAAGATGTGTTCGTACACTTCTCTGCTATCCAGAACGATGGTTACAAATCTCTGGACGAAGGTCAGAAAGTGTCCTTCACCATCGAAAGCGGCGCTAAAGGCCCGGCAGCTGGTAACGTAACCAGCCTGTAA
GCF_000006765.1_NP_251312.1	MLSGKVKWFNNAKGYGFILAEGRDEDLFAHYSAIQMDGYKTLKAGQPVNFEIIQGPKGLHAINISPATATTAAPSAPAPQEEPQATPIEA	ATGCTCAGCGGTAAGGTCAAGTGGTTCAACAACGCCAAGGGCTACGGGTTCATCCTGGCCGAGGGCCGAGATGAGGACCTGTTCGCCCATTACTCGGCCATTCAGATGGACGGTTACAAGACACTCAAGGCGGGCCAGCCGGTCAATTTCGAGATCATCCAGGGACCGAAGGGACTGCATGCCATCAACATCAGCCCCGCCACCGCGACAACCGCCGCACCCTCCGCCCCCGCCCCGCAGGAAGAGCCGCAGGCGACGCCCATCGAAGCCTGA
GCF_000006825.1_WP_005753860.1	MEVGVVKWFNNAKGFGFISAEGTDADIFAHYSVIEMEGYRSLKAGQKVQFEVVHGDKGSHATKIIPIVE	ATGGAAGTTGGTGTAGTTAAATGGTTCAATAACGCGAAAGGATTTGGATTCATTTCTGCAGAAGGAACAGACGCAGATATTTTTGCGCATTACTCAGTCATCGAAATGGAAGGCTACCGTTCATTAAAAGCGGGTCAAAAAGTGCAATTTGAAGTCGTACATGGCGATAAAGGATCACATGCGACGAAAATTATTCCAATCGTTGAATAA
GCF_000006925.2_NP_706586.2	MSKIKGNVKWFNESKGFGFITPEDGSKDVFVHFSAIQTNGFKTLAEGQRVEFEITNGAKGPSAANVIAL	ATGTCTAAGATTAAAGGTAACGTTAAGTGGTTTAATGAGTCCAAAGGATTCGGTTTCATTACTCCGGAAGACGGCAGCAAAGACGTGTTCGTACACTTCTCTGCAATCCAGACTAATGGTTTTAAAACTCTTGCTGAAGGTCAGCGCGTAGAGTTCGAAATCACTAACGGTGCCAAAGGCCCTTCTGCTGCAAACGTAATCGCTCTGTAA
GCF_000006925.2_NP_706766.1	MEKGTVKWFNNAKGFGFICPEGGGEDIFAHYSTIQMDGYRTLKAGQSVQFDVHQGPKGNHASVIVPVEVEAAVA	ATGGAAAAGGGTACTGTTAAGTGGTTCAACAATGCCAAAGGGTTTGGTTTCATCTGCCCTGAAGGCGGCGGCGAAGATATTTTCGCTCATTATTCCACCATTCAGATGGATGGTTACAGAACGCTAAAAGCTGGACAATCCGTTCAGTTTGATGTCCACCAGGGGCCAAAAGGCAATCACGCCAGTGTTATTGTGCCCGTCGAAGTAGAAGCGGCAGTCGCATAG
GCF_000006925.2_NP_706911.1	MSRKMTGIVKTFDRKSGKGFIIPSDGRKEVQVHISAFTPRDAEVLIPGLRVEFCRVNGLRGPTAANVYLS	TTGTCCCGTAAAATGACAGGAATTGTCAAAACCTTTGATCGCAAAAGCGGCAAAGGATTCATTATCCCCTCCGACGGTCGTAAAGAAGTCCAGGTCCATATTTCCGCATTCACTCCCCGCGACGCAGAAGTGCTTATACCAGGATTACGCGTGGAATTTTGCCGCGTAAATGGCCTGCGAGGACCAACAGCGGCAAATGTTTATCTCTCTTAA
GCF_000006925.2_NP_706912.2	MTGLVKWFNADKGFGFITPDDGSKDVFVHFTAIQSNEFRTLNENQKVEFSIEQGQRGPAAANVVTL	ATGACTGGTTTAGTAAAATGGTTTAACGCAGATAAAGGTTTTGGCTTTATCACTCCTGATGATGGCAGCAAAGACGTTTTCGTCCATTTCACCGCCATCCAGAGCAATGAATTCCGCACGCTGAACGAAAATCAGAAAGTTGAATTTTCTATTGAGCAGGGGCAACGTGGCCCCGCGGCAGCGAACGTTGTTACGCTCTAA
GCF_000006925.2_NP_707297.1	MAKIKGQVKWFNESKGFGFITPADGSKDVFVHFSAIQGNGLKTLAEGQNVEFEIQDGQKGPAAVNVTAI	ATGGCAAAGATTAAAGGTCAGGTTAAGTGGTTCAACGAGTCTAAAGGTTTTGGCTTCATTACTCCGGCTGATGGCAGCAAAGATGTGTTCGTACACTTCTCCGCTATCCAGGGTAATGGCTTGAAAACTCTGGCTGAAGGTCAGAACGTTGAGTTCGAAATTCAGGACGGCCAGAAAGGTCCGGCAGCTGTTAACGTAACAGCTATCTGA
GCF_000006925.2_NP_709333.1	MSGKMTGIVKWFNADKGFGFITPDDGSKDVFVHFSAIQNDGYKSLDEGQKVSFTIESGAKGPAAGNVTSL	ATGTCCGGTAAAATGACTGGTATCGTAAAATGGTTCAACGCTGACAAAGGCTTCGGCTTCATCACTCCTGACGATGGCTCTAAAGATGTGTTCGTACACTTCTCTGCTATCCAGAACGATGGTTACAAATCTCTGGACGAAGGTCAGAAAGTGTCCTTCACCATCGAAAGCGGCGCTAAAGGCCCGGCAGCTGGTAACGTAACCAGCCTGTAA
GCF_000006945.2_NP_459621.1	MSKIKGNVKWFNESKGFGFITPEDGSKDVFVHFSAIQTNGFKTLAEGQRVEFEITNGAKGPSAANVTAL	ATGTCTAAGATTAAAGGTAACGTTAAGTGGTTTAATGAATCCAAAGGATTCGGTTTCATTACTCCGGAAGATGGCAGCAAAGACGTGTTTGTACACTTCTCTGCAATCCAGACCAATGGTTTTAAAACTCTGGCTGAAGGTCAGCGCGTAGAGTTCGAAATCACTAACGGTGCCAAAGGCCCTTCCGCTGCAAACGTAACTGCTCTGTAA
GCF_000006945.2_NP_459920.1	METGTVKWFNNAKGFGFICPEGGGEDIFAHYSTIQMDGYRTLKAGQSVRFDVHQGPKGNHASVIVPIEAEAVA	ATGGAAACGGGTACTGTAAAGTGGTTCAACAATGCCAAAGGGTTTGGTTTCATCTGCCCTGAAGGCGGCGGCGAGGATATTTTCGCCCATTATTCCACCATTCAAATGGATGGTTACAGAACGCTTAAAGCCGGACAGTCTGTCCGGTTTGATGTCCACCAGGGGCCAAAAGGCAATCACGCCAGCGTCATCGTGCCCATCGAAGCAGAGGCCGTTGCATAG
GCF_000006945.2_NP_460213.1	MSRKMTGIVKTFDCKSGKGLITPSDGRKDVQVHISACRQHETEALIPGIRVEFCRINGLRGPTAANVYLS	TTGTCTCGTAAAATGACAGGAATTGTCAAAACCTTTGATTGTAAGAGCGGTAAAGGTCTCATCACCCCCTCCGATGGACGCAAAGATGTTCAGGTCCACATTTCAGCATGTCGCCAACACGAAACAGAAGCGCTTATCCCCGGTATACGCGTTGAGTTTTGTCGTATTAATGGCCTCCGCGGACCTACCGCCGCCAACGTTTATCTTTCATAA
GCF_000006945.2_NP_460793.1	MAKIKGQVKWFNESKGFGFITPADGSKDVFVHFSAIQGNGFKTLAEGQNVEFEIQDGQKGPAAVNVTAI	ATGGCAAAGATTAAAGGTCAAGTTAAGTGGTTCAACGAATCCAAAGGTTTTGGCTTCATTACTCCGGCTGACGGCAGCAAAGATGTGTTCGTACACTTCTCCGCTATCCAGGGCAATGGTTTCAAAACTCTGGCTGAAGGCCAGAACGTTGAGTTCGAAATTCAGGACGGCCAGAAAGGTCCGGCTGCTGTTAACGTAACAGCTATCTGA
GCF_000006945.2_NP_460947.1	MTTKITGLVKWFNPEKGFGFITPKDGSKDVFVHFSAIQSNEFRTLNENQEVEFSVEQGPKGPSAVNVVAL	ATGACGACGAAAATCACTGGTTTAGTAAAATGGTTTAACCCTGAAAAGGGCTTTGGTTTCATTACGCCTAAAGATGGCAGCAAAGATGTGTTTGTGCATTTTTCAGCCATTCAAAGTAATGAATTCCGCACTCTGAATGAAAATCAGGAAGTGGAGTTTTCAGTAGAGCAGGGACCAAAAGGTCCATCAGCGGTCAACGTTGTGGCGCTTTAA
GCF_000006945.2_NP_462550.1	MSGKMTGIVKWFNADKGFGFITPDDGSKDVFVHFSAIQNDGYKSLDEGQKVSFTIESGAKGPAAGNVTSL	ATGTCCGGTAAAATGACTGGTATCGTAAAATGGTTCAACGCTGATAAAGGCTTCGGCTTTATTACTCCTGATGACGGTTCTAAAGACGTGTTCGTACACTTCTCCGCTATTCAGAACGATGGTTACAAATCTCTGGACGAAGGTCAGAAAGTTTCCTTCACCATCGAAAGCGGCGCTAAGGGCCCGGCAGCTGGCAACGTAACCAGCCTGTAA
GCF_000007745.1_WP_011200270.1	MEVGVVKWFNNAKGFGFINAEGSDADIFAHYSVIEMDGYRSLKAGQKVNFEVVHGEKGSHATKIIPILE	ATGGAAGTTGGTGTTGTAAAATGGTTCAATAATGCTAAGGGATTTGGATTCATTAATGCGGAAGGAAGTGATGCGGATATTTTTGCACACTATTCAGTCATCGAAATGGATGGTTACCGTTCATTAAAAGCCGGACAAAAAGTGAATTTTGAAGTTGTACATGGTGAAAAAGGCTCACACGCAACTAAAATTATTCCTATTTTAGAATAA
GCF_000008445.1_WP_000176368.1	MTLTGKVKWFNSEKGFGFIEVEGGNDVFVHFSAITGDGFKSLDEGQEVSFEVEDGNRGPQAKNVVKL	ATGACATTAACAGGTAAAGTAAAATGGTTTAACAGCGAAAAAGGTTTCGGTTTCATCGAAGTTGAAGGCGGTAACGACGTATTCGTTCACTTCTCAGCTATCACTGGCGACGGTTTCAAATCTCTTGACGAAGGTCAAGAAGTTAGCTTCGAAGTTGAAGACGGTAACCGTGGACCTCAAGCTAAAAACGTTGTAAAGCTATAA
GCF_000008445.1_WP_001161732.1	MQGKVKWFNNEKGFGFIEMEGADDVFVHFSAIQGEGYKALEEGQEVSFDITEGNRGPQAANVVKL	ATGCAAGGAAAAGTAAAATGGTTTAACAACGAAAAAGGTTTTGGATTTATCGAAATGGAAGGCGCTGACGATGTATTCGTACATTTCTCTGCGATTCAAGGCGAAGGCTACAAAGCTTTAGAAGAAGGTCAAGAAGTATCTTTCGATATCACTGAAGGAAACCGCGGACCTCAAGCTGCTAACGTAGTAAAACTTTAA
GCF_000008445.1_WP_001179150.1	MQNGKVKWFNSEKGFGFIEVEGGEDVFVHFSAIQGEGFKTLEEGQEVTFEVEQGNRGPQATNVNKK	ATGCAAAACGGTAAAGTAAAATGGTTTAACTCAGAAAAAGGTTTCGGATTCATCGAAGTTGAAGGCGGAGAAGACGTATTCGTTCATTTCTCAGCTATCCAAGGCGAAGGTTTCAAAACTTTAGAAGAAGGTCAAGAAGTTACTTTCGAAGTAGAACAAGGTAACCGTGGACCTCAAGCTACAAACGTTAACAAGAAGTAA
GCF_000008445.1_WP_001193054.1	MQTGKVKWFNSEKGFGFIEVEGGDDVFVHFSAIQGDGFKTLEEGQEVSFEIVEGNRGPQAANVTKN	ATGCAAACAGGTAAAGTTAAATGGTTTAACAGCGAAAAAGGTTTCGGTTTCATCGAAGTTGAAGGTGGAGACGATGTATTCGTTCACTTCTCAGCTATCCAAGGTGACGGATTCAAAACTTTAGAAGAAGGTCAAGAAGTTTCTTTCGAAATCGTTGAAGGTAACCGTGGACCACAAGCTGCTAACGTTACAAAAAACTAA
GCF_000008445.1_WP_001990088.1	MQGRVKWFNAEKGFGFIEREDGDDVFVHFSAIQQDGYKSLEEGQQVEFDIVDGARGPQAANVVKL	ATGCAAGGAAGAGTGAAATGGTTTAATGCAGAAAAGGGATTTGGGTTTATTGAGCGTGAAGATGGTGATGATGTGTTTGTTCATTTTTCTGCTATTCAACAAGATGGATATAAGTCATTAGAAGAAGGGCAACAAGTTGAGTTTGATATTGTAGATGGAGCACGTGGACCACAAGCAGCTAATGTTGTAAAACTGTAG
GCF_000008465.1_WP_011233928.1	MATGKVKWFNNSKGFGFIESEDREGDIFAHYSTIEMEGYRTLKAGQPVEFELEEGPKGLHANNIVPGAADK	ATGGCTACCGGAAAAGTCAAATGGTTCAATAATTCGAAGGGCTTCGGCTTTATCGAAAGCGAGGACCGCGAAGGTGATATTTTCGCTCACTATTCAACCATTGAAATGGAAGGCTATCGCACACTTAAAGCGGGGCAACCCGTAGAGTTTGAACTCGAAGAAGGCCCCAAAGGCTTGCATGCCAACAACATTGTTCCCGGCGCTGCCGATAAATAA
GCF_000008865.2_NP_308689.1	MSKIKGNVKWFNESKGFGFITPEDGSKDVFVHFSAIQTNGFKTLAEGQRVEFEITNGAKGPSAANVIAL	ATGTCTAAGATTAAAGGTAACGTTAAGTGGTTTAATGAGTCCAAAGGATTCGGTTTCATTACTCCGGAAGACGGCAGCAAAGACGTGTTCGTACACTTCTCTGCAATCCAGACTAATGGTTTTAAAACTCTTGCTGAAGGTCAGCGCGTAGAGTTCGAAATCACTAACGGTGCCAAAGGCCCTTCTGCTGCAAACGTAATCGCTCTGTAA
GCF_000008865.2_NP_308993.1	MEKGTVKWFNNAKGFGFICPEGGGEDIFAHYSTIQMDGYRTLKAGQSVQFDVHQGPKGNHASVIVPVEVEAAVA	ATGGAAAAGGGTACTGTTAAGTGGTTCAACAATGCCAAAGGGTTTGGTTTCATCTGCCCTGAAGGCGGCGGCGAAGATATTTTCGCTCATTATTCCACCATTCAGATGGATGGTTACAGAACGCTAAAAGCTGGACAATCCGTTCAGTTTGATGTCCACCAGGGGCCAAAAGGCAATCACGCCAGTGTTATTGTGCCCGTCGAAGTAGAAGCGGCAGTCGCATAG
GCF_000008865.2_NP_309172.1	MSNKMTGLVKWFNADKGFGFITPDDGSKDVFVHFTAIQSNEFRTLNENQKVEFSIEQGQRGPAAANVVTL	ATGTCTAATAAAATGACTGGTTTAGTAAAATGGTTTAACGCAGATAAAGGTTTTGGCTTTATCACTCCTGATGATGGCAGCAAAGACGTTTTCGTCCATTTCACCGCCATCCAGAGCAATGAATTCCGCACGCTGAACGAAAATCAGAAAGTTGAATTTTCTATTGAGCAGGGTCAACGTGGCCCCGCGGCAGCGAACGTAGTTACGCTCTAA
GCF_000008865.2_NP_310560.1	MAKIKGQVKWFNESKGFGFITPADGSKDVFVHFSAIQGNGFKTLAEGQNVEFEIQDGQKGPAAVNVTAI	ATGGCAAAGATTAAAGGTCAGGTTAAGTGGTTCAACGAGTCTAAAGGTTTTGGCTTCATTACTCCTGCTGATGGCAGCAAAGACGTGTTCGTACACTTCTCCGCTATCCAGGGTAATGGCTTCAAAACTCTGGCTGAAGGTCAGAACGTTGAGTTCGAAATTCAGGACGGCCAGAAAGGTCCGGCAGCTGTTAACGTAACAGCTATCTGA
GCF_000008865.2_NP_312468.1	MSGKMTGIVKWFNADKGFGFITPDDGSKDVFVHFSAIQNDGYKSLDEGQKVSFTIESGAKGPAAGNVTSL	ATGTCCGGTAAAATGACTGGTATCGTAAAATGGTTCAACGCTGACAAAGGCTTCGGCTTCATCACTCCTGACGATGGCTCTAAAGACGTGTTCGTACACTTCTCTGCTATCCAGAACGATGGTTACAAATCTCTGGACGAAGGTCAGAAAGTGTCCTTCACCATCGAAAGCGGCGCTAAAGGCCCGGCAGCTGGCAACGTAACCAGCCTGTAA
GCF_000009045.1_NP_388791.1	MLEGKVKWFNSEKGFGFIEVEGQDDVFVHFSAIQGEGFKTLEEGQAVSFEIVEGNRGPQAANVTKEA	ATGTTAGAAGGTAAAGTAAAATGGTTCAACTCTGAAAAAGGTTTCGGATTCATCGAAGTAGAAGGTCAAGACGATGTATTCGTTCATTTCTCTGCTATTCAAGGCGAAGGCTTCAAAACTTTAGAAGAAGGCCAAGCTGTTTCTTTTGAAATCGTTGAAGGAAACCGCGGACCACAAGCTGCTAACGTTACTAAAGAAGCGTAA
GCF_000009045.1_NP_390076.1	MQNGKVKWFNNEKGFGFIEVEGGDDVFVHFTAIEGDGYKSLEEGQEVSFEIVEGNRGPQASNVVKL	ATGCAAAACGGTAAAGTAAAATGGTTCAACAACGAAAAAGGATTCGGCTTCATTGAAGTTGAAGGCGGAGACGATGTATTTGTTCACTTCACAGCTATCGAAGGAGATGGATACAAATCATTAGAAGAAGGACAAGAAGTTTCTTTTGAAATTGTCGAAGGTAATCGTGGACCTCAAGCTTCTAATGTTGTAAAACTCTAA
GCF_000009145.1_WP_011112285.1	MATGTVKWFNDSKGFGFITPDDGSEDLFAHFSAINMTGFKTLKEGQKVSFEVTQGPKGKQASNIQSA	ATGGCAACAGGTACAGTAAAGTGGTTCAATGATTCAAAAGGATTTGGTTTTATTACACCGGACGACGGCAGCGAAGATTTGTTCGCACACTTTTCCGCGATCAATATGACAGGTTTCAAGACCCTGAAAGAAGGCCAGAAAGTAAGTTTTGAAGTTACGCAAGGACCAAAAGGCAAACAGGCTTCAAATATCCAGTCTGCTTGA
GCF_000009785.1_WP_003251474.1	MQRGKVKWFNNEKGYGFIEVEGGSDVFVHFTAIQGEGFKTLEEGQEVSFEIVQGNRGPQAANVVKL	ATGCAACGTGGTAAAGTAAAATGGTTTAACAACGAAAAAGGCTACGGTTTCATCGAAGTGGAAGGCGGTTCCGACGTATTCGTCCACTTCACGGCGATCCAAGGTGAAGGGTTCAAAACGTTAGAAGAAGGCCAAGAAGTTTCGTTTGAAATCGTCCAAGGAAACCGCGGACCGCAAGCAGCGAACGTTGTCAAATTATAA
GCF_000010085.1_WP_005968829.1	MAKIKGQVKWFNESKGFGFITPADGSKDVFVHFSAIQGNGFKTLAEGQNVEFEIQDGQKGPSAVNVTAL	ATGGCAAAGATTAAAGGTCAAGTGAAGTGGTTCAATGAGTCTAAAGGTTTTGGTTTCATCACTCCGGCCGATGGCAGCAAAGACGTGTTTGTTCACTTCTCCGCTATTCAGGGTAACGGTTTCAAAACCCTGGCTGAAGGCCAGAACGTTGAATTCGAAATCCAGGATGGCCAGAAAGGCCCTTCAGCAGTTAACGTAACTGCCCTGTAA
GCF_000010085.1_WP_011410009.1	MSNKVTGLVKWFDAGKGFGFITPADGSKDVFVHFSAIQSNDFKTLDEGQRVEFTIEQGQKGPSAANVVAL	ATGTCTAATAAAGTAACTGGTTTAGTAAAATGGTTTGACGCGGGTAAAGGTTTTGGTTTCATCACTCCGGCTGACGGCAGCAAAGATGTGTTTGTACATTTTTCCGCCATCCAGAGCAACGATTTTAAAACCCTGGACGAAGGTCAGCGCGTAGAGTTCACCATTGAGCAGGGTCAGAAAGGCCCGTCTGCTGCTAACGTGGTTGCCCTGTAA
GCF_000010085.1_WP_011410735.1	METGKVKWFNNAKGFGFICPENGGEDIFAHYSMIHMDGYRTLKAGQVVRFEVHQGPKGNHASLIVPVEAETVA	ATGGAGACGGGTAAAGTTAAATGGTTCAATAACGCCAAAGGTTTTGGTTTTATCTGCCCGGAAAACGGCGGCGAGGATATCTTTGCGCACTATTCAATGATCCATATGGACGGTTACCGGACGCTGAAGGCCGGGCAAGTCGTCAGATTCGAGGTTCATCAGGGGCCCAAAGGGAACCATGCGAGCCTGATTGTGCCTGTTGAAGCCGAGACTGTTGCCTAA
GCF_000011145.1_WP_010899738.1	MQGKVKWFNAEKGFGFIEREDGDDVFVHFSAINTDGFKTLDEGQSVEFDIVEGARGPQAANVTKL	ATGCAAGGAAAAGTAAAATGGTTTAACGCAGAAAAAGGTTTCGGTTTTATCGAGCGCGAAGATGGTGACGATGTATTTGTTCATTTCTCTGCCATTAACACAGACGGTTTCAAAACATTAGACGAAGGTCAATCTGTTGAGTTTGATATCGTTGAAGGAGCTCGCGGACCTCAAGCTGCGAACGTCACTAAGCTTTAA
GCF_000011245.1_WP_011064983.1	MTGKVKWFNAEKGFGFIEREDGDDVFVHFSAIQADGFKTLEEGQDVEFEIVEGNRGPQAANVVRL	ATGACTGGTAAAGTAAAATGGTTTAATGCAGAAAAAGGTTTTGGTTTCATCGAGCGTGAAGATGGAGACGATGTATTCGTACATTTCTCAGCTATCCAAGCTGATGGTTTCAAAACACTTGAAGAAGGTCAAGACGTTGAATTTGAAATCGTTGAAGGTAACCGTGGCCCACAAGCGGCTAACGTAGTTCGTTTATAA
GCF_000011245.1_WP_011065421.1	MNTGSVKWFNAEKGFGFIEVEGGDDVFVHFSAIQGEGFKTLEEGQSVSFDIEEGNRGPQAANVVKN	ATGAACACAGGTTCAGTAAAATGGTTTAACGCAGAAAAAGGCTTCGGTTTCATCGAAGTTGAAGGTGGAGACGATGTATTCGTACACTTCTCAGCAATCCAAGGCGAAGGTTTCAAAACATTAGAAGAAGGTCAATCAGTTTCTTTCGATATCGAAGAAGGTAACCGTGGACCTCAAGCAGCTAACGTTGTTAAAAACTAA
GCF_000011745.1_WP_011282991.1	MAKIKGQVKWFNESKGFGFITPSDGSKDVFVHFSAIQGNGFKTLSEGQSVEFEIQDGHKGPSAVNVTAL	ATGGCAAAAATTAAAGGTCAAGTAAAATGGTTTAATGAATCTAAAGGTTTTGGTTTTATTACACCGTCAGATGGGAGCAAAGATGTATTTGTACATTTTTCTGCCATTCAAGGAAATGGATTTAAGACTTTGTCTGAAGGTCAAAGCGTAGAATTTGAAATTCAAGATGGACACAAAGGCCCATCTGCTGTAAACGTGACGGCTTTATGA
GCF_000012325.1_WP_011043688.1	MAHGTVKWFNNAKGFGFIRPDSGGEDIFAHYSTIEMDGYRTLKAGQDVDYELNDGPKGHHAASIKLADGELE	ATGGCACACGGTACAGTTAAATGGTTTAATAATGCGAAAGGTTTTGGCTTTATTCGCCCGGATAGTGGCGGAGAAGATATTTTCGCACACTATTCAACTATTGAGATGGATGGATATCGAACATTAAAAGCAGGACAGGATGTCGATTACGAACTAAATGATGGCCCTAAAGGTCATCATGCAGCAAGTATCAAATTAGCTGATGGCGAACTAGAATAA
GCF_000012945.1_WP_006477070.1	MATGTVKWFNDAKGFGFITPEGGGDDLFAHFSEIRVEGFKTLQENQKVEFEVKTGPKGLQAANIRPV	ATGGCAACCGGTACCGTCAAGTGGTTCAATGACGCAAAGGGCTTCGGCTTCATCACCCCGGAAGGCGGCGGCGACGATCTGTTCGCGCACTTCTCGGAAATCCGCGTCGAAGGCTTCAAGACGCTGCAAGAAAACCAGAAGGTTGAATTCGAAGTGAAGACGGGCCCGAAGGGTCTGCAAGCTGCGAACATCCGTCCGGTCTAA
GCF_000012945.1_WP_006478030.1	MATGIVKWFNDAKGFGFITPDEGGEDLFAHFSAITMNGFKTLKEGQKVSFDVVQGPKGKQASNIQAA	ATGGCAACTGGTATCGTTAAGTGGTTCAACGACGCGAAGGGCTTCGGTTTCATCACTCCCGACGAGGGCGGTGAGGATCTGTTTGCGCACTTCTCGGCTATCACCATGAATGGCTTCAAGACGCTGAAGGAAGGCCAGAAGGTGAGCTTTGACGTCGTTCAAGGACCGAAGGGCAAGCAAGCGTCGAACATCCAGGCCGCATAA
GCF_000013425.1_YP_499930.1	MKQGTVKWFNAEKGFGFIEVEGENDVFVHFSAINQDGYKSLEEGQAVEFEVVEGDRGPQAANVVKL	ATGAAACAAGGTACAGTTAAATGGTTTAACGCTGAAAAAGGATTCGGCTTTATCGAAGTTGAAGGAGAAAATGACGTATTCGTACATTTTTCAGCAATTAACCAAGATGGTTACAAATCATTAGAAGAAGGTCAAGCTGTTGAGTTTGAAGTAGTTGAAGGCGACCGCGGTCCACAAGCTGCAAACGTTGTTAAACTATAA
GCF_000013645.1_WP_007180251.1	METGTVKWFNDAKGFGFITPDGGGEDLFAHFSEIRTEGFKTLQENQKVTFEVKTGPKGKQAANIKPV	ATGGAAACCGGTACCGTCAAATGGTTCAATGACGCAAAGGGCTTTGGCTTCATCACGCCGGACGGCGGCGGCGAAGATCTGTTCGCGCATTTCTCGGAAATCCGCACGGAAGGCTTCAAGACGCTGCAAGAAAACCAAAAGGTTACGTTTGAAGTGAAGACGGGCCCGAAGGGCAAGCAAGCTGCTAACATCAAGCCGGTGTAA
GCF_000013645.1_WP_007180614.1	MATGTVKWFNDAKGFGFITPDEGGEDLFAHFSAIQMNGFKTLKEGQKVTFEVVQGPKGKQASNIQAPA	ATGGCAACTGGTACGGTCAAATGGTTCAATGACGCAAAAGGTTTCGGATTCATCACGCCTGACGAAGGTGGCGAGGATCTGTTTGCACACTTCTCGGCCATCCAGATGAATGGGTTCAAGACCCTCAAGGAAGGCCAAAAGGTAACCTTCGAGGTCGTGCAAGGCCCGAAAGGCAAACAGGCATCGAACATTCAGGCGCCCGCCTGA
GCF_000013665.1_WP_011468165.1	MPTGTVKWFNNAKGFGFILPDAGGEDLFAHYSSIEMEGYRTLKAGQPVTFEIEKGDKGLHAKNIQCTDLPETSEQQPTVEQSIAETEPG	ATGCCTACCGGAACCGTCAAATGGTTTAACAATGCTAAGGGCTTTGGGTTTATTCTACCTGACGCCGGCGGAGAAGACCTCTTCGCACACTACTCTTCCATCGAAATGGAAGGTTATCGTACGCTAAAAGCTGGCCAACCCGTTACCTTTGAGATCGAAAAAGGTGATAAAGGTTTGCACGCTAAAAACATTCAATGCACAGACTTACCCGAAACCAGTGAGCAGCAACCTACTGTAGAGCAATCTATAGCAGAAACCGAACCCGGTTAA
GCF_000013765.1_WP_011495379.1	MSNKTTGLVKWFNEDKGFGFITPDNGGADVFVHFRSITSEGFKTLAEGQKVSFEVEQGQKGPQAANVSAI	ATGTCTAACAAAACAACTGGTCTAGTAAAATGGTTTAACGAAGATAAAGGTTTCGGATTCATCACTCCAGACAATGGCGGCGCTGACGTATTCGTACATTTCCGTTCAATCACTTCAGAAGGTTTCAAAACTTTAGCTGAAGGTCAAAAAGTTTCTTTCGAAGTAGAGCAGGGCCAAAAAGGTCCTCAAGCAGCTAACGTTTCTGCTATCTAA
GCF_000013765.1_WP_011496273.1	MANGTVKWFNNAKGFGFICPDQGGDDVFAHYSTIEMEGYRTLKAGQPVQFEVEQGPKGMHASAISAK	ATGGCAAACGGAACGGTGAAATGGTTCAATAACGCCAAAGGATTCGGGTTTATCTGCCCAGATCAAGGTGGCGATGATGTATTTGCGCACTACTCAACAATTGAAATGGAAGGCTATAGAACTCTAAAAGCAGGCCAACCGGTTCAATTTGAAGTAGAGCAAGGCCCCAAAGGAATGCACGCCTCAGCCATTTCAGCTAAATAA
GCF_000014505.1_WP_002833310.1	MEQGTVKWFNADKGFGFITREDGSDVFVHFSAIQGDGFKTLEEGQAVSFDVEESDRGPQAVNVNKN	ATGGAACAAGGTACAGTTAAATGGTTTAACGCTGATAAAGGTTTTGGTTTTATTACTCGCGAAGATGGTAGTGACGTATTCGTTCACTTCTCAGCTATCCAAGGTGACGGATTCAAGACTCTTGAAGAAGGCCAAGCAGTTTCTTTCGACGTTGAAGAAAGCGACCGTGGACCACAAGCAGTTAACGTAAACAAAAACTAA
GCF_000014705.1_WP_011636218.1	MSNKTTGLVKWFNEDKGFGFITPDNGGADVFVHFRSITSEGFKTLAEGQKVSFDVEQGQKGPQAANVVAV	ATGTCTAACAAAACAACTGGTTTAGTAAAATGGTTTAACGAAGATAAAGGTTTTGGTTTTATCACTCCTGATAACGGCGGCGCTGACGTGTTCGTTCATTTCCGTTCAATCACTTCAGAGGGTTTCAAGACTCTTGCTGAAGGCCAGAAAGTTTCTTTTGATGTTGAGCAAGGCCAAAAAGGCCCACAAGCTGCTAACGTAGTAGCTGTGTAA
GCF_000014705.1_WP_011637711.1	MANGTVKWFNNAKGFGFICPDQGGEDVFAHYSTIEMEGYRTLKAGQPVCFEVEEGPKGMHASAISPTI	ATGGCAAACGGAACTGTTAAATGGTTCAACAACGCCAAAGGATTCGGGTTTATTTGCCCTGATCAGGGTGGCGAAGATGTATTTGCGCACTATTCAACTATCGAAATGGAAGGTTATCGTACCTTAAAAGCAGGTCAACCTGTGTGCTTCGAAGTTGAAGAAGGCCCTAAAGGAATGCATGCTTCAGCCATCTCGCCAACAATTTAA
GCF_000014765.1_WP_011635066.1	MATGTVKWFNDSKGFGFITPDDGSEDLFAHFSAINMSGFKTLKEGQKVSFEVTQGPKGKQASNIQAP	ATGGCAACAGGCACAGTAAAATGGTTTAATGATTCTAAAGGATTTGGTTTTATTACACCGGATGACGGCAGCGAGGATTTATTCGCGCATTTTTCCGCAATCAATATGTCAGGCTTCAAGACCCTGAAGGAAGGCCAAAAAGTAAGCTTTGAAGTTACGCAAGGACCAAAAGGCAAGCAAGCTTCAAATATTCAAGCTCCCTGA
GCF_000014885.1_WP_012155761.1	MASGTVKWFNNAKGFGFICPDAGGEDVFAHYSTIEMEGYRTLKAGQPVSFEVEAGPKGMHASAISPTN	ATGGCAAGCGGAACTGTTAAATGGTTCAACAACGCCAAAGGATTCGGGTTTATTTGCCCTGATGCTGGCGGTGAAGACGTTTTTGCGCACTATTCTACCATCGAAATGGAAGGCTATCGAACTCTAAAAGCGGGTCAACCCGTCAGTTTCGAAGTAGAAGCAGGTCCAAAAGGTATGCACGCGTCAGCAATATCACCCACTAACTAG
GCF_000014885.1_WP_020911253.1	MSNSTTGIVKWFNEDKGFGFITQDNGGADVFVHFRAIASDGFKTLAEGQKVSFDLEQGQKGPQAANVVAI	ATGTCTAATTCAACTACTGGTATCGTAAAATGGTTTAACGAAGACAAAGGTTTTGGCTTCATCACTCAAGACAATGGCGGCGCTGACGTATTCGTACATTTCCGTGCAATCGCTTCAGACGGTTTCAAAACTCTTGCTGAAGGCCAAAAAGTTTCTTTCGACCTAGAGCAAGGCCAAAAAGGCCCACAAGCAGCTAACGTAGTTGCTATCTAA
GCF_000015245.1_WP_011760171.1	MASGTVKWFNNAKGFGFICPDEGGEDVFAHYSTIEMEGYRTLKAGQPVQFEVEQGPKGMHASAITPAR	ATGGCAAGCGGGACTGTTAAATGGTTCAACAACGCCAAAGGATTCGGGTTTATTTGCCCTGATGAAGGTGGTGAAGATGTATTTGCCCATTATTCAACTATCGAAATGGAAGGCTATCGAACTCTAAAAGCAGGCCAACCAGTCCAGTTCGAAGTTGAGCAAGGTCCAAAGGGGATGCACGCTTCAGCAATCACACCTGCTCGATGA
GCF_000015245.1_WP_011761070.1	MSIKTTGSVKWFNETKGFGFITPDNGGADVFVHFRAIAVDGFKTLAEGQQVQFNVEQGNKGPQAANVTLL	ATGTCTATTAAAACTACTGGTTCAGTAAAATGGTTCAACGAAACAAAAGGCTTTGGCTTTATCACCCCTGATAACGGTGGCGCCGATGTATTTGTTCACTTCAGAGCCATTGCCGTTGACGGCTTCAAGACCCTGGCCGAAGGCCAACAGGTTCAGTTTAACGTAGAGCAGGGCAACAAAGGCCCACAAGCTGCAAACGTTACCCTGCTGTAA
GCF_000015285.1_WP_011770965.1	MSNSTTGLVKWFDEAKGFGFLTQDNGGADVFCHFRAIASEGFKTLAEGQKVSFEVEQGQKGLQAGNVIAL	ATGTCTAATTCAACTACCGGTTTAGTAAAATGGTTTGACGAAGCAAAAGGTTTCGGTTTTCTTACTCAAGATAACGGCGGAGCTGATGTATTTTGTCATTTCCGTGCAATTGCTTCTGAAGGCTTTAAAACATTGGCTGAAGGCCAAAAAGTTTCATTTGAAGTTGAGCAAGGCCAAAAAGGTCTGCAGGCTGGAAATGTAATCGCACTATAA
GCF_000015725.1_WP_011830051.1	MVNGTVKWFNDAKGFGFIEPEGGGEDVFAHFSAILMDGFRTLKQGARVSFELVDGPKGKLAQNIAPLESRADPAAVRAPANDRELAAGL	ATGGTCAACGGCACGGTCAAGTGGTTCAACGATGCCAAGGGCTTCGGCTTCATCGAACCCGAGGGTGGCGGCGAAGACGTGTTCGCCCATTTCTCGGCCATCCTGATGGACGGCTTTCGCACGCTGAAGCAAGGCGCCCGCGTCAGCTTCGAACTGGTGGACGGCCCCAAGGGCAAGCTGGCCCAGAACATCGCCCCGCTGGAAAGCCGCGCCGACCCGGCGGCGGTCCGCGCTCCGGCCAACGACCGGGAACTGGCCGCCGGCCTCTGA
GCF_000016065.1_WP_011864967.1	MSNTTGTVKWFNEDKGFGFIEQANGGADVFVHFRAIVSDGYKTLAEGQKVTFDIEQGQKGLQAANVVPA	ATGTCTAATACAACTGGTACCGTTAAGTGGTTTAACGAAGATAAAGGTTTTGGTTTCATCGAGCAGGCAAATGGCGGCGCTGATGTGTTCGTGCATTTCCGCGCTATCGTATCTGACGGATACAAGACGCTAGCCGAAGGCCAAAAGGTCACCTTCGATATCGAGCAAGGTCAAAAAGGCTTGCAAGCAGCGAACGTAGTTCCGGCTTAA
GCF_000016065.1_WP_011865363.1	MANGTVKWFNNAKGFGFICPEAGGEDVFAHYSTIEMEGYRTLKAGQSVQFEVEQGPKGMHASAISPTK	ATGGCAAACGGAACTGTGAAATGGTTCAACAACGCCAAAGGATTCGGGTTTATCTGCCCTGAAGCTGGTGGTGAAGACGTTTTCGCACACTATTCTACCATTGAAATGGAAGGCTATCGAACTCTAAAAGCAGGCCAATCAGTCCAATTCGAGGTGGAACAGGGGCCTAAAGGGATGCACGCGTCAGCGATATCGCCCACTAAATAG
GCF_000016985.1_WP_012062542.1	MKTGTVKWFNSEKGFGFIEVEGGDDVFVHFSAITGDGFKTLEEGQKVEFNVVEGNRGPQAENVAKL	ATGAAAACAGGTACAGTAAAATGGTTTAACTCAGAAAAAGGATTTGGATTTATCGAAGTAGAAGGTGGAGATGACGTATTCGTACATTTCTCAGCAATCACTGGAGACGGATTCAAAACATTAGAAGAAGGACAAAAAGTTGAATTCAACGTAGTTGAAGGAAACAGAGGACCTCAAGCTGAGAACGTAGCTAAATTATAG
GCF_000018025.1_WP_012141604.1	MSNSTTGTVKWFNEEKGFGFISQENGGDDVFVHFRAIASDGFKTLAEGQKVSFEVEQGQKGLQAANVVAI	ATGTCTAATTCAACTACTGGTACAGTAAAATGGTTTAACGAAGAGAAAGGTTTCGGATTTATTTCTCAAGAAAATGGCGGTGATGATGTATTCGTTCATTTCCGTGCTATCGCTTCAGATGGTTTCAAGACTCTTGCAGAAGGTCAGAAAGTATCTTTTGAAGTTGAGCAAGGCCAAAAAGGTCTTCAAGCTGCGAACGTAGTAGCTATCTAA
GCF_000018025.1_WP_012142231.1	MANGTVKWFNNAKGFGFICPEAGGEDVFAHYSTIEMEGYRTLKAGQPVQFEVEAGPKGMHASAISPTN	ATGGCAAACGGAACTGTTAAATGGTTCAACAACGCCAAAGGATTCGGGTTTATTTGCCCTGAAGCTGGTGGTGAAGACGTTTTTGCACACTATTCTACCATCGAAATGGAAGGCTATCGAACTCTAAAAGCAGGCCAACCAGTCCAATTCGAAGTGGAAGCGGGTCCAAAAGGTATGCACGCGTCAGCAATTTCGCCAACAAATTAG
GCF_000018045.1_WP_000014594.1	MSGKMTGIVKWFNADKGFGFITPDDGSKDVFVHFSAIQNDGYKSLDEGQKVSFTIESGAKGPAAGNVTSL	ATGTCCGGTAAAATGACTGGTATCGTAAAATGGTTCAACGCTGATAAAGGCTTCGGCTTCATCACTCCTGACGATGGCTCCAAAGACGTGTTCGTACACTTCTCTGCTATCCAGAACGACGGTTACAAATCCCTGGATGAAGGTCAGAAAGTTTCCTTCACCATCGAAAGCGGCGCTAAAGGCCCGGCAGCTGGTAACGTAACCAGCCTGTAA
GCF_000018045.1_WP_000034825.1	MSKIKGNVKWFNESKGFGFITPEDGSKDVFVHFSAIQTNGFKTLAEGQRVEFEITNGAKGPSAANVIAL	ATGTCTAAGATTAAAGGTAACGTTAAGTGGTTTAATGAATCCAAAGGATTCGGTTTCATTACTCCGGAAGATGGCAGCAAAGACGTGTTCGTACACTTCTCTGCAATCCAGACTAATGGTTTTAAAACTCTGGCTGAAGGTCAGCGCGTAGAGTTCGAAATCACTAACGGTGCCAAAGGCCCTTCTGCTGCTAACGTAATCGCTCTGTAA
GCF_000018045.1_WP_000447499.1	METGTVKWFNNAKGFGFICPEGGGEDIFAHYSTIQMDGYRTLKAGQSVRFDVHQGPKGNHASVIVPIEAEAVA	ATGGAAACGGGTACTGTAAAGTGGTTCAACAATGCCAAAGGGTTTGGTTTCATCTGCCCTGAAGGCGGCGGCGAAGATATTTTCGCCCATTACTCCACCATTCAAATGGATGGTTACAGAACGCTTAAAGCCGGGCAGTCTGTCCGGTTTGATGTCCACCAGGGGCCAAAAGGCAATCATGCCAGTGTCATCGTGCCCATCGAAGCAGAAGCCGTTGCATAG
GCF_000018045.1_WP_001062678.1	MAKIKGQVKWFNESKGFGFITPADGSKDVFVHFSAIQGNGFKTLAEGQNVEFEIQDGQKGPAAVNVTAI	ATGGCAAAGATTAAAGGTCAAGTTAAGTGGTTCAACGAGTCTAAAGGTTTTGGCTTCATTACTCCGGCTGATGGCAGCAAAGATGTGTTCGTACACTTCTCCGCTATCCAGGGTAACGGCTTCAAAACCCTGGCTGAAGGCCAGAACGTTGAGTTCGAAATTCAGGACGGCCAGAAAGGTCCGGCTGCTGTTAACGTAACAGCTATCTGA
GCF_000018285.1_WP_012155761.1	MASGTVKWFNNAKGFGFICPDAGGEDVFAHYSTIEMEGYRTLKAGQPVSFEVEAGPKGMHASAISPTN	ATGGCAAGCGGAACTGTTAAATGGTTCAACAACGCCAAAGGATTCGGGTTTATATGCCCTGATGCTGGCGGTGAAGACGTTTTTGCACACTATTCTACCATTGAAATGGAAGGCTATCGAACTCTAAAAGCAGGCCAACCAGTCAGTTTTGAAGTAGAAGCAGGTCCAAAAGGGATGCACGCGTCAGCAATATCGCCAACAAACTGA
GCF_000018285.1_WP_012156476.1	MSNTTGIVKWFNEEKGFGFITQDNGGADVFVHFRAITSDGFKTLAEGQKVSFEVEQGQKGLQAANVIAL	ATGTCTAATACAACTGGTATCGTAAAATGGTTTAACGAAGAGAAAGGTTTTGGTTTCATTACTCAAGACAACGGCGGCGCTGACGTATTCGTTCACTTCCGTGCAATCACTTCAGACGGCTTCAAGACTTTGGCTGAAGGCCAGAAAGTATCTTTCGAAGTAGAGCAAGGTCAAAAAGGCCTTCAAGCAGCTAACGTAATCGCGCTGTAA
GCF_000018325.1_WP_012159851.1	MEKGTVKWFNSEKGYGFISRENGDDVFVHYSAITMDGFKTLEEGQAVNFEIVQGDKGPQATNVTRG	ATGGAAAAAGGTACAGTTAAATGGTTTAATTCAGAAAAAGGTTATGGATTTATTTCAAGAGAAAATGGTGACGATGTATTCGTACACTATTCAGCAATCACTATGGATGGATTCAAGACATTAGAAGAAGGACAAGCCGTTAATTTTGAAATCGTTCAAGGTGATAAAGGACCTCAAGCTACGAACGTAACAAGAGGATAG
GCF_000019045.1_WP_003398700.1	MNTGKVKWFNAEKGFGFIETDGGTDVFVHFTAIQGTGFKTLEEGEKVTFDIVNGNRGPQAANVQKA	ATGAACACAGGTAAAGTAAAATGGTTTAATGCAGAGAAAGGTTTTGGATTCATTGAGACGGACGGAGGTACAGACGTATTCGTTCACTTCACAGCGATCCAAGGTACTGGATTCAAAACGTTGGAAGAAGGCGAAAAAGTAACATTTGACATCGTGAATGGTAACCGTGGGCCGCAAGCGGCAAACGTCCAAAAAGCATAA
GCF_000019045.1_WP_003398931.1	MQNGKVKWFNNEKGYGFIEVEGGDDVFVHFTAIQGEGYKTLEEGQAVSFEIVQGNRGPQAANVVKL	ATGCAAAACGGTAAAGTAAAATGGTTTAACAACGAAAAAGGTTACGGATTCATCGAAGTTGAAGGTGGAGACGATGTATTCGTACACTTCACAGCAATCCAAGGTGAAGGCTACAAAACGTTAGAAGAAGGTCAAGCTGTTTCTTTTGAAATCGTTCAAGGAAACCGTGGCCCTCAAGCTGCAAACGTAGTGAAATTATAA
GCF_000019185.1_WP_012155761.1	MASGTVKWFNNAKGFGFICPDAGGEDVFAHYSTIEMEGYRTLKAGQPVSFEVEAGPKGMHASAISPTN	ATGGCAAGCGGAACTGTTAAATGGTTCAACAACGCCAAAGGATTCGGGTTTATATGCCCTGATGCTGGCGGTGAAGACGTTTTTGCACACTATTCTACCATTGAAATGGAAGGCTATCGAACGCTAAAAGCAGGCCAACCAGTCAGTTTTGAGGTAGAAGCAGGTCCAAAAGGGATGCACGCGTCAGCAATATCGCCAACAAACTAA
GCF_000019185.1_WP_012156476.1	MSNTTGIVKWFNEEKGFGFITQDNGGADVFVHFRAITSDGFKTLAEGQKVSFEVEQGQKGLQAANVIAL	ATGTCTAATACAACTGGTATCGTAAAATGGTTTAACGAAGAGAAAGGTTTTGGTTTCATTACTCAAGACAACGGCGGCGCTGACGTATTCGTTCACTTCCGTGCTATCACTTCAGACGGCTTCAAGACTTTGGCTGAAGGCCAGAAAGTATCTTTCGAAGTAGAGCAAGGTCAAAAAGGCCTTCAAGCAGCTAACGTAATCGCGCTGTAA
GCF_000019245.4_WP_003566521.1	MEHGTVKWFNAEKGYGFITREDGSDVFVHFSAIQGDGYKTLEEGQAVTFEVEDSDRGPQAVNVNKD	ATGGAACACGGCACAGTTAAATGGTTCAATGCTGAAAAGGGTTACGGTTTTATCACTCGCGAAGATGGTAGCGATGTTTTCGTTCACTTCTCAGCTATCCAAGGCGACGGCTACAAGACCCTCGAAGAAGGCCAAGCAGTCACTTTTGAAGTTGAAGACAGCGATCGCGGTCCACAAGCGGTTAACGTTAACAAAGACTAA
GCF_000019505.1_WP_006477070.1	MATGTVKWFNDAKGFGFITPEGGGDDLFAHFSEIRVEGFKTLQENQKVEFEVKTGPKGLQAANIRPV	ATGGCAACCGGTACCGTCAAGTGGTTCAATGACGCAAAGGGCTTCGGCTTCATCACCCCGGAAGGCGGCGGCGACGATCTGTTCGCGCACTTCTCGGAAATCCGCGTCGAAGGCTTCAAGACGCTGCAAGAAAACCAGAAGGTTGAATTCGAAGTGAAGACGGGCCCGAAGGGTCTGCAAGCTGCGAACATCCGTCCGGTCTAA
GCF_000019505.1_WP_006478030.1	MATGIVKWFNDAKGFGFITPDEGGEDLFAHFSAITMNGFKTLKEGQKVSFDVVQGPKGKQASNIQAA	ATGGCAACTGGTATCGTTAAGTGGTTCAACGACGCGAAGGGCTTCGGTTTCATCACTCCCGACGAGGGCGGTGAGGATCTGTTTGCGCACTTCTCGGCTATCACCATGAATGGCTTCAAGACGCTGAAGGAAGGCCAGAAGGTGAGCTTTGACGTCGTTCAAGGACCGAAGGGCAAGCAAGCGTCGAACATCCAGGCCGCATAA
GCF_000019525.1_WP_012142231.1	MANGTVKWFNNAKGFGFICPEAGGEDVFAHYSTIEMEGYRTLKAGQPVQFEVEAGPKGMHASAISPTN	ATGGCAAACGGAACTGTTAAATGGTTCAACAACGCCAAAGGATTCGGGTTTATCTGCCCTGAAGCTGGTGGTGAAGACGTTTTTGCACACTATTCTACCATTGAAATGGAAGGCTATCGAACGCTAAAAGCAGGCCAACCAGTCCAATTTGAAGTGGAAGCGGGTCCTAAAGGTATGCACGCGTCAGCTATTTCGCCAACCAATTAG
GCF_000019525.1_WP_012323996.1	MSNSTTGTVKWFNEEKGFGFISQENGGADVFVHFRAIASDGFKTLAEGQKVSFEVEQGQKGLQAANVVAL	ATGTCTAATTCAACTACTGGTACTGTAAAATGGTTTAACGAAGAGAAAGGTTTCGGCTTTATCTCTCAAGAGAATGGCGGCGCTGACGTATTCGTTCACTTCCGTGCTATCGCTTCTGATGGTTTCAAGACTCTTGCAGAAGGTCAGAAAGTATCTTTTGAAGTTGAGCAAGGTCAAAAAGGCCTTCAAGCTGCTAACGTAGTAGCTCTATAA
GCF_000019905.1_WP_012370557.1	MEQGKVKWFNAEKGFGFIERESGDDVFVHFSAIQTDGFKSLDEGQEVSFEVEEGQRGPQATNVTKL	ATGGAACAAGGTAAAGTGAAATGGTTTAACGCAGAAAAAGGTTTTGGCTTCATCGAACGTGAAAGCGGCGACGACGTTTTCGTTCACTTCTCAGCTATTCAAACAGACGGTTTCAAATCACTTGACGAAGGTCAAGAAGTTTCGTTTGAAGTTGAAGAAGGCCAACGCGGACCACAAGCAACTAACGTTACTAAACTTTAA
GCF_000019905.1_WP_012370558.1	MEQGTVKWFNAEKGFGFIERENGDDVFVHFSAIQTDGFKSLDEGQEVSFEVEEGQRGPQATNVTKL	ATGGAACAAGGTACAGTAAAATGGTTTAACGCAGAAAAAGGTTTTGGCTTCATCGAACGTGAAAACGGCGACGACGTTTTCGTTCACTTCTCAGCTATTCAAACAGACGGTTTCAAATCACTTGACGAAGGTCAAGAAGTTTCGTTTGAAGTTGAAGAAGGCCAACGCGGACCACAAGCAACTAACGTTACTAAACTTTAA
GCF_000020005.1_WP_012448641.1	MQGKVKWFNADRGYGFIERDGGDDVFVHYSAIQEEGFKTLEDGQDVEFEIVEGPRGPQAANVVKL	ATGCAAGGTAAAGTTAAGTGGTTCAACGCAGACAGAGGTTATGGATTTATCGAGAGAGACGGTGGAGATGACGTTTTTGTACATTATAGTGCCATTCAAGAAGAAGGTTTCAAAACACTAGAAGATGGCCAAGATGTAGAATTTGAAATTGTTGAAGGACCTCGAGGTCCTCAAGCGGCTAATGTAGTTAAGCTATAA
GCF_000020045.1_WP_007586257.1	MATGTVKWFNDAKGFGFITPDEGGEDLFAHFSAIQMNGFKTLKEGQKVSFEVVQGPKGKQASNIQSAA	ATGGCAACTGGTACGGTCAAGTGGTTCAACGACGCGAAAGGTTTCGGATTCATTACGCCCGACGAAGGCGGTGAGGATCTGTTTGCACACTTTTCGGCTATCCAGATGAACGGTTTCAAGACCCTCAAGGAAGGCCAGAAGGTTAGCTTCGAGGTCGTTCAAGGCCCGAAGGGCAAACAGGCATCGAACATTCAGTCCGCAGCCTGA
GCF_000020045.1_WP_012402098.1	METGTVKWFNDAKGFGFITPDAGGEDLFAHFSEIRVEGFKTLQENQKVTYDVKTGPKGKQAANIKPA	ATGGAAACCGGTACCGTCAAGTGGTTCAATGACGCAAAGGGCTTTGGCTTCATCACCCCGGACGCTGGCGGCGAAGATCTGTTCGCGCATTTCTCGGAAATCCGCGTCGAAGGCTTCAAGACGCTGCAGGAAAACCAAAAGGTTACCTACGACGTCAAGACGGGCCCGAAGGGCAAGCAAGCCGCTAACATCAAGCCGGCCTAA
GCF_000020045.1_WP_012404419.1	MATGTVKWFNDAKGFGFITPDDGGEDLFAHFSEIRTEGFKSLQENQKVSFEVKMGPKGKQAANIKPA	ATGGCAACCGGCACAGTGAAATGGTTCAACGATGCAAAGGGCTTTGGCTTCATCACTCCAGATGACGGTGGGGAAGACCTGTTTGCCCACTTCTCGGAAATCAGGACAGAGGGCTTCAAGTCGCTGCAGGAAAACCAGAAGGTAAGCTTCGAGGTAAAAATGGGACCGAAGGGCAAGCAGGCGGCGAATATCAAGCCTGCCTGA
GCF_000020045.1_WP_012406518.1	MATGTVKWFNDAKGFGFITPDDGGEDLFAHFSEIKTEGFKSLQENQKVSFDVKMGPKGKQAANIKPV	ATGGCAACTGGTACAGTGAAATGGTTTAACGATGCGAAGGGCTTTGGTTTCATCACTCCGGACGACGGCGGGGAAGACCTGTTCGCCCACTTCTCGGAAATCAAGACTGAAGGCTTCAAGTCATTGCAGGAAAACCAAAAAGTAAGCTTCGACGTGAAGATGGGACCGAAGGGCAAGCAGGCTGCAAATATCAAGCCTGTGTAA
GCF_000020125.1_WP_007180251.1	METGTVKWFNDAKGFGFITPDGGGEDLFAHFSEIRTEGFKTLQENQKVTFEVKTGPKGKQAANIKPV	ATGGAAACCGGTACCGTCAAGTGGTTCAATGACGCAAAGGGCTTTGGCTTCATCACGCCGGACGGCGGCGGCGAAGATCTGTTCGCGCATTTCTCGGAAATCCGCACGGAAGGCTTCAAGACGCTGCAAGAAAACCAAAAGGTTACGTTTGAAGTGAAGACGGGCCCGAAGGGCAAGCAAGCTGCTAACATCAAGCCGGTGTAA
GCF_000020125.1_WP_007180614.1	MATGTVKWFNDAKGFGFITPDEGGEDLFAHFSAIQMNGFKTLKEGQKVTFEVVQGPKGKQASNIQAPA	ATGGCAACTGGTACGGTCAAATGGTTCAATGACGCAAAAGGTTTCGGATTCATCACGCCTGACGAAGGTGGTGAGGATCTGTTTGCACACTTCTCGGCCATCCAGATGAATGGGTTCAAGACCCTGAAGGAAGGCCAAAAGGTGACCTTCGAGGTCGTGCAAGGCCCGAAAGGCAAACAGGCATCGAACATCCAGGCACCTGCCTGA
GCF_000021045.1_WP_012701388.1	MLSGKVKWFNNAKGYGFIVADGRDEDLFAHYSAIQMDGYKTLKAGQAVTFELLQGPKGLHAINIHPCPAPIENSAKLGLAQPSSLTDIAGTL	ATGCTAAGCGGCAAGGTCAAATGGTTCAACAACGCCAAGGGATACGGATTCATCGTGGCAGATGGCCGCGACGAAGACTTGTTCGCCCACTACTCGGCAATTCAGATGGATGGCTACAAGACCTTGAAGGCCGGTCAGGCAGTAACTTTCGAGCTGCTGCAGGGCCCGAAAGGCCTCCATGCAATCAATATCCATCCCTGCCCAGCGCCGATCGAGAATTCGGCCAAGCTCGGCCTGGCACAACCCTCGTCCCTTACGGACATTGCCGGTACGCTATAG
GCF_000022025.1_WP_013599688.1	MATGTVKWFNAEKGFGFIAPDDGSADVFAHYSAIASSGYRSLDENQKVEFDVTQGPKGPQAENIRPL	ATGGCAACAGGCACAGTTAAATGGTTCAACGCCGAAAAGGGTTTTGGCTTCATTGCCCCCGATGACGGGTCCGCTGACGTTTTCGCCCACTACTCGGCAATCGCCAGCAGCGGTTACCGCTCACTGGACGAGAACCAGAAGGTCGAATTCGATGTGACCCAGGGCCCCAAGGGTCCGCAGGCAGAGAACATCCGCCCGCTCTAA
GCF_000023065.1_WP_015879387.1	MATGTVKWFNNAKGFGFICPDEGGDDIFAHYSTIDMNGYKTLKAGQPVEFEVQAGPKGSHATSIVPTASQES	ATGGCTACTGGAACCGTAAAGTGGTTTAACAATGCGAAAGGCTTTGGCTTCATCTGCCCGGATGAAGGCGGTGATGATATTTTTGCTCATTATTCCACTATCGACATGAACGGGTACAAGACGCTGAAAGCGGGGCAGCCTGTTGAGTTTGAAGTACAAGCAGGGCCTAAAGGGTCACATGCCACGAGCATTGTCCCTACCGCATCCCAGGAATCATAA
GCF_000023545.1_WP_012764705.1	MSKIKGSVKWFNESKGFGFITPEDGSKDVFVHFSAIQSTGFKTLAEGQRVEFEITNGAKGPSAANVIAI	ATGTCTAAGATTAAAGGTAGCGTTAAGTGGTTTAATGAGTCCAAAGGATTCGGTTTCATTACTCCGGAAGATGGTAGCAAAGATGTATTCGTACACTTCTCCGCTATCCAGAGCACTGGTTTCAAAACCCTGGCTGAAGGTCAGCGCGTAGAGTTTGAAATCACTAACGGTGCTAAAGGTCCTTCCGCTGCTAACGTTATCGCTATTTAA
GCF_000023545.1_WP_015853726.1	MAKIKGQVKWFNESKGFGFITPADGSKDVFVHFSAIQGTGFKTLAEGQNVEFEIQDGQKGPSAVNVTAL	ATGGCAAAGATTAAAGGTCAGGTTAAGTGGTTCAACGAGTCCAAAGGCTTCGGTTTCATTACTCCGGCTGACGGCAGCAAAGATGTGTTTGTGCACTTCTCTGCAATTCAAGGCACTGGTTTCAAAACGTTGGCAGAAGGCCAGAACGTTGAGTTTGAAATTCAGGACGGACAGAAAGGCCCGTCTGCGGTTAACGTTACCGCACTGTAA
GCF_000023545.1_WP_015853818.1	MSNKMTGLVKWFDAGKGFGFITPDNGSKDVFVHFSAIQSDDYKTLYEGQKVEFVIQQGQKGPAAGNVTVL	ATGTCTAATAAAATGACTGGTTTGGTAAAATGGTTTGATGCGGGTAAAGGCTTCGGTTTTATTACTCCGGATAACGGTAGCAAAGATGTATTCGTACATTTTTCCGCTATCCAGTCTGATGACTACAAAACGCTGTACGAAGGCCAGAAAGTGGAGTTCGTGATTCAGCAAGGCCAGAAAGGGCCTGCGGCTGGCAACGTTACCGTACTGTAA
GCF_000023545.1_WP_015853961.1	METGTVKWFNNAKGFGFICPEDGGEDIFAHYSTIQMDGYRTLKAGQIVKFTVHQGPKGNHASLIVPVVGETVA	ATGGAGACGGGTACTGTTAAATGGTTCAATAATGCCAAAGGCTTTGGCTTTATTTGTCCTGAAGACGGCGGAGAAGATATCTTCGCTCACTATTCGACGATTCAGATGGATGGTTACAGGACGCTAAAAGCCGGGCAAATAGTAAAATTCACCGTGCACCAGGGGCCTAAAGGAAATCATGCCAGTCTGATCGTGCCGGTGGTCGGCGAAACGGTCGCCTGA
GCF_000023565.1_WP_009113827.1	MSKIKGSVKWFNESKGFGFITPEDGSKDVFVHFSAIQSNGFKTLAEGQRVEFEITSGAKGPSAANVIAI	ATGTCTAAGATTAAAGGTAGCGTTAAGTGGTTTAATGAGTCCAAAGGATTCGGTTTCATTACTCCGGAAGATGGCAGCAAGGACGTATTCGTTCACTTCTCTGCTATCCAGAGCAACGGTTTCAAAACCCTGGCTGAAGGTCAGCGCGTAGAGTTTGAAATCACCAGCGGCGCTAAAGGACCTTCTGCTGCTAACGTTATCGCTATTTAA
GCF_000023565.1_WP_012768004.1	MSNKMTGSVKWFNESKGFGFISPADGSKDVFVHFSAIQSDSFKTLYEGQKVEFVIGNGPKGPSAENVVGL	ATGTCTAATAAAATGACTGGTTCAGTAAAATGGTTTAACGAATCTAAAGGTTTTGGCTTTATCAGCCCGGCTGATGGCAGCAAAGACGTATTCGTGCATTTCTCTGCAATTCAGAGCGATAGCTTTAAGACCCTGTATGAAGGTCAGAAAGTAGAATTCGTTATCGGCAACGGCCCGAAAGGTCCTTCTGCTGAAAACGTAGTAGGGCTGTAA
GCF_000023565.1_WP_012769694.1	MAKIKGQVKWFNESKGFGFITPADGSKDVFVHFSAIQGNGFKTLAEGQNVEFEIQDGQKGPSAVNVVAL	ATGGCAAAGATTAAAGGTCAGGTTAAGTGGTTCAACGAGTCTAAAGGCTTCGGTTTCATTACTCCGGCTGATGGCAGCAAAGATGTGTTCGTACACTTCTCTGCAATTCAGGGCAACGGCTTTAAAACATTGGCCGAAGGCCAGAATGTTGAGTTTGAAATTCAGGATGGCCAGAAAGGCCCTTCAGCAGTGAATGTTGTTGCGCTGTAA
GCF_000023565.1_WP_012770072.1	METGTVKWFNNAKGFGFICPESGGEDIFAHYSTIQMDGYRTLKAGQVVQFTVHQGPKGNHASLIVPVAGETVA	ATGGAGACAGGTACTGTTAAATGGTTCAATAACGCCAAAGGCTTTGGCTTTATTTGTCCCGAGAGCGGTGGTGAAGATATTTTCGCCCACTATTCAACCATTCAGATGGACGGCTACAGGACGCTGAAAGCAGGTCAGGTGGTGCAATTTACCGTGCACCAGGGGCCTAAAGGGAATCACGCCAGTCTGATCGTACCGGTCGCCGGTGAAACGGTCGCCTGA
GCF_000024205.1_WP_015758410.1	MEGTVKWFNAEKGFGFIEQEGGGDIFVHFSAIQGDGFKTLDEGQKVKFEVVEGNRGPQAANVSRI	ATGGAGGGTACAGTTAAGTGGTTTAATGCTGAAAAAGGTTTTGGTTTTATTGAGCAGGAGGGTGGCGGTGATATATTTGTTCACTTTTCTGCTATCCAAGGGGATGGCTTTAAAACCCTGGATGAAGGGCAAAAAGTAAAATTTGAAGTTGTAGAAGGAAACCGCGGTCCTCAGGCAGCTAACGTTAGCCGCATCTAA
GCF_000024285.1_WP_008340254.1	MYEGTVKWFNSEKGYGFIQVENGDDVFVHYSAIQGHGFKTLDEGQRVTFDIVEGPKGPQAANVVKY	ATGTACGAAGGTACAGTCAAGTGGTTCAACTCGGAGAAGGGCTACGGTTTCATTCAGGTGGAGAACGGGGACGACGTGTTCGTTCATTACAGCGCCATCCAAGGACACGGCTTCAAGACGCTGGACGAAGGGCAACGCGTGACGTTCGACATCGTTGAGGGGCCCAAGGGTCCGCAGGCAGCGAATGTCGTGAAATATTAA
GCF_000024825.1_WP_005378407.1	MATGTVKWFNNAKGFGFICSDEEEGDIFAHYSTIQMDGYRTLKAGQQVSYEIEKGPKGCHASSVVPLEGQAK	ATGGCTACAGGTACAGTAAAGTGGTTTAACAATGCCAAAGGATTTGGGTTTATTTGTTCAGATGAAGAAGAGGGAGATATCTTTGCCCACTACTCAACTATCCAGATGGACGGTTATCGTACACTGAAAGCAGGCCAACAAGTCTCATACGAGATTGAAAAAGGTCCCAAAGGCTGTCACGCGAGTAGCGTCGTGCCTCTTGAAGGTCAAGCCAAATAA
GCF_000024925.1_WP_012865286.1	MAVGTVKWFNAEKGFGFIAPEDGSADVFAHYSAIQSSGYRSLDENQKVEFDITQGPKGPQAENIRPL	ATGGCAGTTGGGACCGTGAAGTGGTTCAACGCAGAAAAGGGCTTCGGCTTCATCGCACCGGAGGACGGCAGCGCTGACGTGTTCGCCCACTACTCTGCGATCCAGAGTTCGGGTTACCGTTCGCTCGACGAGAACCAGAAGGTCGAGTTCGACATCACCCAGGGCCCCAAGGGCCCCCAGGCGGAGAACATCCGCCCGCTCTGA
GCF_000024925.1_WP_042437666.1	MTVGTVKWFNAEKGFGFIAPEDGSADVFAHYSAIASSGYRSLDENQKVEFDVTQGPKGPQAENIRPL	ATGACTGTTGGAACTGTGAAGTGGTTCAACGCTGAAAAGGGCTTCGGCTTCATCGCACCCGAGGACGGCTCCGCCGACGTGTTCGCGCACTACTCCGCGATCGCCTCGTCCGGCTACCGCTCGCTCGACGAGAACCAGAAGGTCGAGTTCGACGTCACCCAGGGTCCCAAGGGCCCCCAGGCTGAGAACATCCGCCCCCTCTGA
GCF_000025065.1_WP_009113827.1	MSKIKGSVKWFNESKGFGFITPEDGSKDVFVHFSAIQSNGFKTLAEGQRVEFEITSGAKGPSAANVIAI	ATGTCTAAGATTAAAGGTAGCGTTAAGTGGTTTAATGAGTCCAAAGGATTCGGTTTCATTACTCCGGAAGATGGCAGCAAGGACGTATTCGTTCACTTTTCTGCTATCCAGAGCAACGGTTTCAAAACCCTGGCTGAAGGTCAGCGCGTAGAGTTTGAAATCACCAGCGGCGCTAAAGGACCTTCTGCTGCTAACGTTATCGCTATTTAA
GCF_000025065.1_WP_012768004.1	MSNKMTGSVKWFNESKGFGFISPADGSKDVFVHFSAIQSDSFKTLYEGQKVEFVIGNGPKGPSAENVVGL	ATGTCTAATAAAATGACTGGTTCAGTAAAATGGTTTAACGAATCTAAAGGTTTTGGCTTTATCAGCCCGGCTGATGGCAGCAAAGACGTATTCGTACACTTCTCTGCAATTCAGAGCGACAGCTTCAAAACGCTGTACGAAGGCCAGAAAGTGGAATTCGTTATCGGCAACGGTCCGAAAGGTCCTTCTGCTGAGAACGTAGTAGGGCTGTAA
GCF_000025065.1_WP_012769694.1	MAKIKGQVKWFNESKGFGFITPADGSKDVFVHFSAIQGNGFKTLAEGQNVEFEIQDGQKGPSAVNVVAL	ATGGCAAAGATTAAAGGTCAGGTTAAGTGGTTCAACGAGTCTAAAGGCTTCGGTTTCATTACTCCGGCTGATGGCAGCAAAGACGTGTTCGTACACTTCTCTGCAATTCAGGGCAACGGCTTCAAAACATTGGCTGAAGGCCAGAATGTTGAGTTCGAAATTCAGGATGGCCAGAAAGGTCCTTCTGCAGTGAATGTTGTTGCGCTGTAA
GCF_000025065.1_WP_012770072.1	METGTVKWFNNAKGFGFICPESGGEDIFAHYSTIQMDGYRTLKAGQVVQFTVHQGPKGNHASLIVPVAGETVA	ATGGAGACAGGTACTGTTAAATGGTTTAATAACGCCAAAGGCTTTGGCTTTATTTGCCCCGAAAGCGGTGGTGAAGATATTTTCGCCCACTATTCAACCATTCAGATGGACGGCTACAGGACGCTGAAAGCAGGTCAGGTCGTGCAATTTACCGTGCACCAGGGACCAAAAGGAAATCACGCCAGTCTGATCGTACCAGTCGCCGGTGAAACGGTCGCCTGA
GCF_000025305.1_WP_009015310.1	MTGKVKWFNAEKGYGFIEREDGGDVFVHFSAIQGEGFKTLEEGQAVEFDVVEGNRGEQAANVVKL	ATGACTGGCAAAGTTAAATGGTTTAATGCTGAAAAGGGTTATGGTTTCATCGAACGGGAAGATGGCGGCGATGTATTCGTTCATTTCTCCGCAATCCAGGGTGAAGGCTTCAAGACTCTGGAAGAAGGCCAGGCTGTAGAATTCGACGTTGTCGAAGGCAACCGTGGCGAACAGGCTGCCAACGTTGTGAAACTGTAA
GCF_000025965.1_WP_011238349.1	MATGTVKWFNDSKGFGFITPDDGSEDLFAHFSAINMNGFKTLKEGEKVSFEVTQGPKGKQASNIQKA	ATGGCAACTGGTACTGTCAAGTGGTTCAACGACTCGAAGGGCTTCGGCTTCATTACTCCGGACGATGGCAGCGAGGATCTCTTCGCGCATTTCTCCGCGATCAACATGAACGGGTTCAAGACGTTGAAGGAAGGGGAGAAGGTTTCCTTCGAAGTTACCCAGGGCCCGAAAGGCAAACAGGCCTCTAACATCCAGAAGGCCTGA
GCF_000026085.1_WP_011328402.1	MACGKVKWFNNAKGFGFIVEDGCENDIFAHYSTIVMDGYKTLKAGQDVTFELEQGPKGLHAKNIAPNGDIIE	ATGGCTTGTGGTAAAGTCAAATGGTTCAATAATGCCAAAGGTTTCGGTTTCATCGTAGAAGACGGCTGCGAGAATGATATTTTCGCTCATTACTCAACAATTGTAATGGACGGCTATAAAACACTTAAAGCTGGTCAAGATGTAACATTCGAATTAGAACAAGGCCCTAAAGGCTTACATGCTAAAAATATAGCGCCTAACGGTGATATTATTGAGTGA
GCF_000026185.1_WP_001062678.1	MAKIKGQVKWFNESKGFGFITPADGSKDVFVHFSAIQGNGFKTLAEGQNVEFEIQDGQKGPAAVNVTAI	ATGGCAAAGATTAAAGGTCAGGTTAAGTGGTTCAACGAGTCTAAAGGTTTTGGTTTCATCACTCCTGCTGACGGCAGCAAAGACGTGTTCGTACACTTCTCTGCAATCCAGGGTAATGGCTTCAAAACTCTGGCTGAAGGCCAGAACGTTGAGTTCGAAATTCAGGACGGCCAGAAAGGTCCAGCGGCTGTGAACGTCACCGCTATCTGA
GCF_000026185.1_WP_004156612.1	MSKIKGSVKWFNESKGFGFITPEDGSKDVFVHFSAIQSNGFKTLAEGQRVEFEITNGAKGPSAANVAAI	ATGTCTAAGATCAAAGGTAGCGTTAAGTGGTTTAATGAGTCCAAAGGTTTCGGTTTCATTACTCCTGAAGATGGTAGCAAAGATGTGTTCGTACACTTCTCTGCCATCCAGAGCAACGGTTTCAAAACTCTGGCTGAAGGTCAGCGCGTAGAGTTCGAAATCACTAACGGTGCCAAAGGCCCATCTGCTGCTAACGTTGCCGCTATTTAA
GCF_000026185.1_WP_012442280.1	MSNKMTGLVKWFNAEKGFGFISPTDGSKDVFVHFSAIQNGGFKTLEEGQKVEFTIENGQKGPAAANVTAL	ATGTCTAACAAAATGACTGGTTTGGTAAAATGGTTCAACGCTGAGAAAGGTTTCGGCTTCATCTCCCCAACCGACGGTAGCAAAGACGTTTTCGTACACTTCTCTGCAATTCAGAACGGCGGCTTCAAGACGCTGGAAGAAGGCCAGAAAGTTGAGTTCACTATCGAAAACGGCCAGAAAGGCCCAGCAGCAGCTAACGTAACTGCGCTGTAA
GCF_000027145.1_WP_003720346.1	MQTGTVKWFNSEKGFGFIEVEGGDDVFVHFSAIEGDGFKTLDEGQSVEFEIVEGQRGPQAEKVTKL	ATGCAAACAGGTACAGTAAAATGGTTTAACAGTGAAAAAGGCTTCGGTTTCATCGAAGTAGAAGGCGGAGATGATGTATTCGTACATTTCAGCGCTATCGAAGGTGACGGATTCAAAACTTTAGACGAAGGTCAAAGCGTAGAATTTGAAATCGTTGAAGGGCAACGTGGCCCACAAGCAGAAAAAGTTACAAAACTTTAA
GCF_000027145.1_WP_003728273.1	MQNGKVKWFNNEKGYGFIESDGGEDIFVHFTAIQGDGYKSLEEGQAVTFEVVEGNRGAQAANVEKA	ATGCAAAATGGGAAAGTAAAATGGTTTAACAATGAAAAGGGTTACGGTTTTATCGAATCAGACGGCGGCGAAGATATTTTTGTTCATTTCACAGCAATCCAAGGTGACGGCTACAAATCTTTAGAAGAAGGCCAAGCGGTCACTTTTGAAGTAGTAGAAGGTAATCGTGGCGCTCAAGCTGCAAATGTAGAAAAAGCCTAA
GCF_000027145.1_WP_012985572.1	MEQGTVKWFNAEKGFGFIERENGDDVFVHFSAIQGDGFKSLDEGQAVSFDVEEGQRGPQAANVQKA	ATGGAACAAGGTACAGTAAAATGGTTTAACGCAGAAAAAGGATTTGGTTTTATCGAACGCGAAAACGGTGACGATGTATTCGTACATTTCAGCGCTATCCAAGGTGACGGATTCAAATCTTTAGACGAAGGTCAAGCAGTATCTTTCGACGTTGAAGAAGGCCAACGCGGACCTCAAGCAGCTAACGTTCAAAAAGCGTAA
GCF_000069965.1_WP_004243573.1	MSDKMKGQVKWFNESKGFGFITPADGSKDVFVHFSAIQGNGFKTLAEGQNVEFTIENGAKGPAAANVTAL	ATGTCTGACAAAATGAAAGGTCAAGTTAAGTGGTTCAACGAGTCTAAAGGCTTTGGTTTTATTACTCCAGCAGACGGAAGCAAAGACGTATTCGTTCACTTTTCTGCCATTCAAGGTAACGGTTTCAAAACTCTGGCTGAAGGTCAGAACGTAGAATTCACAATTGAAAACGGTGCAAAAGGTCCAGCAGCTGCTAACGTAACAGCTCTGTAA
GCF_000069965.1_WP_004244557.1	METGTVKWFNNAKGFGFITPAAGGEDIFAHYSSIRMEGYRTLKAGQKVNYSTIKGPKGDHADLIIPIIE	ATGGAGACAGGTACAGTTAAGTGGTTTAACAACGCTAAGGGTTTTGGTTTCATTACCCCTGCCGCAGGTGGCGAAGATATTTTTGCCCATTATTCATCAATAAGAATGGAAGGCTACCGCACACTGAAAGCGGGTCAGAAAGTTAATTATAGCACAATAAAAGGACCTAAAGGGGATCATGCTGATCTTATCATTCCTATTATCGAATAA
GCF_000069965.1_WP_004246068.1	MSKLKGNVKWFNETKGFGFITPEDGSKDVFVHFSAIVSEGFKTLAEGQKVEFEVTDGAKGPSAANVVAI	ATGTCTAAATTAAAAGGTAACGTTAAGTGGTTTAACGAAACTAAAGGTTTTGGTTTTATCACTCCAGAAGATGGCAGTAAAGATGTGTTCGTCCACTTTTCCGCTATTGTTTCAGAAGGTTTTAAAACACTTGCTGAAGGTCAAAAGGTAGAGTTTGAAGTTACTGACGGCGCGAAAGGGCCATCTGCTGCAAACGTTGTCGCTATCTAA
GCF_000069965.1_WP_004247021.1	MSNTMTGTVKWFNDDKGFGFITPKDGSKDVFVHFSAIQSDSFKSLKEGQEVSFSIENGAKGPAAANVIGL	ATGTCTAATACAATGACTGGTACAGTTAAATGGTTTAACGACGATAAAGGCTTTGGCTTTATCACACCTAAAGATGGTAGCAAAGATGTATTTGTTCACTTTTCAGCAATTCAAAGCGATAGCTTTAAATCACTGAAAGAAGGCCAAGAAGTATCATTCTCTATTGAAAATGGTGCAAAAGGTCCAGCAGCTGCTAATGTTATCGGTCTGTAA
GCF_000069965.1_WP_004247137.1	MSNTMTGTVKWFNDDKGFGFITPKDGSKDVFVHYSAIQSDDFKSLMEGQEVSFTMENGMKGPAAGNVVAL	ATGTCTAATACAATGACTGGTACAGTAAAATGGTTTAACGATGATAAAGGTTTTGGTTTCATCACTCCTAAAGATGGAAGTAAAGATGTATTTGTACATTACTCTGCAATTCAGAGTGATGACTTCAAATCTCTGATGGAAGGCCAAGAAGTTTCATTTACCATGGAAAATGGTATGAAAGGCCCAGCAGCAGGCAACGTGGTGGCTCTCTAA
GCF_000069965.1_WP_004247907.1	MSNSMTGTVKWFDEGKGFGFITPADGSKDVFVHFSAIQSDNFKTLAEGQQVSFTMENGMKGPAAGNVVAL	ATGTCTAATTCAATGACTGGTACAGTAAAATGGTTCGATGAAGGTAAAGGTTTTGGTTTTATTACTCCAGCAGATGGCAGCAAAGATGTATTCGTGCATTTCTCTGCAATCCAAAGTGATAACTTCAAAACATTAGCTGAAGGCCAACAAGTTTCATTTACCATGGAAAATGGTATGAAAGGCCCTGCAGCAGGCAACGTGGTGGCTCTCTAA
GCF_000091325.1_WP_005500728.1	MANGTVKWFNNAKGFGFICPDAGGEDVFAHYSTIEMEGYRTLKAGQPVQFEVEAGPKGMHASVISTIN	ATGGCAAATGGAACTGTTAAATGGTTCAACAACGCCAAAGGATTCGGGTTTATTTGCCCAGATGCTGGCGGTGAAGATGTTTTTGCACACTATTCTACCATTGAAATGGAAGGCTATCGAACTCTAAAAGCAGGCCAGCCAGTTCAATTTGAAGTAGAAGCGGGTCCAAAAGGTATGCACGCGTCAGTAATATCAACAATTAATTAA
GCF_000091325.1_WP_013050473.1	MMKGTVKWFNNTKGFGFICPGAGGEDVFAHYSAIQMEGYRTLVAGQTVEYKVEAGPKGMHALAITPADEMSVN	ATGATGAAAGGAACGGTTAAGTGGTTTAACAACACCAAAGGCTTTGGGTTTATCTGTCCAGGTGCTGGTGGTGAGGATGTATTTGCCCACTATTCAGCTATACAGATGGAAGGTTACCGGACTCTGGTGGCGGGTCAAACTGTCGAATATAAGGTAGAAGCTGGTCCTAAAGGCATGCATGCATTGGCTATAACACCAGCTGATGAGATGTCAGTGAATTAG
GCF_000091325.1_WP_013051727.1	MSDSNTGTVKWFNEDKGFGFLTQDNGGADVFVHFRAIASEGFKTLDEGQKVTFEVEQGPKGLQASNVIAL	ATGTCTGATTCAAATACTGGTACTGTAAAATGGTTTAACGAAGATAAAGGATTCGGTTTCCTTACTCAAGATAATGGTGGCGCTGACGTATTCGTACATTTTCGTGCTATCGCATCAGAAGGTTTCAAAACTCTTGATGAAGGTCAAAAAGTGACTTTCGAAGTAGAGCAAGGCCCAAAAGGTCTGCAAGCAAGCAACGTTATCGCTCTTTAA
GCF_000091325.1_WP_013052780.1	MSNSTTGLVKWFNEEKGFGFITQDNGGDDVFVHFRSITSDGFKTLAEGQKVSFEVEQGQKGLQAANVVAL	ATGTCTAATTCAACAACTGGTCTAGTAAAATGGTTTAACGAAGAGAAAGGTTTTGGTTTCATTACTCAAGACAATGGCGGCGATGACGTTTTCGTTCACTTCCGTTCAATCACTTCAGACGGCTTCAAGACTCTTGCTGAAGGCCAAAAAGTATCTTTCGAAGTAGAGCAAGGTCAAAAAGGCCTTCAAGCAGCTAACGTAGTTGCGCTTTAA
GCF_000091465.1_WP_004735656.1	MSNKTNGVVKWFNEEKGFGFLTQDNGGADVFVHFRAIASEGFKTLKEGQQVSFEVEQGQKGLQAANVVAL	ATGTCTAACAAAACAAACGGCGTAGTAAAATGGTTTAACGAAGAGAAAGGCTTCGGTTTCCTAACTCAAGACAACGGCGGCGCTGACGTATTCGTACACTTCCGTGCAATCGCTTCTGAAGGTTTCAAGACTCTTAAAGAAGGCCAACAAGTGTCTTTCGAAGTAGAGCAAGGCCAAAAAGGTCTTCAAGCTGCAAACGTTGTAGCTCTATAA
GCF_000091465.1_WP_009846336.1	MATGTVKWFNNAKGFGFICPEGEDGDIFAHYSTIQMEGYRTLKAGQQVDYEVESGPKGSHASSVVPVEGSAVK	ATGGCTACAGGTACAGTAAAATGGTTTAACAATGCCAAAGGGTTTGGCTTTATTTGTCCAGAAGGTGAAGATGGCGATATTTTCGCGCACTACTCCACAATACAAATGGAAGGTTATCGAACCTTAAAGGCAGGTCAACAGGTCGATTATGAAGTAGAAAGTGGACCTAAAGGCTCCCATGCTAGCTCCGTTGTTCCTGTAGAAGGCAGCGCCGTAAAATAG
GCF_000091565.1_WP_001062678.1	MAKIKGQVKWFNESKGFGFITPADGSKDVFVHFSAIQGNGFKTLAEGQNVEFEIQDGQKGPAAVNVTAI	ATGGCAAAGATTAAAGGTCAGGTTAAGTGGTTCAACGAGTCTAAAGGTTTTGGTTTCATCACTCCTGCTGACGGCAGCAAAGATGTGTTCGTACACTTCTCTGCAATCCAGGGTAATGGCTTCAAAACTCTTGCTGAAGGCCAGAACGTTGAGTTCGAAATTCAGGATGGCCAGAAAGGCCCTGCAGCTGTGAACGTCACCGCTATCTGA
GCF_000091565.1_WP_004156160.1	MSDKMIGLVKWFSPDKGFGFISPTDGSKDVFVHFSAIQNGGFKTLEEGQKVEFTIENGQKGPAAANVTAL	ATGTCTGACAAAATGATTGGTTTGGTAAAATGGTTCAGCCCTGATAAAGGTTTCGGCTTCATCTCCCCAACTGACGGCAGCAAAGACGTGTTTGTACACTTCTCTGCAATCCAGAACGGCGGTTTCAAGACGCTGGAAGAAGGTCAGAAAGTTGAGTTCACTATCGAAAATGGCCAGAAAGGCCCTGCAGCTGCTAACGTTACTGCGCTGTAA
GCF_000091565.1_WP_004156612.1	MSKIKGSVKWFNESKGFGFITPEDGSKDVFVHFSAIQSNGFKTLAEGQRVEFEITNGAKGPSAANVAAI	ATGTCTAAGATTAAAGGTAGCGTTAAGTGGTTTAATGAGTCCAAAGGATTCGGTTTCATTACTCCTGAAGATGGTAGCAAAGATGTGTTCGTACACTTCTCTGCCATCCAGAGCAACGGTTTCAAAACTCTGGCTGAAGGTCAGCGCGTAGAGTTCGAAATCACCAACGGTGCCAAAGGCCCATCTGCTGCTAACGTTGCCGCTATTTAA
GCF_000091565.1_WP_004156882.1	MMTGTVKWFNNAKGFGFICPAGGGDDIFAHYSTIQMDGYRTLKAGQQVQFDVHQGPKGNHASLIVPVEEVLAISA	ATGATGACGGGTACTGTTAAATGGTTTAATAACGCCAAAGGCTTCGGTTTCATCTGCCCGGCGGGCGGTGGCGATGATATCTTCGCCCACTACTCCACTATCCAGATGGACGGTTACCGAACGCTGAAAGCCGGGCAGCAAGTCCAGTTTGATGTGCATCAGGGACCAAAAGGCAACCATGCCAGCCTCATAGTCCCTGTGGAAGAAGTCCTGGCAATTAGCGCCTGA
GCF_000092885.1_WP_007180614.1	MATGTVKWFNDAKGFGFITPDEGGEDLFAHFSAIQMNGFKTLKEGQKVTFEVVQGPKGKQASNIQAPA	ATGGCAACTGGTACGGTCAAATGGTTTAACGACGCAAAGGGTTTCGGATTTATCACGCCTGACGAGGGCGGTGAGGATCTGTTTGCACACTTCTCGGCCATCCAGATGAATGGCTTCAAGACGCTGAAGGAAGGCCAGAAGGTCACCTTCGAAGTCGTGCAAGGCCCGAAAGGTAAACAGGCATCGAACATTCAGGCACCAGCCTGA
GCF_000092885.1_WP_013090665.1	METGTVKWFNDAKGFGFITPDGGGEDLFAHFSEIRVDGFKTLQENQKVTFEVKTGPKGKQAANIKPV	ATGGAAACCGGTACCGTCAAGTGGTTCAACGACGCTAAGGGCTTTGGCTTCATCACTCCGGACGGCGGCGGTGAAGATCTGTTCGCGCATTTCTCGGAAATTCGCGTCGACGGCTTCAAGACGCTGCAAGAAAACCAGAAGGTTACGTTTGAAGTGAAGACGGGCCCGAAGGGCAAGCAAGCAGCTAACATCAAGCCGGTGTAA
GCF_000092885.1_WP_013092907.1	MATGTVKWFNDAKGFGFITPDDGGEDLFAHFSEIQASGFKSLQENQKVSFEVKQGPKGKQAANIQSI	ATGGCAACAGGTACTGTTAAGTGGTTTAACGATGCAAAGGGCTTTGGCTTCATCACCCCGGACGACGGCGGCGAAGACCTGTTTGCACACTTCTCGGAAATCCAGGCATCGGGCTTTAAGTCCCTGCAGGAAAACCAGAAAGTGTCGTTCGAAGTCAAGCAAGGCCCGAAGGGCAAGCAGGCTGCAAACATCCAGTCGATCTAA
GCF_000092905.1_WP_013075778.1	MQGRVKWFNAEKGYGFIEREDGGDVFVHFSAIQQDGFKSLEEGQLVEFDIVEGARGPQAANVVKV	ATGCAAGGAAGGGTTAAATGGTTTAACGCGGAGAAGGGCTACGGGTTCATCGAACGGGAGGACGGAGGCGACGTGTTCGTCCACTTTTCCGCGATCCAGCAGGATGGCTTTAAAAGCCTCGAAGAAGGACAGTTAGTGGAGTTTGACATTGTGGAAGGCGCTCGTGGTCCACAAGCCGCGAACGTCGTCAAAGTGTAA
GCF_000092905.1_WP_013075938.1	MKGKVKWFNAEKGYGFITPDDGGKDVFVHYSAIQEEGFRTLEEGQDVEYDIVEGPRGPQAANVVKL	GTGAAAGGCAAAGTCAAGTGGTTCAATGCGGAGAAGGGTTATGGTTTCATTACGCCGGATGACGGCGGGAAAGACGTGTTTGTGCATTATAGCGCGATTCAGGAAGAAGGGTTTCGTACACTTGAAGAGGGCCAGGACGTCGAGTACGACATCGTGGAAGGTCCGCGGGGCCCCCAGGCAGCGAATGTCGTGAAGTTGTAA
GCF_000093065.1_WP_013087511.1	MSKIKGSVKWFNEAKGFGFISPEDGSKDVFVHFTSIQSEGFKTLTEGQKVEFDVANGEKGPSAINVVAI	ATGTCGAAAATTAAAGGTAGTGTTAAATGGTTCAACGAAGCAAAAGGATTTGGATTTATTAGCCCAGAAGATGGTAGTAAGGATGTTTTCGTTCATTTTACTTCTATTCAATCTGAAGGATTTAAAACTTTAACAGAAGGACAGAAAGTGGAATTTGATGTGGCAAATGGAGAAAAAGGACCTTCTGCAATTAATGTCGTTGCTATTTAA
GCF_000093085.1_WP_013171468.1	MMTGKVKWFNAEKGFGFIEREDGDDVFVHFSAIQAEGFKTLDEGQDVEFEIVEGNRGPQAANVVKL	ATGATGACAGGCAAAGTAAAATGGTTTAATGCAGAAAAAGGGTTTGGATTTATCGAGCGTGAAGATGGCGATGATGTTTTCGTTCACTTCTCCGCAATCCAGGCAGAAGGATTCAAGACGCTGGATGAAGGTCAGGACGTTGAATTCGAAATCGTCGAAGGAAACCGTGGCCCTCAGGCAGCAAACGTTGTAAAGCTGTAA
GCF_000093085.1_WP_013171989.1	MTQGTVKWFNAEKGFGFIEVEGQDDVFVHFSAIQGEGFKTLDEGQTVNFDIEQGQRGPQAANVQK	ATGACACAAGGTACAGTAAAATGGTTTAATGCAGAAAAAGGTTTCGGTTTCATCGAGGTTGAAGGCCAGGACGACGTATTCGTTCACTTCTCCGCTATCCAAGGCGAAGGCTTCAAGACTCTTGACGAAGGCCAGACAGTCAACTTCGACATCGAGCAAGGCCAGCGTGGCCCACAGGCGGCTAACGTACAGAAGTAA
GCF_000093085.1_WP_013173349.1	MTQGTVKWFNAEKGFGFIEVEGQDDVFVHFSAIQGEGFKTLEEGQAVTFDIEQGQRGPQAANVQK	ATGACTCAAGGTACAGTAAAATGGTTTAATGCAGAAAAAGGTTTCGGTTTCATCGAAGTAGAAGGACAGGACGATGTATTCGTACATTTCTCCGCGATCCAAGGCGAAGGCTTCAAGACTCTTGAAGAAGGCCAAGCAGTTACTTTCGACATCGAGCAGGGTCAGCGTGGACCACAAGCTGCTAACGTTCAAAAGTAA
GCF_000145235.1_WP_013288421.1	MAIGTVKWFNADKGFGFITPDDGGADVFAHFSAIQTSGYRSLDENQRVEFEVTQGQKGPQAENIRPL	ATGGCAATTGGCACCGTCAAGTGGTTCAACGCTGACAAGGGCTTCGGCTTCATCACCCCGGACGACGGCGGCGCCGACGTCTTCGCCCACTTCTCGGCGATCCAGACCTCCGGCTACCGGAGCCTGGACGAGAACCAGCGGGTCGAGTTCGAGGTGACCCAGGGCCAGAAGGGCCCGCAGGCGGAGAACATCCGCCCGCTCTGA
GCF_000145255.1_WP_013292401.1	MATGTVKWFNDAKGFGFVTPDDGSEDLFAHFSAINMNGFKTLQEGQKVSFEVTQGPKGKQASNIQAA	ATGGCAACTGGTACAGTTAAGTGGTTCAATGATGCAAAAGGTTTCGGTTTCGTAACTCCTGATGATGGTAGCGAAGATCTGTTCGCACACTTCTCAGCGATCAACATGAACGGTTTCAAGACCCTTCAAGAAGGTCAAAAAGTAAGTTTTGAAGTTACGCAAGGTCCTAAGGGCAAGCAAGCTTCAAACATCCAAGCTGCTTAA
GCF_000145255.1_WP_013294174.1	MATGTVKWFNDAKGFGFITPDDGSEDLFAHFSAINMSGFKSLKEGQKVSFDVVKGPKGNQASNIQAA	ATGGCAACTGGTACAGTTAAATGGTTTAACGATGCAAAGGGTTTCGGTTTTATTACGCCTGATGATGGTAGCGAAGACCTGTTTGCACACTTCTCCGCAATCAATATGAGCGGTTTTAAGTCCCTCAAGGAAGGCCAGAAGGTTTCATTCGATGTGGTTAAAGGCCCTAAGGGGAATCAAGCTTCCAATATTCAGGCAGCTTAA
GCF_000146165.2_WP_011071803.1	MSKTTGVVKWFNEDKGFGFISPDNGGADAFVHFRAIVSDGFKTLAEGQKVSYEVEQGQKGPQAANVVVL	ATGTCTAAAACTACTGGCGTAGTAAAATGGTTTAACGAAGACAAAGGTTTTGGTTTTATTTCCCCTGATAACGGTGGCGCTGACGCATTCGTTCACTTCCGCGCAATCGTATCTGATGGCTTTAAAACCCTTGCTGAAGGTCAAAAGGTTTCTTACGAAGTCGAACAAGGCCAAAAAGGTCCTCAAGCTGCGAACGTAGTTGTTCTGTAA
GCF_000146165.2_WP_011072576.1	MASGTVKWFNNAKGFGFICPDQGGEDVFAHYSTIEMEGYRTLKAGQPVQFEVEQGPKGMHASAISPTK	ATGGCAAGCGGAACTGTTAAATGGTTCAACAACGCCAAAGGATTCGGGTTTATTTGCCCTGATCAAGGTGGCGAGGACGTTTTTGCACACTATTCTACCATTGAAATGGAAGGCTATAGAACTCTAAAAGCAGGCCAACCCGTTCAATTTGAAGTAGAACAAGGTCCAAAAGGAATGCACGCTTCAGCCATTTCACCAACAAAATAA
GCF_000147055.1_WP_009113827.1	MSKIKGSVKWFNESKGFGFITPEDGSKDVFVHFSAIQSNGFKTLAEGQRVEFEITSGAKGPSAANVIAI	ATGTCTAAGATTAAAGGTAGCGTTAAGTGGTTTAATGAGTCCAAAGGATTCGGTTTCATTACTCCGGAAGATGGCAGCAAGGACGTATTCGTTCACTTCTCTGCTATCCAGAGCAACGGTTTCAAAACCCTGGCTGAAGGTCAGCGCGTAGAGTTTGAAATCACCAGCGGCGCTAAAGGACCTTCTGCTGCTAACGTTATCGCTATTTAA
GCF_000147055.1_WP_012769694.1	MAKIKGQVKWFNESKGFGFITPADGSKDVFVHFSAIQGNGFKTLAEGQNVEFEIQDGQKGPSAVNVVAL	ATGGCAAAGATTAAAGGTCAGGTTAAGTGGTTCAACGAGTCTAAAGGCTTCGGTTTCATCACTCCGGCTGATGGCAGCAAAGACGTGTTCGTACACTTCTCTGCAATTCAGGGTAACGGCTTTAAAACTTTAGCCGAAGGCCAGAATGTTGAGTTTGAAATTCAGGATGGCCAGAAAGGTCCTTCTGCAGTGAACGTTGTTGCGCTGTAA
GCF_000147055.1_WP_012770072.1	METGTVKWFNNAKGFGFICPESGGEDIFAHYSTIQMDGYRTLKAGQVVQFTVHQGPKGNHASLIVPVAGETVA	ATGGAGACAGGTACTGTTAAATGGTTCAATAACGCCAAAGGCTTTGGCTTTATTTGTCCCGAGAGCGGTGGTGAAGATATCTTCGCCCACTATTCAACTATTCAGATGGACGGCTACAGGACGCTGAAAGCAGGCCAGGTGGTGCAATTCACCGTGCACCAGGGGCCGAAAGGAAACCACGCCAGTCTGATCGTGCCGGTAGCCGGCGAAACGGTCGCCTGA
GCF_000147055.1_WP_013319797.1	MSNKMTGSVKWFNETKGFGFITPADGSKDVFVHFSAIQSDSFKTLYEGQKVEFVIGNGPKGPSAENVVGL	ATGTCTAATAAAATGACTGGTTCAGTAAAATGGTTTAACGAAACTAAAGGTTTTGGTTTCATCACTCCGGCTGACGGCAGCAAAGACGTGTTTGTTCATTTCTCTGCCATTCAGAGCGATAGCTTCAAGACTCTGTACGAAGGTCAGAAAGTTGAATTCGTTATCGGCAACGGTCCGAAAGGTCCTTCCGCTGAAAACGTAGTAGGGCTGTAA
GCF_000148645.1_WP_013345137.1	MSKATGTVKWFNEDKGFGFITQDNGGADVFVHFRAIQGDGFKTLAEGQQVSFDIEQGPKGPQAANVTKI	ATGTCCAAAGCAACTGGTACCGTGAAGTGGTTCAACGAAGACAAAGGCTTCGGCTTCATCACTCAAGACAACGGCGGCGCTGACGTATTCGTACACTTCCGTGCCATTCAGGGTGACGGTTTCAAAACTCTGGCTGAAGGTCAGCAGGTATCTTTCGATATCGAGCAAGGCCCGAAAGGCCCGCAAGCGGCTAACGTAACCAAGATCTAA
GCF_000148645.1_WP_013345498.1	MAQGTVKWFNNAKGFGFICPEGGGEDVFAHYSTIEMEGYRTLKAGQVVEFEMEAGPKGMHASNIQPVNK	ATGGCTCAAGGAACGGTTAAGTGGTTCAACAATGCAAAAGGCTTTGGTTTCATTTGTCCCGAAGGGGGCGGTGAAGATGTCTTTGCGCATTATTCAACCATTGAGATGGAAGGCTATCGTACGCTGAAGGCGGGCCAGGTTGTTGAGTTTGAGATGGAAGCAGGCCCCAAGGGTATGCACGCCTCCAACATTCAACCGGTCAACAAGTAA
GCF_000157355.2_WP_003126918.1	METGTVKWFNSDKGFGFITAENGNDVFVHFSAIQGEGFKTLEEGQAVTFDIEDGQRGPQATNVNKA	ATGGAAACAGGTACAGTTAAATGGTTTAACTCAGACAAAGGTTTTGGATTCATCACTGCAGAAAACGGTAACGATGTATTCGTTCATTTCTCAGCTATCCAAGGCGAAGGCTTCAAAACTTTAGAAGAAGGTCAAGCAGTGACTTTCGATATCGAAGACGGACAACGTGGCCCTCAAGCGACTAACGTTAACAAAGCGTAA
GCF_000157355.2_WP_005225155.1	MEQGTVKWFNAEKGFGFISREDGTDVFVHFSAIQGEGFKTLEEGQAVTFDVEDSDRGPQAVNVNKA	ATGGAACAAGGTACAGTAAAATGGTTCAATGCTGAAAAAGGGTTTGGTTTTATCTCTCGCGAAGACGGTACAGACGTATTTGTACACTTTTCAGCGATCCAAGGTGAAGGATTCAAAACTTTAGAAGAAGGTCAAGCAGTAACTTTCGACGTGGAAGATTCTGATCGTGGACCTCAAGCAGTTAACGTAAACAAAGCGTAA
GCF_000157355.2_WP_005229578.1	MEHGKVKWFNNEKGFGFITVDGGDDVFVHFSAIQGDGFKSLEEGQEVEFTIVEGARGPQAAEVTKV	ATGGAACATGGGAAAGTAAAATGGTTCAACAACGAAAAAGGGTTTGGTTTTATTACAGTTGACGGTGGCGATGATGTATTTGTTCACTTCTCTGCCATTCAAGGAGATGGGTTTAAATCGCTTGAAGAAGGACAAGAAGTTGAATTTACGATCGTTGAAGGTGCCCGCGGACCGCAGGCAGCGGAAGTAACCAAAGTCTAA
GCF_000163895.2_WP_014262643.1	MKQGKVKWFNAEKGFGFISVEGENDVFVHFSAIQTEGFKTLEEGQDVEFEIVDGARGPQASNVTKL	ATGAAACAAGGAAAAGTAAAATGGTTTAATGCAGAAAAAGGATTTGGATTTATTTCAGTAGAAGGCGAAAATGATGTTTTCGTTCATTTTTCTGCAATCCAAACAGAAGGATTCAAAACTCTTGAAGAAGGACAAGATGTTGAGTTTGAAATCGTTGACGGAGCAAGAGGACCTCAAGCTTCTAATGTAACAAAACTATAA
GCF_000177235.2_WP_013486925.1	MTGKVKWFNSEKGFGFIEREGGDDVFVHFSAIQGEGFKTLEEGQEVEFEIVDGDRGPQAANVVKL	ATGACTGGCAAAGTAAAATGGTTTAATTCAGAAAAAGGATTTGGATTTATCGAGCGTGAAGGTGGAGACGACGTATTTGTACACTTCTCTGCAATTCAAGGGGAAGGCTTCAAAACATTAGAAGAAGGCCAAGAGGTTGAATTCGAAATCGTTGATGGCGATCGTGGTCCACAAGCTGCTAACGTAGTAAAACTTTAA
GCF_000177235.2_WP_013487267.1	MQQGTVKWFNAEKGFGFIEVEGGDDVFVHFSAIQGEGFKSLDEGQAVTFDVEQGQRGPQATNVNKA	ATGCAACAAGGTACAGTAAAATGGTTTAACGCAGAAAAAGGTTTCGGATTTATCGAAGTTGAAGGTGGAGACGATGTATTCGTACATTTCTCAGCTATCCAAGGCGAAGGATTTAAATCTTTAGACGAAGGTCAAGCAGTAACTTTTGACGTAGAGCAAGGTCAACGCGGACCACAAGCTACTAACGTTAACAAAGCATAA
GCF_000177235.2_WP_013488896.1	MEQGKVKWFNAEKGFGFIEVEGGDDVFVHFSAINGEGFKTLEEGQDVSFEVEQGQRGPQATNVNKL	ATGGAACAAGGTAAAGTAAAATGGTTTAATGCAGAAAAAGGTTTTGGATTCATCGAAGTTGAAGGTGGAGACGATGTATTCGTACACTTCTCAGCTATCAATGGTGAAGGTTTCAAAACATTAGAAGAAGGTCAAGACGTTTCTTTCGAAGTAGAGCAAGGACAACGCGGACCACAAGCTACTAACGTTAACAAACTATAA
GCF_000177235.2_WP_013490247.1	MEQGKVKWFNSEKGFGFIEREDGDDVFVHFSAIQGEGFKTLDEGQEVTFEIEEGQRGPQATNVNKV	ATGGAACAAGGTAAAGTAAAATGGTTTAACAGTGAAAAAGGTTTTGGATTTATTGAAAGAGAAGATGGAGACGATGTTTTCGTTCACTTCTCAGCTATTCAAGGAGAAGGCTTTAAGACCCTTGATGAAGGACAAGAGGTTACGTTTGAGATTGAAGAAGGACAACGTGGCCCGCAAGCTACAAACGTAAACAAAGTGTAA
GCF_000177235.2_WP_041809164.1	MQGKVKWFNAEKGFGFIEREGGDDVFVHFSAIEQEGFKTLEEGQEVEFEIVEGARGPQASNVVKL	ATGCAAGGAAAAGTGAAATGGTTTAACGCAGAAAAAGGATTTGGCTTTATCGAGCGCGAAGGTGGAGACGACGTATTCGTACATTTCTCTGCTATTGAGCAAGAAGGTTTCAAAACTCTTGAAGAAGGACAAGAAGTTGAGTTTGAAATTGTTGAAGGTGCTCGTGGACCACAAGCCTCTAACGTAGTTAAGCTGTAA
GCF_000178835.2_WP_013655645.1	MTGKVKWFNAEKGFGFIEREGGDDVFVHFTAIQGDGFKTLEEGQEVNFDIVEGNRGPQAANVTKA	ATGACAGGTAAAGTTAAATGGTTTAACGCAGAAAAAGGTTTTGGATTTATCGAAAGAGAAGGTGGAGATGATGTATTCGTACACTTCACAGCTATCCAAGGCGACGGTTTCAAAACATTAGAAGAAGGTCAAGAAGTTAACTTCGATATCGTTGAAGGTAACAGAGGACCACAAGCTGCTAACGTTACAAAAGCATAG
GCF_000178835.2_WP_242825805.1	MMTGTVKWFNAEKGFGFIAREDGDDVFVHFSAIQGDGYKTLEEGQKVNFEITQGNRGAQAENVTRA	ATAATGACAGGTACAGTTAAATGGTTCAACGCAGAAAAAGGTTTTGGTTTCATCGCTAGAGAAGATGGAGATGATGTATTCGTACATTTCTCAGCTATCCAAGGTGACGGATACAAAACTCTTGAAGAAGGTCAAAAAGTTAACTTTGAAATTACTCAAGGTAACCGTGGCGCTCAAGCAGAAAACGTTACAAGAGCTTAA
GCF_000178875.2_WP_006080998.1	MSKTTGVVKWFNEDKGFGFISPDNGGADAFVHFRAIVSEGFKTLAEGQKVSFDIEQGQKGPQAANVVIL	ATGTCTAAAACTACTGGTGTAGTTAAATGGTTTAACGAAGATAAAGGTTTTGGTTTTATTTCTCCTGACAATGGTGGCGCTGACGCATTCGTTCATTTCCGCGCAATCGTTTCAGAAGGCTTTAAAACTCTTGCTGAAGGTCAAAAGGTTTCTTTTGATATCGAACAAGGCCAAAAAGGTCCTCAAGCTGCGAACGTAGTTATTCTGTAA
GCF_000178875.2_WP_006081937.1	MASGTVKWFNNAKGFGFICPDQGGEDVFAHYSTIEMEGYRTLKAGQPVQFEVEAGPKGMHASAISPTK	ATGGCAAGCGGAACTGTTAAATGGTTCAACAACGCCAAAGGATTCGGGTTTATTTGCCCTGATCAAGGTGGTGAGGACGTTTTTGCACACTATTCTACCATTGAAATGGAAGGCTATCGAACTCTAAAAGCAGGCCAACCCGTTCAATTTGAAGTAGAAGCCGGTCCAAAAGGGATGCACGCTTCAGCCATTTCACCAACAAAATAA
GCF_000185985.2_WP_013516763.1	MAKIKGQVKWFNESKGFGFITPSDGSKDVFVHFSAIQGNGFKTLSEGQNVEFEIQDGHKGPSAVNVTTI	ATGGCGAAAATTAAAGGTCAAGTAAAATGGTTTAATGAATCTAAAGGGTTTGGTTTTATTACACCTTCTGATGGAAGTAAAGATGTGTTTGTTCATTTTTCTGCAATTCAAGGAAATGGGTTTAAGACCTTATCTGAAGGTCAAAATGTTGAATTTGAAATTCAAGATGGGCATAAAGGACCTTCCGCGGTTAATGTAACAACTATATAA
GCF_000196035.1_NP_464889.1	MEQGTVKWFNAEKGFGFIERENGDDVFVHFSAIQGDGFKSLDEGQAVTFDVEEGQRGPQAANVQKA	ATGGAACAAGGTACAGTAAAATGGTTTAACGCAGAAAAAGGATTTGGTTTTATCGAACGCGAAAACGGTGACGATGTATTCGTACATTTCAGCGCTATCCAAGGCGACGGATTCAAATCTTTAGACGAAGGTCAAGCAGTAACTTTCGACGTTGAAGAAGGCCAACGCGGACCTCAAGCAGCTAACGTTCAAAAAGCGTAA
GCF_000196035.1_NP_465403.1	MQNGKVKWFNNEKGYGFIESDGGEDIFVHFTAIQGDGYKSLEEGQAVTFEVVEGNRGAQAANVEKA	ATGCAAAATGGGAAAGTAAAATGGTTTAACAATGAAAAGGGTTACGGTTTTATCGAATCAGACGGCGGCGAAGATATTTTCGTTCACTTCACAGCGATCCAAGGTGACGGCTACAAATCTTTAGAAGAAGGCCAAGCGGTAACATTTGAAGTAGTTGAAGGTAATCGCGGCGCTCAAGCAGCTAACGTAGAAAAAGCCTAA
GCF_000196035.1_NP_465540.1	MQTGTVKWFNSEKGFGFIEVEGGDDVFVHFSAIEGEGFKTLDEGQSVEFEIVEGQRGPQAEKVTKL	ATGCAAACAGGTACAGTTAAATGGTTTAACAGTGAAAAAGGCTTCGGTTTCATCGAAGTAGAAGGCGGAGACGATGTATTCGTACACTTCAGCGCTATCGAAGGTGAAGGATTCAAAACTTTAGACGAAGGTCAAAGCGTTGAATTTGAAATCGTTGAAGGCCAACGTGGCCCACAAGCAGAAAAAGTTACTAAACTTTAA
GCF_000196095.1_WP_005456215.1	MATGTVKWFNNAKGFGFICSDEEEGDIFAHYSTIQMDGYRTLKAGQQVSYEIEKGPKGCHASSVVPIEAQAK	ATGGCTACAGGTACAGTAAAGTGGTTTAACAATGCCAAAGGATTTGGGTTTATCTGTTCAGACGAAGAGGAAGGAGACATCTTTGCCCACTACTCAACTATCCAAATGGACGGTTATCGTACACTGAAAGCAGGCCAACAAGTCTCTTACGAGATTGAAAAAGGTCCAAAGGGTTGCCACGCAAGTAGCGTTGTGCCAATTGAAGCCCAAGCCAAGTAA
GCF_000196155.1_WP_011145889.1	METGTVKWFNNAKGFGFICPASGGEDIFAHYSTIQMDGYRTLKAGQKVNFSVHLGPKGNHASIIVPLENEPKG	ATGGAGACAGGTACTGTTAAGTGGTTCAATAATGCTAAGGGTTTTGGGTTTATTTGCCCGGCAAGCGGCGGAGAAGATATATTCGCTCATTACTCAACCATTCAGATGGACGGTTACCGGACGCTGAAAGCGGGCCAAAAGGTGAATTTCAGCGTTCACCTAGGACCAAAGGGAAATCATGCCAGTATTATTGTTCCTCTTGAAAACGAACCCAAAGGCTAA
GCF_000196155.1_WP_011146114.1	MSDKMKGQVKWFNESKGFGFITPADGSKDVFVHFSAIQGNGFKTLAEGQNVEFTIENGAKGPAAANVMAI	ATGTCTGACAAAATGAAAGGTCAAGTGAAGTGGTTCAACGAGTCTAAAGGCTTCGGTTTCATCACCCCAGCTGACGGTAGCAAAGACGTATTCGTTCACTTCTCTGCCATTCAGGGTAACGGTTTCAAAACTTTGGCAGAAGGCCAGAACGTAGAATTCACCATTGAAAATGGTGCGAAAGGTCCAGCTGCAGCAAACGTAATGGCTATCTGA
GCF_000196155.1_WP_011147003.1	MAKITGTVKWFNESKGFGFITPADGSKDVFVHFSAIQSEGFKTLAEGQKVEFEIQDGQKGPSAANVTAA	ATGGCAAAAATCACTGGTACTGTAAAGTGGTTCAACGAATCTAAAGGTTTTGGTTTTATTACTCCAGCTGATGGTAGCAAAGATGTGTTTGTACATTTTAGCGCTATTCAGAGCGAGGGTTTTAAAACTTTGGCCGAAGGTCAAAAAGTTGAGTTTGAAATTCAGGACGGTCAGAAAGGTCCTTCAGCAGCAAACGTTACAGCAGCATAA
GCF_000196155.1_WP_011147931.1	MSSSMTGSVKWFNNDKGFGFISPKDGSKDVFVHYSAIQSNNFKTLEEGQEVSFSIENGAKGPSAVNVIVLS	ATGTCTAGTTCAATGACTGGTTCAGTAAAATGGTTTAACAACGATAAAGGTTTTGGCTTTATTTCCCCAAAAGATGGTAGCAAAGATGTTTTCGTTCATTATTCTGCAATTCAGAGTAATAATTTCAAAACATTGGAAGAAGGTCAGGAAGTCTCATTCTCTATTGAGAATGGCGCTAAAGGCCCATCTGCGGTAAATGTTATCGTATTATCTTAA
GCF_000196155.1_WP_041379980.1	MSKIKGNVKWFNESKGFGFITPEDGSKDVFVHFSAIQITGFKTLAEGQKVEFEITDGAKGPSAVNVVAI	ATGTCAAAAATTAAAGGTAACGTTAAGTGGTTTAATGAATCTAAAGGATTCGGGTTTATCACTCCAGAAGATGGTAGCAAAGACGTATTCGTGCATTTCTCTGCTATTCAGATTACCGGATTTAAAACTTTGGCAGAAGGTCAAAAAGTAGAGTTTGAAATCACTGACGGCGCTAAAGGTCCATCTGCTGTAAACGTTGTCGCTATCTGA
GCF_000196355.1_WP_011381544.1	MATGTVKWFNDSKGFGFITPDDGSEDLFAHFSAINMSGFKTLKEGQKVTFEVTQGPKGKQASNIQSA	ATGGCAACTGGTACAGTAAAATGGTTCAATGATTCAAAGGGTTTTGGCTTCATTACACCCGATGATGGAAGCGAGGATTTATTCGCGCACTTCTCCGCAATCAATATGTCCGGATTTAAAACTCTCAAAGAAGGTCAAAAAGTAACGTTTGAGGTTACCCAGGGTCCGAAGGGCAAGCAAGCATCAAATATTCAGTCTGCTTAA
GCF_000196455.1_WP_013362474.1	MVGKVKWFNAEKGFGFIEREDGDDVFVHFSAIQGDGFKTLEEGQTVEFEITQGNRGPQASNVVRG	ATGGTAGGTAAAGTAAAATGGTTTAACGCAGAAAAAGGTTTTGGATTCATCGAGAGAGAAGATGGAGACGATGTATTCGTACATTTCTCAGCTATTCAAGGAGACGGATTTAAGACATTAGAAGAAGGACAAACTGTAGAGTTCGAAATAACTCAAGGAAACAGAGGACCTCAAGCATCTAACGTTGTAAGAGGATAG
GCF_000196475.1_WP_012777203.1	MSNAMTGSVKWFNNDKGFGFISPKNGSKDVFVHYSAIQSNNFKTLEEGQEVSFSIENGAKGPSAVNVIVLS	ATGTCTAATGCAATGACTGGTTCAGTAAAATGGTTTAATAACGATAAAGGCTTTGGATTTATTTCTCCAAAAAATGGTAGCAAAGATGTTTTTGTCCATTATTCTGCAATTCAGAGCAATAATTTCAAAACACTGGAAGAAGGTCAGGAAGTTTCATTCTCTATTGAGAATGGTGCTAAAGGTCCATCAGCAGTAAATGTGATCGTATTATCCTGA
GCF_000196475.1_WP_015833897.1	MAKITGTVKWFNESKGFGFITPADGSKDVFVHFSAIQSDGFKTLAEGQKVEFEIQDGQKGPSAANVTTA	ATGGCAAAAATCACTGGTACTGTAAAGTGGTTCAACGAATCTAAAGGTTTTGGTTTTATTACTCCAGCTGATGGCAGCAAAGATGTGTTTGTACATTTTAGCGCTATTCAGAGCGATGGTTTTAAAACCTTGGCGGAAGGTCAAAAAGTTGAGTTTGAAATTCAGGATGGCCAGAAAGGTCCTTCTGCGGCAAATGTCACCACAGCGTAA
GCF_000196475.1_WP_015834829.1	MSDKMKGQVKWFNESKGFGFITPADGSKDVFVHFSAIQGNGFKTLAEGQNVEFTIESGAKGPAAANVTAI	ATGTCTGACAAAATGAAAGGTCAAGTGAAGTGGTTCAACGAGTCTAAAGGCTTCGGTTTCATCACCCCAGCTGACGGTAGCAAAGACGTATTCGTTCACTTCTCTGCCATTCAGGGTAACGGTTTCAAAACTTTGGCAGAAGGCCAGAACGTAGAATTCACCATTGAAAGTGGTGCTAAAGGCCCAGCGGCAGCAAATGTAACTGCTATCTGA
GCF_000196475.1_WP_015834982.1	METGTVKWFNNAKGFGFICPASGGEDIFAHYSTIQMDGYRTLKAGQKVHFSVHQGPKGNHASIIVPLENDPKG	ATGGAGACAGGTACTGTTAAGTGGTTCAATAATGCTAAGGGCTTTGGGTTTATTTGCCCGGCAAGCGGCGGAGAGGATATCTTTGCCCATTACTCAACCATTCAGATGGACGGTTACCGGACGCTGAAAGCGGGCCAAAAGGTGCATTTCAGCGTTCACCAAGGCCCAAAGGGAAATCATGCCAGCATTATTGTTCCTCTTGAAAACGACCCCAAAGGCTAA
GCF_000196475.1_WP_021323071.1	MSKIKGNVKWFNESKGFGFITPEDGSKDVFVHFSAIQSNGFKTLAEGQKVEFEITDGAKGPSAVNVVAI	ATGTCAAAAATTAAAGGTAACGTTAAGTGGTTTAATGAATCTAAAGGATTCGGGTTTATCACTCCAGAAGATGGTAGCAAAGACGTATTCGTGCATTTCTCTGCTATTCAGAGTAACGGATTTAAAACTCTGGCAGAAGGCCAAAAGGTAGAGTTTGAAATCACTGACGGCGCTAAAGGTCCATCTGCTGTAAACGTTGTCGCTATCTGA
GCF_000196495.1_WP_012548956.1	MSKTTGIVKWFNEEKGFGFITQDNGGADVFVHFRAIASEGFKTLKEGQKVSFEVEQGQKGPQASNVVGE	ATGTCTAAAACAACTGGTATCGTTAAGTGGTTTAACGAAGAGAAAGGTTTCGGCTTCATTACTCAAGATAACGGCGGCGCTGACGTATTCGTTCACTTCCGTGCAATCGCATCTGAAGGTTTTAAAACTCTGAAAGAAGGCCAAAAGGTTTCTTTCGAAGTTGAACAAGGTCAAAAAGGCCCACAAGCTAGCAACGTTGTTGGCGAATAA
GCF_000196495.1_WP_012550728.1	MAIGTVKWFNNAKGFGFICPEGEDGDIFAHYSTIEMDGYRTLKAGQAVTYEIHEGPKGYHASEIKPLEGEAVK	ATGGCAATAGGCACAGTAAAATGGTTCAATAACGCCAAAGGGTTTGGCTTCATTTGTCCAGAAGGTGAGGATGGTGATATTTTTGCTCATTACTCAACAATCGAGATGGATGGCTACCGTACATTAAAAGCAGGACAAGCTGTCACCTACGAAATTCATGAAGGCCCTAAAGGCTATCATGCAAGCGAAATTAAACCGCTTGAAGGTGAAGCTGTAAAATAG
GCF_000196495.1_WP_012552262.1	MSKTTGIVKWFNEEKGFGFITQDNGGADVFVHFRAIASEGFKTLAEGQKVSFEVEQGQKGPQAANVVAA	ATGTCTAAAACAACTGGTATCGTTAAATGGTTTAACGAAGAGAAAGGTTTCGGTTTTATCACTCAAGATAACGGCGGCGCTGACGTATTCGTACATTTCCGTGCTATCGCTTCAGAGGGTTTCAAAACTCTTGCTGAAGGCCAAAAAGTTTCTTTTGAAGTTGAGCAAGGCCAAAAAGGCCCACAAGCTGCGAACGTTGTAGCTGCTTAA
GCF_000196615.1_WP_001062678.1	MAKIKGQVKWFNESKGFGFITPADGSKDVFVHFSAIQGNGFKTLAEGQNVEFEIQDGQKGPAAVNVTAI	ATGGCAAAGATTAAAGGTCAGGTTAAGTGGTTCAACGAGTCTAAAGGTTTTGGTTTCATCACCCCTGCAGACGGCAGCAAAGACGTGTTCGTACACTTCTCTGCAATCCAGGGTAATGGCTTCAAAACTCTGGCTGAAGGCCAGAACGTTGAGTTCGAAATCCAGGACGGCCAGAAAGGCCCTGCTGCAGTGAACGTCACCGCTATCTAA
GCF_000196615.1_WP_004156612.1	MSKIKGSVKWFNESKGFGFITPEDGSKDVFVHFSAIQSNGFKTLAEGQRVEFEITNGAKGPSAANVAAI	ATGTCTAAGATTAAAGGTAGCGTTAAGTGGTTTAATGAGTCCAAAGGATTCGGTTTCATTACTCCTGAAGATGGTAGCAAAGACGTGTTCGTACACTTCTCTGCCATCCAGAGCAATGGTTTCAAAACTCTGGCTGAAGGTCAGCGCGTAGAGTTCGAAATCACCAACGGTGCCAAAGGCCCATCTGCTGCTAACGTTGCCGCTATTTAA
GCF_000196615.1_WP_013200976.1	MSNKMTGLVKWFNAEKGFGFISPTDGSKDVFVHFSAIQNGGFKTLEEGQKVEFSIENGQKGPAAANVTAL	ATGTCTAACAAAATGACTGGTTTAGTAAAATGGTTCAACGCTGAGAAAGGTTTCGGCTTCATCTCCCCAACCGACGGCAGCAAAGACGTATTCGTTCACTTCTCTGCAATCCAGAACGGCGGCTTCAAGACGCTGGAAGAAGGTCAGAAAGTTGAGTTCTCTATCGAAAACGGCCAGAAAGGCCCAGCAGCTGCTAACGTAACTGCTCTGTAA
GCF_000196615.1_WP_013201507.1	METGTVKWFNNAKGFGFICPVSGGEDIFAHYSTIKMDGYRTLKAGQQVQFDVHEGPKGNHASLIVPVEMAMAVSA	ATGGAGACGGGTACTGTTAAATGGTTCAATAATGCCAAAGGCTTCGGCTTTATCTGTCCAGTCAGTGGCGGCGAGGATATCTTCGCGCACTACTCGACCATCAAGATGGATGGATACAGAACGCTGAAAGCCGGGCAACAAGTCCAGTTTGATGTGCATGAGGGACCGAAGGGCAATCATGCCAGCCTCATTGTCCCTGTGGAAATGGCGATGGCAGTCAGTGCCTGA
GCF_000196615.1_WP_013204302.1	MSNKMTGLVKWFNSDKGFGFISPEDGSKDVFVHFSAIQSNDFKTLDEGQKVEFTIENGAKGPSAGNVVAL	ATGTCTAACAAAATGACTGGTTTAGTAAAATGGTTCAACTCTGACAAAGGCTTCGGCTTCATTTCTCCAGAAGACGGCAGCAAAGATGTATTCGTACATTTCTCTGCAATCCAGAGCAACGATTTCAAAACTTTAGATGAAGGCCAGAAAGTAGAGTTCACTATCGAGAACGGTGCTAAAGGTCCATCAGCTGGCAACGTAGTTGCTCTGTAA
GCF_000196615.1_WP_013204444.1	MSDSMTGLVKWFNADKGFGFISPQDGSKDVFVHFSAIQSNDFKTLDEGQTVQFSVENGAKGPSAVNVIPM	ATGTCTGATTCAATGACTGGTTTAGTAAAATGGTTTAACGCTGATAAAGGTTTTGGCTTTATTTCTCCACAGGATGGCAGCAAGGATGTGTTCGTACACTTCTCCGCCATTCAGAGCAATGATTTCAAAACCCTGGATGAAGGTCAGACAGTGCAATTCTCCGTGGAGAATGGTGCCAAAGGCCCGTCAGCGGTAAATGTCATACCGATGTAA
GCF_000198775.1_WP_013434901.1	METGTVKWFNDAKGFGFITPDGGGEDLFAHFSEIRMDGFKSLQENQKVTYEVKMGPKGKQAANIRAA	ATGGAAACCGGAACCGTCAAGTGGTTCAACGACGCCAAAGGTTTTGGCTTCATTACGCCGGACGGCGGTGGTGAAGACCTGTTTGCGCATTTCTCCGAAATTCGCATGGATGGCTTTAAGTCCCTCCAGGAAAACCAAAAGGTCACGTACGAAGTGAAGATGGGCCCGAAGGGCAAGCAAGCGGCGAATATTCGCGCGGCATAA
GCF_000198775.1_WP_041753073.1	MATGTVKWFNDAKGYGFITPDEGGEDLFAHFSAIQMNGFKTLKEGQKVSFEVVQGPKGKQASNIQAAA	ATGGCGACTGGTACGGTCAAATGGTTCAATGACGCCAAAGGTTACGGATTCATCACGCCGGACGAAGGCGGTGAGGATTTGTTCGCGCATTTTTCGGCTATCCAGATGAACGGCTTCAAGACCCTCAAGGAAGGACAGAAGGTCAGCTTCGAAGTCGTGCAAGGACCGAAAGGCAAACAGGCTTCGAATATCCAGGCGGCAGCCTGA
GCF_000213655.1_WP_013784394.1	MAIGKVKWFNNAKGFGFIVPEDGGEDIFAHYSTIQMEGYRSLKAGQEVTYDVQQGPKGLHAENIGFKEEPER	ATGGCGATTGGCAAAGTTAAATGGTTTAACAACGCGAAAGGATTTGGTTTTATTGTACCTGAAGATGGTGGTGAAGATATTTTCGCACACTACTCAACTATCCAAATGGAAGGATATCGCTCACTTAAAGCTGGTCAAGAAGTCACGTATGACGTGCAACAGGGCCCTAAAGGCCTACACGCCGAAAACATAGGCTTTAAAGAAGAACCAGAGCGTTAA
GCF_000213655.1_WP_013786252.1	MSKVTGTVKWFNADKGYGFLTQDNGGKDVFVHFRAIVSDGYKTLPEGQRVEFEVEEGQKGLQAANVHAI	ATGTCTAAAGTTACAGGCACCGTTAAGTGGTTTAACGCTGATAAAGGTTATGGTTTTCTAACTCAAGATAACGGCGGTAAGGACGTATTCGTTCATTTCCGTGCTATCGTTTCTGACGGTTACAAAACTCTTCCAGAAGGTCAGCGCGTGGAATTTGAAGTAGAAGAAGGTCAAAAAGGTCTTCAAGCTGCTAACGTGCACGCCATCTAA
GCF_000214235.1_WP_002210315.1	MSKIKGSVKWFNESKGFGFITPEDGSKDVFVHFSAIASNGFKTLAEGQRVEFEITNGAKGPSAANVIAI	ATGTCTAAGATTAAAGGTAGCGTTAAGTGGTTTAATGAATCCAAAGGCTTCGGCTTCATTACTCCGGAAGATGGTAGCAAGGACGTTTTCGTTCACTTCTCTGCCATCGCTAGCAATGGTTTCAAAACTCTTGCTGAAGGCCAGCGTGTAGAATTTGAAATCACGAACGGTGCCAAAGGGCCATCTGCTGCTAACGTTATCGCTATCTAA
GCF_000214235.1_WP_002221949.1	MAKIKGQVKWFNESKGFGFITPADGSKDVFVHFSAIQGNGFKTLAEGQNVEFEIQDGQKGPSAVNVTAI	ATGGCAAAGATCAAAGGTCAAGTTAAGTGGTTCAACGAGTCTAAAGGTTTCGGTTTCATCACCCCAGCTGACGGCAGCAAAGACGTGTTCGTACACTTCTCTGCAATCCAGGGTAACGGCTTCAAAACCCTGGCTGAAGGCCAGAACGTTGAGTTCGAAATCCAAGATGGCCAGAAAGGCCCATCTGCAGTGAACGTTACTGCTATCTAA
GCF_000214235.1_WP_004942590.1	METGTVKWFNNAKGFGFICPEGGGEDIFAHYSTIKMDGYRTLKAGQQVSFDVHQGPKGNHASLIVPLESEALA	ATGGAGACGGGTACTGTTAAATGGTTCAACAACGCCAAAGGGTTTGGGTTTATCTGTCCTGAAGGCGGCGGCGAAGACATATTCGCCCATTATTCAACGATTAAAATGGATGGGTACAGGACACTAAAAGCCGGCCAACAGGTCAGTTTTGACGTGCACCAAGGGCCAAAAGGGAACCATGCGAGTCTTATTGTGCCGCTGGAAAGCGAGGCACTGGCCTAA
GCF_000214235.1_WP_004942663.1	MSKKTGQVKWFNESKGFGFIEQNDGGKDVFVHFSAIATDGFKTLAEGQRVEYSIQDSPRGPAAANVVAL	ATGTCTAAGAAAACGGGTCAGGTTAAATGGTTCAACGAAAGCAAAGGTTTTGGTTTCATTGAGCAAAACGACGGTGGTAAAGATGTATTCGTACATTTTTCTGCAATCGCGACCGACGGTTTCAAAACTCTGGCTGAAGGCCAGCGTGTTGAGTATAGCATCCAGGACAGCCCGCGCGGGCCGGCTGCCGCCAACGTTGTTGCTCTGTAA
GCF_000214235.1_WP_004943356.1	MSTKMTGLVKWFDAGKGFGFISPADGSKDVFVHFSAIQSNDFKTLDEGQRVEFTIESGAKGPSAGNVVVL	ATGTCTACTAAAATGACTGGTTTGGTAAAATGGTTTGATGCAGGTAAAGGTTTTGGTTTCATCTCTCCGGCAGACGGCAGCAAAGACGTGTTCGTGCACTTCTCTGCCATTCAGAGCAATGATTTCAAAACTCTTGATGAAGGCCAGCGCGTTGAGTTCACCATCGAAAGTGGTGCAAAAGGCCCTTCAGCAGGCAACGTAGTGGTTTTATGA
GCF_000214235.1_WP_004946278.1	MSNMIKGQVKWFNESKGFGFITPADGSKDVFVHFSAIQDQGFKTLAEGQNVQFSIENGAKGPSAANVTAI	ATGTCTAACATGATCAAAGGTCAAGTGAAGTGGTTCAACGAGTCTAAAGGTTTTGGTTTCATCACTCCAGCAGACGGCAGCAAAGACGTGTTCGTACACTTCTCTGCTATCCAGGATCAAGGCTTCAAGACCCTGGCTGAAGGCCAGAACGTACAGTTCTCTATCGAGAACGGTGCTAAAGGTCCGTCAGCGGCTAACGTTACCGCTATCTAA
GCF_000214235.1_WP_004952373.1	MSTKMTGLVKWFNADKGFGFITPQDGSKDVFVHFSAIQSSDFKTLDEGQKVEFSVESGAKGPSAVNVIAL	ATGTCTACTAAAATGACTGGTTTAGTAAAATGGTTTAACGCAGATAAAGGCTTCGGTTTTATCACTCCACAAGATGGCAGTAAAGATGTATTCGTACATTTCTCCGCTATCCAGAGCAGCGATTTTAAAACCTTAGACGAAGGTCAGAAAGTGGAGTTCTCTGTTGAGAGCGGCGCTAAAGGCCCTTCTGCTGTAAACGTTATCGCGCTTTAA
GCF_000215085.1_WP_013841611.1	MQGKVKWFNANKGYGFIESESGSDVFVHYSAIQTDGYRTLEEGQPVEFEIVEGSRGPQAANVTKI	TTGCAAGGTAAAGTTAAATGGTTTAATGCCAATAAGGGGTATGGCTTCATTGAGTCCGAGTCCGGCTCGGATGTCTTTGTTCACTACTCTGCCATTCAAACGGACGGTTACCGCACTTTAGAGGAAGGGCAACCGGTGGAATTTGAGATTGTAGAGGGGAGCCGGGGCCCGCAAGCGGCTAATGTAACAAAAATATAA
GCF_000215105.1_WP_013837341.1	MATGTVKWFNAEKGYGFIAPEDGSADVFAHFSAIQSSGYRTLEENQRVEFDVTQGPKGPQAESIRPL	ATGGCCACCGGAACCGTGAAGTGGTTCAACGCCGAGAAGGGTTACGGCTTCATCGCCCCCGAGGACGGCTCCGCCGACGTTTTCGCGCACTTCTCCGCCATCCAGTCGAGCGGCTACCGCACGCTCGAGGAGAACCAGCGCGTCGAGTTCGACGTGACGCAGGGCCCGAAGGGCCCGCAGGCGGAGAGCATCCGCCCGCTCTGA
GCF_000219915.2_WP_014751120.1	MSETTETSVPEEGGNKQTGTVKWFNDAKGFGFITPDGGGEDLFAHFSSIQMNGFKTLKEGQRVTFEIAQGPKGQQALNIMAA	ATGTCAGAAACAACAGAAACATCAGTCCCGGAAGAAGGCGGTAACAAACAGACCGGGACCGTGAAATGGTTTAACGACGCCAAAGGATTCGGTTTCATTACACCCGATGGCGGCGGCGAAGACCTTTTTGCCCACTTTTCTTCCATCCAAATGAATGGATTCAAAACACTCAAAGAAGGTCAGCGCGTTACTTTCGAGATTGCACAAGGTCCAAAAGGGCAACAGGCACTTAATATAATGGCAGCATAG
GCF_000222975.1_WP_002210052.1	MSNKMTGLVKWFDAGKGFGFITPADGSKDVFVHFSAIQSNDFKTLDEGQNVEFSIENGAKGPAAVNVIAL	ATGTCTAATAAAATGACTGGTTTAGTAAAATGGTTTGACGCTGGTAAAGGTTTTGGTTTCATCACTCCGGCTGATGGCAGCAAAGATGTGTTCGTTCACTTCTCTGCTATCCAGAGCAATGATTTCAAAACCCTGGATGAAGGCCAAAATGTGGAGTTCTCTATCGAGAACGGCGCTAAAGGCCCTGCAGCGGTAAACGTTATTGCGCTGTAA
GCF_000222975.1_WP_002210053.1	MSNKMTGLVKWFDAGKGFGFITPADGSKDVFVHFSAIQSNDFKTLDEGQNVEFSIENGAKGPSAVNVIAL	ATGTCTAATAAAATGACTGGTTTAGTAAAATGGTTTGACGCTGGTAAAGGTTTTGGTTTCATCACTCCGGCCGATGGCAGCAAAGATGTGTTCGTTCACTTCTCTGCTATCCAGAGCAATGATTTTAAAACCCTGGATGAAGGCCAAAATGTGGAGTTCTCTATCGAGAACGGCGCTAAAGGCCCCTCAGCAGTAAACGTAATCGCCCTGTAA
GCF_000222975.1_WP_002210315.1	MSKIKGSVKWFNESKGFGFITPEDGSKDVFVHFSAIASNGFKTLAEGQRVEFEITNGAKGPSAANVIAI	ATGTCTAAGATTAAAGGTAGCGTTAAGTGGTTCAATGAATCCAAAGGTTTCGGCTTCATTACCCCAGAAGATGGTAGCAAGGACGTTTTTGTTCATTTTTCTGCCATCGCTAGCAATGGTTTCAAAACGCTTGCTGAAGGCCAGCGTGTAGAATTTGAAATCACGAACGGTGCCAAAGGGCCATCTGCTGCTAATGTTATCGCTATCTAA
GCF_000222975.1_WP_002210893.1	MSNMMKGQVKWFNESKGFGFITPADGSKDVFVHFSAIQDQGFKTLAEGQNVQFSIENGAKGPSAANVTAI	ATGTCTAACATGATGAAAGGTCAAGTAAAGTGGTTCAACGAGTCTAAAGGCTTCGGTTTCATCACTCCAGCTGATGGCAGCAAAGACGTGTTCGTTCACTTCTCTGCTATCCAAGATCAAGGCTTCAAGACCCTGGCTGAAGGCCAGAATGTACAGTTCTCTATCGAGAACGGTGCTAAAGGTCCGTCTGCAGCAAACGTAACTGCAATCTAA
GCF_000222975.1_WP_002211350.1	METGTVKWFNNAKGFGFICPEGGGEDIFAHYSTIQMDGYRTLKAGQIVNFDVHEGPKGNHASLIVPLELNSVPPLDGVSPPELAILA	ATGGAGACGGGTACTGTTAAATGGTTCAACAACGCCAAAGGTTTTGGCTTTATTTGCCCTGAGGGCGGTGGCGAAGACATTTTCGCTCACTATTCAACTATCCAGATGGATGGTTACCGAACATTAAAAGCCGGCCAAATAGTTAACTTTGATGTTCATGAAGGCCCCAAAGGGAACCATGCTAGCCTGATTGTTCCGCTAGAGTTAAATAGTGTACCACCGTTAGACGGTGTATCACCGCCGGAACTCGCTATACTGGCCTGA
GCF_000222975.1_WP_002212220.1	MSNKMTGLVKWFDAGKGFGFISPADGSKDVFVHFSAIQGNDYKTLDEGQNVEFSIEQGQKGPSAVNVVAL	ATGTCTAATAAAATGACTGGTTTGGTAAAATGGTTTGATGCTGGTAAAGGTTTTGGTTTTATTTCTCCTGCAGATGGCAGCAAAGATGTATTTGTACATTTCTCTGCAATCCAGGGTAATGACTACAAAACTCTTGATGAAGGCCAGAACGTTGAGTTCAGCATCGAGCAAGGCCAAAAAGGCCCTTCAGCTGTAAACGTTGTAGCACTGTAA
GCF_000222975.1_WP_002221949.1	MAKIKGQVKWFNESKGFGFITPADGSKDVFVHFSAIQGNGFKTLAEGQNVEFEIQDGQKGPSAVNVTAI	ATGGCAAAGATCAAAGGTCAAGTTAAGTGGTTCAACGAGTCTAAAGGCTTCGGTTTCATCACTCCAGCAGATGGCAGCAAAGATGTGTTTGTACACTTCTCTGCAATCCAAGGTAATGGCTTCAAAACCTTGGCTGAAGGCCAGAATGTAGAGTTCGAAATCCAAGACGGTCAGAAAGGTCCGTCTGCAGTAAACGTTACTGCAATCTAA
GCF_000224675.1_WP_000034825.1	MSKIKGNVKWFNESKGFGFITPEDGSKDVFVHFSAIQTNGFKTLAEGQRVEFEITNGAKGPSAANVIAL	ATGTCTAAGATTAAAGGTAACGTTAAGTGGTTTAATGAGTCCAAAGGATTCGGTTTCATTACTCCAGAAGATGGCAGCAAAGACGTGTTCGTACACTTCTCTGCAATCCAGACTAATGGTTTCAAAACCCTGGCTGAAGGTCAGCGCGTTGAGTTTGAAATCACTAACGGTGCCAAAGGCCCTTCTGCTGCTAACGTAATCGCTCTGTAA
GCF_000224675.1_WP_001062678.1	MAKIKGQVKWFNESKGFGFITPADGSKDVFVHFSAIQGNGFKTLAEGQNVEFEIQDGQKGPAAVNVTAI	ATGGCAAAGATTAAAGGTCAAGTTAAGTGGTTCAACGAGTCTAAAGGTTTTGGTTTCATTACTCCTGCTGACGGCAGCAAAGATGTGTTCGTACACTTCTCTGCAATCCAGGGTAACGGCTTCAAAACTCTGGCTGAAGGCCAGAACGTTGAGTTCGAAATTCAGGACGGCCAGAAAGGCCCAGCTGCAGTTAACGTAACTGCTATCTGA
GCF_000224675.1_WP_003860775.1	MSAKMTGLVKWFNADKGFGFITPDDGSKDVFVHFSAIQNDGYKSLDEGQKVSFTIESGAKGPAAGNVVSL	ATGTCTGCTAAAATGACTGGTCTGGTAAAATGGTTCAACGCTGATAAAGGTTTCGGTTTCATCACTCCTGATGATGGCTCTAAAGACGTGTTCGTACACTTCTCTGCTATCCAGAACGATGGCTACAAATCTCTGGACGAAGGTCAGAAAGTTTCCTTCACCATCGAAAGCGGCGCTAAAGGCCCAGCAGCTGGTAACGTTGTAAGCCTGTAA
GCF_000224675.1_WP_014069558.1	MEMGTVKWFNNAKGFGFICPEGGGEDIFAHYSTIQMDGYRTLKAGQSVRFDVHQGPKGNHASVIVPIEAEVVA	ATGGAAATGGGTACTGTTAAGTGGTTCAACAACGCCAAAGGGTTTGGGTTTATCTGCCCCGAAGGCGGCGGCGAGGATATCTTCGCTCACTATTCCACCATTCAGATGGATGGTTACAGAACGCTCAAAGCCGGACAATCGGTTCGGTTCGATGTACACCAGGGGCCGAAGGGCAATCATGCCAGCGTCATCGTGCCCATCGAAGCAGAAGTTGTTGCTTAG
GCF_000226565.1_WP_014109107.1	MAVGKVKWFNNAKGFGFIVPEDGGEDIFAHYSTIKMDGYRSLKAGQEVTYEVQQGPKGLHAENIGLNGEEPER	ATGGCAGTCGGCAAAGTTAAATGGTTTAACAATGCTAAGGGATTCGGATTCATCGTACCAGAAGACGGCGGCGAAGATATTTTTGCGCATTATTCGACAATTAAAATGGATGGATATCGTTCTCTCAAAGCGGGCCAAGAAGTGACTTATGAAGTCCAACAAGGTCCAAAAGGTTTACATGCAGAAAATATCGGTTTGAATGGCGAAGAGCCTGAAAGATAA
GCF_000227705.2_WP_015254327.1	MKGTVKWFNAEKGYGFIQVEDGDDVFVHFSAIQGEGFKTLDEGQLVEFEITQGNRGPQAANVIKL	TTGAAAGGTACGGTAAAATGGTTTAACGCTGAGAAGGGTTACGGCTTCATTCAAGTCGAAGACGGCGACGACGTGTTCGTCCACTTCTCGGCCATTCAGGGTGAAGGGTTCAAGACGCTGGACGAAGGCCAGCTCGTCGAATTCGAAATCACTCAGGGCAATCGCGGACCGCAAGCGGCCAACGTCATCAAGTTATAA
GCF_000227705.2_WP_213484821.1	MMQGRVKWFNAEKGYGFIETEEGGDVFVHFSAIQAEGFKTLEEGQAVEFDIVQGARGPQAANVVKLS	TTGATGCAAGGAAGAGTAAAGTGGTTTAACGCGGAAAAAGGCTATGGATTCATCGAGACGGAGGAAGGCGGCGACGTATTCGTTCACTTCTCCGCGATCCAGGCCGAAGGTTTCAAGACGCTCGAGGAAGGCCAAGCCGTCGAGTTCGACATCGTTCAAGGCGCACGCGGTCCACAAGCAGCCAACGTCGTTAAGCTGTCCTAA
GCF_000233595.1_WP_001062678.1	MAKIKGQVKWFNESKGFGFITPADGSKDVFVHFSAIQGNGFKTLAEGQNVEFEIQDGQKGPAAVNVTAI	ATGGCAAAGATTAAAGGTCAGGTTAAGTGGTTCAACGAGTCTAAAGGCTTCGGTTTTATCACTCCAGCTGACGGTAGCAAAGATGTATTCGTACACTTCTCTGCTATTCAGGGCAACGGCTTCAAAACGCTGGCCGAAGGCCAAAACGTTGAGTTCGAAATTCAGGACGGCCAGAAAGGCCCAGCAGCGGTTAACGTTACTGCTATCTGA
GCF_000233595.1_WP_006118399.1	MSKIKGNVKWFNESKGFGFITPEDGSKDVFVHFSAIQSNGFKTLAEGQRVEFEITDGAKGPSAANVISL	ATGTCTAAGATTAAAGGTAACGTTAAGTGGTTTAATGAATCTAAAGGATTCGGTTTCATTACTCCTGAAGATGGCAGCAAAGATGTATTCGTACACTTCTCTGCGATCCAGAGCAATGGCTTCAAAACTCTGGCTGAAGGTCAGCGTGTAGAGTTTGAAATCACTGACGGCGCAAAAGGCCCATCTGCTGCTAACGTTATCAGTCTGTAA
GCF_000233595.1_WP_006118603.1	METGTVKWFNNAKGFGFICPIGGGEDIFAHYSTIQMDGYRTLKAGQQVHFDVHQGPKGNHASLIVPVEAQQAVA	ATGGAGACAGGTACCGTTAAATGGTTCAATAACGCCAAAGGTTTCGGCTTTATCTGTCCAATCGGGGGCGGAGAAGATATCTTCGCACACTACTCAACGATACAGATGGATGGCTACAGAACGCTAAAGGCGGGCCAGCAGGTCCATTTTGACGTTCATCAGGGCCCTAAGGGCAACCATGCCAGTCTGATAGTACCCGTTGAAGCGCAACAGGCTGTCGCCTGA
GCF_000233595.1_WP_009091867.1	MSNKIRGTVKWFNAEKGFGFISPQDGSKDVFVHFSAIQGTDFRSLDEGQQVEFTVENGAKGPAAANVVGL	ATGTCTAACAAAATCCGCGGTACCGTTAAATGGTTCAACGCTGAGAAAGGCTTCGGTTTCATCTCTCCTCAGGACGGCAGCAAAGATGTATTCGTACACTTCTCTGCAATTCAGGGCACAGATTTCCGTTCATTAGATGAAGGTCAACAAGTTGAGTTTACAGTAGAAAATGGTGCCAAAGGCCCAGCTGCTGCGAACGTTGTTGGTCTCTAA
GCF_000233595.1_WP_014606872.1	MSTKMTGLVKWFNADKGFGFISPQDGSKDVFVHFSAIQSSDFKTLDEGQKVEFSIENGPKGPSAGNVVAL	ATGTCAACTAAAATGACTGGTTTAGTAAAATGGTTTAACGCTGATAAAGGCTTCGGCTTTATTTCTCCTCAGGACGGCAGCAAAGATGTATTCGTACATTTCTCTGCTATTCAGAGCAGCGATTTCAAAACATTAGATGAAGGCCAGAAAGTGGAGTTCTCAATCGAGAACGGCCCTAAAGGTCCTTCAGCTGGCAATGTTGTTGCTCTGTAA
GCF_000233715.2_WP_006524652.1	MEGKVKWFNADKGFGFIETSEGNDVFVHFSAIQGEGFKTLDEGQSVTFDVVEGNRGPQAANVQK	ATGGAAGGCAAAGTTAAATGGTTTAATGCCGATAAAGGTTTCGGTTTTATTGAAACAAGCGAAGGTAACGATGTGTTCGTGCACTTTTCCGCAATCCAGGGTGAAGGCTTTAAGACCCTTGATGAAGGTCAGAGTGTAACTTTTGACGTAGTTGAAGGTAATCGTGGTCCTCAGGCTGCAAATGTTCAAAAGTAA
GCF_000233715.2_WP_220427557.1	MTTGLFFRRNVLVLGKVKWFNKDKGYGFIEREDGGDVFVHFSAIQEDGFKTLLEGQEVEFDIVEGARGPQAANVVKL	ATGACCACGGGATTATTTTTTAGGAGGAATGTTTTAGTGTTAGGTAAGGTCAAGTGGTTTAACAAGGACAAGGGTTACGGCTTTATTGAAAGGGAAGACGGAGGCGACGTTTTCGTACACTTCTCTGCCATTCAAGAGGATGGTTTTAAAACCCTGCTGGAAGGCCAGGAAGTGGAATTCGATATAGTTGAGGGCGCCCGTGGTCCGCAAGCTGCCAATGTAGTTAAATTATAA
GCF_000235585.1_WP_010348936.1	MKGTVKWFNAEKGYGFIQVDGGEDVFVHFSAIQGDGFKTLEEGQAVEFEITEGNRGPQAANVNKL	TTGAAAGGTACAGTAAAATGGTTTAACGCAGAAAAAGGTTATGGCTTCATCCAAGTGGATGGTGGCGAGGACGTATTCGTACATTTCTCCGCAATCCAAGGCGACGGCTTCAAGACTTTGGAAGAAGGTCAAGCGGTTGAATTCGAAATCACTGAAGGTAACCGTGGACCCCAAGCAGCTAACGTAAATAAACTGTAA
GCF_000235585.1_WP_013308356.1	MQTGTVKWFNAEKGFGFIEVEGGSDVFVHFSAIQGDGFKSLDEGQRVEFNVVEGNRGPQAENVVKL	ATGCAAACAGGTACAGTTAAATGGTTTAACGCAGAAAAAGGTTTTGGTTTCATCGAGGTTGAAGGTGGAAGCGACGTATTCGTACATTTCTCCGCAATCCAAGGCGACGGCTTCAAATCTTTGGACGAAGGCCAACGCGTAGAATTCAACGTAGTTGAAGGAAACCGTGGACCACAAGCTGAGAACGTTGTAAAACTGTAA
GCF_000235585.1_WP_013373372.1	MQGKVKWFNAEKGYGFIETADGGDVFVHFSAIQTEGFKTLEEGQDVEFDIVEGARGPQAANVTKL	ATGCAAGGTAAAGTAAAATGGTTTAACGCAGAAAAAGGTTATGGTTTCATTGAAACTGCTGATGGCGGCGACGTATTCGTTCATTTTTCCGCAATTCAAACAGAAGGCTTCAAAACACTTGAAGAAGGACAAGACGTGGAGTTCGACATTGTCGAAGGCGCACGTGGACCACAAGCCGCTAACGTAACCAAATTATAA
GCF_000236665.1_WP_014235134.1	MATGTVKWFNDAKGFGFITPDDGSEDLFAHFSAINMNGFKTLKEGEKVSFDVTQGPKGKQASNIQKA	ATGGCAACTGGTACCGTCAAATGGTTTAACGACGCCAAGGGTTTTGGTTTCATTACCCCCGATGATGGCAGCGAAGATCTGTTCGCTCATTTCTCCGCCATCAACATGAATGGCTTTAAGACCCTGAAGGAAGGCGAGAAGGTCAGCTTCGACGTCACCCAAGGTCCTAAGGGCAAGCAAGCGTCCAACATCCAGAAGGCTTAA
GCF_000236925.1_WP_000809131.1	MKQGTVKWFNAEKGFGFIEVEGENDVFVHFSAINQDGYKSLEEGQAVEFEVVEGDRGPQAANVVKL	ATGAAACAAGGTACAGTTAAATGGTTTAACGCTGAAAAAGGATTCGGCTTTATCGAAGTTGAAGGAGAAAATGACGTATTCGTACATTTTTCAGCAATTAACCAAGATGGTTACAAATCTTTAGAAGAAGGTCAAGCTGTTGAGTTTGAAGTAGTTGAAGGCGACCGCGGTCCTCAAGCTGCAAACGTTGTTAAACTATAA
GCF_000237305.1_WP_014141998.1	MATGIVRWFNDAKGFGLIIPDDGGEDLFAHFSEIRTDGFKSLQENQKVEYEVKSGPKGLQAANIRPL	ATGGCAACAGGCATCGTCCGATGGTTCAACGACGCCAAGGGCTTCGGGCTGATCATCCCCGACGACGGCGGCGAAGACCTCTTCGCCCACTTCTCGGAGATCAGGACCGACGGGTTCAAGTCCCTTCAGGAGAACCAGAAGGTCGAGTACGAGGTGAAGTCCGGCCCCAAGGGCCTCCAGGCCGCGAACATCAGACCGCTGTAA
GCF_000238255.3_WP_010559282.1	MSNKVEGVVKWFDESKGFGFISQNDGGKDVFVHFRAIQSEGFKTLAEGQAVSFEVEDGQKGLQAANVVVL	ATGTCTAACAAAGTAGAAGGCGTTGTAAAATGGTTTGACGAGTCAAAAGGTTTTGGCTTTATTTCACAAAACGACGGCGGCAAAGACGTATTCGTACATTTCCGTGCAATCCAGTCAGAAGGTTTCAAAACTCTTGCTGAAGGTCAAGCGGTTTCTTTCGAAGTTGAAGACGGTCAAAAAGGTCTTCAAGCTGCGAACGTTGTAGTACTTTAA
GCF_000238255.3_WP_010560186.1	MACGKVKWFNNAKGFGFIVEEGSTEDIFAHFSTIQMDGYKTLKAGQDVTFELQQGPKGLHATNIAPTEGEV	ATGGCTTGCGGAAAAGTCAAATGGTTCAATAACGCAAAAGGGTTTGGGTTTATCGTAGAAGAAGGCAGCACGGAGGATATCTTTGCGCATTTTTCAACCATTCAAATGGATGGATACAAAACACTTAAAGCTGGCCAAGATGTAACATTTGAGTTGCAACAAGGTCCGAAAGGCCTACACGCGACCAATATTGCGCCAACTGAAGGCGAAGTCTAA
GCF_000238395.3_WP_002962500.1	MACGKVKWFNNAKGFGFIVEDGCENDIFAHYSTIVMDGYKTLKAGQDVTFELEQGPKGLHAKNIAPDGDIIE	ATGGCTTGCGGTAAAGTTAAATGGTTCAACAACGCTAAAGGTTTTGGTTTCATCGTAGAAGACGGCTGCGAGAATGATATTTTCGCTCATTACTCAACAATTGTAATGGACGGTTATAAAACGCTTAAAGCTGGTCAAGATGTAACATTCGAATTAGAACAAGGACCTAAAGGTCTACACGCTAAAAATATTGCCCCAGATGGTGACATTATTGAGTGA
GCF_000240185.1_YP_005225795.1	MSKIKGNVKWFNESKGFGFITPEDGSKDVFVHFSAIQSNGFKTLAEGQRVEFEITNGAKGPSAANVIAL	ATGTCTAAGATTAAAGGTAACGTTAAGTGGTTTAATGAGTCCAAAGGATTCGGTTTCATTACTCCGGAAGATGGCAGCAAAGATGTATTCGTACACTTCTCTGCAATCCAGTCCAACGGTTTCAAAACTCTGGCTGAAGGTCAGCGCGTAGAGTTCGAAATCACTAACGGTGCCAAAGGCCCTTCTGCTGCAAACGTCATCGCTCTGTAA
GCF_000240185.1_YP_005226091.1	MEMGTVKWFNNAKGFGFICPEGGGEDIFAHYSTIQMDGYRTLKAGQAVRFDVHQGPKGNHASVIVPVEAETAA	ATGGAAATGGGTACTGTTAAGTGGTTCAACAATGCCAAAGGGTTCGGTTTTATCTGCCCTGAGGGCGGCGGCGAAGACATTTTCGCCCATTACTCCACCATCCAGATGGATGGTTACAGAACGCTAAAAGCCGGACAAGCCGTTCGGTTTGATGTTCACCAGGGGCCAAAAGGCAATCACGCCAGCGTGATCGTCCCTGTGGAAGCGGAAACGGCTGCATAA
GCF_000240185.1_YP_005227654.1	MAKIKGQVKWFNESKGFGFITPADGSKDVFVHFSAIQGNGFKTLAEGQNVEFEIQDGQKGPAAVNVTAI	ATGGCAAAGATTAAAGGTCAAGTTAAGTGGTTCAACGAGTCTAAAGGTTTTGGTTTCATTACTCCGGCTGATGGCAGCAAAGACGTGTTCGTACACTTCTCCGCTATCCAGGGTAACGGCTTCAAAACTCTGGCTGAAGGCCAGAACGTTGAGTTCGAAATTCAGGACGGCCAGAAAGGTCCGGCTGCAGTTAACGTAACTGCTATCTGA
GCF_000240185.1_YP_005229378.1	MSGKMTGIVKWFNADKGFGFITPDDGSKDVFVHFSAIQNDGYKSLDEGQKVSFTIESGAKGPAAGNVTSL	ATGTCCGGTAAAATGACTGGTATCGTAAAATGGTTCAACGCTGACAAAGGCTTCGGCTTCATCACTCCTGACGATGGCTCTAAAGACGTGTTCGTACACTTCTCTGCTATCCAGAACGATGGCTACAAATCCCTGGACGAAGGTCAGAAAGTATCCTTCACCATCGAAAGCGGCGCTAAAGGCCCGGCAGCTGGCAACGTAACTTCTCTGTAA
GCF_000247565.1_WP_011069981.1	MSKIKGNVKWFNESKGFGFITPEDGSKDVFVHFSAIQSNGFKTLAEGQRVEFEITNGAKGPSAAHVTTI	ATGTCTAAAATTAAAGGTAATGTGAAATGGTTTAATGAATCAAAAGGATTTGGATTTATTACTCCAGAAGATGGAAGTAAAGACGTATTTGTACATTTTTCTGCAATTCAAAGCAATGGCTTTAAGACTCTTGCAGAAGGGCAACGTGTAGAATTTGAAATCACTAATGGAGCCAAAGGACCATCGGCTGCTCATGTGACTACGATTTAA
GCF_000255295.1_WP_014393434.1	MATGTVKWFNDAKGFGFITQDGGGEDVFCHHSAINMDGFRTLQEGQKVEFEVTRGPKGLQAQNVRAVG	ATGGCTACTGGTACGGTGAAGTGGTTCAACGATGCGAAGGGCTTTGGCTTCATCACTCAGGACGGCGGTGGTGAGGACGTGTTCTGCCACCACAGCGCCATCAACATGGACGGCTTCCGCACCTTGCAGGAAGGTCAGAAGGTGGAGTTCGAGGTGACGCGCGGCCCCAAGGGCCTGCAGGCGCAGAACGTCCGCGCAGTGGGTTGA
GCF_000258535.2_WP_013913932.1	MQGKVKWFNAEKGYGFIEREDGGDVFVHFSAIQTEGFKTLEEGQSVEFDIVEGARGPQAANVIKL	ATGCAAGGTAAAGTAAAATGGTTTAACGCAGAAAAAGGCTATGGCTTCATCGAGCGCGAAGACGGCGGCGACGTATTCGTACACTTCTCCGCGATTCAAACAGAAGGCTTCAAGACTTTGGAAGAAGGCCAGTCTGTTGAATTCGACATCGTAGAAGGCGCTCGCGGTCCTCAAGCGGCTAACGTAATCAAGCTGTAA
GCF_000258535.2_WP_013915310.1	MKGTVKWFNAEKGYGFISVDGGDDVFVHFSAIQGEGFKTLEEGQSVEFEIVQGNRGPQAANVHKL	TTGAAGGGTACAGTAAAATGGTTTAACGCAGAAAAAGGTTACGGCTTCATCTCTGTTGACGGTGGCGACGATGTATTCGTACACTTCTCCGCTATCCAAGGCGAAGGCTTCAAGACGCTGGAAGAAGGCCAATCGGTTGAGTTCGAAATCGTTCAAGGCAACCGCGGTCCACAAGCAGCTAACGTTCACAAACTGTAA
GCF_000258535.2_WP_013916011.1	METGTVKWFNAEKGFGFIEREGGNDVFVHFSAIQGEGFKSLDEGQRVEFNVVQGNRGPQAENVVKVY	ATGGAAACAGGAACAGTGAAATGGTTTAACGCAGAGAAGGGCTTCGGCTTTATCGAAAGAGAAGGCGGAAATGACGTATTCGTTCATTTCTCGGCGATCCAGGGTGAAGGCTTCAAATCCCTCGACGAAGGCCAGCGCGTGGAGTTCAACGTGGTTCAAGGCAACCGCGGACCGCAAGCGGAGAACGTTGTTAAAGTATACTAA
GCF_000258535.2_WP_014372710.1	MQTGTVKWFNAEKGFGFIEVEGGSDVFVHFSAIQGDGFKTLDEGQRVEFNVVQGNRGPQAENVVKL	ATGCAAACAGGTACAGTGAAATGGTTCAACGCAGAAAAAGGTTTCGGCTTCATCGAAGTTGAAGGCGGCAGCGACGTATTCGTACACTTCTCCGCAATCCAAGGCGACGGCTTCAAAACCCTCGACGAAGGTCAGCGCGTAGAGTTCAACGTAGTTCAAGGCAACCGTGGTCCACAAGCTGAGAACGTTGTAAAGCTGTAA
GCF_000258535.2_WP_014649098.1	METGTVKWFNAEKGFGFIEVEGGKDVFVHFSAIQGEGYKSLDEGQRVQFDVVQGNRGPQAENVVKL	ATGGAAACAGGAACAGTGAAATGGTTTAATGCGGAAAAAGGATTTGGCTTCATCGAAGTGGAAGGCGGCAAAGACGTATTCGTTCACTTCAGCGCCATTCAAGGAGAAGGCTACAAATCCCTGGACGAAGGCCAGCGCGTACAGTTCGATGTGGTTCAAGGCAACCGCGGACCACAAGCCGAGAATGTAGTCAAGCTGTAA
GCF_000261045.2_WP_002210315.1	MSKIKGSVKWFNESKGFGFITPEDGSKDVFVHFSAIASNGFKTLAEGQRVEFEITNGAKGPSAANVIAI	ATGTCTAAGATTAAAGGTAGCGTTAAGTGGTTTAATGAATCCAAAGGCTTCGGCTTCATTACTCCGGAAGATGGTAGCAAGGACGTTTTCGTTCACTTCTCTGCCATCGCTAGCAATGGTTTCAAAACTCTTGCTGAAGGCCAGCGTGTAGAATTTGAAATCACGAACGGTGCCAAAGGGCCATCTGCTGCTAACGTTATCGCTATCTAA
GCF_000261045.2_WP_002221949.1	MAKIKGQVKWFNESKGFGFITPADGSKDVFVHFSAIQGNGFKTLAEGQNVEFEIQDGQKGPSAVNVTAI	ATGGCAAAGATCAAAGGTCAAGTTAAGTGGTTCAACGAGTCTAAAGGTTTCGGTTTCATCACCCCAGCTGACGGCAGCAAAGACGTGTTCGTACACTTCTCTGCAATCCAGGGTAACGGCTTCAAAACCCTGGCTGAAGGCCAGAACGTTGAGTTCGAAATCCAAGATGGCCAGAAAGGCCCATCTGCAGTAAACGTTACTGCTATCTAA
GCF_000261045.2_WP_004942590.1	METGTVKWFNNAKGFGFICPEGGGEDIFAHYSTIKMDGYRTLKAGQQVSFDVHQGPKGNHASLIVPLESEALA	ATGGAGACGGGTACTGTTAAATGGTTCAACAACGCCAAAGGGTTTGGTTTTATCTGTCCTGAAGGCGGCGGCGAAGACATATTCGCCCATTATTCAACGATTAAGATGGATGGGTACAGGACACTGAAAGCCGGCCAACAGGTCAGTTTTGACGTGCACCAAGGGCCAAAAGGGAACCATGCGAGTCTTATTGTGCCACTGGAAAGCGAGGCACTGGCCTAA
GCF_000261045.2_WP_004942663.1	MSKKTGQVKWFNESKGFGFIEQNDGGKDVFVHFSAIATDGFKTLAEGQRVEYSIQDSPRGPAAANVVAL	ATGTCTAAGAAGACGGGTCAGGTGAAGTGGTTCAACGAAAGCAAAGGTTTTGGTTTCATTGAGCAGAACGACGGCGGTAAAGATGTATTCGTACATTTCTCTGCAATCGCGACCGACGGTTTCAAAACCCTGGCTGAAGGCCAGCGTGTTGAGTATAGCATCCAGGACAGCCCGCGCGGGCCGGCTGCCGCCAACGTTGTTGCTCTGTAA
GCF_000261045.2_WP_004943356.1	MSTKMTGLVKWFDAGKGFGFISPADGSKDVFVHFSAIQSNDFKTLDEGQRVEFTIESGAKGPSAGNVVVL	ATGTCTACTAAAATGACTGGTTTGGTAAAATGGTTTGATGCGGGTAAAGGCTTTGGTTTTATCTCTCCTGCAGACGGCAGCAAAGACGTGTTCGTACACTTCTCTGCCATTCAGAGCAATGATTTCAAAACTCTTGATGAAGGCCAGCGCGTTGAGTTCACCATCGAAAGTGGTGCAAAAGGCCCTTCAGCAGGCAACGTAGTAGTTTTATAA
GCF_000261045.2_WP_004946278.1	MSNMIKGQVKWFNESKGFGFITPADGSKDVFVHFSAIQDQGFKTLAEGQNVQFSIENGAKGPSAANVTAI	ATGTCTAACATGATCAAAGGTCAAGTGAAGTGGTTCAACGAGTCTAAAGGTTTTGGTTTCATCACTCCAGCAGACGGCAGCAAAGATGTGTTCGTACACTTCTCTGCTATCCAGGATCAAGGCTTCAAGACCCTGGCTGAAGGCCAGAACGTACAGTTCTCTATCGAGAACGGTGCTAAAGGTCCGTCAGCGGCTAACGTTACCGCTATCTAA
GCF_000261045.2_WP_004952373.1	MSTKMTGLVKWFNADKGFGFITPQDGSKDVFVHFSAIQSSDFKTLDEGQKVEFSVESGAKGPSAVNVIAL	ATGTCTACTAAAATGACTGGTTTAGTAAAATGGTTCAACGCAGATAAAGGCTTCGGTTTTATCACTCCGCAAGATGGCAGCAAAGATGTATTCGTACATTTCTCCGCAATCCAGAGCAGCGATTTTAAAACCTTAGACGAAGGCCAAAAAGTGGAGTTCTCTGTTGAGAGCGGCGCTAAAGGCCCTTCTGCTGTAAACGTTATCGCGCTTTAA
GCF_000262305.1_WP_001062678.1	MAKIKGQVKWFNESKGFGFITPADGSKDVFVHFSAIQGNGFKTLAEGQNVEFEIQDGQKGPAAVNVTAI	ATGGCAAAGATTAAAGGTCAAGTTAAGTGGTTCAACGAATCCAAAGGTTTTGGCTTCATTACTCCGGCTGACGGCAGCAAAGACGTGTTCGTACACTTCTCTGCAATCCAGGGTAACGGCTTCAAAACTCTGGCTGAAGGCCAGAACGTTGAATTCGAAATCCAGGACGGCCAGAAAGGTCCGGCTGCTGTTAACGTAACAGCTATCTGA
GCF_000262305.1_WP_002439184.1	MSKIKGNVKWFNESKGFGFITPEDGSKDVFVHFSAIQSNGFKTLAEGQRVEFEITNGAKGPSAANVIAL	ATGTCTAAGATTAAAGGTAACGTTAAGTGGTTTAATGAGTCCAAAGGATTCGGTTTCATTACTCCGGAAGATGGCAGCAAAGACGTGTTCGTACACTTCTCTGCAATCCAGAGCAATGGTTTCAAAACTCTGGCTGAAGGTCAGCGTGTAGAGTTCGAAATCACTAACGGTGCCAAAGGCCCTTCTGCTGCTAACGTAATCGCTCTGTAA
GCF_000262305.1_WP_002439508.1	METGTVKWFNNAKGFGFICPEGGGEDIFAHYSTIQMDGYRTLKAGQTVRFDVHQGPKGNHASVIVPIHNEEIAA	ATGGAGACGGGTACTGTTAAATGGTTCAATAACGCCAAAGGGTTTGGGTTTATCTGTCCCGAAGGCGGCGGCGAAGACATCTTCGCACATTATTCAACCATCCAGATGGATGGTTACAGAACACTCAAAGCCGGTCAGACTGTCAGATTCGATGTACACCAGGGCCCGAAAGGCAACCACGCCAGTGTCATCGTACCGATTCACAATGAAGAAATTGCCGCATAA
GCF_000262305.1_WP_002443702.1	MSDKMTGLVKWFNADKGFGFISPADGSKDVFVHFSAIQSDNFRTLEEGQKVEFTIENGAKGPAAANVVAL	ATGTCTGACAAAATGACTGGTTTAGTAAAATGGTTCAACGCTGATAAAGGCTTTGGTTTTATCTCTCCGGCTGACGGCAGCAAAGATGTATTCGTACACTTCTCTGCTATCCAGAGCGATAACTTCCGTACCCTGGAAGAAGGCCAGAAAGTTGAATTCACCATTGAAAATGGTGCTAAAGGCCCGGCTGCAGCCAACGTTGTTGCGCTGTAA
GCF_000262305.1_WP_002444499.1	MSRRMTGIVKSFDILSGKGLIIPSDGRKDVLLHISAVKPGESELLTPGIRIEFCRVNGLRGPVAANIYVS	TTGTCCCGCAGAATGACAGGAATCGTCAAAAGTTTTGACATCCTCAGTGGTAAAGGTCTCATCATCCCTTCTGATGGTCGTAAAGATGTTCTGTTACATATTTCAGCCGTTAAGCCCGGCGAATCAGAATTACTCACCCCTGGTATCCGTATCGAATTTTGCCGAGTCAACGGTCTGCGCGGCCCGGTGGCTGCAAATATCTATGTATCCTGA
GCF_000264765.2_WP_004094893.1	MAKIKGQVKWFNEAKGFGFITPADGSKDVFVHFSAIQGNGFKTLAEGQHVEFEIQDGQKGPSAVNVTAI	ATGGCTAAGATCAAAGGTCAAGTGAAGTGGTTCAACGAAGCGAAGGGTTTCGGTTTCATCACCCCGGCTGACGGCAGCAAGGACGTGTTCGTTCACTTCTCTGCAATCCAGGGCAACGGTTTCAAAACTCTGGCTGAAGGTCAGCACGTAGAGTTCGAAATCCAGGATGGCCAGAAAGGCCCGTCTGCTGTTAACGTAACTGCTATCTAA
GCF_000264765.2_WP_005296986.1	MSKKTGQVKWFNESKGFGFIEQHDGGKDVFVHFSAITGDGFKTLAEGQRVEYTIQDSPRGPAAANVVAL	ATGTCTAAGAAGACTGGTCAGGTAAAGTGGTTCAACGAAAGCAAAGGCTTCGGCTTTATCGAGCAGCATGACGGCGGTAAAGATGTATTCGTACATTTCTCTGCCATCACCGGTGACGGTTTCAAAACGTTGGCTGAAGGCCAGCGTGTAGAGTACACCATTCAGGACAGCCCGCGCGGGCCGGCTGCCGCCAACGTTGTTGCGCTGTAA
GCF_000264765.2_WP_034162491.1	METGTVKWFNNAKGFGFICPASGGDDIFAHYTAIQMEGYRTLKAGQQVQFDLHIGPKGNHANTIIPILSEPAS	ATGGAGACGGGTACCGTAAAGTGGTTTAATAACGCCAAAGGCTTTGGCTTTATCTGTCCGGCCAGCGGCGGCGACGATATATTCGCCCATTACACCGCCATTCAGATGGAGGGATATCGCACGCTGAAGGCGGGTCAACAGGTTCAGTTTGACCTTCATATCGGCCCCAAGGGTAATCACGCCAACACCATAATCCCCATTCTCAGCGAGCCGGCGTCCTAA
GCF_000264765.2_WP_034163349.1	MSKKTGQVKWFNESKGFGFITPADGSKDVFVHFSAIQSEGFKTLAEGQQVEFSIQDSQRGPAAADVVAL	ATGAGCAAGAAAACCGGTCAGGTCAAATGGTTCAACGAAAGCAAGGGATTTGGTTTCATCACGCCAGCTGATGGCTCCAAAGATGTCTTCGTCCATTTTTCTGCCATCCAGAGCGAGGGGTTCAAGACCCTGGCAGAAGGTCAGCAGGTTGAGTTCTCTATCCAGGACTCCCAGCGTGGCCCGGCCGCAGCCGACGTGGTTGCGCTGTAA
GCF_000264765.2_WP_034164343.1	MSNKMTGLVKWFNADKGFGFITPDNGGNDIFVHFSAIQSNGYKSLDEGQKVAFEVQSGAAKGPSAINVTPL	ATGTCTAATAAAATGACTGGCTTAGTAAAATGGTTCAATGCGGATAAAGGCTTTGGTTTCATCACCCCGGATAACGGCGGCAACGATATCTTTGTCCATTTTTCCGCTATTCAAAGCAATGGCTACAAATCCCTGGACGAAGGCCAGAAGGTTGCATTCGAGGTACAAAGCGGCGCAGCTAAAGGGCCGTCAGCCATTAACGTAACCCCGCTGTAA
GCF_000264765.2_WP_071844175.1	MSDKMTGIVRFFDYRSGKGVISPSDGRKDVQVHISALHLKDEETLSAGLRVEFCRMHGRQGPTAANVYLS	TTGTCTGATAAAATGACCGGAATTGTCCGGTTTTTTGATTACCGCAGCGGTAAAGGCGTTATCTCTCCATCCGATGGTCGTAAAGACGTTCAGGTACATATCTCCGCCCTCCATTTAAAAGATGAAGAAACGCTCTCAGCGGGTCTGCGGGTTGAGTTTTGCAGAATGCATGGCCGGCAGGGCCCAACGGCGGCCAACGTTTACCTGTCATAA
GCF_000284295.1_WP_014447450.1	MVTGVVKWFNADKGFGFITPDDGGADVFAHFSAIQMSGYRSLEENQRVEFEVTQGQKGPQAANIRSV	ATGGTTACCGGCGTTGTGAAGTGGTTTAACGCGGACAAGGGCTTCGGATTCATCACCCCGGACGACGGCGGCGCCGACGTCTTCGCCCACTTCTCCGCGATCCAGATGTCGGGCTACCGCAGCCTGGAGGAGAACCAGCGGGTTGAGTTCGAGGTGACCCAGGGCCAGAAGGGCCCGCAGGCCGCGAACATCCGCTCCGTCTGA
GCF_000284295.1_WP_014447834.1	MTTGTVKWFNADKGFGFISPDDGGADVFAHFSAIATSGYRSLEENQKVEFDITQGQKGPQAENIRPL	ATGACTACAGGCACCGTGAAGTGGTTCAACGCCGACAAGGGCTTCGGCTTCATCAGCCCGGACGACGGCGGCGCTGACGTCTTCGCCCACTTCTCCGCGATCGCGACGAGCGGCTACCGCAGCCTCGAGGAGAACCAGAAGGTGGAGTTCGACATCACCCAGGGCCAGAAGGGCCCGCAGGCGGAGAACATCCGCCCGCTCTGA
GCF_000284515.1_WP_014641831.1	MLQGNVKWFNAEKGFGFIEVEGQDDVFVHFSAIQGEGFKTLEENETVSFEIVEGNRGPQAANVQR	ATGTTACAAGGTAATGTTAAATGGTTCAACGCAGAAAAAGGTTTCGGTTTTATTGAAGTAGAAGGTCAAGACGATGTATTCGTTCATTTCTCTGCTATTCAAGGCGAAGGTTTCAAAACACTAGAAGAAAACGAAACAGTTTCTTTCGAAATCGTTGAAGGAAACCGTGGACCGCAAGCAGCTAACGTTCAAAGATAA
GCF_000284515.1_WP_014641832.1	MLQGNVKWFNAEKGFGFIEVEGQDDVFVHFSAIQSEGFKTLEENETVSFEIVEGNRGPQAANVQR	ATGTTACAAGGTAATGTTAAATGGTTCAACGCAGAAAAAGGTTTCGGTTTTATTGAAGTAGAAGGTCAAGACGATGTATTCGTTCATTTCTCTGCTATTCAAAGCGAAGGTTTCAAAACACTAGAAGAAAACGAAACAGTTTCTTTCGAAATCGTTGAAGGAAACCGTGGACCGCAAGCAGCTAACGTTCAAAGATAA
GCF_000284515.1_WP_014642423.1	MVEGTVKWFNAEKGFGFIEVEGQDDVFVHFSAIQEEGFKSLEEGQVVTFEIEEGQRGPQASNVRK	ATGGTTGAAGGTACAGTAAAATGGTTTAATGCAGAAAAAGGTTTTGGATTTATTGAAGTAGAAGGCCAAGACGACGTCTTCGTTCACTTCTCTGCTATTCAAGAAGAAGGTTTCAAATCTCTAGAAGAAGGTCAAGTTGTAACTTTCGAAATCGAAGAAGGACAACGCGGACCACAAGCTTCTAACGTTCGTAAATAA
GCF_000284515.1_WP_014643429.1	MKTGTVKWFNAEKGFGFIEVEGEDDVFVHFSAINEEGFKSLEEGQSVEFEITEGNRGPQAANVTKL	ATGAAAACAGGTACAGTGAAGTGGTTTAACGCGGAAAAAGGTTTTGGTTTTATTGAGGTTGAAGGAGAAGACGATGTATTCGTACACTTCAGCGCGATCAACGAAGAAGGCTTTAAGTCTCTAGAAGAAGGTCAATCTGTGGAATTCGAAATCACAGAAGGTAACCGCGGACCACAAGCTGCAAACGTAACTAAATTATAA
GCF_000284515.1_WP_014643463.1	MQNGTVKWFNAEKGYGFIQVEGGNDVFVHFSAIQEEGFKSLEEGQTVSFEIVEGDRGPQAANVEKQ	ATGCAAAACGGTACAGTAAAATGGTTTAACGCGGAAAAAGGTTACGGCTTCATCCAAGTAGAAGGTGGAAATGATGTATTCGTACACTTCTCTGCAATTCAAGAAGAAGGTTTCAAATCTCTAGAAGAAGGTCAAACCGTTTCTTTCGAAATTGTTGAAGGCGACCGCGGACCACAAGCAGCTAATGTTGAAAAACAATAA
GCF_000287335.1_WP_011410009.1	MSNKVTGLVKWFDAGKGFGFITPADGSKDVFVHFSAIQSNDFKTLDEGQRVEFTIEQGQKGPSAANVVAL	ATGTCTAATAAAGTAACTGGTTTGGTAAAATGGTTTGACGCAGGAAAAGGGTTTGGATTTATCACTCCAGCTGATGGCAGCAAAGATGTCTTTGTTCATTTTTCTGCCATTCAGAGCAATGATTTCAAAACCTTAGACGAAGGTCAGCGTGTAGAATTCACCATTGAGCAAGGCCAGAAAGGCCCATCTGCTGCTAATGTGGTTGCCCTGTAA
GCF_000287335.1_WP_014888082.1	MAKIKGQVKWFNESKGFGFITPADGSKDVFVHFSAIQGNGFKTLTEGQSVEFEIQDGQKGPSAVNVTAL	ATGGCAAAGATCAAAGGTCAAGTGAAGTGGTTCAACGAATCTAAAGGTTTTGGTTTTATCACTCCGGCCGATGGCAGCAAAGATGTATTTGTTCACTTTTCCGCTATTCAGGGTAACGGCTTTAAAACTCTAACCGAAGGCCAGAGCGTCGAATTTGAAATCCAAGATGGCCAAAAAGGGCCTTCAGCAGTCAATGTGACTGCCCTATAA
GCF_000287355.1_WP_014889061.1	MAKIKGQVKWFNESKGFGFITPADGSKDVFVHFSAIQGNGFKTLAEGQNVEFEIQDGQKGPSAVNVTTL	ATGGCAAAGATTAAAGGTCAAGTGAAGTGGTTTAATGAATCTAAAGGTTTTGGTTTTATCACTCCGGCCGATGGTAGTAAAGACGTGTTTGTTCATTTCTCCGCTATTCAGGGTAACGGTTTTAAAACACTAGCCGAAGGTCAGAATGTTGAATTTGAAATACAAGATGGACAAAAAGGTCCTTCAGCAGTTAATGTGACTACTTTATAG
GCF_000297055.2_WP_009205360.1	MATGTVKWFNDSKGFGFITPDDGSEDLFAHFSAIQMGGFKTLKEGQKVQFEITQGPKGKQASNIQAA	ATGGCAACTGGTACTGTAAAATGGTTTAACGATTCCAAGGGTTTCGGCTTCATCACTCCGGACGACGGCAGCGAAGATCTGTTCGCGCACTTCTCCGCGATTCAGATGGGCGGATTCAAAACCTTGAAAGAAGGTCAAAAGGTGCAGTTTGAAATCACCCAAGGCCCCAAGGGTAAGCAAGCTTCCAACATCCAAGCCGCCTAA
GCF_000297075.2_WP_003460433.1	MLSGKVKWFNNAKGYGFILADGRDEDLFAHYSAIQMDGYKTLKAGQPVRFEIVQGPKGLHAINISAVTANQGAPAALPQAHTVASPVEA	ATGCTCAGCGGTAAGGTCAAGTGGTTCAACAACGCCAAAGGTTATGGATTCATCCTGGCCGATGGCCGAGATGAGGACCTGTTCGCCCACTACTCGGCTATCCAGATGGACGGTTACAAAACGCTCAAGGCCGGCCAACCGGTTCGCTTCGAGATTGTGCAAGGCCCCAAGGGCCTGCATGCCATCAATATCAGCGCGGTTACCGCCAACCAGGGCGCCCCAGCGGCCTTACCCCAGGCGCACACTGTCGCGAGCCCTGTCGAAGCCTGA
GCF_000300095.1_WP_007180251.1	METGTVKWFNDAKGFGFITPDGGGEDLFAHFSEIRTEGFKTLQENQKVTFEVKTGPKGKQAANIKPV	ATGGAAACCGGTACCGTCAAGTGGTTCAATGACGCAAAGGGCTTTGGCTTCATCACCCCGGACGGCGGCGGCGAAGATCTGTTCGCGCATTTCTCGGAAATCCGCACGGAAGGCTTCAAGACGCTGCAAGAAAACCAAAAGGTTACGTTTGAAGTGAAGACGGGCCCGAAGGGCAAGCAAGCTGCTAACATCAAGCCGGTGTAA
GCF_000300095.1_WP_007180614.1	MATGTVKWFNDAKGFGFITPDEGGEDLFAHFSAIQMNGFKTLKEGQKVTFEVVQGPKGKQASNIQAPA	ATGGCAACTGGTACGGTCAAATGGTTCAATGACGCAAAAGGTTTCGGATTCATCACGCCGGATGAAGGCGGTGAGGATCTGTTTGCACACTTCTCGGCCATCCAGATGAATGGGTTCAAGACCCTCAAGGAAGGCCAAAAGGTGACCTTCGAGGTCGTGCAAGGCCCGAAAGGCAAGCAGGCATCGAACATCCAGGCACCCGCCTGA
GCF_000300095.1_WP_015004218.1	MATGTVKWFNDAKGFGFITPDDGGEDLFAHFSEIQAKGFRSLQENQKVSFEVKQGPKGRQAANIQPL	ATGGCAACAGGTACAGTGAAGTGGTTCAACGATGCGAAGGGTTTTGGATTTATTACGCCGGACGACGGCGGTGAAGACCTGTTCGCACACTTCTCCGAGATACAGGCAAAAGGCTTCAGGTCTCTGCAGGAAAACCAGAAGGTGAGCTTTGAGGTGAAGCAGGGACCCAAAGGCAGGCAGGCGGCAAACATCCAGCCGCTGTAA
GCF_000307165.1_WP_015010411.1	MAQGTVKWFNADKGFGFIEVEGQDDVFVHFSAIQGEGFKTLEEGQSVTFDIEEGNRGPQAANVVKA	ATGGCACAAGGAACAGTTAAATGGTTTAACGCAGACAAAGGTTTTGGATTTATCGAAGTTGAAGGTCAAGATGATGTATTCGTACACTTCTCAGCTATTCAAGGCGAAGGCTTCAAAACACTTGAAGAAGGACAAAGCGTAACTTTCGATATCGAAGAAGGTAACCGCGGACCACAAGCAGCTAACGTTGTTAAAGCGTAA
GCF_000331065.1_WP_011282991.1	MAKIKGQVKWFNESKGFGFITPSDGSKDVFVHFSAIQGNGFKTLSEGQSVEFEIQDGHKGPSAVNVTAL	ATGGCAAAAATTAAAGGTCAAGTAAAATGGTTTAATGAATCTAAAGGTTTTGGTTTTATTACACCGTCAGATGGTAGCAAAGATGTATTTGTACATTTTTCTGCCATTCAAGGAAATGGATTTAAGACTTTGTCTGAAGGTCAAAGCGTAGAATTTGAAATTCAAGATGGACACAAAGGTCCATCTGCTGTAAACGTGACGGCTTTATGA
GCF_000340795.1_WP_015396257.1	MSSTNETFSNDYKVKLTGTVKWFNDAKGFGFITPDNGGEEIFAHFSSIQMDGFRTLKEGQKVSFEVIQGPKGKQALNITKP	ATGTCTAGTACAAACGAAACATTTAGTAACGATTACAAAGTTAAATTAACTGGAACAGTTAAGTGGTTTAATGACGCAAAGGGATTTGGGTTTATTACTCCAGATAACGGTGGAGAGGAAATATTTGCACACTTTTCTTCTATCCAAATGGATGGTTTTAGAACTCTTAAAGAAGGACAAAAAGTCTCATTTGAGGTTATTCAAGGACCAAAAGGAAAACAAGCACTTAATATAACAAAACCTTAA
GCF_000340825.1_WP_192810993.1	MNNDQKVKSTGTVKWFNDAKGFGFITPDDGGEEIFAHFSSIQMDGFRTLKEGQKVSYELTQGPKGKQALNITKPQI	ATGAATAATGATCAAAAAGTGAAATCAACTGGTACAGTAAAATGGTTTAATGATGCTAAGGGATTTGGATTTATAACTCCAGATGATGGAGGCGAAGAAATATTTGCACATTTCTCTTCTATTCAAATGGATGGCTTCAGAACCCTAAAAGAAGGACAAAAAGTTTCATATGAACTCACACAAGGACCAAAAGGAAAACAAGCACTGAATATAACAAAACCACAAATATAA
GCF_000355675.1_WP_015486943.1	MKTGKVKWFNNAKGYGFILADDSNEDLFAHYSTIQMDGYRTLKAGQAVQFDIKPSDKGSHAINIRALDVAENEQAPITTQSEQREYEDA	ATGAAAACAGGGAAAGTAAAGTGGTTCAACAATGCAAAAGGTTATGGCTTCATCCTTGCCGATGACAGCAACGAGGATCTTTTCGCACACTATTCGACCATTCAAATGGATGGATATCGTACTCTTAAGGCCGGTCAGGCTGTGCAGTTTGATATCAAACCCAGCGACAAAGGCTCTCACGCCATCAACATCCGCGCTCTTGACGTCGCAGAAAATGAACAAGCACCTATAACCACCCAAAGTGAGCAGCGTGAATACGAGGATGCTTAA
GCF_000355765.4_WP_004174375.1	MATGTVKWFNDSKGFGFITPDDGSEDLFAHFSAINMSGFKTLKEGQKVSFEVTQGPKGKQASNIQSA	ATGGCAACAGGTACAGTGAAATGGTTCAACGACTCCAAGGGTTTTGGCTTTATCACCCCGGATGATGGCAGCGAAGATTTATTTGCTCATTTCTCCGCAATCAATATGTCCGGGTTCAAAACTCTCAAGGAAGGCCAGAAAGTGAGCTTTGAAGTCACACAGGGTCCGAAGGGCAAACAAGCCTCAAATATTCAGTCTGCCTAG
GCF_000355765.4_WP_004174403.1	MATGIVKWFNDAKGFGFITPDGGGEDLFAHFSAINSDGFKSLRETQRVTFDVTTGPKGLQASNIKPE	ATGGCAACAGGTATTGTAAAGTGGTTCAACGACGCCAAAGGTTTTGGCTTTATTACACCGGATGGCGGTGGGGAAGATTTGTTTGCACACTTCTCTGCGATCAACAGTGACGGTTTCAAGTCGTTGCGCGAAACCCAGCGTGTCACTTTCGACGTGACGACCGGGCCCAAGGGTCTGCAGGCATCGAATATCAAGCCTGAATAA
GCF_000364725.1_WP_013975440.1	MAKIKGQVKWFNESKGFGFITPTDGSKDVFVHFSAIQGNGFKTLTEGQNVEFEIQDGQKGPSAANVTAL	ATGGCAAAGATCAAAGGTCAAGTTAAGTGGTTCAACGAATCGAAAGGTTTTGGTTTTATCACGCCTACTGATGGCAGTAAGGATGTTTTCGTTCACTTTTCTGCTATTCAGGGTAACGGCTTCAAAACTCTAACGGAAGGTCAGAATGTTGAATTTGAGATTCAGGATGGTCAGAAAGGACCTTCAGCAGCAAATGTAACTGCCTTATAA
GCF_000364725.1_WP_013975462.1	MSHTNKVTGLVKWFDAGKGFGFITPTDGSRDVFVHFSAIQSNNFKTLDEGQRVEFTIEQGQKGPSAANVVAL	ATGTCTCACACTAACAAAGTTACTGGATTAGTCAAATGGTTTGATGCTGGTAAAGGTTTTGGTTTCATCACCCCTACTGACGGCAGCAGGGATGTATTTGTGCATTTTTCTGCCATCCAAAGCAATAATTTTAAAACTTTGGACGAAGGCCAGCGCGTAGAATTTACCATTGAGCAGGGTCAAAAAGGACCTTCTGCGGCTAATGTAGTTGCCCTGTAA
GCF_000402035.1_WP_008347993.1	MATGTVKWFNDAKGFGFITPDDGGEDLFAHFSEIQSKGFKSLQENQKVSFEVKQGPKGKQASTIQPL	ATGGCAACAGGTACTGTGAAGTGGTTCAACGATGCAAAGGGTTTTGGCTTCATCACGCCGGATGACGGCGGTGAAGACTTGTTTGCACATTTCTCCGAAATCCAGTCCAAGGGTTTCAAGTCGCTCCAGGAGAATCAAAAGGTGAGCTTCGAAGTCAAGCAAGGCCCGAAGGGCAAGCAAGCTTCGACGATCCAGCCGCTGTAA
GCF_000402035.1_WP_016344487.1	MSTGTVKWFNDAKGYGFITPDEGGEDLFAHFSAIQMTGFKTLKEGQKVSFEIVQGPKGKQASNIQEAA	ATGTCTACTGGTACGGTCAAATGGTTTAACGACGCGAAAGGCTACGGATTCATCACGCCCGATGAAGGCGGCGAGGATCTGTTTGCACATTTCTCGGCGATTCAAATGACAGGTTTCAAGACGCTCAAGGAAGGCCAGAAGGTGTCCTTCGAAATCGTCCAGGGACCGAAGGGCAAGCAAGCATCGAACATCCAGGAAGCTGCCTGA
GCF_000402035.1_WP_016346375.1	METGTVKWFNDAKGFGFITPDGGGEDLFAHFSEIRIEGFKTLQENQKVTYEVKTGPKGKQAANIKPA	ATGGAAACCGGTACCGTCAAGTGGTTCAATGACGCAAAGGGCTTTGGCTTCATCACTCCGGATGGCGGCGGCGAAGATCTGTTCGCGCACTTCTCGGAAATCCGCATCGAAGGCTTCAAGACGCTTCAGGAAAACCAAAAGGTTACCTATGAAGTGAAGACGGGCCCGAAGGGCAAGCAAGCCGCGAACATCAAGCCGGCCTAA
GCF_000439255.1_WP_000014594.1	MSGKMTGIVKWFNADKGFGFITPDDGSKDVFVHFSAIQNDGYKSLDEGQKVSFTIESGAKGPAAGNVTSL	ATGTCCGGTAAAATGACTGGTATCGTAAAATGGTTCAACGCTGATAAAGGCTTCGGCTTTATTACTCCTGATGACGGTTCTAAAGATGTGTTCGTACACTTCTCCGCCATTCAGAACGATGGTTACAAATCTCTGGATGAAGGTCAGAAAGTTTCCTTCACCATCGAAAGCGGCGCCAAAGGCCCGGCAGCTGGCAACGTAACCAGCCTGTAA
GCF_000439255.1_WP_000034825.1	MSKIKGNVKWFNESKGFGFITPEDGSKDVFVHFSAIQTNGFKTLAEGQRVEFEITNGAKGPSAANVIAL	ATGTCTAAGATTAAAGGTAACGTTAAGTGGTTTAATGAATCCAAAGGATTCGGTTTCATTACTCCGGAAGATGGCAGCAAAGACGTGTTCGTACACTTCTCTGCAATCCAGACCAATGGTTTTAAAACTCTGGCTGAAGGTCAGCGCGTAGAGTTCGAAATCACTAACGGTGCCAAAGGCCCTTCCGCTGCAAACGTAATCGCTCTGTAA
GCF_000439255.1_WP_000447498.1	METGTVKWFNNAKGFGFICPEGGGEDIFAHYSTIQMDGYRTLKAGQSVRFDVHQGPKGNHASIIVPIEAEAVA	ATGGAAACGGGTACTGTAAAGTGGTTCAACAATGCCAAAGGGTTTGGTTTCATCTGCCCTGAAGGCGGCGGCGAGGATATTTTCGCCCATTATTCCACCATTCAGATGGATGGTTACAGAACGCTTAAAGCCGGGCAGTCTGTCCGGTTTGATGTACACCAGGGGCCAAAAGGCAATCATGCCAGTATCATCGTGCCCATCGAAGCAGAGGCCGTTGCATAA
GCF_000439255.1_WP_001062678.1	MAKIKGQVKWFNESKGFGFITPADGSKDVFVHFSAIQGNGFKTLAEGQNVEFEIQDGQKGPAAVNVTAI	ATGGCAAAGATTAAAGGTCAAGTTAAGTGGTTCAACGAGTCCAAAGGTTTTGGCTTCATTACTCCGGCTGATGGCAGCAAAGATGTGTTCGTACACTTCTCCGCTATCCAGGGCAATGGCTTCAAAACTCTGGCTGAAGGCCAGAACGTTGAGTTCGAAATTCAGGACGGCCAGAAAGGTCCGGCCGCTGTTAACGTAACAGCTATCTGA
GCF_000439255.1_WP_024143237.1	MSRKMTGIVKTFDCNSGKGLITPSDGRKDVQLHISACSQQEAKALIPGIRVEFCRINGLRGPTAANVYLS	TTGTCTCGTAAAATGACAGGAATTGTCAAAACTTTTGATTGTAATAGTGGGAAAGGTCTCATCACTCCCTCCGATGGACGTAAAGATGTCCAGCTCCACATTTCAGCATGTAGCCAGCAAGAAGCAAAAGCGCTTATACCCGGTATACGCGTTGAGTTTTGCCGTATCAATGGCCTTCGTGGGCCCACTGCAGCCAACGTTTATCTTTCATAA
GCF_000473245.1_WP_009791059.1	MKNGKVKWFNAEKGFGFIEAEDGNDVFVHYSAIQSEGFKSLEEGQEVSFEVVEGARGPQAANVTKL	ATGAAAAACGGTAAAGTAAAATGGTTTAATGCAGAAAAAGGTTTTGGTTTCATCGAAGCTGAAGACGGAAACGATGTATTCGTTCACTATTCTGCTATCCAATCAGAAGGTTTTAAATCCCTGGAAGAAGGCCAAGAAGTTTCTTTCGAAGTTGTTGAAGGAGCTCGCGGACCTCAAGCGGCTAACGTTACTAAACTATAA
GCF_000473245.1_WP_009791749.1	MQNGKVKWFNNEKGFGFIEVEGGDDVFVHFTAIQGDGFKSLEEGQEVSFEIVEGNRGPQAANVVKL	ATGCAAAACGGCAAAGTTAAATGGTTCAATAACGAAAAAGGTTTTGGTTTTATTGAAGTTGAAGGCGGAGACGATGTGTTCGTTCACTTCACTGCTATCCAAGGCGACGGCTTCAAGTCTTTGGAAGAAGGCCAGGAAGTTTCTTTTGAAATCGTTGAAGGAAACCGCGGACCTCAAGCAGCTAATGTTGTAAAACTTTAA
GCF_000473245.1_WP_009791915.1	MEQGTVKWFNAEKGFGFIEREGGDDVFVHFSAIQSEGFKSLDEGQKVTFDVEQGARGPQAANVQKA	ATGGAACAAGGTACAGTTAAATGGTTTAATGCAGAAAAAGGTTTCGGCTTCATCGAACGCGAAGGTGGAGACGATGTATTCGTACACTTCTCTGCTATTCAAAGCGAAGGATTCAAATCTTTAGACGAAGGTCAAAAAGTAACATTTGACGTTGAGCAAGGTGCTCGCGGACCTCAAGCAGCTAACGTTCAAAAAGCTTAA
GCF_000473245.1_WP_009795528.1	MNTGKVKWFNAEKGFGFIETSEGQDVFVHFSAIQSEGFKSLEEGEAVTFEIVEGNRGPQASNVVKG	ATGAACACAGGTAAAGTAAAATGGTTTAATGCAGAAAAAGGCTTTGGATTTATCGAAACATCTGAAGGCCAGGACGTTTTCGTTCACTTTTCAGCTATCCAATCTGAAGGCTTCAAGTCTTTAGAAGAAGGCGAAGCAGTAACTTTTGAAATCGTTGAAGGCAACCGTGGACCACAAGCTTCTAACGTAGTTAAAGGCTAA
GCF_000473245.1_WP_009795530.1	MATGKVKWFNAEKGFGFIEVEGGEDVFVHFSAIQSEGFKSLDEGQEVEFDIEEGQRGPQAVNVTKL	ATGGCTACAGGTAAAGTAAAATGGTTCAATGCAGAAAAAGGTTTCGGATTCATCGAAGTTGAAGGTGGAGAAGACGTATTCGTCCATTTCTCTGCAATTCAGTCTGAAGGCTTCAAAAGCCTTGATGAAGGTCAAGAAGTTGAATTTGACATTGAAGAAGGCCAGCGTGGACCGCAGGCTGTTAATGTGACGAAACTATAA
GCF_000494755.1_WP_015625344.1	MVTGVVKWFNADKGFGFITPDDGGADVFAHFSAIQTSGYRSLDENQRVEFEVTQGQKGPQAANIRPL	ATGGTTACCGGCGTAGTGAAGTGGTTTAACGCGGACAAGGGCTTCGGGTTCATCACCCCGGACGACGGCGGTGCCGACGTCTTCGCCCACTTCTCCGCCATCCAGACTTCCGGCTACCGCAGCCTGGACGAGAACCAGCGTGTTGAGTTCGAGGTGACCCAGGGCCAGAAGGGCCCGCAGGCCGCGAACATCCGCCCGCTCTGA
GCF_000494755.1_WP_023361248.1	MTTGTVKWFNADKGFGFITPDDGGADVFAHFSAIATSGYRSLDENQKVEFDITQGQKGLQAENIRPL	ATGACTACAGGCACCGTGAAGTGGTTCAACGCTGACAAGGGCTTCGGCTTCATCACCCCGGACGACGGCGGCGCTGACGTCTTCGCCCACTTCTCTGCGATCGCGACGAGTGGCTACCGCAGCCTCGACGAGAACCAGAAGGTCGAGTTCGACATCACCCAGGGCCAGAAGGGCCTGCAGGCGGAGAACATCCGCCCGCTCTGA
GCF_000498975.2_WP_023630409.1	MASGKVKWFNNAKGYGFINEDGKTDDLFAHYSAIQMDGYKTLKAGQSVNFEIIQGPKGLHATEIKSATSTVQASATNPGSTVEV	ATGGCAAGCGGTAAAGTCAAGTGGTTCAACAATGCCAAGGGCTACGGATTCATCAACGAGGACGGCAAGACCGATGATCTGTTCGCCCACTATTCAGCGATCCAGATGGACGGGTACAAGACGCTGAAAGCCGGCCAATCCGTGAACTTCGAGATCATCCAGGGCCCCAAAGGGCTTCACGCGACAGAGATCAAAAGCGCCACCAGCACGGTACAGGCCAGCGCCACGAACCCAGGCAGCACCGTCGAAGTCTGA
GCF_000504585.2_WP_023594576.1	MATGTVKWFNDAKGFGFITPDEGGEDLFAHFSAIQMNGFKTLKEGQKVQFEVVQGPKGKQASNIQAAP	ATGGCAACCGGTACGGTCAAATGGTTTAACGATGCCAAGGGTTTTGGTTTCATCACGCCTGACGAAGGTGGCGAGGACCTGTTCGCGCACTTCTCGGCGATCCAGATGAACGGCTTCAAGACCCTCAAGGAAGGTCAGAAGGTGCAGTTCGAGGTCGTTCAAGGCCCGAAGGGCAAGCAAGCTTCGAACATCCAGGCAGCTCCCTGA
GCF_000517305.1_WP_025259491.1	MLSGKVKWFNNAKGYGFILADGRDEDLFAHYSAIQMDGYKTLKAGQPVQFEIIQGPKGLHAVNISSASTATAPTSADASSAAQKPANVSA	ATGCTCAGTGGTAAAGTCAAGTGGTTCAATAATGCAAAAGGCTACGGATTTATTCTTGCCGATGGCAGAGATGAAGATCTGTTTGCTCATTATTCAGCCATACAAATGGATGGCTACAAAACGCTCAAGGCAGGCCAACCGGTCCAATTCGAGATCATTCAAGGCCCCAAGGGATTACATGCCGTGAATATCTCGTCTGCGTCCACAGCTACTGCTCCAACATCCGCAGATGCTTCAAGCGCAGCACAAAAGCCAGCTAATGTGTCGGCCTGA
GCF_000517405.1_WP_005968829.1	MAKIKGQVKWFNESKGFGFITPADGSKDVFVHFSAIQGNGFKTLAEGQNVEFEIQDGQKGPSAVNVTAL	ATGGCAAAGATCAAAGGTCAAGTGAAGTGGTTCAACGAGTCTAAAGGTTTTGGTTTCATCACTCCGGCCGATGGCAGCAAAGACGTGTTCGTTCACTTCTCCGCTATTCAGGGTAACGGTTTCAAAACTCTGGCCGAAGGCCAGAACGTCGAATTCGAAATCCAGGATGGCCAGAAAGGCCCTTCAGCAGTTAATGTAACTGCCCTGTAA
GCF_000517405.1_WP_025244663.1	MSKIKGNVKWFNESKGFGFITPEDGSKDVFVHFSAIQSNGFKTLAEGQRVEFEITNGAKGPSAADVTAI	ATGTCTAAGATTAAAGGTAACGTTAAGTGGTTTAATGAGTCCAAAGGATTCGGTTTCATTACGCCTGAAGATGGCAGCAAAGATGTGTTCGTACACTTCTCCGCCATCCAGAGCAACGGTTTCAAAACCCTGGCTGAAGGTCAGCGCGTAGAGTTTGAAATCACCAATGGCGCCAAAGGCCCTTCGGCTGCTGACGTTACTGCTATTTAA
GCF_000517405.1_WP_025245343.1	METGKVKWFNNAKGFGFICPENGGEDIFAHYSTIQMDGYRTLKAGQVVRFEVHQGPKGNHASLIVPVEAETVA	ATGGAGACGGGTAAAGTTAAATGGTTCAATAACGCCAAAGGTTTTGGTTTTATCTGCCCGGAAAACGGCGGCGAGGATATCTTTGCGCACTATTCAACGATCCAGATGGACGGTTACCGGACGCTGAAAGCGGGGCAAGTCGTCAGATTCGAGGTTCATCAGGGGCCCAAAGGGAACCATGCGAGCCTGATTGTGCCTGTTGAAGCCGAGACTGTTGCCTAA
GCF_000517405.1_WP_071882318.1	MSNKVTGLVKWFDAGKGFGFITPADDSKDVFVHFSAIQSNDFKTLDEGQRVEFTIEQGQKGPSAANVVAL	ATGTCTAATAAAGTAACTGGTTTAGTAAAATGGTTTGACGCAGGTAAAGGTTTTGGTTTCATCACTCCGGCTGACGACAGCAAAGATGTTTTTGTTCACTTTTCCGCCATCCAGAGCAACGATTTCAAAACCCTGGACGAAGGCCAGCGCGTAGAATTCACCATTGAGCAGGGTCAGAAAGGCCCGTCCGCTGCTAACGTGGTTGCCCTGTAA
GCF_000517425.1_WP_005968829.1	MAKIKGQVKWFNESKGFGFITPADGSKDVFVHFSAIQGNGFKTLAEGQNVEFEIQDGQKGPSAVNVTAL	ATGGCAAAGATCAAAGGTCAAGTGAAGTGGTTCAACGAGTCTAAAGGTTTTGGTTTCATCACTCCGGCCGATGGCAGCAAAGACGTGTTCGTTCACTTCTCCGCTATTCAGGGTAACGGTTTCAAAACTCTGGCCGAAGGCCAGAACGTCGAATTCGAAATCCAGGATGGCCAGAAAGGCCCTTCAGCAGTTAATGTAACTGCCCTGTAA
GCF_000517425.1_WP_011410009.1	MSNKVTGLVKWFDAGKGFGFITPADGSKDVFVHFSAIQSNDFKTLDEGQRVEFTIEQGQKGPSAANVVAL	ATGTCTAATAAAGTAACTGGTTTAGTAAAATGGTTTGACGCAGGTAAAGGTTTTGGTTTTATCACTCCGGCTGACGGCAGCAAAGATGTGTTTGTTCACTTTTCCGCCATCCAGAGCAACGATTTCAAAACCCTGGACGAAGGCCAGCGCGTAGAATTCACCATTGAGCAGGGTCAGAAAGGCCCGTCTGCTGCTAACGTGGTTGCCCTGTAA
GCF_000517425.1_WP_025244663.1	MSKIKGNVKWFNESKGFGFITPEDGSKDVFVHFSAIQSNGFKTLAEGQRVEFEITNGAKGPSAADVTAI	ATGTCTAAGATTAAAGGTAACGTTAAGTGGTTTAATGAGTCCAAAGGATTCGGTTTCATTACGCCTGAAGATGGCAGCAAAGACGTGTTCGTACACTTCTCCGCCATCCAGAGCAACGGTTTCAAAACCCTGGCTGAAGGTCAGCGCGTAGAGTTTGAAATCACCAATGGCGCCAAAGGCCCTTCGGCTGCTGACGTTACTGCTATTTAA
GCF_000517425.1_WP_025245343.1	METGKVKWFNNAKGFGFICPENGGEDIFAHYSTIQMDGYRTLKAGQVVRFEVHQGPKGNHASLIVPVEAETVA	ATGGAGACGGGTAAAGTTAAATGGTTCAATAACGCCAAAGGTTTTGGTTTTATCTGCCCGGAAAACGGCGGCGAGGATATCTTTGCGCACTATTCAACGATCCAGATGGACGGTTACCGGACGCTGAAAGCGGGGCAAGTCGTCAGATTCGAGGTTCATCAGGGGCCCAAAGGGAACCATGCGAGCCTGATTGTGCCTGTTGAAGCCGAGACTGTTGCCTAA
GCF_000520015.2_WP_002210315.1	MSKIKGSVKWFNESKGFGFITPEDGSKDVFVHFSAIASNGFKTLAEGQRVEFEITNGAKGPSAANVIAI	ATGTCTAAGATTAAAGGTAGCGTTAAGTGGTTTAATGAATCCAAAGGTTTCGGTTTCATTACTCCAGAAGATGGTAGTAAGGACGTTTTCGTTCATTTCTCTGCCATCGCTAGCAATGGTTTCAAAACTCTTGCTGAAGGCCAGCGTGTAGAATTTGAAATCACGAACGGTGCCAAAGGGCCATCTGCTGCTAACGTTATCGCCATCTAA
GCF_000520015.2_WP_002221949.1	MAKIKGQVKWFNESKGFGFITPADGSKDVFVHFSAIQGNGFKTLAEGQNVEFEIQDGQKGPSAVNVTAI	ATGGCAAAGATCAAAGGTCAAGTTAAGTGGTTCAACGAGTCTAAAGGTTTCGGTTTCATCACTCCGGCTGACGGTAGCAAAGATGTGTTCGTACACTTCTCTGCAATCCAGGGTAACGGTTTCAAAACCCTGGCTGAAGGCCAGAACGTTGAATTCGAAATCCAAGATGGCCAGAAAGGCCCATCAGCAGTAAACGTTACTGCTATCTAA
GCF_000520015.2_WP_004946278.1	MSNMIKGQVKWFNESKGFGFITPADGSKDVFVHFSAIQDQGFKTLAEGQNVQFSIENGAKGPSAANVTAI	ATGTCTAACATGATCAAAGGTCAAGTGAAGTGGTTCAACGAGTCTAAAGGTTTTGGTTTCATCACTCCAGCAGACGGCAGCAAAGATGTGTTCGTACACTTCTCCGCTATCCAAGATCAAGGTTTCAAGACCCTGGCTGAAGGCCAGAACGTACAGTTCTCTATTGAGAACGGTGCTAAAGGTCCGTCAGCGGCTAACGTTACCGCTATCTAA
GCF_000520015.2_WP_024911890.1	METGTVKWFNNAKGFGFICPEGGGEDIFAHYSTIKMDGYRTLKAGQQVRFDVHQGPKGNHASLILPLESEALA	ATGGAGACGGGTACTGTTAAATGGTTCAATAACGCCAAAGGTTTTGGCTTTATTTGCCCCGAAGGCGGTGGCGAAGATATTTTCGCCCATTATTCGACAATCAAGATGGATGGTTACAGAACGCTAAAAGCTGGCCAACAAGTCAGGTTTGACGTTCATCAAGGGCCAAAAGGGAACCATGCGAGCCTTATTCTGCCGCTGGAAAGCGAGGCATTAGCCTAA
GCF_000521505.1_WP_014751120.1	MSETTETSVPEEGGNKQTGTVKWFNDAKGFGFITPDGGGEDLFAHFSSIQMNGFKTLKEGQRVTFEIAQGPKGQQALNIMAA	ATGTCAGAAACAACAGAAACATCAGTCCCGGAAGAAGGCGGTAACAAACAGACCGGGACCGTAAAATGGTTTAACGATGCCAAAGGGTTCGGTTTCATCACACCCGATGGCGGCGGCGAAGACCTTTTTGCCCACTTTTCCTCCATCCAGATGAATGGATTCAAGACGCTAAAAGAAGGTCAGCGCGTTACTTTCGAAATTGCACAGGGTCCAAAAGGTCAACAGGCACTTAATATAATGGCAGCATAG
GCF_000522545.2_WP_007586257.1	MATGTVKWFNDAKGFGFITPDEGGEDLFAHFSAIQMNGFKTLKEGQKVSFEVVQGPKGKQASNIQSAA	ATGGCAACTGGTACGGTCAAGTGGTTCAACGACGCGAAAGGTTTCGGATTCATTACGCCCGACGAAGGCGGTGAGGATCTGTTTGCACACTTTTCGGCTATCCAGATGAACGGTTTCAAGACCCTCAAGGAAGGCCAGAAAGTTAGCTTCGAGGTCGTTCAAGGCCCGAAGGGTAAACAGGCATCGAACATTCAGTCCGCAGCCTGA
GCF_000522545.2_WP_007731769.1	METGTVKWFNDAKGFGFITPDAGGEDLFAHFSEIRVEGFKTLQENQKVTYDVKTGPKGKQAANIKPV	ATGGAAACCGGTACCGTCAAGTGGTTCAATGACGCAAAGGGCTTTGGTTTTATCACGCCGGACGCCGGCGGCGAAGATCTGTTCGCGCATTTCTCGGAAATCCGCGTAGAAGGCTTCAAGACGCTGCAGGAAAACCAAAAGGTTACCTACGACGTCAAGACGGGCCCGAAGGGCAAGCAGGCCGCTAACATCAAGCCGGTCTAA
GCF_000582515.1_WP_002210315.1	MSKIKGSVKWFNESKGFGFITPEDGSKDVFVHFSAIASNGFKTLAEGQRVEFEITNGAKGPSAANVIAI	ATGTCTAAGATTAAAGGTAGCGTTAAGTGGTTCAATGAATCCAAAGGTTTCGGCTTCATTACCCCAGAAGATGGTAGCAAGGACGTTTTTGTTCATTTTTCTGCCATCGCTAGCAATGGTTTCAAAACGCTTGCTGAAGGCCAGCGTGTAGAATTTGAAATCACGAACGGTGCCAAAGGGCCATCTGCTGCTAATGTTATCGCTATCTAA
GCF_000582515.1_WP_002210893.1	MSNMMKGQVKWFNESKGFGFITPADGSKDVFVHFSAIQDQGFKTLAEGQNVQFSIENGAKGPSAANVTAI	ATGTCTAACATGATGAAAGGTCAAGTAAAGTGGTTCAACGAGTCTAAAGGCTTCGGTTTCATCACTCCAGCTGATGGCAGCAAAGACGTGTTCGTTCACTTCTCTGCTATCCAAGATCAAGGCTTCAAGACCCTGGCTGAAGGCCAGAATGTACAGTTCTCTATCGAGAACGGTGCTAAAGGTCCGTCTGCAGCAAACGTAACTGCAATCTAA
GCF_000582515.1_WP_002211350.1	METGTVKWFNNAKGFGFICPEGGGEDIFAHYSTIQMDGYRTLKAGQIVNFDVHEGPKGNHASLIVPLELNSVPPLDGVSPPELAILA	ATGGAGACGGGTACTGTTAAATGGTTCAACAACGCCAAAGGTTTTGGCTTTATTTGCCCTGAGGGCGGTGGCGAAGACATTTTCGCTCACTATTCAACTATCCAGATGGATGGTTACCGAACATTAAAAGCCGGCCAAATAGTTAACTTTGATGTTCATGAAGGCCCCAAAGGGAACCATGCCAGCCTGATTGTTCCGCTAGAGTTAAATAGTGTACCACCGTTAGACGGTGTATCACCGCCGGAACTCGCTATACTGGCCTGA
GCF_000582515.1_WP_002212220.1	MSNKMTGLVKWFDAGKGFGFISPADGSKDVFVHFSAIQGNDYKTLDEGQNVEFSIEQGQKGPSAVNVVAL	ATGTCTAATAAAATGACTGGTTTAGTAAAATGGTTTGATGCTGGTAAAGGTTTCGGTTTTATTTCTCCTGCAGACGGCAGCAAAGATGTATTTGTACATTTCTCTGCAATCCAGGGTAATGACTACAAAACTCTTGATGAAGGCCAGAACGTTGAGTTCAGCATCGAGCAAGGCCAAAAAGGCCCTTCAGCTGTAAACGTTGTAGCACTGTAA
GCF_000582515.1_WP_002221949.1	MAKIKGQVKWFNESKGFGFITPADGSKDVFVHFSAIQGNGFKTLAEGQNVEFEIQDGQKGPSAVNVTAI	ATGGCAAAGATCAAAGGTCAAGTTAAGTGGTTCAACGAGTCTAAAGGCTTCGGTTTCATCACTCCAGCAGATGGTAGCAAAGATGTGTTTGTACACTTCTCTGCAATCCAAGGTAATGGCTTCAAAACCTTGGCTGAAGGCCAGAACGTAGAGTTCGAAATCCAAGACGGTCAGAAAGGTCCGTCTGCAGTAAACGTTACTGCAATCTAA
GCF_000582515.1_WP_011193172.1	MSNKMTGLVKWFDAGKGFGFISPADGSKDVFVHFSAIQSNDFKTLDEGQNVEFSIENGAKGPSAVNVIAL	ATGTCTAATAAAATGACTGGTTTAGTAAAATGGTTTGACGCTGGTAAAGGTTTTGGTTTCATCTCTCCGGCTGATGGCAGCAAAGATGTGTTCGTTCACTTCTCTGCTATCCAAAGCAATGATTTCAAAACTCTGGATGAAGGCCAAAATGTAGAGTTCTCTATCGAGAACGGCGCTAAAGGCCCCTCAGCAGTAAATGTAATCGCCCTGTAA
GCF_000582515.1_WP_025381657.1	MSNKMTGLVKWFDAGKGFGFISPADGSKDVFVHFSAIQSNDFKTLDEGQNVEFSIENGAKGPSAANVIAL	ATGTCTAATAAAATGACTGGTTTAGTAAAATGGTTTGACGCTGGTAAAGGTTTTGGTTTCATCTCTCCGGCTGATGGCAGCAAAGATGTGTTCGTTCACTTCTCTGCTATCCAAAGCAATGATTTCAAAACTCTGGATGAAGGCCAAAATGTAGAGTTCTCTATCGAGAACGGCGCTAAAGGCCCCTCAGCAGCCAATGTTATTGCTCTATAA
GCF_000599985.1_WP_025315032.1	MNKKTGQVKWFNESKGFGFITPADGSKDVFVHFSAISGDGFKTLAEGQQVEFAIQDSPRGPAAAEVVVI	ATGAATAAGAAAACAGGCCAAGTAAAATGGTTTAACGAGAGTAAAGGTTTCGGTTTTATAACCCCTGCCGATGGAAGTAAAGACGTATTTGTTCACTTCTCAGCTATTTCCGGTGACGGATTTAAAACATTAGCTGAAGGTCAACAAGTCGAATTTGCTATCCAAGATAGCCCTCGTGGACCTGCAGCAGCTGAAGTTGTTGTTATTTAA
GCF_000599985.1_WP_025315126.1	MSKITGQVKWFNESKGFGFISPADGSKDVFVHFSAITGDGFKTLGEGQKVEFSIQDSPRGPAAADVSVI	ATGTCTAAGATTACTGGTCAAGTGAAATGGTTTAACGAAAGTAAAGGTTTTGGTTTTATTTCCCCTGCTGATGGCAGCAAAGATGTGTTTGTTCATTTCTCTGCAATTACTGGTGACGGATTTAAAACATTAGGTGAAGGTCAAAAAGTAGAATTTTCTATTCAAGATAGCCCACGTGGTCCTGCTGCTGCAGACGTTTCAGTGATCTAG
GCF_000600005.1_WP_025330479.1	MATGIVKWFNDAKGFGFITPDEGGEDLFAHFSAINMNGFKTLKEGQRVSFDVTTGPKGKQAANIQAA	ATGGCAACTGGTATTGTTAAGTGGTTTAACGACGCTAAAGGTTTTGGTTTTATTACCCCAGATGAAGGTGGCGAAGATTTGTTTGCACATTTCTCTGCAATCAACATGAATGGTTTCAAAACCTTGAAAGAAGGTCAACGTGTATCTTTTGATGTGACCACCGGTCCAAAAGGTAAACAAGCGGCTAATATTCAGGCAGCTTAA
GCF_000600105.1_WP_004230088.1	MKQGTVKWFNSEKGFGFIEVEGENDVFVHFSAIQGEGFKTLDEGQKVEFEVVDGNRGPQAANVTKL	ATGAAACAAGGTACAGTAAAATGGTTTAACTCAGAAAAAGGTTTTGGATTCATCGAAGTTGAAGGCGAAAACGACGTATTCGTACACTTCTCAGCTATCCAAGGCGAAGGTTTCAAAACACTTGACGAAGGTCAAAAAGTGGAATTCGAAGTTGTAGATGGCAACCGCGGACCACAAGCTGCTAACGTAACTAAACTTTAA
GCF_000600105.1_WP_010859201.1	MTQGTVKWFNAEKGFGFIEVEGGNDVFVHFSAIQSEGFKTLEEGQKVEFGVEEGNRGPQATNVVKL	ATGACTCAAGGTACAGTAAAATGGTTTAACGCAGAAAAAGGTTTTGGCTTCATCGAAGTAGAAGGTGGAAACGATGTATTCGTACACTTCTCTGCTATCCAATCTGAAGGTTTCAAAACACTTGAAGAAGGACAAAAAGTAGAATTCGGCGTTGAAGAAGGTAACCGTGGCCCTCAAGCTACAAACGTTGTAAAACTTTAA
GCF_000612505.1_WP_025332779.1	METGTVKWFNADKGFGFIEVEGGSDVFVHFSAIVSEGFKTLDEGQRVEFNIVQGNRGPQAENVVKL	ATGGAAACAGGAACAGTTAAATGGTTTAACGCAGACAAAGGATTTGGCTTTATCGAGGTTGAAGGCGGCAGCGACGTATTCGTGCATTTCAGCGCAATCGTCAGCGAAGGCTTCAAGACTCTTGATGAAGGCCAACGCGTTGAGTTCAACATCGTTCAAGGCAACCGCGGTCCGCAAGCCGAGAACGTCGTTAAACTGTAA
GCF_000612505.1_WP_025334410.1	MKGTVKWFNAEKGYGFIQVDGGEDVFVHFSAIQGDGFKTLEEGQSVEFEITEGNRGPQAANVIKL	TTGAAAGGTACAGTAAAATGGTTTAACGCAGAAAAAGGTTACGGTTTTATCCAAGTTGATGGCGGCGAAGACGTATTCGTTCATTTCTCCGCAATCCAAGGAGACGGCTTCAAGACTTTGGAAGAAGGTCAATCCGTTGAATTCGAAATCACTGAAGGCAACCGCGGCCCTCAAGCAGCTAACGTAATTAAACTGTAA
GCF_000612505.1_WP_025337122.1	MQTGTVKWFNAEKGFGFIEVEGGNDVFVHFSAIVGEGFKSLDEGQRVEFNVVQGNRGPQAENVVKL	ATGCAAACAGGTACAGTTAAATGGTTCAACGCAGAGAAAGGCTTTGGCTTCATCGAAGTTGAAGGCGGAAACGACGTATTCGTACACTTCAGCGCAATCGTCGGCGAAGGCTTCAAATCGCTGGACGAAGGCCAACGCGTTGAATTCAACGTTGTTCAAGGCAACCGCGGACCGCAAGCTGAGAACGTTGTAAAACTGTAA
GCF_000612685.1_WP_043683009.1	MSESIENTGESQKLTGTVKWFNDAKGFGFITPDNGGEDLFAHFSSIQMNGFKTLKEGQKVVFDIAQGPKGKQALNITAA	ATGTCGGAATCCATCGAAAACACCGGAGAGTCACAAAAGCTGACAGGAACGGTCAAATGGTTCAATGACGCCAAGGGCTTTGGCTTCATTACCCCCGACAATGGGGGTGAAGACCTTTTCGCACATTTTTCGTCCATCCAGATGAACGGCTTCAAGACCCTGAAAGAAGGGCAGAAGGTCGTTTTCGATATCGCGCAGGGTCCGAAAGGCAAACAAGCCCTGAACATCACCGCCGCCTGA
GCF_000619905.2_WP_004174375.1	MATGTVKWFNDSKGFGFITPDDGSEDLFAHFSAINMSGFKTLKEGQKVSFEVTQGPKGKQASNIQSA	ATGGCAACTGGTACAGTAAAATGGTTCAACGACTCAAAAGGTTTCGGTTTCATTACACCGGATGATGGTAGCGAAGATCTATTCGCTCACTTCTCCGCCATCAATATGTCCGGATTCAAAACTCTTAAAGAAGGTCAAAAAGTAAGTTTTGAGGTTACTCAAGGTCCGAAGGGCAAGCAAGCTTCAAATATTCAATCTGCTTAA
GCF_000709415.1_WP_001831260.1	MKQGTVKWFNAEKGFGFIEVEGENDVFVHFSAINQEGYKSLEEGQSVEFEVVEGDRGPQAANVVKL	ATGAAACAAGGTACAGTAAAATGGTTTAACGCTGAAAAAGGATTTGGTTTTATCGAAGTTGAAGGAGAAAACGATGTATTCGTACACTTCTCAGCAATTAACCAAGAGGGTTACAAATCATTAGAAGAAGGTCAATCAGTTGAATTTGAAGTAGTTGAAGGCGACCGCGGTCCTCAAGCTGCAAACGTTGTAAAACTATAA
GCF_000709415.1_WP_011303913.1	MNNGTVKWFNAEKGFGFIEVEGGNDVFVHFSAIAQEGYKSLEEGQAVEFEIVEGDRGPQAANVVKL	ATGAATAACGGTACAGTTAAATGGTTTAATGCAGAAAAAGGTTTCGGTTTCATCGAAGTTGAAGGCGGAAACGACGTATTCGTACACTTCTCAGCAATCGCTCAAGAAGGTTACAAATCATTAGAAGAAGGACAAGCTGTTGAATTCGAAATCGTTGAAGGCGACCGCGGTCCTCAAGCAGCTAACGTTGTTAAATTATAA
GCF_000723165.1_WP_010398811.1	MATGIVKWFNDSKGFGFITPDEGGEDLFAHFSAIQSNGFKSLQENQRVSFEVTAGPKGKQASNIQPI	ATGGCAACTGGCATCGTAAAATGGTTCAATGATTCGAAGGGTTTCGGCTTTATTACCCCTGACGAAGGCGGCGAAGATCTGTTCGCTCACTTCTCGGCTATCCAGTCGAACGGCTTCAAGTCCCTGCAAGAGAACCAACGCGTTTCTTTTGAAGTGACCGCTGGCCCTAAAGGCAAGCAAGCTTCGAACATTCAGCCAATCTAA
GCF_000723165.1_WP_038495037.1	MATGTVKWFNDSKGFGFITPDDGGEDLFAHFSAINMNGFKTLKEGQKVQFEVTQGPKGKQASNIQAG	ATGGCAACAGGTACAGTTAAGTGGTTCAATGATTCCAAAGGTTTTGGCTTCATCACTCCAGATGATGGCGGCGAAGATTTGTTTGCTCATTTCTCCGCAATCAACATGAACGGTTTCAAGACCCTCAAAGAAGGTCAAAAAGTTCAGTTCGAAGTCACGCAAGGCCCTAAAGGCAAGCAAGCTTCCAACATCCAGGCTGGTTAA
GCF_000724775.3_WP_004230088.1	MKQGTVKWFNSEKGFGFIEVEGENDVFVHFSAIQGEGFKTLDEGQKVEFEVVDGNRGPQAANVTKL	ATGAAACAAGGTACAGTAAAATGGTTTAACTCAGAAAAAGGTTTTGGATTCATCGAAGTTGAAGGTGAAAACGACGTATTCGTACACTTCTCAGCTATCCAAGGCGAAGGTTTCAAAACACTTGACGAAGGTCAAAAAGTGGAATTCGAAGTTGTAGATGGCAACCGCGGACCACAAGCTGCTAACGTAACTAAACTTTAA
GCF_000725365.1_WP_038558067.1	MTGKVKWFNADKGFGFIEREDGDDVFVHFSAIQSEGFKTLDEGQEVEFEIVEGNRGPQAANVTRL	ATGACTGGAAAAGTAAAATGGTTTAACGCAGACAAAGGTTTTGGTTTCATCGAAAGAGAGGACGGAGACGACGTATTCGTACACTTCTCTGCTATCCAATCTGAAGGTTTCAAAACTCTTGACGAAGGTCAAGAAGTTGAATTCGAAATCGTTGAAGGCAACCGCGGCCCACAAGCTGCTAACGTAACTCGTCTGTAA
GCF_000730385.1_WP_012519905.1	MSKVTGTVKWFNADKGYGFLTQDNGGKDVFVHFRAIISDGYKTLPEGQRVEFEVEEGQKGLQAANVQAI	ATGTCTAAAGTTACAGGCACCGTTAAGTGGTTTAACGCTGATAAAGGTTATGGTTTTCTAACTCAAGATAACGGCGGTAAGGACGTATTCGTTCATTTCCGTGCAATTATCTCTGACGGTTACAAGACTCTTCCAGAAGGTCAGCGCGTAGAATTTGAAGTTGAAGAAGGTCAAAAAGGTCTTCAAGCTGCTAACGTGCAAGCCATCTAA
GCF_000730385.1_WP_044056965.1	MAVGKVKWFNNAKGFGFIVPEDGGEDIFAHYSTIQMEGYRSLKAGQEVTYDVQQGPKGLHAENIGFLEEPER	ATGGCGGTTGGAAAAGTTAAGTGGTTTAACAACGCAAAAGGGTTTGGATTTATTGTTCCCGAGGATGGCGGAGAAGACATCTTCGCGCACTATTCTACAATCCAAATGGAAGGATATCGCTCACTAAAAGCCGGTCAAGAGGTGACCTATGATGTGCAGCAGGGCCCTAAAGGCCTTCACGCTGAGAACATTGGGTTCTTAGAAGAGCCAGAGCGTTAA
GCF_000733715.2_WP_017360860.1	MLSGKVKWFNNAKGYGFILADGRDEDLFAHYSAIQMDGYKTLKAGQPVRFEIVQGPKGLHAVNISAASATQDAPVAATQTQSIASTAEV	ATGCTCAGTGGTAAGGTCAAGTGGTTCAACAACGCCAAAGGCTATGGGTTCATCCTGGCCGACGGCCGAGATGAGGACCTGTTCGCCCACTACTCGGCCATCCAGATGGACGGTTATAAAACGCTCAAGGCCGGTCAACCGGTCCGCTTCGAGATCGTGCAAGGCCCCAAAGGACTGCATGCGGTCAATATCAGCGCAGCCAGCGCCACCCAGGATGCCCCCGTGGCAGCCACCCAGACGCAGAGTATCGCGAGCACTGCCGAAGTCTGA
GCF_000740965.1_WP_005967874.1	MSNKMTGLVKWFDAGKGFGFITPDNGSKDVFVHFSAIQSNDFKTLDEGQKVEFTIENGQKGPSAGNVVAL	ATGTCTAATAAAATGACTGGTTTAGTAAAATGGTTTGACGCTGGTAAAGGTTTTGGTTTCATTACTCCTGACAACGGTAGCAAAGATGTATTCGTACATTTCTCTGCTATTCAGAGCAACGATTTCAAAACTCTGGACGAAGGCCAAAAAGTTGAGTTCACCATTGAAAATGGTCAGAAAGGCCCATCAGCTGGCAACGTTGTTGCGCTGTAA
GCF_000740965.1_WP_005968829.1	MAKIKGQVKWFNESKGFGFITPADGSKDVFVHFSAIQGNGFKTLAEGQNVEFEIQDGQKGPSAVNVTAL	ATGGCAAAGATTAAAGGTCAGGTTAAGTGGTTCAACGAGTCTAAAGGCTTTGGTTTCATCACTCCTGCTGACGGCAGCAAAGATGTATTCGTACATTTCTCTGCAATTCAAGGCAACGGCTTCAAAACTCTGGCTGAAGGCCAGAACGTAGAATTCGAAATTCAGGATGGCCAGAAAGGTCCTTCCGCAGTAAACGTCACTGCGCTGTAA
GCF_000740965.1_WP_005976270.1	MSKIKGSVKWFNESKGFGFITPEDGSKDVFVHFSAIQSNGFKTLAEGQRVEFEITDGAKGPSAANVNAI	ATGTCTAAGATTAAAGGTAGTGTTAAGTGGTTTAATGAGTCGAAAGGCTTCGGTTTCATTACTCCAGAAGACGGTAGCAAAGATGTGTTCGTACACTTCTCTGCAATCCAGAGCAATGGTTTCAAAACTCTGGCTGAAGGTCAGCGTGTAGAGTTCGAAATCACTGACGGTGCCAAAGGTCCTTCTGCTGCTAACGTTAACGCTATTTAA
GCF_000740965.1_WP_011094202.1	METGTVKWFNNAKGFGFICPEGGGDDIFAHYSTIQMDGYRTLKAGQVVRFDVHEGPKGNHACLIVPQIVEAVS	ATGGAGACAGGTACTGTTAAATGGTTCAATAATGCCAAAGGGTTTGGTTTTATCTGTCCAGAAGGGGGTGGTGACGATATCTTCGCGCACTACTCAACTATTCAAATGGATGGCTACCGGACGCTGAAAGCCGGACAGGTTGTCAGGTTTGATGTTCATGAAGGGCCGAAAGGCAATCATGCCTGCCTGATCGTCCCGCAAATCGTCGAGGCCGTATCCTGA
GCF_000743945.1_WP_038499899.1	MSNTNHANSLGENLLKGTVKWFNDAKGFGFITPEGGGEDLFAHYSAIQMTGFRTLKEGQEVKFELAEGPKGKQAINIIAA	ATGTCTAATACCAACCACGCCAACTCTTTAGGAGAAAACCTACTTAAAGGAACTGTTAAGTGGTTTAACGACGCCAAAGGATTTGGGTTTATCACCCCCGAAGGCGGCGGAGAAGACTTGTTTGCTCACTATTCTGCCATCCAAATGACAGGATTTAGGACACTAAAAGAAGGTCAAGAAGTGAAATTTGAATTAGCGGAAGGGCCTAAGGGTAAACAAGCTATTAACATTATTGCCGCGTAG
GCF_000754265.1_WP_038498357.1	MSKIKGNVKWFNESKGFGFITPEDGSKDVFVHFSAIQSNGFKTLAEGQRVEFEITNGAKGPSAADVTAL	ATGTCTAAGATTAAAGGTAACGTTAAATGGTTTAATGAATCCAAAGGATTCGGTTTTATTACCCCTGAAGATGGCAGCAAGGATGTTTTCGTACACTTCTCCGCTATTCAGAGTAACGGTTTTAAAACATTAGCGGAAGGTCAGCGCGTAGAGTTTGAAATTACTAATGGCGCCAAAGGCCCCTCGGCTGCTGACGTTACTGCTCTCTAA
GCF_000756125.1_WP_004196460.1	MATGIVKWFNDAKGFGFITPDEGGEDLFAHFSAINMQGFKTLKEGQKVSFEVVQGPKGKQASNIQAA	ATGGCAACTGGTATTGTCAAATGGTTCAATGACGCGAAGGGCTTCGGCTTCATCACGCCCGACGAAGGCGGCGAAGATCTGTTTGCACATTTCTCGGCGATCAACATGCAGGGCTTCAAAACCCTGAAGGAAGGCCAAAAGGTCAGCTTCGAGGTAGTGCAAGGCCCGAAGGGCAAGCAAGCGTCGAACATCCAAGCAGCTTGA
GCF_000756125.1_WP_004196837.1	MATGTVKWFNDAKGFGFITPEGGGEDLFAHFSEIRVDGFKTLQENQKVEFEVKTGPKGLQAANIKPL	ATGGCAACCGGTACCGTCAAGTGGTTCAACGACGCCAAGGGTTTTGGTTTCATCACGCCGGAAGGCGGCGGCGAAGATCTCTTCGCGCACTTCTCGGAAATCCGCGTCGACGGCTTCAAGACGCTGCAAGAGAACCAGAAGGTCGAGTTTGAAGTAAAGACCGGCCCGAAGGGTCTGCAGGCAGCGAACATCAAGCCGCTGTAA
GCF_000756615.1_WP_025332779.1	METGTVKWFNADKGFGFIEVEGGSDVFVHFSAIVSEGFKTLDEGQRVEFNIVQGNRGPQAENVVKL	ATGGAAACAGGAACAGTTAAATGGTTTAACGCAGACAAAGGCTTTGGCTTTATCGAAGTTGAAGGCGGCAGCGACGTATTCGTGCATTTCAGCGCAATCGTAAGCGAAGGCTTCAAGACCCTTGATGAAGGTCAACGCGTCGAGTTCAATATTGTTCAAGGCAACCGCGGTCCGCAAGCCGAGAACGTAGTTAAGCTGTAA
GCF_000756615.1_WP_036592608.1	MQTGTVKWFNAEKGFGFIEVEGGSDVFVHFSAIVGDGFKTLDEGQRVEFNVVQGNRGPQAENVVKL	ATGCAAACAGGTACAGTTAAATGGTTTAACGCAGAAAAAGGCTTTGGCTTCATCGAAGTTGAAGGCGGAAGCGACGTATTCGTACATTTCAGCGCAATCGTCGGCGACGGCTTCAAAACGTTGGACGAAGGCCAACGCGTTGAATTCAACGTTGTTCAAGGCAACCGTGGACCACAAGCCGAAAACGTTGTAAAACTGTAA
GCF_000756615.1_WP_042206241.1	MKGTVKWFNAEKGYGFIQVDGGEDVFVHFSAIQGDGFKTLEEGQSVEFEITDGNRGPQAANVIKL	TTGAAAGGTACAGTAAAATGGTTTAACGCAGAAAAAGGCTACGGTTTCATCCAAGTTGACGGCGGCGAAGACGTATTCGTTCATTTTTCCGCAATCCAAGGAGATGGATTTAAGACTTTGGAAGAAGGTCAATCCGTTGAATTCGAAATCACTGACGGCAACCGTGGACCGCAAGCAGCTAACGTAATCAAACTGTAA
GCF_000758665.1_WP_019914582.1	MQTGTVKWFNAEKGFGFIEVEGGSDVFVHFSAITGDGFKTLDEGQRVEFNVVQGNRGPQAENVVKL	ATGCAAACAGGTACAGTTAAATGGTTCAACGCAGAAAAAGGATTCGGTTTCATCGAAGTTGAAGGCGGAAGCGACGTATTCGTTCACTTCAGCGCAATCACTGGCGACGGCTTCAAAACTTTGGACGAAGGCCAACGCGTTGAATTCAACGTTGTTCAAGGCAACCGCGGACCACAAGCCGAAAACGTTGTAAAACTGTAA
GCF_000758665.1_WP_019914790.1	MQTGTVKWFNADKGFGFIEVEGGSDVFVHFSAITGDGFKSLDEGQRVEFNVTQGARGPQAENVVKL	ATGCAAACAGGTACAGTAAAATGGTTCAACGCAGACAAAGGTTTCGGTTTTATCGAGGTTGAAGGCGGAAGCGACGTATTCGTACACTTCTCCGCAATCACTGGCGACGGCTTCAAATCTTTGGACGAAGGCCAACGCGTTGAGTTCAACGTAACTCAAGGCGCTCGTGGACCACAAGCCGAAAACGTTGTAAAACTGTAG
GCF_000758665.1_WP_019915069.1	MEGKVKWFNAEKGYGFIETADGGDVFVHFSAIQTDGFKTLDEGQSVEFDIVEGARGPQAANVIKL	ATGGAAGGTAAAGTAAAATGGTTTAACGCAGAAAAAGGTTATGGTTTCATCGAAACTGCCGATGGTGGCGACGTATTCGTACACTTCTCCGCGATTCAAACTGACGGTTTCAAGACATTGGACGAAGGCCAATCCGTAGAGTTCGATATCGTTGAAGGCGCACGCGGACCACAAGCAGCTAACGTCATCAAATTATAA
GCF_000758665.1_WP_036725228.1	MKGTVKWFNAEKGYGFLQVEGGEDVFVHFSAIQGDGFKTLDEGQAVEFDVTDGNRGPQAANVVKL	TTGAAAGGTACAGTAAAATGGTTTAACGCAGAAAAAGGTTATGGTTTCCTTCAAGTAGAAGGCGGCGAAGATGTATTCGTTCACTTCTCAGCTATTCAAGGCGACGGTTTCAAGACTTTGGATGAAGGCCAAGCGGTTGAATTCGATGTTACTGATGGTAACCGTGGTCCACAAGCAGCGAACGTAGTTAAATTATAA
GCF_000758685.1_WP_038695124.1	MKGTVKWFNAEKGYGFIQVEGGEDVFVHFSAIQGDGFKTLEEGQSVEFEITEGNRGPQAANVIKL	TTGAAAGGTACAGTTAAATGGTTTAATGCAGAAAAAGGCTATGGCTTCATCCAAGTAGAAGGCGGCGAAGACGTATTCGTACATTTCTCCGCAATCCAGGGAGACGGCTTCAAGACTTTGGAAGAAGGCCAATCCGTTGAGTTCGAAATCACGGAAGGCAACCGCGGACCGCAAGCAGCTAACGTAATCAAACTGTAA
GCF_000758705.1_WP_019911834.1	MKGTVKWFNAEKGYGFLQVEGGEDVFVHFSAIQGDGFKTLDEGQAVEFDITDGNRGPQAANVVKL	TTGAAAGGTACAGTAAAATGGTTTAACGCAGAAAAAGGCTATGGTTTTCTTCAAGTAGAAGGCGGCGAAGATGTATTCGTTCACTTCTCAGCAATTCAAGGCGACGGATTCAAGACTTTGGATGAAGGCCAAGCGGTAGAATTCGATATTACTGATGGTAACCGCGGTCCTCAAGCAGCTAACGTAGTTAAATTATAA
GCF_000758705.1_WP_019914582.1	MQTGTVKWFNAEKGFGFIEVEGGSDVFVHFSAITGDGFKTLDEGQRVEFNVVQGNRGPQAENVVKL	ATGCAAACAGGTACAGTTAAATGGTTCAACGCAGAAAAAGGATTCGGTTTCATCGAAGTTGAAGGCGGAAGCGACGTATTCGTTCACTTCAGCGCTATTACTGGCGACGGCTTCAAAACTTTGGACGAAGGCCAACGCGTTGAATTCAACGTTGTTCAAGGCAACCGTGGACCACAAGCCGAAAACGTTGTAAAACTGTAA
GCF_000758705.1_WP_019914790.1	MQTGTVKWFNADKGFGFIEVEGGSDVFVHFSAITGDGFKSLDEGQRVEFNVTQGARGPQAENVVKL	ATGCAAACAGGTACAGTTAAATGGTTCAACGCAGACAAAGGTTTCGGTTTTATCGAGGTTGAAGGCGGAAGCGACGTATTCGTACACTTCTCCGCAATCACTGGCGACGGTTTCAAGTCTTTGGACGAAGGCCAACGCGTTGAGTTCAACGTAACTCAAGGCGCTCGTGGACCCCAAGCCGAAAACGTTGTAAAACTGTAA
GCF_000758705.1_WP_019915069.1	MEGKVKWFNAEKGYGFIETADGGDVFVHFSAIQTDGFKTLDEGQSVEFDIVEGARGPQAANVIKL	ATGGAAGGTAAAGTTAAATGGTTTAACGCAGAAAAAGGTTATGGTTTCATCGAAACTGCCGATGGTGGCGACGTATTCGTACACTTCTCCGCGATTCAAACTGATGGTTTCAAAACATTGGATGAAGGCCAATCCGTAGAGTTCGACATCGTTGAAGGTGCACGCGGACCCCAAGCAGCTAACGTCATCAAATTATAA
GCF_000758725.1_WP_019914582.1	MQTGTVKWFNAEKGFGFIEVEGGSDVFVHFSAITGDGFKTLDEGQRVEFNVVQGNRGPQAENVVKL	ATGCAAACAGGTACAGTTAAATGGTTCAACGCAGAAAAAGGATTCGGATTTATCGAAGTTGAAGGCGGAAGCGACGTATTCGTTCACTTCAGCGCAATCACTGGCGACGGCTTCAAAACTTTGGACGAAGGCCAACGCGTTGAATTCAACGTTGTTCAAGGCAACCGTGGACCACAAGCCGAAAACGTTGTAAAACTGTAA
GCF_000758725.1_WP_019914790.1	MQTGTVKWFNADKGFGFIEVEGGSDVFVHFSAITGDGFKSLDEGQRVEFNVTQGARGPQAENVVKL	ATGCAAACAGGTACAGTGAAATGGTTTAACGCAGACAAAGGATTCGGTTTTATCGAGGTTGAAGGTGGAAGCGACGTATTCGTACACTTCTCCGCAATCACAGGCGACGGATTTAAATCTTTGGACGAAGGCCAACGCGTTGAGTTCAACGTAACTCAAGGCGCTCGTGGACCACAAGCCGAAAACGTTGTAAAACTGTAG
GCF_000758725.1_WP_019915069.1	MEGKVKWFNAEKGYGFIETADGGDVFVHFSAIQTDGFKTLDEGQSVEFDIVEGARGPQAANVIKL	ATGGAAGGTAAAGTAAAATGGTTTAACGCAGAAAAAGGTTATGGTTTTATCGAGACTGCAGACGGTGGCGACGTATTCGTACACTTTTCCGCGATTCAAACTGATGGTTTCAAGACATTGGATGAAGGTCAATCCGTAGAATTCGATATCGTTGAAGGTGCACGTGGACCACAAGCAGCTAACGTAATCAAATTATAA
GCF_000763515.1_WP_003719639.1	MEQGTVKWFNAEKGFGFIERENGDDVFVHFSAIQGDGFKSLDEGQAVTFDVEEGQRGPQAANVQKA	ATGGAACAAGGTACAGTAAAATGGTTTAACGCAGAAAAAGGATTTGGTTTTATCGAACGCGAAAACGGTGACGATGTATTCGTACATTTCAGCGCTATCCAAGGCGACGGATTCAAATCTTTAGACGAAGGTCAAGCAGTAACTTTCGACGTTGAAGAAGGCCAACGCGGACCTCAAGCAGCTAACGTTCAAAAAGCGTAA
GCF_000763515.1_WP_003720346.1	MQTGTVKWFNSEKGFGFIEVEGGDDVFVHFSAIEGDGFKTLDEGQSVEFEIVEGQRGPQAEKVTKL	ATGCAAACAGGTACAGTAAAATGGTTTAACAGTGAAAAAGGCTTCGGCTTCATCGAAGTAGAAGGCGGAGATGATGTATTCGTACACTTCAGCGCTATTGAAGGTGATGGATTCAAAACTTTAGACGAAGGTCAAAGCGTTGAATTTGAAATCGTTGAAGGTCAACGTGGCCCACAAGCAGAAAAAGTTACAAAACTTTAA
GCF_000763515.1_WP_003728273.1	MQNGKVKWFNNEKGYGFIESDGGEDIFVHFTAIQGDGYKSLEEGQAVTFEVVEGNRGAQAANVEKA	ATGCAGAATGGGAAAGTAAAATGGTTTAACAATGAAAAAGGTTACGGTTTTATCGAATCAGACGGCGGCGAAGATATTTTTGTTCACTTCACAGCAATCCAAGGTGATGGCTACAAATCTTTAGAAGAAGGCCAAGCGGTCACTTTTGAAGTGGTAGAAGGTAACCGTGGGGCTCAAGCTGCGAATGTAGAAAAAGCCTAA
GCF_000769555.1_WP_003153604.1	MQNGKVKWFNNEKGFGFIEVEGGDDVFVHFTAIEGEGYKSLEEGQEVSFEIVEGNRGPQASNVVKL	ATGCAAAACGGTAAAGTAAAATGGTTCAACAACGAAAAAGGATTCGGCTTCATCGAAGTTGAAGGCGGAGACGACGTATTTGTTCACTTCACTGCTATCGAAGGAGAAGGATACAAATCATTAGAAGAAGGACAAGAAGTTTCTTTTGAAATTGTCGAAGGTAATCGTGGACCTCAAGCTTCTAATGTTGTAAAACTCTAA
GCF_000769555.1_WP_003155376.1	MLEGKVKWFNSEKGFGFIEVEGQDDVFVHFSAIQGEGFKTLEEGQSVSFEIVEGNRGPQAANVTKA	ATGTTAGAAGGTAAAGTAAAATGGTTCAACTCTGAAAAAGGATTCGGATTCATCGAAGTAGAAGGTCAAGACGATGTATTCGTTCACTTCTCTGCTATTCAAGGCGAAGGCTTCAAAACTTTAGAAGAAGGCCAATCTGTTTCTTTCGAAATCGTTGAAGGAAACCGCGGACCACAAGCTGCTAACGTAACAAAAGCATAA
GCF_000769555.1_WP_003156143.1	MEQGTVKWFNAEKGFGFIERENGDDVFVHFSAIQSDGFKSLDEGQKVTFDVEQGARGAQAANVQKTA	ATGGAACAAGGTACAGTTAAATGGTTTAATGCAGAAAAAGGTTTTGGATTTATCGAACGTGAAAATGGAGACGATGTATTCGTACACTTTTCTGCAATCCAAAGTGACGGATTCAAATCTTTAGACGAAGGTCAAAAAGTAACGTTTGACGTTGAGCAAGGTGCTCGTGGAGCTCAAGCTGCTAACGTTCAAAAAACTGCTTAA
GCF_000770115.1_WP_005427548.1	MATGTVKWFNNAKGFGFICSDEEEGDIFAHYSTIQMDGYRTLKAGQQVSYEIEKGPKGSHASSVVPIEGQAK	ATGGCTACAGGTACAGTAAAGTGGTTTAACAACGCCAAAGGATTTGGGTTTATTTGTTCAGACGAAGAGGAAGGAGACATTTTCGCCCACTACTCAACTATCCAAATGGACGGTTATCGTACACTGAAAGCAGGCCAACAAGTCTCATACGAGATTGAAAAAGGTCCAAAAGGTTCACACGCAAGCAGCGTTGTTCCAATAGAAGGCCAAGCCAAATAA
GCF_000772105.1_WP_004744316.1	MATGTVKWFNNAKGFGFICPEGEDGDVFAHYSTIKMDGYRTLKAGQQVSFEVEEGPKGYHASSVVPVEAQPAK	ATGGCTACAGGTACAGTAAAATGGTTTAACAACGCCAAAGGATTTGGTTTTATTTGTCCAGAGGGAGAAGATGGTGATGTGTTCGCGCACTACTCCACCATTAAAATGGACGGTTATCGTACTCTGAAAGCTGGCCAACAAGTGAGTTTTGAAGTGGAAGAAGGACCTAAAGGCTATCACGCTAGCTCTGTGGTTCCGGTTGAGGCTCAACCAGCAAAATAA
GCF_000772105.1_WP_004744614.1	MSNKTTGIVKWFNEEKGFGFITPENGGADVFVHFRAIASEGFKTLKEGQQVSFEVEQGQKGPQAANVVPA	ATGTCTAACAAAACTACTGGTATCGTAAAATGGTTTAACGAAGAGAAAGGCTTCGGTTTCATCACTCCAGAAAACGGCGGTGCTGACGTATTCGTTCACTTCCGTGCTATCGCTTCTGAAGGTTTCAAAACTCTAAAAGAAGGCCAACAGGTTTCTTTTGAAGTTGAACAAGGTCAAAAAGGCCCACAAGCTGCTAACGTAGTACCAGCTTAA
GCF_000788395.1_WP_038641462.1	MACGKVKWFNNAKGFGFIVEEGSTEDIFAHFSTIQMDGYKTLKAGQDVTFELQQGPKGLHATNIAPSEGDV	ATGGCTTGCGGAAAAGTCAAATGGTTTAACAACGCAAAAGGGTTTGGGTTTATCGTAGAGGAAGGCAGCACGGAGGATATCTTTGCGCATTTTTCAACCATTCAAATGGATGGCTACAAAACACTTAAAGCCGGCCAAGATGTAACATTTGAGTTGCAACAAGGTCCTAAAGGCCTACACGCGACCAATATTGCGCCATCTGAAGGCGATGTTTAA
GCF_000807275.1_WP_039104189.1	MSKKTGQVKWFNESKGFGFITPADGSKDVFVHFSSIAGEGFKTLAEGQKVEFSIQDSPRGPAAAEVVVI	ATGAGTAAGAAAACAGGGCAAGTAAAGTGGTTTAACGAAAGCAAAGGTTTCGGTTTCATCACTCCAGCCGATGGTAGTAAAGATGTATTCGTTCACTTTTCTTCTATTGCAGGTGAAGGATTTAAAACTTTAGCTGAAGGACAAAAAGTTGAATTCTCCATTCAGGATAGTCCGCGTGGACCAGCAGCAGCTGAAGTTGTTGTAATATAA
GCF_000807275.1_WP_039104747.1	MTKKTGQVKWFNESKGFGFITPVDGSKDVFVHFSAIVNDGFKTLAEGQNVEFSIQDSARGPAAADVRVI	ATGACTAAAAAAACTGGCCAAGTAAAATGGTTTAACGAAAGTAAAGGTTTTGGATTTATTACTCCTGTTGATGGTAGCAAAGATGTTTTTGTTCACTTTTCTGCAATCGTAAATGATGGTTTTAAAACCTTAGCGGAAGGTCAAAACGTTGAGTTTTCAATTCAAGACAGTGCTCGTGGTCCAGCTGCTGCAGATGTTAGAGTAATCTAA
GCF_000807775.2_WP_010807119.1	MATGTVKWFNDAKGFGFITPDEGGEDLFAHFSAIQMNGFKTLKEGQKVQFEVVQGPKGKQASNIQAAA	ATGGCAACCGGTACGGTCAAATGGTTTAACGACGCCAAGGGTTTTGGTTTCATCACGCCGGATGAGGGTGGCGAAGATCTGTTCGCTCACTTCTCGGCGATCCAGATGAACGGGTTCAAGACCCTCAAGGAAGGTCAGAAGGTGCAGTTCGAGGTCGTTCAAGGCCCGAAGGGCAAGCAGGCTTCGAACATCCAGGCTGCTGCCTGA
GCF_000807775.2_WP_039371811.1	MATGTVKWFNDAKGFGFITPDEGGEDLFAHFSEIQSKGFKSLQENQKVSFEVKNGPKGRQASNIQPI	ATGGCAACTGGTACCGTCAAGTGGTTTAACGACGCCAAGGGTTTTGGTTTTATTACGCCGGACGAAGGTGGTGAAGATCTCTTCGCTCACTTCTCGGAAATCCAATCGAAGGGTTTCAAGTCGCTGCAAGAAAACCAAAAGGTCAGCTTCGAAGTGAAGAACGGACCGAAGGGCCGCCAAGCCAGCAACATCCAGCCCATCTAA
GCF_000815105.2_WP_039405152.1	MATGTVKWFNDAKGFGFITPDEGGEDLFAHFSAIQMNGFKTLKEGQKVTFDVVQGPKGKQASNIQSPT	ATGGCAACCGGTACGGTCAAATGGTTTAACGATGCCAAGGGTTTTGGTTTCATCACGCCGGATGAGGGTGGCGAAGATCTGTTCGCTCACTTCTCGGCGATCCAGATGAACGGCTTCAAGACCCTGAAGGAAGGTCAGAAGGTGACGTTCGACGTCGTCCAGGGCCCGAAGGGCAAGCAGGCGTCGAACATTCAGTCGCCGACCTGA
GCF_000816085.1_WP_001831260.1	MKQGTVKWFNAEKGFGFIEVEGENDVFVHFSAINQEGYKSLEEGQSVEFEVVEGDRGPQAANVVKL	ATGAAACAAGGTACAGTAAAATGGTTTAACGCTGAAAAAGGTTTTGGTTTTATCGAAGTTGAAGGTGAAAACGATGTATTCGTACACTTCTCAGCAATTAACCAAGAAGGTTACAAATCATTAGAAGAAGGTCAATCAGTTGAATTTGAAGTAGTTGAAGGCGACCGCGGTCCACAAGCTGCAAACGTTGTAAAACTATAA
GCF_000818095.1_WP_039809180.1	MKTGTVKWFNAEKGFGFIEVEGENDVFVHFSAITGEGFKSLDEGQQVEFEVVEGNRGPQAANVVKL	ATGAAAACTGGTACAGTAAAATGGTTTAACGCAGAAAAAGGTTTTGGCTTCATCGAAGTTGAAGGAGAAAACGACGTATTCGTACACTTCTCAGCTATCACAGGCGAAGGCTTCAAATCACTTGACGAAGGCCAGCAGGTTGAGTTCGAAGTGGTTGAAGGTAACCGTGGACCACAAGCAGCTAACGTTGTAAAACTGTAA
GCF_000818095.1_WP_039809309.1	MHNGKVKWFNNEKGYGFLEVEGGDDVFVHFTAVQGDGYKSLEEGQEVSFEIVEGNRGPQAANVIKKD	ATGCATAATGGCAAAGTAAAATGGTTCAATAACGAAAAAGGCTACGGATTTTTGGAAGTTGAAGGTGGCGATGATGTATTTGTGCATTTTACGGCCGTGCAGGGTGATGGCTACAAATCCCTAGAGGAAGGTCAGGAAGTTTCATTTGAAATTGTAGAAGGTAATCGCGGGCCACAGGCTGCGAATGTCATTAAGAAAGATTAA
GCF_000818095.1_WP_039812117.1	MNEGTVKWFNAEKGFGFIEVDGGEDVFVHFSAITGEGFKTLEEGQKVSFEITQGNRGDQAANVVKL	ATGAACGAAGGTACAGTAAAATGGTTTAACGCAGAAAAAGGATTTGGCTTCATCGAAGTAGACGGCGGCGAAGATGTATTCGTACACTTCTCAGCTATCACTGGCGAAGGATTCAAAACTCTTGAAGAAGGTCAAAAAGTTAGCTTTGAAATCACTCAAGGCAACCGTGGCGACCAAGCTGCTAACGTTGTAAAATTATAA
GCF_000828515.1_WP_041069633.1	MSSSKKKGNVKWFNESKGFGFITPEDGSKDVFVHFSAIQGQGFKTLAEGQSVEFEITEGAKGPSAANVTSLN	ATGTCTTCTTCTAAGAAAAAAGGTAATGTTAAGTGGTTTAATGAATCTAAAGGATTCGGTTTTATTACACCTGAAGATGGTAGTAAAGATGTTTTCGTACATTTTTCTGCTATTCAAGGTCAAGGATTTAAAACTCTTGCTGAGGGTCAGTCAGTAGAGTTTGAAATTACCGAAGGTGCCAAAGGTCCTTCTGCTGCTAATGTTACCAGCCTGAATTAA
GCF_000828815.1_WP_041062996.1	MSKIKGNVKWFNESKGFGFITPEDGSKDVFVHFSAIQSNGFKTLSEGQRVEFEITDGAKGPSAANVISL	ATGTCCAAAATTAAAGGTAACGTTAAGTGGTTTAATGAATCAAAAGGATTCGGTTTCATTACTCCGGAAGATGGTAGTAAAGATGTTTTTGTACATTTTTCTGCTATCCAAAGCAATGGTTTCAAAACTCTATCCGAAGGACAACGTGTTGAGTTTGAAATTACTGACGGTGCAAAAGGTCCATCTGCTGCTAACGTTATCAGTTTGTAA
GCF_000829055.1_WP_003566521.1	MEHGTVKWFNAEKGYGFITREDGSDVFVHFSAIQGDGYKTLEEGQAVTFEVEDSDRGPQAVNVNKD	ATGGAACACGGCACAGTTAAATGGTTCAACGCTGAAAAGGGTTACGGCTTTATCACACGGGAAGATGGCAGCGATGTTTTCGTTCACTTCTCAGCTATCCAAGGCGACGGTTACAAGACCCTCGAAGAAGGCCAAGCGGTAACGTTTGAAGTCGAAGACAGCGATCGCGGCCCACAAGCGGTTAACGTTAACAAAGACTAA
GCF_000829395.1_WP_041092732.1	MEQGTVKWFNADKGFGFITREDGNDVFVHFSAIQGDGFKTLEEGQSVSFDVEESDRGPQAVNVNKA	ATGGAACAAGGTACAGTTAAATGGTTTAACGCAGACAAAGGTTTTGGTTTTATTACTCGCGAAGATGGCAATGATGTATTCGTACATTTCTCAGCTATCCAAGGCGACGGCTTCAAGACTCTTGAAGAAGGCCAATCAGTTTCTTTCGACGTTGAAGAAAGCGACCGTGGACCACAAGCCGTTAACGTTAACAAGGCTTAA
GCF_000831645.3_WP_041499062.1	MEHGTVKWFNPDKGFGFITREDGSDVFAHFSAIQGDGFKTLDEGQHVTFDVEDGDRGPQAANIVKD	ATGGAACATGGTACAGTTAAATGGTTTAACCCTGATAAAGGTTTTGGTTTTATTACTCGCGAAGATGGTAGTGACGTTTTTGCTCACTTCTCAGCTATCCAAGGTGACGGATTCAAGACTTTAGACGAAGGTCAACACGTAACATTCGACGTAGAAGACGGCGATCGTGGACCACAAGCTGCTAATATCGTTAAAGACTAA
GCF_000831645.3_WP_041500642.1	MENGTVKWFNAEKGYGFITREDGSDVFVHFSAIQGDGYKTLEEGQAVTFDIEDSDRGPQASNVNKA	ATGGAAAACGGAACAGTTAAATGGTTTAACGCAGAAAAAGGTTATGGTTTTATTACTCGCGAAGATGGTAGTGATGTATTCGTACATTTCTCAGCTATCCAAGGCGACGGTTACAAGACTCTTGAAGAAGGCCAAGCAGTTACATTTGATATCGAAGATTCAGATCGTGGCCCACAAGCTTCAAACGTTAACAAAGCTTAA
GCF_000832905.1_WP_013859190.1	MQNGKVKWFNNEKGYGFIEVEGGDDVFVHFTAIQGEGFKTLEEGQAVSFDIVEGNRGPQAANVTKLS	ATGCAAAACGGTAAAGTAAAATGGTTCAATAACGAAAAAGGCTACGGATTCATTGAAGTTGAGGGCGGAGACGATGTTTTCGTTCATTTCACCGCTATTCAAGGTGAAGGGTTCAAAACTTTGGAAGAAGGCCAGGCTGTTTCTTTCGACATCGTTGAAGGCAACCGCGGACCTCAGGCAGCGAATGTAACAAAACTTTCATAA
GCF_000832905.1_WP_013859272.1	MEHGTVKWFNSEKGYGFIEREGGDDVFVHFSAIQGEGYKTLEEGQKVSFDVEEGSRGPQAANVQKED	GTGGAACATGGTACAGTAAAATGGTTTAACAGTGAAAAAGGCTACGGTTTTATTGAACGGGAAGGCGGAGACGACGTGTTTGTCCATTTCTCGGCCATCCAGGGTGAAGGCTATAAAACGCTTGAAGAAGGCCAGAAAGTATCATTTGATGTGGAAGAAGGATCACGCGGCCCGCAGGCGGCAAATGTTCAAAAAGAAGACTAA
GCF_000832905.1_WP_013859436.1	MEQGKVKWFNSEKGYGFIEREGGSDVFVHFSAIQGEGFKTLEEGQSVSFDIEEGNRGPQAANVSKL	ATGGAACAAGGTAAAGTAAAATGGTTTAATTCGGAAAAAGGCTACGGATTTATCGAACGCGAAGGCGGAAGCGATGTATTTGTTCACTTCTCAGCGATTCAGGGCGAAGGTTTTAAAACTTTGGAAGAAGGCCAATCCGTATCTTTTGATATTGAAGAAGGCAACCGCGGACCACAAGCTGCGAACGTTTCGAAATTATAA
GCF_000834295.1_WP_002210315.1	MSKIKGSVKWFNESKGFGFITPEDGSKDVFVHFSAIASNGFKTLAEGQRVEFEITNGAKGPSAANVIAI	ATGTCTAAGATTAAAGGTAGCGTTAAGTGGTTCAATGAATCCAAAGGTTTCGGCTTCATTACCCCAGAAGATGGTAGCAAGGACGTTTTTGTTCATTTTTCTGCCATCGCTAGCAATGGTTTCAAAACGCTTGCTGAAGGCCAGCGTGTAGAATTTGAAATCACGAACGGTGCCAAAGGGCCATCTGCTGCTAATGTTATCGCTATCTAA
GCF_000834295.1_WP_002210893.1	MSNMMKGQVKWFNESKGFGFITPADGSKDVFVHFSAIQDQGFKTLAEGQNVQFSIENGAKGPSAANVTAI	ATGTCTAACATGATGAAAGGTCAAGTAAAGTGGTTCAACGAGTCTAAAGGCTTCGGTTTCATCACTCCAGCTGATGGCAGCAAAGACGTGTTCGTTCACTTCTCTGCTATCCAAGATCAAGGCTTCAAGACCCTGGCTGAAGGCCAGAATGTACAGTTCTCTATCGAGAACGGTGCTAAAGGTCCGTCTGCAGCAAACGTAACTGCAATCTAA
GCF_000834295.1_WP_002211350.1	METGTVKWFNNAKGFGFICPEGGGEDIFAHYSTIQMDGYRTLKAGQIVNFDVHEGPKGNHASLIVPLELNSVPPLDGVSPPELAILA	ATGGAGACGGGTACTGTTAAATGGTTCAACAACGCCAAAGGTTTTGGCTTTATTTGCCCTGAGGGCGGTGGCGAAGACATTTTCGCTCACTATTCAACTATCCAGATGGATGGTTACCGAACATTAAAAGCCGGCCAAATAGTTAACTTTGATGTTCATGAAGGCCCCAAAGGGAACCATGCTAGCCTGATTGTTCCGCTAGAGTTAAATAGTGTACCACCGTTAGACGGTGTATCACCGCCGGAACTCGCTATACTGGCCTGA
GCF_000834295.1_WP_002212220.1	MSNKMTGLVKWFDAGKGFGFISPADGSKDVFVHFSAIQGNDYKTLDEGQNVEFSIEQGQKGPSAVNVVAL	ATGTCTAATAAAATGACTGGTTTGGTAAAATGGTTTGATGCTGGTAAAGGTTTTGGTTTTATTTCTCCTGCAGACGGCAGCAAAGATGTATTTGTACATTTCTCTGCAATCCAGGGTAATGACTACAAAACTCTTGATGAAGGCCAGAACGTTGAGTTCAGCATCGAGCAAGGCCAAAAAGGCCCTTCAGCTGTAAACGTTGTAGCACTGTAA
GCF_000834295.1_WP_002221949.1	MAKIKGQVKWFNESKGFGFITPADGSKDVFVHFSAIQGNGFKTLAEGQNVEFEIQDGQKGPSAVNVTAI	ATGGCAAAGATCAAAGGTCAAGTTAAGTGGTTCAACGAGTCTAAAGGCTTCGGTTTCATCACTCCAGCAGATGGCAGCAAAGATGTGTTTGTACACTTCTCTGCAATCCAAGGTAATGGCTTCAAAACCTTGGCTGAAGGCCAGAACGTAGAGTTCGAAATCCAAGACGGTCAGAAAGGTCCGTCTGCAGTAAACGTTACTGCAATCTAA
GCF_000834295.1_WP_011193172.1	MSNKMTGLVKWFDAGKGFGFISPADGSKDVFVHFSAIQSNDFKTLDEGQNVEFSIENGAKGPSAVNVIAL	ATGTCTAATAAAATGACTGGTTTAGTAAAATGGTTTGACGCTGGTAAAGGTTTTGGTTTCATCTCTCCGGCTGATGGCAGCAAAGATGTGTTCGTTCACTTCTCTGCTATCCAGAGTAATGATTTCAAAACCCTGGATGAAGGCCAAAATGTGGAGTTCTCTATCGAGAACGGCGCTAAAGGCCCCTCAGCAGTAAACGTAATCGCCCTGTAA
GCF_000834295.1_WP_011193173.1	MSNKMTGLVKWFDAGKGFGFITPADGGKDVFVHFSAIQSNDFKTLDEGQNVEFSIENGAKGPAAVNVIAL	ATGTCTAATAAAATGACTGGTTTAGTAAAATGGTTTGACGCTGGTAAAGGTTTTGGTTTCATCACTCCGGCTGATGGCGGCAAAGATGTGTTCGTTCACTTCTCTGCTATCCAGAGCAATGATTTCAAAACCCTGGATGAAGGCCAAAATGTGGAGTTCTCTATCGAGAACGGCGCTAAAGGCCCTGCAGCGGTAAACGTTATTGCGCTGTAA
GCF_000834395.1_WP_002210315.1	MSKIKGSVKWFNESKGFGFITPEDGSKDVFVHFSAIASNGFKTLAEGQRVEFEITNGAKGPSAANVIAI	ATGTCTAAGATTAAAGGTAGCGTTAAGTGGTTCAATGAGTCCAAAGGTTTCGGCTTCATTACCCCAGAAGATGGTAGCAAAGACGTTTTCGTTCATTTCTCTGCCATCGCTAGCAATGGTTTCAAAACTCTTGCTGAAGGTCAGCGCGTAGAATTTGAAATTACGAACGGTGCCAAAGGGCCATCTGCTGCTAATGTTATCGCTATCTAA
GCF_000834395.1_WP_002210893.1	MSNMMKGQVKWFNESKGFGFITPADGSKDVFVHFSAIQDQGFKTLAEGQNVQFSIENGAKGPSAANVTAI	ATGTCTAACATGATGAAAGGTCAAGTAAAGTGGTTCAACGAGTCTAAAGGCTTCGGTTTCATCACTCCAGCTGATGGCAGCAAAGACGTGTTCGTTCACTTCTCTGCAATCCAAGATCAAGGCTTCAAGACCCTGGCTGAAGGCCAGAATGTACAGTTCTCTATCGAGAACGGTGCTAAAGGTCCGTCTGCAGCAAACGTAACTGCAATCTAA
GCF_000834395.1_WP_002221949.1	MAKIKGQVKWFNESKGFGFITPADGSKDVFVHFSAIQGNGFKTLAEGQNVEFEIQDGQKGPSAVNVTAI	ATGGCAAAGATCAAAGGTCAAGTTAAGTGGTTCAACGAGTCTAAAGGTTTCGGTTTCATCACTCCAGCTGACGGCAGCAAAGATGTGTTCGTACACTTCTCTGCAATCCAGGGTAATGGCTTCAAAACCCTGGCTGAAGGCCAGAACGTAGAGTTCGAAATCCAAGACGGTCAGAAAGGTCCGTCTGCAGTAAACGTTACTGCAATCTAA
GCF_000834395.1_WP_004699966.1	METGTVKWFNNAKGFGFICPEGGGEDIFAHYSTIQMDGYRTLKAGQMVNFDVHQGPKGNHASLIVPLVLDVISPEAALQELSALA	ATGGAGACGGGTACTGTTAAATGGTTCAACAATGCCAAAGGTTTTGGCTTTATTTGCCCTGAGGGCGGCGGCGAAGATATCTTCGCTCACTATTCAACTATCCAGATGGATGGATACCGAACATTAAAAGCCGGTCAGATGGTTAATTTTGATGTTCATCAGGGGCCAAAAGGAAACCACGCCAGCCTGATTGTTCCACTTGTATTGGATGTAATATCACCTGAAGCCGCGCTACAGGAACTCTCTGCTTTAGCCTGA
GCF_000834395.1_WP_011817288.1	MSNKMTGLVKWFDAGKGFGFITPADGSKDVFVHFSAIQSNDFKTLDEGQKVEFSIESGAKGPSAVNVVAL	ATGTCTAATAAAATGACTGGTTTAGTAAAATGGTTTGACGCTGGTAAAGGTTTTGGTTTTATCACTCCTGCTGACGGCAGCAAAGATGTGTTCGTTCACTTCTCTGCTATCCAGAGCAATGATTTCAAAACCTTAGATGAAGGCCAAAAAGTGGAGTTCTCTATCGAGAGCGGCGCTAAAGGCCCATCAGCGGTAAACGTAGTCGCTCTGTAA
GCF_000834395.1_WP_042547095.1	MSNKMTGLVKWFNADKGFGFITPADGSKDVFVHFSAIQSNDFKTLDEGQKVEFSIESGAKGPAAANVVVL	ATGTCTAATAAAATGACTGGTTTAGTAAAATGGTTTAACGCTGATAAAGGTTTCGGTTTCATCACGCCTGCTGACGGCAGCAAAGATGTGTTCGTTCACTTCTCTGCTATCCAGAGCAATGATTTCAAAACCTTAGATGAAGGCCAAAAAGTGGAGTTCTCTATCGAGAGCGGCGCTAAAGGCCCAGCAGCGGCAAACGTTGTTGTGCTGTAA
GCF_000834395.1_WP_042547968.1	MSTKMTGLVKWFDAGKGFGFISPADGSKDVFVHFSAIQGNDYKTLDEGQNVEFSIEQGQKGPSAVNVVAL	ATGTCTACTAAAATGACTGGTTTAGTAAAATGGTTTGATGCTGGTAAAGGTTTTGGTTTTATTTCTCCTGCAGACGGTAGCAAAGATGTATTCGTACATTTCTCTGCAATCCAGGGTAATGATTACAAAACTCTTGATGAAGGCCAGAACGTTGAGTTCAGCATCGAGCAAGGCCAGAAAGGCCCTTCAGCTGTAAACGTTGTAGCACTGTAA
GCF_000834455.1_WP_002210893.1	MSNMMKGQVKWFNESKGFGFITPADGSKDVFVHFSAIQDQGFKTLAEGQNVQFSIENGAKGPSAANVTAI	ATGTCTAACATGATGAAAGGTCAAGTAAAGTGGTTCAACGAGTCTAAAGGCTTCGGTTTCATCACTCCAGCTGATGGCAGCAAAGACGTGTTCGTTCACTTCTCTGCAATCCAAGATCAAGGCTTCAAGACCCTGGCTGAAGGCCAGAATGTACAGTTCTCTATCGAGAACGGTGCTAAAGGTCCGTCTGCAGCAAACGTAACTGCAATCTAA
GCF_000834455.1_WP_002221949.1	MAKIKGQVKWFNESKGFGFITPADGSKDVFVHFSAIQGNGFKTLAEGQNVEFEIQDGQKGPSAVNVTAI	ATGGCAAAGATCAAAGGTCAAGTTAAGTGGTTCAACGAGTCTAAAGGTTTCGGTTTCATCACTCCAGCTGACGGCAGCAAAGATGTGTTCGTACACTTCTCTGCAATCCAGGGTAATGGCTTCAAAACCCTGGCTGAAGGCCAGAACGTAGAGTTCGAAATCCAAGACGGTCAGAAAGGTCCGTCTGCAGTAAACGTTACTGCAATCTAA
GCF_000834455.1_WP_004713318.1	MSKKTGQVKWFNEAKGFGFIEQHDGGKDVFVHFSAIATDGFKTLAEGQRVEYTIQDSPRGPAAANVIAL	ATGTCTAAGAAGACGGGGCAAGTTAAGTGGTTCAACGAAGCTAAAGGTTTTGGTTTTATTGAACAACATGATGGCGGTAAAGATGTGTTTGTTCACTTCTCCGCAATCGCAACCGATGGTTTCAAAACTTTGGCTGAAGGCCAGCGTGTTGAGTACACCATCCAAGACAGTCCGCGCGGGCCGGCTGCTGCAAACGTTATTGCTCTGTAA
GCF_000834455.1_WP_004713351.1	METGTVKWFNNAKGFGFICPEGGGEDIFAHYSTIQMDGYRTLKAGQMVNFDVHQGPKGNHACLIVPLEFDGVLQAAIPQELAALA	ATGGAGACGGGTACTGTTAAATGGTTCAACAATGCCAAAGGTTTTGGCTTTATTTGCCCTGAGGGCGGCGGCGAAGATATATTCGCCCACTATTCAACTATCCAGATGGATGGCTACCGCACGTTAAAAGCGGGTCAGATGGTTAACTTTGATGTCCATCAAGGGCCAAAAGGGAATCATGCTTGCCTGATTGTTCCACTCGAGTTTGATGGGGTATTGCAAGCAGCCATACCGCAGGAACTCGCTGCATTGGCCTGA
GCF_000834455.1_WP_004716300.1	MSKIKGSVKWFNEAKGFGFITPEDGSKDVFVHFSAIASNGFKTLAEGQRVEFEITSGAKGPSAANVIAI	ATGTCTAAGATTAAAGGTAGCGTTAAGTGGTTCAATGAAGCTAAAGGCTTTGGTTTCATCACCCCTGAAGATGGCAGTAAGGACGTTTTCGTTCATTTCTCAGCCATCGCTAGCAATGGTTTCAAAACGCTTGCTGAAGGCCAGCGTGTAGAGTTTGAAATCACGAGCGGTGCCAAAGGGCCATCTGCTGCTAATGTTATCGCTATCTAA
GCF_000834455.1_WP_025376799.1	MSNKMTGLVKWFNADKGFGFITPADGSKDVFVHFSAIQSNDFKTLDEGQKVEFSIESGAKGPAAVNVIAL	ATGTCTAATAAAATGACTGGTTTAGTAAAATGGTTTAACGCTGATAAAGGTTTCGGTTTCATCACTCCTGCTGATGGCAGCAAAGACGTGTTCGTTCACTTCTCTGCTATCCAGAGCAATGATTTCAAAACCTTAGATGAAGGCCAAAAAGTTGAGTTCTCTATCGAGAGCGGCGCTAAAGGCCCAGCAGCGGTAAACGTTATTGCTCTGTAA
GCF_000834455.1_WP_032816455.1	MSTKMTGLVKWFDAGKGFGFISPADGSKDVFVHFSAIQGTDYKTLDEGQNVEFSIEQGQKGPSAVNVVAL	ATGTCTACTAAAATGACTGGTTTAGTAAAATGGTTTGATGCAGGTAAAGGTTTTGGTTTTATTTCTCCAGCTGACGGCAGCAAAGATGTTTTCGTACATTTTTCTGCAATCCAGGGTACTGATTATAAAACTCTTGATGAAGGCCAGAACGTAGAGTTCAGCATCGAGCAAGGCCAGAAAGGCCCTTCAGCTGTAAACGTAGTAGCTCTGTAA
GCF_000834455.1_WP_042542321.1	MSTKMTGLVKWFDAGKGFGFITPADGSKDVFVHFSAIQSNDFKTLDEGQKVEFSIESGAKGPSAVNVIAL	ATGTCTACTAAAATGACTGGTTTAGTAAAATGGTTTGACGCTGGTAAAGGTTTCGGTTTCATCACTCCTGCTGATGGCAGCAAAGACGTGTTCGTTCACTTCTCTGCTATCCAGAGCAATGATTTCAAAACCTTAGATGAAGGCCAAAAAGTTGAGTTCTCTATCGAGAGCGGCGCTAAAGGCCCATCAGCGGTAAACGTTATTGCTCTGTAA
GCF_000931575.1_WP_005652728.1	MEIGIVKWFNNAKGFGFISAEGVDADIFAHYSVIEMDGYRSLKAGQKVQFEVLHSDKGSHATKIIPIADTQE	ATGGAAATTGGTATTGTAAAATGGTTCAATAATGCAAAAGGATTTGGTTTCATTTCCGCAGAAGGTGTAGATGCCGATATTTTTGCACATTATTCAGTGATTGAAATGGACGGCTATCGTTCATTAAAAGCGGGTCAAAAAGTACAATTTGAAGTTCTCCACAGCGATAAAGGATCTCACGCCACAAAAATAATCCCAATTGCGGATACTCAAGAATAA
GCF_000934605.2_WP_010807119.1	MATGTVKWFNDAKGFGFITPDEGGEDLFAHFSAIQMNGFKTLKEGQKVQFEVVQGPKGKQASNIQAAA	ATGGCAACCGGTACGGTCAAATGGTTTAACGACGCCAAGGGTTTTGGTTTCATCACGCCGGATGAGGGTGGCGAAGATCTGTTCGCTCACTTCTCGGCGATCCAGATGAACGGTTTCAAGACCCTGAAGGAAGGTCAGAAGGTTCAGTTCGAGGTCGTACAAGGCCCGAAGGGCAAGCAGGCTTCGAACATCCAGGCAGCCGCCTGA
GCF_000934605.2_WP_039399001.1	MATGTVKWFNDAKGFGFITPDEGGEDLFAHFSEIQAKGFKSLQENQKVSFEVKMGPKGRQASNIQPI	ATGGCAACTGGTACCGTCAAGTGGTTCAACGACGCCAAGGGTTTTGGTTTTATTACGCCGGACGAAGGTGGTGAAGATCTCTTCGCTCACTTCTCGGAAATCCAGGCAAAGGGCTTCAAGTCCCTGCAAGAAAACCAGAAGGTCAGCTTCGAAGTGAAGATGGGACCGAAGGGCCGTCAAGCCAGCAACATCCAGCCCATCTAA
GCF_000940995.1_WP_036830632.1	MSKATGIVKWFNDEKGFGFITQDNGGADVFVHFRAIAGEGFKSLAEGQKVSFDIEQGQKGPQAANVERI	ATGTCTAAAGCAACTGGTATCGTTAAGTGGTTCAACGACGAGAAAGGTTTTGGTTTCATCACTCAAGACAACGGCGGTGCTGACGTATTCGTTCACTTCCGTGCTATCGCTGGTGAAGGCTTCAAATCTCTAGCTGAAGGCCAGAAAGTATCTTTCGACATCGAACAAGGTCAGAAAGGTCCTCAAGCTGCTAACGTTGAGCGCATCTAA
GCF_000940995.1_WP_039459846.1	MATGTVKWFNNAKGFGFICPETGEGDIFAHYSTIQMDGYRTLKAGQQVNYTVETGPKGFHAKEIVPVEGEAVK	ATGGCAACAGGTACAGTTAAATGGTTTAATAACGCTAAGGGATTTGGTTTTATCTGCCCTGAGACAGGCGAAGGCGATATTTTCGCCCATTATTCAACTATTCAGATGGATGGTTACCGTACACTCAAGGCTGGTCAACAGGTCAACTATACCGTTGAGACAGGGCCAAAAGGGTTCCATGCCAAGGAGATCGTTCCCGTTGAAGGTGAAGCCGTAAAATAA
GCF_000940995.1_WP_039466278.1	MSKSTGIVKWFNEEKGFGFITQENGGADVFVHFRAIASEGFKTLSEGQKVSFDVEQGQKGPQAANVVTL	ATGTCTAAGTCTACTGGTATCGTTAAGTGGTTTAACGAAGAAAAAGGTTTCGGTTTCATCACTCAAGAGAACGGCGGTGCAGACGTATTCGTACACTTCCGCGCAATCGCTTCTGAAGGTTTCAAGACTCTTTCTGAAGGTCAGAAAGTTTCTTTTGACGTAGAGCAAGGCCAGAAAGGTCCTCAAGCTGCAAACGTAGTTACTCTATAA
GCF_000940995.1_WP_082060516.1	MSNKTTGSVKWFDETKGFGFITPDNGSADVFVHFRAIATDGFKTLAEGQKVAFNVEQGGKGPQAANVTLA	ATGTCAAATAAGACAACAGGTTCAGTAAAGTGGTTTGACGAAACGAAAGGTTTTGGTTTTATCACTCCAGATAATGGTAGTGCTGATGTTTTTGTTCACTTCAGAGCTATCGCTACAGATGGTTTCAAAACGTTGGCTGAAGGCCAAAAAGTAGCTTTTAATGTAGAGCAGGGTGGCAAAGGCCCACAAGCTGCGAACGTTACTTTAGCTTAA
GCF_000954135.1_WP_045220077.1	MATGTVKWFNDAKGFGFITPDDGGEDLFAHFSAINMQGFKTLKEGQKVSFEVTQGPKGKQASNIQAA	ATGGCTACTGGTACCGTCAAGTGGTTCAACGACGCAAAGGGTTTTGGCTTCATTACCCCGGATGATGGCGGCGAGGACCTTTTCGCTCATTTCTCCGCGATCAACATGCAGGGTTTCAAAACCCTGAAGGAAGGTCAAAAGGTGTCGTTTGAAGTCACCCAAGGCCCGAAGGGCAAGCAAGCCTCGAATATCCAGGCGGCTTAA
GCF_000959365.1_WP_004196460.1	MATGIVKWFNDAKGFGFITPDEGGEDLFAHFSAINMQGFKTLKEGQKVSFEVVQGPKGKQASNIQAA	ATGGCAACTGGTATTGTCAAATGGTTCAATGACGCGAAGGGCTTCGGCTTCATCACGCCCGACGAAGGCGGCGAAGATCTGTTTGCACATTTCTCGGCGATCAACATGCAGGGCTTCAAGACCCTGAAGGAAGGCCAAAAGGTCAGCTTCGAGGTTGTGCAGGGCCCGAAGGGTAAGCAGGCGTCGAACATCCAAGCTGCTTGA
GCF_000959365.1_WP_010106722.1	MATGTVKWFNDAKGFGFITPEGGGEDLFAHFSEIRSEGFKTLQENQKVEFEVKTGPKGLQAANIKPL	ATGGCAACCGGCACCGTCAAGTGGTTCAACGACGCTAAGGGTTTTGGTTTCATCACCCCGGAAGGCGGCGGCGAAGACCTCTTCGCGCATTTCTCGGAAATCCGCAGCGAAGGCTTCAAGACGCTGCAAGAGAACCAGAAGGTCGAGTTCGAAGTGAAGACCGGCCCGAAGGGTCTGCAAGCAGCGAACATCAAGCCGCTGTAA
GCF_000959505.1_WP_004196460.1	MATGIVKWFNDAKGFGFITPDEGGEDLFAHFSAINMQGFKTLKEGQKVSFEVVQGPKGKQASNIQAA	ATGGCAACTGGTATTGTCAAATGGTTCAACGACGCGAAGGGCTTCGGTTTCATCACCCCCGACGAGGGCGGTGAAGATCTGTTTGCGCACTTCTCGGCCATCAACATGCAGGGTTTCAAGACCCTGAAGGAAGGCCAGAAGGTGAGCTTCGAGGTCGTCCAAGGGCCGAAGGGCAAGCAAGCGTCGAACATCCAGGCCGCGTAA
GCF_000959505.1_WP_006477070.1	MATGTVKWFNDAKGFGFITPEGGGDDLFAHFSEIRVEGFKTLQENQKVEFEVKTGPKGLQAANIRPV	ATGGCAACCGGTACCGTCAAGTGGTTCAATGACGCAAAGGGCTTCGGCTTCATCACCCCGGAAGGCGGCGGCGACGATCTGTTCGCGCACTTCTCGGAAATCCGCGTCGAAGGCTTCAAGACGCTGCAAGAAAACCAGAAGGTCGAATTCGAAGTGAAGACGGGCCCGAAGGGTCTGCAAGCTGCGAACATCCGCCCGGTTTAA
GCF_000961095.1_WP_028599014.1	MQGKVKWFNAEKGYGFIETEQGGDVFVHFSAIQSEGFKTLEEGQSVEFDIVEGARGPQAANVVKL	ATGCAAGGTAAAGTTAAATGGTTTAACGCAGAAAAAGGCTATGGATTCATCGAGACTGAGCAAGGCGGCGACGTTTTTGTTCATTTCTCCGCAATCCAATCCGAAGGCTTCAAAACCCTCGAAGAAGGCCAATCGGTCGAATTCGACATCGTTGAAGGCGCTCGCGGTCCACAAGCTGCTAACGTAGTCAAACTGTAA
GCF_000961095.1_WP_045668821.1	MTGTVKWFNAEKGYGFIQVDNGDDVFVHYSAIQGDGFKSLEEGQSVEFDITEGNRGPQAANVIKL	TTGACAGGAACAGTTAAGTGGTTTAACGCAGAAAAAGGCTACGGATTTATCCAAGTTGACAACGGTGACGACGTATTCGTTCACTACTCCGCGATCCAAGGCGATGGCTTCAAGTCCCTTGAAGAAGGTCAATCGGTTGAATTCGACATCACAGAAGGCAACCGCGGTCCGCAAGCGGCTAACGTAATCAAGTTATAA
GCF_000961515.1_WP_007180251.1	METGTVKWFNDAKGFGFITPDGGGEDLFAHFSEIRTEGFKTLQENQKVTFEVKTGPKGKQAANIKPV	ATGGAAACCGGTACCGTCAAGTGGTTCAATGACGCAAAGGGCTTTGGCTTCATCACGCCGGACGGCGGCGGCGAAGATCTGTTCGCGCATTTCTCGGAAATCCGCACGGAAGGCTTCAAGACGCTGCAAGAAAACCAAAAGGTTACGTTTGAAGTGAAGACGGGCCCGAAGGGCAAGCAAGCTGCTAACATCAAGCCGGTGTAA
GCF_000961515.1_WP_007180614.1	MATGTVKWFNDAKGFGFITPDEGGEDLFAHFSAIQMNGFKTLKEGQKVTFEVVQGPKGKQASNIQAPA	ATGGCAACTGGTACGGTCAAATGGTTCAATGACGCAAAAGGTTTCGGATTCATCACGCCTGACGAAGGTGGTGAGGATCTGTTTGCACACTTCTCGGCCATCCAGATGAATGGGTTCAAGACCCTCAAGGAAGGTCAAAAAGTAACCTTCGAGGTCGTGCAAGGCCCGAAAGGCAAACAGGCATCGAACATCCAGGCACCTGCCTGA
GCF_000968175.1_WP_045957727.1	MSNTMTGLVKWFNNDKGFGFISPKDGSKDVFVHYSAIQSNDFKSLDEGQEVSFTIEKGMKGPAAANVVVL	ATGTCCAATACAATGACTGGTTTAGTAAAATGGTTTAATAACGATAAAGGCTTCGGTTTTATCTCTCCAAAAGATGGCAGCAAAGATGTGTTCGTTCACTATTCTGCAATCCAAAGTAATGATTTCAAAAGCTTAGACGAAGGCCAGGAAGTTTCATTTACCATCGAAAAAGGTATGAAAGGTCCAGCTGCTGCAAATGTGGTAGTGCTCTAA
GCF_000968175.1_WP_045958351.1	MAKITGTVKWFNESKGFGFITPANGSKDVFVHFSAIVKDGFKTLSEGQQVEFEIQEGPKGPAAANVSAL	ATGGCAAAAATCACTGGTACTGTGAAGTGGTTCAACGAGTCTAAAGGTTTTGGTTTTATTACCCCTGCGAATGGTAGCAAAGATGTATTTGTACATTTTTCTGCAATTGTGAAAGATGGGTTTAAAACATTATCTGAAGGCCAACAAGTTGAGTTTGAAATTCAGGAAGGCCCGAAAGGTCCTGCTGCTGCAAACGTTTCAGCTTTATAG
GCF_000968175.1_WP_045958852.1	MSDKMKGQVKWFNESKGFGFITPADGSKDVFVHFSAIQGNGFKTLAEGQDVEFTIESGAKGPAAANVTAI	ATGTCTGACAAAATGAAAGGTCAAGTGAAGTGGTTCAACGAATCTAAAGGCTTTGGTTTCATCACTCCAGCCGATGGTAGCAAAGATGTATTCGTACATTTCTCTGCTATCCAAGGTAACGGCTTCAAAACACTGGCAGAAGGCCAGGATGTGGAGTTCACCATTGAAAGTGGTGCCAAAGGCCCAGCAGCAGCAAACGTAACTGCTATCTAA
GCF_000968175.1_WP_045958943.1	METGTVKWFNNAKGFGFICPASGGEDIFAHYSTIQMDGYRTLKAGQTVNFSVNHGPKGNHASLIVPVDNGSKPKQERDSTNA	ATGGAAACAGGTACTGTTAAATGGTTCAATAATGCAAAGGGCTTTGGATTTATTTGCCCGGCCAGCGGAGGCGAAGATATTTTCGCTCACTATTCAACCATTCAAATGGATGGTTATAGAACATTGAAAGCTGGGCAGACAGTGAATTTTAGCGTTAATCATGGCCCCAAGGGTAATCACGCCAGCTTGATTGTTCCTGTAGACAATGGTTCAAAACCCAAACAAGAACGCGACTCGACAAATGCGTAA
GCF_000968175.1_WP_045959114.1	MSKVKGNVKWFNESKGFGFITPEDGSKDVFVHFSAIQTNGFKTLAEGQKVEFDIAEGEKGPSAANVVAI	ATGTCAAAAGTTAAAGGTAACGTTAAGTGGTTTAATGAATCCAAAGGATTCGGTTTTATCACGCCAGAAGATGGTAGCAAAGATGTTTTTGTACACTTTTCCGCCATTCAAACTAACGGATTCAAGACGCTGGCTGAAGGCCAAAAAGTAGAGTTTGATATTGCTGAGGGTGAGAAAGGTCCATCTGCTGCGAACGTTGTCGCAATCTAA
GCF_000968195.1_WP_045969514.1	MSKIKGNVKWFNESKGFGFITPEDGSKDVFVHFSAIQSNGFKTLAEGQKVEFEITEGAKGPSAANVVAI	ATGTCTAAAATTAAAGGTAACGTTAAGTGGTTTAATGAATCCAAAGGATTCGGTTTTATCACTCCAGAAGATGGTAGCAAAGATGTTTTCGTACACTTTTCCGCCATTCAGTCTAACGGATTCAAGACTCTGGCTGAAGGCCAAAAAGTAGAGTTTGAAATCACTGAGGGTGCGAAAGGTCCATCTGCTGCGAACGTTGTCGCAATCTAA
GCF_000968195.1_WP_045969932.1	METGTVKWFNNAKGFGFICPASGGEDIFAHYSTIQMDGYRTLKAGQKVNFSVNQGPKGNHASLIVPLEDGLKSKNSNSINS	ATGGAAACAGGTACTGTGAAATGGTTCAATAATGCAAAGGGCTTTGGATTTATTTGCCCGGCCAGTGGGGGCGAGGATATATTTGCTCACTATTCAACCATTCAGATGGATGGTTATAGGACGCTGAAAGCGGGGCAAAAGGTGAATTTTAGCGTTAATCAAGGCCCTAAGGGTAACCACGCCAGCCTTATTGTGCCTCTGGAAGATGGCTTAAAATCAAAAAATAGTAACTCGATAAACTCGTAA
GCF_000968195.1_WP_045971136.1	MSDKMKGQVKWFNESKGFGFITPADGSKDVFVHFSAIQGNGFKTLAEGQNVEFTIEDGAKGPAAANVTAI	ATGTCTGACAAAATGAAAGGTCAAGTGAAGTGGTTCAACGAATCTAAAGGCTTTGGTTTCATCACTCCAGCTGATGGTAGCAAAGACGTATTCGTGCACTTCTCTGCCATTCAAGGTAACGGTTTCAAAACTTTGGCAGAAGGCCAGAATGTAGAATTCACCATTGAAGATGGTGCTAAAGGCCCAGCAGCAGCAAACGTAACTGCTATCTAA
GCF_000968195.1_WP_045971240.1	MAKITGTVKWFNESKGFGFITPTDGSKDVFVHFSAIVKDGFKTLSEGQQVEFEIQDGPKGPAAANVTTL	ATGGCAAAAATCACTGGTACTGTGAAGTGGTTCAACGAGTCTAAAGGTTTTGGTTTTATTACTCCAACCGATGGTAGCAAAGATGTATTTGTACATTTTTCTGCAATTGTAAAAGATGGGTTTAAAACATTGTCTGAAGGCCAACAAGTTGAGTTTGAAATTCAGGATGGCCCTAAAGGTCCTGCTGCTGCAAACGTCACAACTTTATAG
GCF_000971765.1_WP_022564767.1	MSKIKGNVKWFNESKGFGFITPEDGSKDVFVHFSAIQSNGFKTLVEGQRVEFEITDGAKGPSAANVTAL	ATGTCCAAAATTAAAGGTAACGTTAAATGGTTTAACGAATCTAAAGGGTTCGGTTTCATAACTCCAGAAGATGGTAGCAAAGATGTTTTTGTACATTTTTCTGCTATTCAGAGCAATGGCTTTAAAACTTTAGTTGAAGGTCAGCGCGTTGAGTTTGAAATTACTGATGGCGCAAAAGGTCCGTCTGCTGCTAACGTTACTGCTCTATAA
GCF_000972785.3_WP_039400870.1	MATGTVKWFNDAKGFGFITPDEGGEDLFAHFSAIQMNGFKTLKEGQKVQFEVVQGPKGKQASNITAPN	ATGGCAACCGGTACGGTCAAATGGTTTAACGATGCCAAGGGTTTTGGTTTCATCACGCCGGACGAAGGTGGCGAAGATCTGTTCGCTCACTTCTCGGCGATCCAGATGAATGGATTCAAGACCCTGAAGGAAGGTCAGAAGGTTCAGTTCGAGGTCGTCCAAGGCCCGAAGGGCAAGCAGGCTTCGAACATCACGGCTCCGAACTGA
GCF_000972785.3_WP_046291647.1	MATGTVKWFNDAKGFGFITPDEGGEDLFAHFSEIQAKGFKSLQENQKVSFEVKNGPKGRQASNIQPI	ATGGCAACTGGTACCGTCAAGTGGTTCAACGACGCCAAGGGTTTTGGTTTTATTACGCCGGACGAAGGCGGTGAAGATCTCTTCGCTCACTTCTCGGAAATCCAAGCGAAGGGCTTCAAGTCGCTGCAAGAAAACCAGAAGGTCAGCTTCGAAGTGAAGAACGGACCGAAGGGCCGTCAAGCCAGCAACATCCAGCCCATCTAA
GCF_000973505.1_WP_046288909.1	MAKIKGQVKWFNESKGFGFITPADGSKDVFVHFSAIQGNGFKTLSEGQSVEFEVQDGQKGPSAVNVVAL	ATGGCAAAAATTAAAGGTCAAGTTAAGTGGTTTAATGAGTCTAAGGGTTTTGGTTTTATTACTCCTGCAGATGGCAGTAAAGATGTGTTTGTGCATTTTTCTGCTATTCAAGGCAATGGTTTTAAAACTTTATCTGAAGGACAGAGTGTGGAATTTGAAGTACAGGATGGTCAAAAAGGTCCATCAGCTGTTAATGTAGTAGCCTTATAA
GCF_000973545.1_WP_046305106.1	MAKIKGQVKWFNESKGFGFITPVDGSKDVFVHFSAIQGNGFKTLSEGQNVEFEIQDGQKGPSAVNVITL	ATGGCAAAAATAAAAGGTCAAGTAAAATGGTTTAATGAATCTAAAGGTTTTGGTTTTATTACTCCGGTGGATGGTAGTAAGGATGTGTTTGTTCATTTTTCTGCAATTCAAGGTAATGGTTTTAAGACATTGTCTGAAGGACAAAATGTAGAATTTGAAATACAAGATGGACAAAAAGGTCCGTCAGCTGTTAATGTAATTACCTTATAA
GCF_000981585.1_WP_019911834.1	MKGTVKWFNAEKGYGFLQVEGGEDVFVHFSAIQGDGFKTLDEGQAVEFDITDGNRGPQAANVVKL	TTGAAAGGTACAGTAAAATGGTTTAACGCAGAAAAAGGCTATGGTTTTCTTCAAGTAGAAGGCGGCGAAGATGTATTCGTTCACTTCTCAGCAATCCAAGGTGACGGATTCAAGACTTTGGATGAAGGCCAAGCGGTAGAATTCGATATTACTGATGGTAACCGCGGTCCCCAAGCAGCTAACGTAGTTAAATTATAA
GCF_000981585.1_WP_019914582.1	MQTGTVKWFNAEKGFGFIEVEGGSDVFVHFSAITGDGFKTLDEGQRVEFNVVQGNRGPQAENVVKL	ATGCAAACAGGTACAGTTAAATGGTTCAACGCAGAAAAAGGATTCGGTTTCATCGAAGTTGAAGGCGGAAGCGACGTATTCGTTCACTTCAGCGCTATTACTGGCGACGGCTTCAAAACTTTGGACGAAGGCCAACGCGTTGAATTCAACGTTGTTCAAGGCAACCGTGGACCACAAGCCGAAAACGTTGTAAAACTGTAA
GCF_000981585.1_WP_019915069.1	MEGKVKWFNAEKGYGFIETADGGDVFVHFSAIQTDGFKTLDEGQSVEFDIVEGARGPQAANVIKL	ATGGAAGGTAAAGTTAAATGGTTTAACGCAGAAAAAGGTTATGGTTTCATCGAAACTGCCGACGGTGGCGACGTATTCGTACACTTCTCCGCGATTCAAACTGATGGTTTCAAAACATTGGATGAAGGCCAATCCGTGGAGTTCGACATCGTTGAAGGTGCACGCGGACCACAAGCAGCTAACGTCATCAAATTATAA
GCF_000981585.1_WP_020425942.1	MQTGTVKWFNADKGFGFIEVEGGSDVFVHFSAITGDGFKSLDEGQRVEFNVTEGARGPQAENVVKL	ATGCAAACAGGTACAGTTAAATGGTTCAACGCAGACAAAGGTTTCGGTTTTATCGAGGTTGAAGGCGGAAGTGACGTATTCGTACATTTCTCCGCAATCACTGGCGACGGTTTCAAGTCTTTGGACGAAGGCCAACGCGTTGAGTTCAACGTAACTGAAGGCGCTCGTGGACCACAAGCCGAAAACGTTGTAAAACTGTAA
GCF_001005905.1_WP_017548994.1	MKQGTVKWFNAEKGFGFIEIEGENDVFVHFSAINQEGYKSLEEGQSVEFEVVEGDRGPQAANVVKL	ATGAAACAAGGTACAGTAAAATGGTTCAACGCAGAAAAAGGTTTTGGCTTCATCGAAATTGAAGGCGAAAACGACGTATTCGTTCACTTCTCAGCTATCAACCAAGAGGGCTACAAATCCCTTGAAGAAGGTCAATCAGTTGAATTTGAAGTAGTTGAAGGCGACCGCGGCCCACAAGCTGCAAACGTTGTTAAACTCTAA
GCF_001006005.1_WP_002210315.1	MSKIKGSVKWFNESKGFGFITPEDGSKDVFVHFSAIASNGFKTLAEGQRVEFEITNGAKGPSAANVIAI	ATGTCTAAGATTAAAGGTAGCGTTAAGTGGTTTAATGAATCTAAAGGTTTCGGTTTCATTACTCCAGAAGATGGTAGCAAGGACGTTTTCGTTCACTTCTCTGCCATCGCTAGCAATGGTTTCAAAACTCTTGCTGAAGGCCAGCGTGTAGAATTTGAAATCACGAACGGTGCCAAAGGGCCATCTGCTGCTAACGTTATCGCTATCTAA
GCF_001006005.1_WP_002221949.1	MAKIKGQVKWFNESKGFGFITPADGSKDVFVHFSAIQGNGFKTLAEGQNVEFEIQDGQKGPSAVNVTAI	ATGGCAAAGATCAAAGGTCAAGTTAAGTGGTTCAACGAGTCTAAAGGTTTCGGTTTCATCACCCCAGCTGACGGCAGCAAAGACGTGTTCGTACACTTCTCTGCAATCCAGGGTAACGGTTTCAAAACCCTGGCTGAAGGCCAGAACGTTGAGTTCGAAATCCAAGATGGCCAGAAAGGCCCATCTGCAGTAAACGTTACTGCAATCTAA
GCF_001006005.1_WP_004946278.1	MSNMIKGQVKWFNESKGFGFITPADGSKDVFVHFSAIQDQGFKTLAEGQNVQFSIENGAKGPSAANVTAI	ATGTCTAACATGATCAAAGGTCAAGTGAAGTGGTTCAACGAGTCTAAAGGTTTTGGTTTCATCACTCCTGCAGACGGCAGCAAAGACGTGTTCGTACACTTCTCTGCAATCCAGGATCAAGGCTTCAAGACCCTGGCTGAAGGCCAGAACGTACAGTTCTCTATCGAGAACGGTGCTAAAGGTCCGTCAGCGGCTAACGTTACCGCTATCTAA
GCF_001006005.1_WP_021804914.1	MSKKTGQVKWFNESKGFGFIEQQDGGKDVFVHFSAIMTEGFKTLAEGQRVEYTIQDSPRGPAAANVVAL	ATGTCTAAGAAGACTGGTCAGGTTAAGTGGTTCAACGAAAGTAAAGGTTTTGGTTTCATTGAACAACAAGATGGCGGCAAAGATGTATTCGTACACTTCTCTGCAATCATGACCGAAGGTTTCAAGACTCTGGCAGAAGGCCAGCGTGTTGAGTATACCATTCAGGACAGCCCGCGCGGGCCGGCTGCCGCCAACGTTGTTGCTCTGTAA
GCF_001006005.1_WP_021804952.1	METGTVKWFNNAKGFGFICPEGGGEDIFAHYSTIKMDGYRTLKAGQQVRFDVHQGPKGNHASLIMPLESEAMA	ATGGAGACGGGTACTGTTAAATGGTTCAATAACGCCAAAGGGTTCGGCTTTATCTGCCCGGAAGGCGGCGGTGAAGATATCTTCGCGCATTATTCAACAATTAAAATGGATGGCTACCGAACGTTGAAAGCGGGCCAACAGGTCAGGTTTGACGTACATCAAGGGCCGAAAGGGAACCACGCGAGCCTGATTATGCCGCTGGAAAGCGAGGCAATGGCCTAA
GCF_001006005.1_WP_024485401.1	MSNKMTGLVKWFDAGKGFGFISPADGSKDVFVHFSAIQGNDYKTLDEGQQVEFSIENGAKGPSAVNVTAM	ATGTCTAATAAAATGACTGGTTTAGTAAAATGGTTTGACGCTGGTAAAGGTTTTGGTTTCATTTCTCCTGCTGATGGCAGCAAAGACGTGTTCGTACACTTCTCTGCAATCCAGGGTAATGATTACAAGACGCTTGATGAAGGCCAGCAGGTTGAATTCAGCATCGAAAATGGCGCCAAAGGCCCATCAGCAGTTAACGTTACAGCAATGTAA
GCF_001007935.1_WP_046851028.1	MATGTVKWFNDSKGFGFITPDDGSEDLFAHFSAINMTGFKTLKEGQKVSFEVTQGPKGKQASNIQAA	ATGGCAACAGGTACAGTAAAATGGTTCAATGACTCCAAAGGGTTCGGTTTTATCACTCCTGATGATGGTAGCGAGGATTTATTTGCACATTTCTCCGCAATCAATATGACAGGTTTTAAAACCCTGAAGGAAGGCCAGAAAGTGAGCTTTGAAGTTACACAAGGACCCAAAGGGAAACAGGCTTCAAACATTCAGGCTGCCTAA
GCF_001010285.1_WP_010847246.1	MSDKMKGQVKWFNESKGFGFITPADGSKDVFVHFSAIQGNGFKTLAEGQNVEFTIENGAKGPAAANVTAI	ATGTCTGACAAAATGAAAGGTCAAGTGAAGTGGTTCAACGAGTCTAAAGGCTTCGGTTTCATCACCCCAGCTGATGGTAGCAAAGACGTATTCGTTCACTTCTCTGCCATTCAGGGTAACGGTTTCAAAACTTTGGCAGAAGGCCAGAACGTAGAATTCACCATTGAAAATGGTGCTAAAGGCCCAGCAGCAGCAAACGTAACTGCTATCTGA
GCF_001010285.1_WP_011147003.1	MAKITGTVKWFNESKGFGFITPADGSKDVFVHFSAIQSEGFKTLAEGQKVEFEIQDGQKGPSAANVTAA	ATGGCAAAAATCACTGGTACTGTAAAGTGGTTCAACGAATCTAAAGGTTTTGGTTTTATTACTCCCGCTGATGGCAGCAAAGATGTGTTTGTACATTTTAGCGCTATTCAGAGCGAAGGTTTTAAAACTTTGGCGGAAGGTCAAAAAGTTGAGTTTGAAATTCAGGACGGTCAGAAAGGTCCTTCCGCGGCAAACGTTACAGCAGCATAA
GCF_001010285.1_WP_021323071.1	MSKIKGNVKWFNESKGFGFITPEDGSKDVFVHFSAIQSNGFKTLAEGQKVEFEITDGAKGPSAVNVVAI	ATGTCAAAAATTAAAGGTAACGTTAAGTGGTTTAATGAATCTAAAGGATTCGGGTTTATCACTCCAGAAGATGGTAGCAAAGACGTATTTGTGCATTTCTCTGCTATTCAGAGCAACGGATTTAAAACTCTGGCAGAAGGTCAAAAGGTAGAGTTTGAAATCACTGACGGCGCTAAAGGTCCATCTGCTGTAAACGTTGTCGCTATCTGA
GCF_001010285.1_WP_046973791.1	MSSAMTGSVKWFNNDKGFGFISPKDGSKDVFVHYSAIQSNNFKTLEEGQEVSFSIENGAKGPSAVNVIVLS	ATGTCTAGTGCAATGACTGGTTCAGTAAAATGGTTTAATAACGATAAAGGTTTTGGCTTTATTTCTCCGAAAGATGGTAGCAAAGACGTTTTTGTTCATTATTCTGCAATTCAGAGCAATAATTTCAAAACGCTGGAAGAAGGACAGGAAGTTTCATTCTCTATTGAGAATGGTGCTAAAGGTCCATCAGCGGTAAATGTTATCGTATTATCTTGA
GCF_001010285.1_WP_046975650.1	METGTVKWFNNAKGFGFICPASGGEDIFAHYSTIQMDGYRTLKAGQKVHFSIHQGPKGNHASIIVPLENESKGQIA	ATGGAGACAGGTACTGTTAAGTGGTTCAATAATGCTAAGGGCTTTGGGTTTATTTGTCCGGCAAGCGGCGGAGAAGATATATTCGCTCATTACTCAACCATTCAGATGGACGGTTACCGGACTCTGAAAGCAGGCCAGAAGGTGCATTTCAGCATTCACCAAGGCCCAAAGGGAAATCATGCCAGCATTATTGTTCCCCTTGAAAACGAATCCAAAGGCCAGATAGCCTGA
GCF_001017775.3_WP_047216006.1	MALGTVKWFNDAKGFGFITPDEGGEDLFAHFSAIQMNGFKTLKEGQRVSFEVVQGPKGKQASNIQAAP	ATGGCACTCGGTACGGTGAAATGGTTCAACGATGCCAAAGGGTTCGGTTTTATTACCCCGGATGAAGGCGGCGAGGACCTCTTTGCGCATTTTTCTGCGATCCAAATGAACGGGTTCAAAACCTTGAAGGAAGGCCAGCGCGTCTCTTTCGAAGTGGTGCAGGGCCCGAAAGGCAAGCAAGCGTCGAACATTCAGGCAGCGCCCTGA
GCF_001022135.1_WP_001062678.1	MAKIKGQVKWFNESKGFGFITPADGSKDVFVHFSAIQGNGFKTLAEGQNVEFEIQDGQKGPAAVNVTAI	ATGGCAAAGATTAAAGGTCAAGTTAAGTGGTTCAACGAGTCCAAAGGTTTTGGTTTCATTACTCCTGCTGACGGCAGCAAAGATGTATTCGTACACTTCTCTGCAATCCAGGGTAACGGCTTCAAAACTCTGGCCGAAGGCCAGAACGTTGAGTTTGAAATTCAGGACGGCCAGAAAGGCCCGGCAGCTGTTAACGTAACTGCTATCTAA
GCF_001022135.1_WP_012542460.1	MSKIKGNVKWFNESKGFGFITPEDGSKDVFVHFSAIQSNGFKTLAEGQRVEFEITNGAKGPSAANVMAI	ATGTCTAAGATTAAAGGTAACGTTAAGTGGTTTAATGAATCCAAAGGATTCGGTTTCATTACTCCGGAAGATGGCAGCAAAGACGTGTTCGTACACTTCTCTGCAATCCAGAGCAATGGTTTCAAAACTCTGGCTGAAGGTCAGCGTGTAGAGTTCGAAATCACTAACGGTGCCAAAGGTCCTTCTGCTGCTAACGTAATGGCTATCTAA
GCF_001022135.1_WP_016495754.1	MSNKMTGLVKWFNSDKGFGFITPDDGSKDVFVHFSAIQSDSYKTLDEGQKVSFTIESGAKGPAAGNVTAL	ATGTCTAACAAAATGACTGGTTTAGTAAAATGGTTTAACTCCGATAAAGGTTTTGGCTTTATCACTCCTGACGACGGCAGCAAAGATGTCTTTGTTCATTTCTCTGCTATCCAGAGCGACAGCTACAAAACGCTTGATGAAGGTCAGAAAGTTTCCTTCACTATCGAAAGTGGCGCGAAAGGCCCTGCGGCTGGTAACGTCACCGCGCTGTAA
GCF_001022135.1_WP_039078525.1	METGTVKWFNNAKGFGFICPEGGGEDIFAHYSTIQMDGYRTLKAGQTVRFDVHQGPKGNHASLIVPVEAEAVA	ATGGAAACGGGTACTGTCAAGTGGTTCAATAATGCCAAAGGGTTTGGTTTCATCTGCCCCGAAGGCGGCGGCGAAGATATCTTCGCACATTACTCCACCATTCAGATGGATGGTTACAGAACGTTAAAAGCCGGGCAAACTGTCCGGTTTGATGTACATCAGGGCCCTAAAGGCAATCATGCCAGTCTCATCGTGCCTGTAGAAGCAGAAGCCGTCGCCTGA
GCF_001022135.1_WP_047369396.1	MSSKTTGNVKWFNPEKGFGFITPKDGSKDVFVHFSAIQSNEFKTLEENQEVEFSVENGPKGLSAINVVIL	ATGTCTTCAAAAACGACAGGTAACGTAAAGTGGTTCAACCCTGAAAAAGGCTTTGGTTTTATCACTCCAAAAGATGGCAGCAAAGATGTATTCGTGCATTTTTCTGCAATTCAAAGTAATGAATTTAAAACGCTTGAAGAAAATCAAGAAGTTGAATTCTCAGTCGAAAACGGCCCGAAAGGTCTTTCGGCTATTAATGTAGTTATACTTTAA
GCF_001027285.1_WP_047854840.1	MATGTVKWFNDAKGFGFITQDGGGEDLFCHHSAIQSDGFRSLQEGQKVEFDVARGPKGLQAQNVRPS	ATGGCAACTGGTACCGTGAAGTGGTTCAACGACGCGAAGGGCTTCGGATTCATCACGCAGGACGGCGGGGGCGAGGACCTCTTCTGCCACCACAGCGCGATCCAGTCCGATGGCTTCCGCTCCCTGCAGGAAGGGCAGAAGGTCGAGTTCGACGTCGCCCGCGGCCCCAAGGGCCTGCAGGCGCAGAACGTTCGCCCCTCCTGA
GCF_001027285.1_WP_047856399.1	MATGTVKWFNDAKGFGFIAPDAGGEDVFCHHSAINMDGFRSLAEGQKVEYEVTKGPKGLQAQNVRPAG	ATGGCAACCGGTACCGTGAAGTGGTTCAACGACGCGAAGGGCTTTGGGTTCATCGCGCCGGATGCGGGTGGCGAGGATGTGTTTTGCCACCACTCCGCCATCAACATGGATGGCTTCCGCTCCCTGGCTGAGGGCCAGAAGGTGGAGTACGAAGTGACCAAGGGCCCCAAGGGCCTTCAGGCGCAGAACGTGCGCCCGGCGGGGTGA
GCF_001027285.1_WP_047857541.1	MATGTVKWFNDAKGFGFITQDGGGEDVFCHHSAINMDGFRTLAEGQRVEFEVTKGPKGLQAQNVRPA	ATGGCAACTGGTACCGTGAAGTGGTTCAACGATGCGAAGGGCTTCGGATTCATCACGCAGGATGGCGGTGGCGAGGACGTGTTCTGCCACCACTCCGCCATCAACATGGATGGGTTCCGCACCCTGGCCGAGGGCCAGCGGGTCGAGTTCGAAGTGACCAAGGGCCCCAAGGGCCTGCAGGCGCAGAACGTGCGCCCGGCGTAA
GCF_001028665.1_WP_006477070.1	MATGTVKWFNDAKGFGFITPEGGGDDLFAHFSEIRVEGFKTLQENQKVEFEVKTGPKGLQAANIRPV	ATGGCAACCGGTACCGTCAAGTGGTTCAATGACGCAAAGGGCTTCGGCTTCATCACCCCGGAAGGCGGCGGCGACGATCTGTTCGCGCACTTCTCGGAAATCCGCGTCGAAGGCTTCAAGACGCTGCAAGAAAACCAGAAGGTTGAATTCGAAGTGAAGACGGGCCCGAAGGGTCTGCAAGCTGCGAACATCCGTCCGGTCTAA
GCF_001028665.1_WP_006478030.1	MATGIVKWFNDAKGFGFITPDEGGEDLFAHFSAITMNGFKTLKEGQKVSFDVVQGPKGKQASNIQAA	ATGGCAACTGGTATCGTTAAGTGGTTCAACGACGCGAAGGGCTTCGGTTTCATCACTCCCGACGAGGGCGGTGAGGATCTGTTTGCTCACTTCTCGGCTATCACCATGAATGGCTTCAAGACGCTGAAGGAAGGCCAGAAGGTGAGCTTTGACGTCGTTCAAGGACCGAAGGGCAAGCAAGCGTCGAACATCCAGGCCGCATAA
GCF_001029105.3_WP_010807119.1	MATGTVKWFNDAKGFGFITPDEGGEDLFAHFSAIQMNGFKTLKEGQKVQFEVVQGPKGKQASNIQAAA	ATGGCAACCGGTACGGTCAAATGGTTTAACGATGCCAAGGGTTTTGGTTTCATCACGCCGGACGAGGGTGGCGAAGATCTGTTCGCTCACTTCTCGGCGATCCAGATGAACGGTTTCAAGACCCTGAAGGAAGGTCAGAAGGTTCAGTTCGAGGTCGTTCAAGGCCCGAAGGGCAAGCAGGCTTCGAACATCCAGGCAGCCGCCTGA
GCF_001029105.3_WP_039399001.1	MATGTVKWFNDAKGFGFITPDEGGEDLFAHFSEIQAKGFKSLQENQKVSFEVKMGPKGRQASNIQPI	ATGGCAACTGGTACCGTCAAGTGGTTCAACGACGCCAAGGGTTTTGGTTTTATTACGCCGGACGAAGGCGGTGAAGATCTCTTCGCCCACTTCTCGGAAATCCAGGCAAAGGGCTTCAAGTCCCTGCAGGAAAACCAGAAGGTCAGCTTCGAAGTGAAGATGGGACCGAAGGGCCGTCAAGCCAGCAACATCCAGCCCATCTAA
GCF_001042715.1_WP_044823653.1	MKTGKVKWFNAEKGFGFIEVEGGDDVFVHFTAITGDGFKTLEEGQSVEFDVVQGNRGPQAENVVKL	ATGAAAACAGGAAAAGTTAAATGGTTTAACGCTGAAAAAGGATTTGGATTTATTGAAGTAGAAGGTGGAGACGATGTATTCGTTCATTTCACTGCAATTACTGGTGACGGTTTTAAAACTTTAGAAGAAGGTCAAAGTGTTGAATTTGACGTTGTTCAAGGAAATCGTGGACCACAAGCTGAGAACGTTGTAAAATTATAA
GCF_001050115.1_WP_003355029.1	MERGTVKWFNAEKGYGFIESDSGSDVFVHYSAIQGEGYKTLEEGQQVEFEVVQGNRGPQAEHVVKL	ATGGAACGAGGCACTGTTAAATGGTTTAATGCTGAAAAAGGATACGGATTTATCGAATCTGATAGTGGATCCGATGTATTTGTTCATTACAGCGCCATTCAAGGAGAAGGATATAAGACGTTGGAAGAAGGACAACAAGTGGAGTTTGAAGTGGTTCAAGGAAATCGTGGACCTCAGGCAGAACATGTAGTCAAACTATAA
GCF_001050115.1_WP_003355070.1	MQNGKVKWFNNEKGYGFIEVEGGDDVFVHFTAIQGDGYKSLEEGQAVSFEIVEGNRGPQAANVVKL	ATGCAAAACGGTAAAGTAAAATGGTTTAACAATGAAAAAGGCTATGGGTTTATTGAAGTTGAAGGCGGAGACGACGTATTCGTTCATTTCACAGCTATTCAAGGTGACGGTTACAAATCACTTGAAGAAGGTCAAGCAGTTTCTTTCGAAATCGTTGAAGGTAACCGCGGACCACAAGCTGCTAATGTTGTAAAACTTTAA
GCF_001050475.1_WP_048703627.1	MEQGTVKWFNPDKGFGFITREDGSDVFAHFSAIQGDGFKTLDEGQHVTFDVEDGERGPQAANIVKD	ATGGAACAAGGTACAGTTAAATGGTTTAACCCTGATAAAGGTTTTGGTTTTATTACTCGCGAAGATGGTAGTGACGTATTTGCTCACTTCTCAGCTATCCAAGGAGACGGATTCAAGACTTTGGACGAAGGTCAACACGTAACATTCGACGTAGAAGACGGCGAACGTGGACCACAAGCTGCTAACATCGTTAAAGACTAA
GCF_001050475.1_WP_048705854.1	MEQGTVKWFNAEKGYGFITREDGSDVFVHFSAIQGDGYKTLEEGQAVTFDIEDSDRGPQASNVVKN	ATGGAACAAGGAACAGTTAAATGGTTTAACGCCGAAAAAGGCTATGGTTTTATTACACGCGAAGATGGTAGTGATGTATTCGTACATTTCTCAGCCATCCAAGGTGACGGTTACAAGACACTAGAAGAAGGTCAAGCAGTAACATTTGACATCGAAGATAGTGATCGTGGACCACAAGCTTCAAACGTTGTTAAAAACTAA
GCF_001051995.2_WP_002924494.1	MATGTVKWFNDSKGFGFITPDDGSEDLFAHFSAINMSGFKSLKEGEKVSFEVTQGPKGKQASNIQRA	ATGGCAACTGGCACCGTGAAGTGGTTCAACGATTCCAAGGGTTTTGGTTTCATCACGCCCGATGATGGCAGTGAGGACCTGTTTGCGCATTTCTCCGCCATCAACATGAGCGGTTTCAAGAGCCTGAAAGAGGGTGAAAAGGTTTCCTTCGAGGTGACCCAGGGCCCCAAGGGCAAGCAGGCTTCCAACATCCAGCGCGCCTGA
GCF_001186155.3_WP_065524612.1	MQEGTVKWFNSEKGFGFIEVEGGDDVFVHFSAIEGEGFKTLDEGQRVEFQVEEGNRGPQATNVTKA	ATGCAAGAAGGAACAGTAAAATGGTTTAACTCAGAAAAAGGCTTTGGTTTTATCGAAGTTGAAGGTGGAGACGATGTATTCGTACATTTCTCAGCAATCGAAGGCGAAGGGTTTAAAACGCTTGATGAAGGGCAACGTGTTGAATTTCAAGTAGAAGAAGGCAACCGTGGACCACAAGCAACAAACGTAACTAAAGCCTAA
GCF_001187595.1_WP_003398700.1	MNTGKVKWFNAEKGFGFIETDGGTDVFVHFTAIQGTGFKTLEEGEKVTFDIVNGNRGPQAANVQKA	ATGAACACAGGTAAAGTAAAATGGTTTAACGCAGAAAAAGGTTTTGGATTCATTGAGACGGACGGAGGTACAGACGTATTCGTTCACTTCACAGCGATCCAAGGTACTGGATTCAAAACGTTGGAAGAAGGCGAAAAAGTAACATTTGACATCGTGAATGGCAACCGTGGGCCGCAAGCGGCAAACGTCCAAAAAGCATAA
GCF_001187595.1_WP_003398931.1	MQNGKVKWFNNEKGYGFIEVEGGDDVFVHFTAIQGEGYKTLEEGQAVSFEIVQGNRGPQAANVVKL	ATGCAAAACGGTAAAGTAAAATGGTTTAACAACGAAAAAGGTTACGGATTCATCGAAGTTGAAGGCGGAGACGATGTATTCGTACACTTCACAGCAATCCAAGGTGAAGGCTACAAAACGTTAGAAGAAGGTCAAGCTGTTTCTTTTGAAATCGTTCAAGGAAACCGTGGCCCTCAAGCTGCAAACGTAGTGAAATTATAA
GCF_001191605.1_WP_003215784.1	MQNGKVKWFNNEKGFGFIEVEGGDDVFVHFTAIEGDGYKSLEEGQEVSFEIVEGNRGPQAANVTKI	ATGCAAAACGGTAAAGTAAAATGGTTCAATAATGAAAAAGGTTTCGGCTTCATTGAAGTTGAAGGCGGAGACGACGTATTCGTTCACTTCACAGCTATCGAAGGTGACGGTTACAAATCTCTAGAAGAAGGACAAGAAGTTTCTTTTGAAATCGTTGAAGGTAATCGTGGACCTCAAGCTGCAAACGTAACAAAAATCTAA
GCF_001191605.1_WP_008349061.1	MLEGKVKWFNSEKGFGFIEVEGQDDVFVHFSAIQGEGFKTLEEGQSVSFEIVEGNRGPQAANVNKA	ATGTTAGAAGGTAAAGTAAAATGGTTCAACTCTGAAAAAGGTTTCGGATTCATCGAAGTAGAAGGTCAAGACGATGTATTCGTTCACTTCTCTGCTATCCAAGGCGAAGGCTTCAAAACTTTAGAAGAAGGTCAATCAGTTTCTTTCGAAATCGTTGAAGGTAACCGTGGACCACAAGCTGCTAACGTTAACAAAGCGTAA
GCF_001267925.1_WP_009665919.1	MATGTVKWFNDSKGFGFITPDDGGEDLFAHFSAIQMNGFKTLKEGQKVQFEVTQGPKGKQASNIQAP	ATGGCAACAGGTACAGTCAAGTGGTTCAACGATTCTAAAGGCTTCGGCTTTATCACTCCGGATGACGGCGGTGAAGATTTGTTCGCACACTTCTCGGCAATTCAAATGAACGGCTTCAAGACCCTCAAAGAAGGTCAAAAAGTACAGTTCGAAGTCACGCAAGGCCCCAAAGGCAAGCAAGCTTCCAACATCCAGGCTCCTTAA
GCF_001267925.1_WP_053197264.1	MATGIVKWFNDSKGFGFITPDEGGEDLFAHFSAIQSNGFKSLKENQRVSFEVTTGPKGKQASNIVPQ	ATGGCAACTGGTATCGTAAAGTGGTTCAATGACTCGAAGGGCTTCGGCTTCATCACTCCTGACGAAGGCGGCGAAGATCTGTTCGCGCACTTCTCGGCTATCCAATCGAACGGCTTCAAGTCCCTGAAAGAAAACCAACGCGTTTCTTTCGAAGTGACTACTGGTCCTAAGGGCAAGCAAGCTTCGAACATCGTCCCGCAATAA
GCF_001277175.1_WP_002439184.1	MSKIKGNVKWFNESKGFGFITPEDGSKDVFVHFSAIQSNGFKTLAEGQRVEFEITNGAKGPSAANVIAL	ATGTCTAAGATTAAAGGTAACGTTAAGTGGTTTAATGAATCCAAAGGATTCGGTTTCATTACTCCGGAAGATGGCAGCAAAGACGTGTTCGTACACTTCTCTGCGATCCAGAGCAATGGTTTCAAAACTCTGGCTGAAGGTCAGCGTGTAGAGTTCGAAATCACTAACGGTGCCAAAGGCCCTTCTGCTGCTAACGTAATCGCTCTGTAA
GCF_001277175.1_WP_004386389.1	MSDKMTGLVKWFNAEKGFGFITPDNGSKDVFVHFSAIQNNGFKTLEEGQKVSFSVESGAKGPAAANVTAI	ATGTCTGACAAAATGACTGGTTTAGTAAAATGGTTTAACGCGGAAAAAGGTTTTGGCTTCATCACTCCGGACAACGGCAGCAAGGACGTTTTCGTTCACTTCTCCGCTATCCAGAACAACGGCTTCAAAACCCTGGAAGAAGGCCAGAAGGTCTCTTTCTCCGTTGAAAGCGGCGCGAAAGGCCCGGCAGCTGCGAACGTAACTGCTATCTAA
GCF_001277175.1_WP_004386688.1	MAKIKGQVKWFNESKGFGFITPADGSKDVFVHFSAIQGNGFKTLAEGQNVEFEIQDGQKGPAAVNVVAI	ATGGCAAAGATTAAAGGTCAAGTTAAGTGGTTCAACGAATCTAAAGGTTTTGGTTTCATTACTCCTGCTGACGGCAGCAAAGATGTGTTTGTACACTTCTCTGCAATCCAGGGTAATGGTTTCAAAACTCTGGCTGAAGGCCAGAACGTTGAGTTCGAGATTCAGGACGGCCAGAAAGGTCCGGCAGCTGTTAACGTAGTTGCTATCTAA
GCF_001277175.1_WP_007696560.1	MANRMNGSVKWFNADKGFGFIAPSDGSKDVFVHFSAIQSDNFRTLTEGQQVEFSVENGAKGPSAVNVVAL	ATGGCTAACAGAATGAATGGTTCAGTGAAATGGTTTAACGCGGATAAAGGCTTTGGTTTTATCGCACCGTCTGACGGCAGCAAAGATGTTTTCGTCCACTTTTCCGCAATCCAGAGCGATAATTTTCGCACGCTGACCGAAGGCCAGCAGGTTGAATTCTCGGTTGAAAACGGCGCGAAAGGCCCGTCAGCCGTGAATGTGGTGGCGCTTTAA
GCF_001277175.1_WP_007707404.1	METGTVKWFNNAKGFGFICPEGGGEDIFAHYSTIQMDGYRTLKAGQVVRFDVHQGPKGNHASVIVPLEAEAAPAVA	ATGGAGACGGGTACTGTTAAATGGTTCAATAACGCCAAAGGGTTTGGGTTCATCTGCCCTGAAGGCGGCGGCGAAGATATCTTCGCGCACTACTCTACAATCCAGATGGACGGCTACAGAACGCTGAAAGCCGGACAAGTCGTGAGGTTCGATGTACATCAGGGTCCCAAAGGCAACCATGCCAGCGTCATTGTCCCTCTTGAAGCAGAAGCCGCACCCGCAGTTGCGTAA
GCF_001277195.1_WP_002439184.1	MSKIKGNVKWFNESKGFGFITPEDGSKDVFVHFSAIQSNGFKTLAEGQRVEFEITNGAKGPSAANVIAL	ATGTCTAAGATTAAAGGTAACGTTAAGTGGTTTAATGAATCCAAAGGATTCGGTTTCATTACTCCGGAAGATGGCAGCAAAGACGTGTTCGTACACTTCTCTGCGATCCAGAGCAATGGTTTCAAAACTCTGGCTGAAGGTCAGCGTGTAGAGTTCGAAATCACTAACGGTGCCAAAGGCCCTTCTGCTGCTAACGTAATCGCTCTGTAA
GCF_001277195.1_WP_004386688.1	MAKIKGQVKWFNESKGFGFITPADGSKDVFVHFSAIQGNGFKTLAEGQNVEFEIQDGQKGPAAVNVVAI	ATGGCAAAGATTAAAGGTCAAGTTAAGTGGTTCAACGAATCTAAAGGTTTTGGTTTCATTACTCCGGCTGACGGCAGCAAAGATGTGTTCGTACACTTCTCTGCTATTCAGGGTAATGGCTTCAAAACTCTGGCTGAAGGCCAGAACGTTGAGTTCGAGATTCAGGACGGCCAGAAAGGTCCGGCAGCTGTTAACGTAGTTGCTATCTAA
GCF_001277195.1_WP_007664616.1	METGTVKWFNNAKGFGFICPEGGGEDIFAHYSTIQMDGYRTLKAGQVVRFDVHQGPKGNHASVIVPLEAEVASAVA	ATGGAGACGGGTACTGTTAAATGGTTCAATAACGCCAAAGGGTTCGGGTTTATCTGCCCTGAAGGCGGCGGCGAAGATATCTTCGCGCACTACTCTACAATCCAGATGGACGGCTACAGAACGCTGAAAGCCGGACAAGTCGTGAGGTTCGATGTACATCAGGGTCCCAAAGGCAACCATGCCAGCGTTATTGTCCCTCTTGAAGCAGAAGTCGCATCCGCAGTTGCGTAA
GCF_001277195.1_WP_038863444.1	MANRISGSVKWFNADKGFGFIAPADGSKDVFVHFSAIQSDNFRTLTEGQQVEFSVENGAKGPSAVNVVAL	ATGGCTAACAGAATCAGTGGTTCAGTGAAATGGTTTAACGCGGATAAAGGCTTTGGTTTTATCGCACCGGCAGACGGCAGCAAAGACGTGTTCGTTCACTTTTCCGCTATCCAGAGCGACAATTTTCGCACGCTGACCGAAGGTCAGCAGGTTGAATTCTCGGTTGAAAACGGCGCTAAAGGCCCGTCAGCCGTGAATGTGGTGGCGCTTTAA
GCF_001277195.1_WP_038867051.1	MSDKMTGLVKWFNAEKGFGFITPDNGSKDVFVHFSAIQNNGFKTLEEGQKVTFSVENGAKGPAAANVTAI	ATGTCTGATAAAATGACTGGTTTAGTAAAATGGTTTAACGCGGAAAAAGGTTTTGGCTTCATCACTCCGGACAACGGCAGCAAGGACGTTTTCGTTCACTTCTCCGCTATCCAGAACAACGGCTTCAAAACCCTGGAAGAAGGCCAGAAGGTCACTTTCTCCGTTGAAAACGGCGCGAAAGGCCCGGCAGCTGCTAACGTAACTGCTATCTAA
GCF_001277215.2_WP_002439184.1	MSKIKGNVKWFNESKGFGFITPEDGSKDVFVHFSAIQSNGFKTLAEGQRVEFEITNGAKGPSAANVIAL	ATGTCTAAGATTAAAGGTAACGTTAAGTGGTTTAATGAATCCAAAGGATTCGGTTTCATTACTCCGGAAGATGGCAGCAAAGACGTGTTCGTACACTTCTCTGCGATCCAGAGCAATGGTTTCAAAACTCTGGCTGAAGGTCAGCGTGTAGAGTTCGAAATCACTAACGGTGCCAAAGGCCCTTCTGCTGCTAACGTAATCGCTCTGTAA
GCF_001277215.2_WP_004385765.1	MANRMNGSVKWFNADKGFGFIAPADGSKDVFVHFSAIQSDNFRTLTEGQQVEFSVENGAKGPSAVNVVAL	ATGGCTAACAGAATGAATGGTTCAGTGAAATGGTTTAACGCGGATAAAGGCTTTGGTTTTATCGCACCGGCAGACGGCAGCAAAGATGTGTTCGTCCATTTCTCCGCTATCCAGAGCGATAACTTTCGCACGCTGACCGAAGGCCAGCAGGTTGAATTCTCGGTTGAAAACGGTGCTAAAGGCCCGTCAGCCGTGAATGTGGTGGCGCTCTAA
GCF_001277215.2_WP_004386389.1	MSDKMTGLVKWFNAEKGFGFITPDNGSKDVFVHFSAIQNNGFKTLEEGQKVSFSVESGAKGPAAANVTAI	ATGTCTGACAAAATGACTGGTTTAGTAAAATGGTTTAACGCGGAAAAAGGTTTCGGCTTCATCACTCCGGACAACGGCAGCAAGGACGTTTTCGTTCACTTCTCCGCTATCCAGAACAACGGCTTCAAAACCCTGGAAGAAGGCCAGAAGGTCTCTTTCTCCGTTGAAAGCGGCGCGAAAGGCCCGGCAGCTGCGAACGTAACTGCCATCTAA
GCF_001277215.2_WP_004386688.1	MAKIKGQVKWFNESKGFGFITPADGSKDVFVHFSAIQGNGFKTLAEGQNVEFEIQDGQKGPAAVNVVAI	ATGGCAAAGATTAAAGGTCAAGTTAAGTGGTTCAACGAATCTAAAGGTTTTGGTTTCATTACTCCTGCTGACGGCAGCAAAGACGTGTTCGTACACTTCTCTGCAATCCAGGGTAATGGCTTCAAAACTCTGGCTGAAGGCCAGAACGTTGAGTTCGAGATTCAGGACGGTCAGAAAGGTCCGGCAGCTGTTAACGTAGTTGCTATCTAA
GCF_001277215.2_WP_007782474.1	METGTVKWFNNAKGFGFICPEGGGEDIFAHYSTIQMDGYRTLKAGQVVRFDVHQGPKGNHASVIVPLEAEATSAVA	ATGGAGACGGGTACTGTTAAATGGTTCAATAACGCCAAAGGGTTTGGGTTCATTTGCCCTGAAGGCGGCGGCGAAGATATCTTTGCGCACTACTCTACAATCCAGATGGACGGCTACAGAACGCTGAAAGCCGGACAAGTCGTGAGGTTCGATGTGCATCAGGGGCCTAAGGGCAACCATGCCAGCGTCATTGTTCCTCTTGAAGCAGAAGCCACATCCGCAGTTGCGTAA
GCF_001277235.1_WP_002439184.1	MSKIKGNVKWFNESKGFGFITPEDGSKDVFVHFSAIQSNGFKTLAEGQRVEFEITNGAKGPSAANVIAL	ATGTCTAAGATTAAAGGTAACGTTAAGTGGTTTAATGAATCCAAAGGATTCGGTTTCATTACTCCGGAAGATGGCAGCAAAGACGTGTTCGTACACTTCTCTGCGATCCAGAGCAATGGTTTCAAAACTCTGGCTGAAGGTCAGCGTGTAGAGTTCGAAATCACTAACGGTGCCAAAGGCCCTTCTGCTGCTAACGTAATCGCTCTGTAA
GCF_001277235.1_WP_004386389.1	MSDKMTGLVKWFNAEKGFGFITPDNGSKDVFVHFSAIQNNGFKTLEEGQKVSFSVESGAKGPAAANVTAI	ATGTCTGATAAAATGACTGGTTTAGTAAAATGGTTTAACGCGGAAAAAGGTTTTGGCTTCATTACTCCGGACAACGGCAGCAAGGACGTTTTCGTTCACTTCTCCGCTATCCAGAACAACGGCTTCAAAACCCTGGAAGAAGGCCAGAAGGTCTCTTTCTCCGTTGAAAGCGGCGCGAAAGGCCCGGCAGCTGCGAACGTAACTGCTATCTAA
GCF_001277235.1_WP_004386688.1	MAKIKGQVKWFNESKGFGFITPADGSKDVFVHFSAIQGNGFKTLAEGQNVEFEIQDGQKGPAAVNVVAI	ATGGCAAAGATTAAAGGTCAAGTTAAGTGGTTCAACGAATCTAAAGGTTTTGGTTTCATTACTCCGGCTGACGGCAGCAAAGATGTGTTTGTACACTTCTCTGCCATCCAGGGTAATGGCTTCAAAACTCTGGCTGAAGGCCAGAACGTTGAGTTCGAGATTCAGGACGGTCAGAAAGGTCCGGCAGCTGTTAACGTAGTTGCTATCTAA
GCF_001277235.1_WP_007664616.1	METGTVKWFNNAKGFGFICPEGGGEDIFAHYSTIQMDGYRTLKAGQVVRFDVHQGPKGNHASVIVPLEAEVASAVA	ATGGAGACGGGTACTGTTAAATGGTTCAATAACGCCAAAGGGTTTGGGTTCATCTGCCCTGAAGGCGGCGGCGAAGATATCTTCGCGCACTACTCTACAATCCAGATGGACGGCTACAGAACGCTGAAAGCCGGACAAGTCGTGAGGTTCGATGTACATCAGGGTCCCAAAGGCAACCATGCCAGCGTCATTGTCCCTCTTGAAGCAGAAGTCGCATCCGCAGTTGCGTAA
GCF_001277235.1_WP_007711250.1	MANRMNGSVKWFNADKGFGFIAPADGSKDVFVHFSAIQGDNYRSLTEGQQVEFSVENGAKGPSAVNVVAL	ATGGCTAACAGAATGAATGGTTCAGTGAAATGGTTTAACGCGGATAAAGGTTTTGGTTTTATCGCGCCGGCAGATGGCAGCAAAGATGTGTTTGTCCATTTCTCCGCAATCCAGGGCGATAATTATCGTTCGCTGACCGAAGGGCAGCAGGTTGAATTCTCGGTTGAAAACGGCGCTAAAGGCCCGTCAGCCGTGAACGTGGTGGCGCTTTAA
GCF_001277235.1_WP_007720208.1	MSNKMTGLVKWFNADKGFGFITPNDGSKDVFVHFSAIQSDNFKTLDEGQQVSFTIENGAKGPAAGNVTPL	ATGTCTAACAAAATGACTGGTTTAGTAAAATGGTTTAACGCTGATAAAGGTTTTGGTTTTATCACCCCGAATGACGGCAGCAAAGATGTGTTTGTACACTTCTCTGCTATCCAGAGCGACAATTTCAAAACGCTTGATGAAGGCCAGCAGGTCTCCTTCACCATTGAAAATGGCGCTAAAGGCCCGGCAGCAGGCAATGTGACGCCGCTGTAA
GCF_001277255.1_WP_002439184.1	MSKIKGNVKWFNESKGFGFITPEDGSKDVFVHFSAIQSNGFKTLAEGQRVEFEITNGAKGPSAANVIAL	ATGTCTAAGATTAAAGGTAACGTTAAGTGGTTTAATGAATCCAAAGGATTCGGTTTCATTACTCCGGAAGATGGCAGCAAAGACGTGTTCGTACACTTCTCTGCGATCCAGAGCAATGGTTTCAAAACTCTGGCTGAAGGTCAGCGTGTAGAGTTCGAAATCACTAACGGTGCCAAAGGCCCTTCTGCTGCTAACGTAATCGCTCTGTAA
GCF_001277255.1_WP_004386688.1	MAKIKGQVKWFNESKGFGFITPADGSKDVFVHFSAIQGNGFKTLAEGQNVEFEIQDGQKGPAAVNVVAI	ATGGCAAAGATTAAAGGTCAAGTTAAGTGGTTCAACGAGTCTAAAGGTTTTGGTTTCATTACTCCGGCTGACGGTAGCAAAGATGTGTTTGTACACTTCTCTGCAATCCAGGGTAATGGCTTCAAAACTCTGGCTGAAGGCCAGAACGTTGAGTTCGAGATTCAGGACGGTCAGAAAGGTCCGGCAGCTGTTAACGTAGTTGCTATCTAA
GCF_001277255.1_WP_007664616.1	METGTVKWFNNAKGFGFICPEGGGEDIFAHYSTIQMDGYRTLKAGQVVRFDVHQGPKGNHASVIVPLEAEVASAVA	ATGGAGACGGGTACTGTTAAATGGTTCAATAACGCCAAAGGGTTTGGGTTTATTTGTCCTGAAGGCGGCGGCGAGGATATCTTCGCGCACTACTCTACTATCCAGATGGACGGCTACAGAACGCTGAAAGCCGGACAAGTCGTGAGGTTCGATGTACATCAGGGTCCCAAAGGCAACCATGCCAGCGTTATTGTCCCTCTTGAAGCAGAAGTTGCATCCGCAGTTGCGTAA
GCF_001277255.1_WP_007670849.1	MANRMNGSVKWFNSDKGFGFIAPADGSKDVFVHFSAIQSDNYRSLSEGQQVEFSVENGAKGPSAVNVVAL	ATGGCTAACAGAATGAATGGTTCAGTGAAATGGTTTAACTCGGATAAAGGCTTTGGTTTTATCGCTCCGGCTGACGGTAGTAAAGATGTGTTCGTACACTTCTCTGCAATCCAGAGCGATAATTATCGCTCGCTGAGTGAAGGCCAGCAGGTAGAATTCTCGGTTGAAAATGGTGCCAAAGGCCCGTCAGCCGTGAACGTGGTGGCGCTTTAA
GCF_001277255.1_WP_007671833.1	MSDKMTGLVKWFNAEKGFGFITPDNGSKDVFVHFSAIQNNGFKTLEEGQKVSFSVENGAKGPAAANVTAI	ATGTCTGACAAAATGACTGGTTTAGTAAAATGGTTTAACGCGGAAAAAGGTTTCGGCTTCATTACTCCGGACAACGGCAGCAAGGACGTTTTCGTTCACTTCTCCGCTATCCAGAACAACGGCTTCAAAACCCTGGAAGAAGGCCAGAAGGTCTCTTTCTCCGTTGAAAACGGCGCGAAAGGCCCGGCAGCTGCTAACGTAACTGCTATCTAA
GCF_001307805.1_WP_010529359.1	MMTGTVKWFNAEKGFGFIEREEGDDVFVHFSAINAEGFKTLEDGQNVEFEIVEGNRGPQAANVTAV	ATGATGACTGGAACAGTAAAATGGTTTAACGCTGAAAAAGGCTTTGGTTTCATTGAGCGCGAAGAGGGAGACGACGTATTCGTTCATTTCTCAGCAATCAATGCAGAAGGTTTCAAAACACTTGAAGATGGTCAAAACGTTGAATTCGAAATCGTTGAAGGAAACCGCGGACCACAAGCAGCTAACGTTACAGCTGTTTAA
GCF_001307805.1_WP_068442417.1	MENGVVKWFNAEKGYGFIQVEEGNDVFVHYSAIQEEGFKTLEEGQNVTFDIVEGDRGPQAANVVKQ	ATGGAAAACGGCGTAGTAAAATGGTTTAATGCGGAAAAAGGCTATGGCTTCATTCAGGTAGAAGAAGGAAATGACGTATTCGTTCATTATTCAGCTATCCAGGAAGAAGGCTTCAAAACACTTGAAGAAGGACAAAACGTAACATTTGATATTGTGGAAGGCGATCGCGGTCCACAAGCAGCAAATGTTGTAAAACAATAA
GCF_001411805.1_WP_004196460.1	MATGIVKWFNDAKGFGFITPDEGGEDLFAHFSAINMQGFKTLKEGQKVSFEVVQGPKGKQASNIQAA	ATGGCAACTGGTATCGTCAAGTGGTTCAATGACGCGAAGGGCTTCGGCTTCATTACGCCCGATGAAGGCGGCGAAGATCTGTTTGCACATTTCTCGGCCATCAACATGCAGGGTTTCAAGACCCTGAAGGAAGGCCAGAAGGTGAGCTTCGAGGTCGTCCAAGGCCCGAAGGGCAAGCAGGCTTCGAATATCCAGGCAGCCTGA
GCF_001411805.1_WP_012734504.1	MATGTVKWFNDAKGFGFITPEGGGDDLFAHFSEIRVDGFKTLQENQKVEFEVKTGPKGLQAANIKPL	ATGGCAACCGGCACCGTCAAGTGGTTCAACGACGCTAAGGGTTTTGGCTTCATCACGCCGGAAGGCGGCGGCGACGATCTGTTCGCGCACTTCTCGGAAATCCGTGTCGACGGTTTCAAGACGCTGCAAGAAAACCAGAAGGTCGAATTCGAAGTGAAGACTGGCCCGAAGGGTCTGCAAGCAGCGAACATCAAGCCGCTGTAA
GCF_001421015.2_WP_017813838.1	MKGTVKWFNAEKGFGFIEVEGSEDVFVHFSAIQGDGFKTLDEGQAVEFDITEGNRGPQAANVVKL	GTGAAAGGTACAGTTAAATGGTTCAACGCAGAAAAAGGTTTCGGTTTCATCGAAGTTGAAGGTAGCGAAGATGTATTCGTACACTTCTCTGCAATTCAAGGCGACGGTTTCAAAACTTTGGACGAAGGCCAAGCAGTAGAGTTCGATATTACTGAAGGTAACCGTGGTCCTCAAGCAGCTAACGTTGTAAAATTATAA
GCF_001421015.2_WP_017813974.1	MQTGTVKWFNAEKGFGFIEVEGGNDVFVHFSAIQGDGFKTLDEGQRVEFNVVEGNRGPQAENVVKL	ATGCAAACAGGTACAGTAAAATGGTTTAACGCAGAAAAAGGTTTTGGTTTCATCGAGGTTGAAGGTGGCAACGATGTATTCGTTCACTTCTCCGCTATCCAAGGTGACGGCTTCAAAACTTTGGACGAAGGCCAACGCGTAGAATTCAACGTAGTTGAAGGAAACCGTGGACCACAAGCTGAAAACGTTGTAAAACTGTAA
GCF_001421015.2_WP_017815470.1	MQGKVKWFNAEKGYGFIETDEGGDVFVHFSAIQSEGFKTLEEGQSVEFDIVEGARGPQAANVIKL	ATGCAAGGTAAAGTAAAATGGTTTAACGCAGAAAAAGGTTACGGCTTCATCGAGACAGACGAAGGCGGAGACGTATTTGTACACTTTTCCGCAATCCAGTCCGAAGGTTTCAAGACGCTTGAAGAAGGCCAATCCGTAGAGTTCGACATCGTCGAAGGCGCGCGTGGACCTCAAGCAGCTAACGTTATCAAATTATAA
GCF_001444405.1_WP_058029684.1	MACGKVKWFNNAKGFGFIVEDGSEEDIFAHYSTIVMDGYKTLKAGQDVTFELQQGPKGLHATNIAPREIELA	ATGGCTTGCGGAAAAGTCAAATGGTTCAATAACGCCAAAGGGTTTGGTTTCATCGTAGAAGACGGCAGTGAAGAAGATATCTTCGCCCATTACTCAACGATTGTGATGGATGGATACAAAACACTTAAAGCCGGTCAGGATGTAACCTTCGAATTGCAACAAGGCCCTAAAGGTCTACATGCAACAAACATCGCTCCTAGAGAGATTGAACTCGCTTGA
GCF_001444425.1_WP_058021677.1	MAMGQVKWFNNAKGFGFILPEDGGSDLFAHYSAIGMDGYKTLKAGQTVTFETLEGPKGLHATNIKPVAQSQQQA	ATGGCAATGGGGCAAGTTAAATGGTTCAACAACGCTAAAGGTTTTGGTTTTATCCTTCCGGAGGACGGTGGCAGCGACCTTTTCGCTCACTACTCTGCTATTGGAATGGATGGCTATAAAACTCTGAAAGCCGGTCAAACCGTAACCTTTGAAACCCTGGAAGGTCCGAAAGGGCTTCATGCAACCAACATCAAACCTGTGGCACAGTCGCAGCAACAAGCCTGA
GCF_001455205.1_WP_013646657.1	MATGTVKWFNDSKGFGFITPDDGSEDLFAHFSAINMSGFKTLKEGQKVSFDVTQGPKGKQASNIQAT	ATGGCAACAGGTACAGTAAAATGGTTCAATGATTCTAAAGGTTTTGGTTTTATTACTCCTGATGACGGTAGCGAGGATTTGTTTGCACACTTCTCGGCAATCAATATGTCTGGTTTTAAAACCCTTAAAGAAGGTCAAAAAGTGAGCTTTGATGTCACTCAGGGACCAAAAGGGAAACAAGCCTCAAATATCCAGGCCACCTAA
GCF_001456255.1_WP_014231319.1	MATGTVKWFNNAKGFGFICSDEEEGDIFAHYSTIQMDGYRTLKAGQQVSYEIEKGPKGCHASSVVPIEDQAK	ATGGCTACAGGTACAGTAAAGTGGTTTAACAATGCCAAAGGATTTGGGTTTATCTGTTCTGACGAAGAAGAAGGAGATATCTTTGCCCACTACTCAACTATCCAGATGGACGGTTATCGTACACTGAAAGCAGGCCAACAAGTCTCATACGAGATAGAAAAAGGTCCAAAAGGTTGTCACGCAAGCAGCGTAGTACCGATTGAAGACCAAGCGAAATAA
GCF_001456255.1_WP_014234032.1	MSNKTTGSVKWFNETKGFGFLTQDNGGADVFVHFRAIVSDGFKTLAEGQKVTFEVEQGQKGLQAANVEVA	ATGTCTAATAAAACAACTGGTTCTGTAAAATGGTTCAACGAAACTAAAGGTTTTGGTTTCCTAACTCAAGACAACGGCGGCGCAGACGTATTCGTTCACTTCCGTGCAATCGTTTCTGACGGTTTCAAAACTCTTGCTGAAGGTCAAAAAGTGACTTTCGAAGTAGAGCAAGGCCAAAAAGGTCTTCAAGCTGCTAACGTTGAAGTAGCATAA
GCF_001461805.1_WP_000034826.1	MSKIKGNVKWFNESKGFGFITPEDGSKDVFVHFSAIQTNGFKTLAEGQRVEFEITNGAKGPSAANVTAL	ATGTCTAAGATTAAAGGTAACGTTAAGTGGTTTAATGAGTCCAAAGGTTTTGGTTTCATTACTCCGGAAGATGGCAGCAAAGACGTGTTCGTACACTTCTCCGCTATCCAGACCAATGGCTTCAAAACTCTGGCTGAAGGTCAGCGTGTAGAGTTTGAAATCACTAACGGTGCCAAAGGCCCTTCTGCTGCAAACGTAACCGCTCTGTAA
GCF_001461805.1_WP_001062678.1	MAKIKGQVKWFNESKGFGFITPADGSKDVFVHFSAIQGNGFKTLAEGQNVEFEIQDGQKGPAAVNVTAI	ATGGCAAAGATTAAAGGTCAAGTTAAGTGGTTCAACGAGTCCAAAGGTTTTGGGTTCATTACTCCGGCTGATGGCAGCAAAGACGTGTTCGTACACTTCTCTGCAATCCAGGGTAACGGCTTCAAAACTCTGGCTGAAGGCCAGAACGTTGAGTTCGAAATTCAGGACGGCCAGAAAGGCCCGGCAGCTGTTAACGTAACCGCTATCTGA
GCF_001461805.1_WP_013366887.1	MEMGTVKWFNNAKGFGFICPEGGGEDIFAHYSTIQMDGYRTLKAGQPVRFDVHQGPKGNHASVIIPVEAETAA	ATGGAAATGGGTACTGTTAAGTGGTTCAACAATGCCAAAGGGTTCGGCTTCATCTGCCCTGAGGGCGGCGGCGAAGATATTTTCGCTCACTATTCTACCATCCAGATGGATGGTTACAGAACGTTAAAAGCCGGACAGCCCGTTCGGTTTGATGTTCACCAGGGACCAAAAGGCAACCACGCCAGCGTGATTATCCCTGTGGAAGCAGAAACAGCAGCATAG
GCF_001465255.1_WP_054817005.1	MQTGTVKWFNAEKGFGFIEVEGGNDVFVHFSAIQGDGFKTLDEGQRVEFNVVQGNRGPQAENVVKL	ATGCAAACAGGTACAGTAAAATGGTTTAACGCAGAGAAAGGTTTTGGCTTTATCGAAGTTGAAGGGGGAAACGATGTATTCGTACATTTCAGCGCGATTCAAGGCGATGGCTTCAAGACGCTTGACGAAGGCCAACGCGTGGAATTCAACGTTGTACAAGGCAACCGCGGTCCTCAAGCCGAAAATGTTGTAAAGCTGTAA
GCF_001465255.1_WP_062407120.1	MKGTVKWFNAEKGYGFIQVEGGDDVFVHFSAIQGEGFKTLEEGQSVEFEIVEGNRGPQAANVQKL	TTGAAAGGTACAGTAAAATGGTTTAACGCAGAAAAAGGCTACGGATTCATTCAAGTAGAAGGCGGCGACGATGTATTCGTTCACTTCTCCGCAATCCAAGGCGAAGGCTTCAAAACATTGGAAGAAGGCCAATCCGTTGAATTCGAAATCGTTGAAGGAAACCGTGGTCCTCAAGCGGCTAACGTTCAAAAGCTGTAA
GCF_001465255.1_WP_062410128.1	MQGKVKWFNAEKGYGFIEREDGGDVFVHFSAIQADGFKTLEEGQSVEFDIVEGARGPQAANVIKL	ATGCAAGGTAAAGTTAAATGGTTTAATGCAGAAAAAGGCTACGGTTTCATCGAACGCGAAGACGGGGGCGACGTATTCGTGCATTTCTCCGCTATTCAAGCCGATGGCTTCAAGACGCTGGAAGAAGGTCAATCCGTTGAGTTTGATATCGTAGAGGGCGCACGCGGTCCTCAAGCGGCTAACGTCATCAAGTTGTAA
GCF_001465545.3_WP_058375799.1	MATGTVKWFNDAKGFGFITPDEGGEDLFAHFSAIQMNGFKTLKEGQKVVFEVVQGPKGKQASNIQAPS	ATGGCAACCGGTACGGTCAAATGGTTTAACGATGCCAAGGGTTTTGGTTTCATCACGCCGGATGAAGGTGGCGAAGATCTGTTCGCTCACTTCTCGGCGATCCAGATGAACGGCTTCAAGACCCTGAAGGAAGGTCAGAAGGTGGTCTTCGAGGTGGTGCAAGGCCCCAAGGGCAAGCAGGCTTCGAACATTCAGGCACCGTCCTGA
GCF_001465595.2_WP_010807119.1	MATGTVKWFNDAKGFGFITPDEGGEDLFAHFSAIQMNGFKTLKEGQKVQFEVVQGPKGKQASNIQAAA	ATGGCAACCGGTACGGTCAAATGGTTTAACGATGCCAAGGGTTTTGGTTTCATCACGCCGGATGAGGGTGGCGAAGATCTGTTCGCTCACTTCTCGGCGATCCAGATGAACGGTTTCAAGACCCTCAAGGAAGGTCAGAAGGTGCAGTTCGAGGTCGTTCAAGGCCCGAAGGGCAAGCAGGCTTCGAACATCCAGGCGGCTGCCTGA
GCF_001465595.2_WP_010807210.1	MATGTVKWFNDAKGFGFITPDEGGEDLFAHFSEIQSKGFKSLQENQKVSFEVKMGPKGRQASNIQPL	ATGGCAACTGGTACCGTCAAGTGGTTTAACGACGCCAAGGGTTTTGGTTTTATTACGCCGGACGAAGGTGGTGAAGATCTCTTCGCTCACTTCTCGGAAATCCAATCGAAGGGTTTCAAGTCGCTGCAAGAAAACCAGAAGGTCAGCTTCGAAGTGAAGATGGGACCGAAGGGCCGTCAAGCCAGCAACATCCAGCCGCTGTAA
GCF_001465795.2_WP_033541967.1	MQEGTVKWFNSEKGFGFIEVEGGDDVFVHFSAIQGEGFKTLDEGQRVEFEVEEGNRGPQATNVTKL	ATGCAAGAAGGTACAGTAAAATGGTTTAACTCAGAAAAAGGTTTTGGCTTCATCGAAGTTGAAGGCGGCGACGACGTATTCGTACACTTCTCAGCGATCCAAGGCGAAGGCTTTAAAACGCTTGACGAAGGACAGCGCGTAGAATTTGAAGTAGAGGAAGGCAACCGCGGACCTCAAGCTACTAACGTAACTAAACTTTAA
GCF_001465795.2_WP_058383049.1	MEQGTVKWFNAEKGFGFIEREAGDDVFVHFSAIQSDGFKSLDEGQTVTFDIEEGQRGLQATNVTKA	ATGGAACAAGGTACAGTGAAATGGTTTAATGCAGAAAAAGGTTTTGGTTTTATCGAGCGTGAAGCAGGAGATGACGTATTCGTACATTTCTCAGCTATCCAAAGCGACGGTTTCAAATCTTTAGACGAAGGTCAAACCGTAACATTTGATATCGAAGAAGGACAACGTGGCCTACAAGCTACAAACGTTACAAAAGCTTAA
GCF_001465835.2_WP_058385256.1	MQEGTVKWFNSEKGFGFIEVEGGDDVFVHFSAIQGDGFKTLDEGQRVEFEVEEGNRGPQATNVTKA	ATGCAAGAAGGAACAGTAAAATGGTTTAACTCAGAAAAAGGCTTTGGTTTTATCGAAGTTGAAGGCGGAGACGATGTATTCGTACATTTCTCAGCAATTCAAGGTGACGGCTTTAAAACGCTTGACGAAGGGCAACGTGTTGAATTCGAAGTAGAAGAAGGCAACCGTGGACCACAAGCGACAAACGTAACTAAAGCATAA
GCF_001483945.1_WP_006463169.1	MATGTVKWFNDSKGFGFITPDDGGEDLFAHFSAIQMNGFKTLKEGQKVQFDVTQGPKGKQASNIQNAA	ATGGCAACAGGTACTGTCAAGTGGTTCAATGATTCCAAAGGCTTTGGCTTTATCACTCCGGATGACGGCGGCGAAGATCTGTTCGCACACTTCTCCGCAATCCAGATGAACGGCTTCAAGACCCTCAAAGAAGGTCAAAAAGTCCAGTTTGACGTTACGCAAGGCCCCAAGGGCAAGCAAGCATCGAACATCCAGAACGCCGCTTAA
GCF_001483945.1_WP_006464465.1	MATGTVKWFNDAKGFGFITPDEGGEDLFAHFSAIQSNGFKSLKENQRVSFEVTTGPKGKQASNIVPAA	ATGGCAACTGGTACCGTCAAGTGGTTCAACGATGCAAAGGGTTTTGGTTTCATCACCCCCGATGAAGGCGGCGAAGATCTGTTCGCTCACTTCTCGGCTATTCAATCGAATGGTTTCAAGTCCCTGAAGGAAAACCAACGCGTTTCCTTCGAAGTGACCACCGGCCCGAAGGGCAAGCAAGCTTCGAACATCGTTCCGGCTGCTTAA
GCF_001509405.1_WP_055967782.1	MATGTVKWFNADKGFGFIAPDDGSEDVFAHFSAIQTSGYRSLNENQKVEFDVEQGQKGLQAANIRPLD	ATGGCAACCGGAACGGTCAAGTGGTTCAACGCCGACAAGGGCTTCGGCTTCATCGCGCCCGACGACGGCAGCGAGGACGTCTTCGCCCACTTCAGCGCGATCCAGACGAGCGGCTACCGCTCGCTCAACGAGAACCAGAAGGTCGAGTTCGACGTCGAGCAGGGCCAGAAGGGCCTGCAGGCGGCGAACATCCGTCCGCTGGACTGA
GCF_001518795.1_WP_016896897.1	MEQGKVKWFNAEKGFGFIERDGADDVFVHFTAIQGDGFKSLEEGQEVSFEIEDGNRGPQAANVVKA	ATGGAACAAGGTAAAGTTAAATGGTTTAACGCAGAAAAAGGTTTTGGATTTATCGAACGCGACGGCGCTGACGACGTATTCGTTCACTTCACAGCTATTCAAGGTGACGGGTTCAAATCTTTAGAAGAAGGTCAAGAAGTTTCTTTCGAAATCGAAGATGGAAACCGTGGACCACAAGCAGCTAACGTTGTTAAAGCGTAA
GCF_001518835.1_WP_001062678.1	MAKIKGQVKWFNESKGFGFITPADGSKDVFVHFSAIQGNGFKTLAEGQNVEFEIQDGQKGPAAVNVTAI	ATGGCAAAGATTAAAGGTCAAGTTAAGTGGTTCAACGAGTCTAAAGGTTTTGGTTTCATTACTCCTGCTGACGGCAGCAAAGATGTGTTCGTACACTTCTCTGCAATCCAGGGTAACGGCTTCAAAACTCTGGCTGAAGGCCAGAACGTTGAGTTCGAAATTCAGGACGGCCAGAAAGGTCCGGCTGCTGTTAACGTAACCGCTATCTGA
GCF_001518835.1_WP_002439184.1	MSKIKGNVKWFNESKGFGFITPEDGSKDVFVHFSAIQSNGFKTLAEGQRVEFEITNGAKGPSAANVIAL	ATGTCTAAGATTAAAGGTAACGTTAAGTGGTTTAATGAATCCAAAGGATTCGGTTTCATTACTCCGGAAGATGGCAGCAAAGACGTGTTCGTACACTTCTCTGCAATCCAGAGCAATGGTTTCAAAACCCTGGCTGAAGGTCAGCGCGTTGAGTTTGAAATCACTAACGGTGCCAAAGGCCCTTCTGCTGCTAACGTCATCGCTCTGTAA
GCF_001518835.1_WP_032613504.1	MSNKMTGLVKWFNADKGFGFITPDDGSKDVFVHFSAIQSDSFKTLDEGQKISFTIENGAKGPAAGNVTVL	ATGTCTAATAAAATGACTGGTTTAGTAAAATGGTTTAACGCAGATAAAGGTTTTGGCTTTATCACCCCTGATGACGGCAGCAAAGATGTCTTCGTACATTTCTCTGCGATTCAGAGCGACAGCTTCAAAACTCTGGATGAAGGACAGAAAATCTCCTTCACCATTGAAAATGGCGCTAAAGGTCCTGCTGCCGGAAACGTCACAGTTCTGTAA
GCF_001518835.1_WP_032615822.1	MSGKMTGLVKWFNADKGFGFITPDDGSKDVFVHFSAIQNDGYKSLDEGQKVSFTIESGAKGPAAGNVVSL	ATGTCTGGTAAAATGACTGGTCTGGTAAAATGGTTCAACGCTGATAAAGGTTTCGGCTTCATCACTCCTGACGATGGCTCAAAAGACGTGTTCGTACACTTCTCTGCTATCCAGAACGATGGCTACAAATCTCTGGACGAAGGTCAGAAAGTTTCCTTCACCATCGAAAGCGGCGCTAAAGGCCCAGCAGCTGGTAACGTTGTAAGCCTGTAA
GCF_001518835.1_WP_032617324.1	METGTVKWFNNAKGFGFICPEGGGEDIFAHYSTIQMDGYRTLKAGQAVRFDVHLGPKGNHASVIVPIEAEVVA	ATGGAAACGGGTACAGTTAAGTGGTTCAACAACGCCAAAGGGTTTGGTTTCATCTGCCCTGAAGGCGGCGGCGAAGACATCTTCGCGCATTACTCCACCATTCAGATGGATGGTTACAGAACGCTGAAAGCCGGACAAGCCGTTCGGTTCGATGTACACCTCGGGCCAAAAGGCAATCATGCCAGCGTTATTGTGCCCATCGAAGCAGAAGTGGTGGCATAG
GCF_001518835.1_WP_059308183.1	MTSRIKGLVKWFNEDKGFGFISPLDGSKDISVHFSALDGDNFKTLFEGQKVEFAVHSGAKGSAAANVTLCDK	ATGACCTCAAGAATTAAAGGTCTGGTAAAATGGTTTAACGAAGACAAAGGTTTTGGCTTCATCTCTCCTCTTGATGGCAGTAAAGATATTTCTGTCCATTTTTCTGCGCTTGATGGCGACAACTTTAAAACTTTATTTGAAGGACAGAAAGTTGAATTCGCCGTTCACAGCGGTGCCAAAGGTTCTGCTGCTGCAAACGTAACACTTTGCGATAAATAA
GCF_001518835.1_WP_059308184.1	MSHKMTGIVKSFDILSGKGLIIPSDGRKDVLLHISAVNSRESELLIIPGSRIEFCRINGTKGPVAANIYLS	TTGTCCCATAAAATGACAGGAATTGTCAAAAGTTTTGACATTCTCAGCGGTAAAGGCCTCATCATCCCCTCTGATGGCCGAAAAGACGTTCTGCTTCACATTTCAGCCGTTAACTCCCGCGAATCAGAATTACTCATCATCCCAGGAAGCCGCATAGAATTTTGCCGGATCAACGGTACCAAGGGGCCTGTGGCTGCGAACATTTATCTTTCCTGA
GCF_001522635.2_WP_004196460.1	MATGIVKWFNDAKGFGFITPDEGGEDLFAHFSAINMQGFKTLKEGQKVSFEVVQGPKGKQASNIQAA	ATGGCAACTGGTATTGTCAAATGGTTCAATGACGCGAAGGGCTTCGGCTTCATCACGCCCGACGAAGGCGGCGAAGATCTGTTTGCACATTTCTCGGCGATCAACATGCAGGGCTTCAAGACCCTGAAAGAAGGCCAAAAGGTCAGCTTCGAGGTTGTGCAGGGCCCGAAGGGTAAGCAGGCGTCGAACATCCAAGCTGCTTGA
GCF_001522635.2_WP_066488200.1	MATGTVKWFNDAKGFGFITPEGGGEDLFAHFSEIRSDGFKTLQENQKVEFEVKTGPKGLQAANIKPL	ATGGCAACCGGCACCGTCAAGTGGTTCAACGACGCTAAGGGTTTTGGTTTCATCACCCCCGAAGGCGGCGGTGAAGACCTCTTCGCGCATTTCTCGGAAATCCGCAGCGACGGCTTCAAGACGCTGCAAGAGAACCAGAAGGTCGAGTTCGAAGTGAAGACCGGCCCGAAGGGTCTGCAAGCAGCGAACATCAAGCCGCTGTAA
GCF_001524625.2_WP_004196460.1	MATGIVKWFNDAKGFGFITPDEGGEDLFAHFSAINMQGFKTLKEGQKVSFEVVQGPKGKQASNIQAA	ATGGCAACTGGTATTGTCAAATGGTTCAATGACGCGAAGGGCTTCGGCTTCATCACGCCCGACGAAGGCGGCGAAGATCTGTTTGCACATTTCTCGGCGATCAACATGCAGGGCTTCAAGACCCTGAAGGAAGGCCAAAAGGTCAGCTTCGAGGTAGTGCAAGGCCCGAAGGGCAAGCAAGCGTCGAACATCCAAGCAGCTTGA
GCF_001524625.2_WP_038746448.1	MATGTVKWFNDAKGFGFITPEGGGEDLFAHFSEIRTEGFKTLQENQKVEFEVKTGPKGLQAANIKPL	ATGGCAACCGGTACCGTCAAGTGGTTCAACGACGCTAAGGGTTTTGGTTTCATCACGCCGGAAGGCGGTGGCGAGGATCTCTTCGCGCATTTCTCGGAAATCCGCACCGAAGGCTTCAAGACGCTGCAAGAAAACCAGAAGGTCGAATTCGAAGTGAAGACCGGCCCGAAGGGTCTGCAAGCAGCGAACATCAAGCCGCTGTAA
GCF_001534665.1_WP_066283742.1	MSDKMKGQVKWFNESKGFGFITPSDGSKDVFVHFSAIQGNGFKTLAEGQNVEFIIEDGSKGPAAANVTAL	ATGTCTGACAAAATGAAGGGTCAAGTGAAGTGGTTTAATGAATCTAAAGGCTTTGGTTTCATCACTCCTTCTGATGGTAGCAAAGATGTATTCGTTCACTTCTCTGCCATTCAGGGAAATGGATTTAAAACCCTGGCTGAGGGGCAAAATGTAGAATTTATCATTGAAGATGGTTCGAAAGGTCCAGCTGCTGCAAATGTAACTGCTCTTTAA
GCF_001543245.1_WP_067977788.1	MEQGTVKWFNAEKGFGFIEREGQEDVFVHFTAIQGEGFKTLEEGQQVSFEIEAGQRGPQAVNVTKD	ATGGAACAAGGAACAGTTAAATGGTTTAACGCTGAAAAAGGTTTTGGCTTTATCGAGCGTGAAGGTCAAGAAGATGTATTTGTACACTTTACCGCTATCCAAGGAGAAGGTTTCAAAACTCTTGAAGAAGGACAACAAGTTAGCTTTGAAATTGAAGCTGGCCAACGTGGTCCACAAGCAGTTAACGTAACTAAAGACTAA
GCF_001543285.1_WP_003141585.1	MEQGKVKWFNAEKGFGFIERSGADDVFVHFTAIQGDGFKSLEEGQEVSFEIEDGNRGPQAANVVKA	ATGGAACAAGGTAAAGTTAAATGGTTTAACGCAGAAAAAGGTTTTGGATTTATCGAACGCAGCGGCGCTGACGACGTATTCGTTCACTTCACAGCTATTCAAGGTGACGGGTTCAAATCTTTAGAAGAAGGTCAAGAAGTTTCTTTCGAAATCGAAGATGGAAACCGTGGACCACAAGCAGCTAACGTTGTTAAAGCATAA
GCF_001547935.1_WP_068713331.1	MATGTVKWFNNAKGFGFICPEGEDGDIFAHYSTIQMDGYRTLKAGQQVSYEVEQGPKGYHASSVVPIEGELVK	ATGGCTACAGGTACAGTGAAATGGTTCAATAATGCAAAAGGATTTGGGTTTATTTGTCCAGAAGGTGAAGATGGCGACATCTTTGCTCACTATTCAACCATTCAAATGGATGGCTACCGCACACTGAAAGCGGGACAGCAAGTGTCTTATGAAGTGGAACAGGGCCCAAAAGGCTATCACGCGAGCAGCGTCGTTCCCATTGAAGGCGAACTTGTTAAGTAA
GCF_001547935.1_WP_068716955.1	MSNKTTGSVKWFNETKGFGFITPDNGGSDLFVHFRSIESDGFKTLAEGQKVSFVTEQGAKGPQASNVTVL	ATGTCTAATAAAACAACTGGTTCAGTAAAATGGTTTAACGAAACTAAAGGTTTTGGCTTCATCACCCCAGACAACGGTGGTTCTGACCTATTCGTTCACTTCCGTTCAATCGAAAGCGACGGTTTCAAAACTTTAGCTGAAGGCCAAAAAGTATCTTTCGTTACTGAGCAAGGCGCTAAAGGCCCACAAGCAAGTAACGTTACTGTACTGTAA
GCF_001547935.1_WP_068719007.1	MSNKATGSVKWFNETKGFGFISQDNGGQDVFVHFNAIVSEGFKTLAEGQRVSFDVEQGKKGPQAANVTAL	ATGTCTAACAAAGCGACTGGTTCAGTAAAATGGTTCAACGAAACTAAAGGTTTCGGTTTCATCAGCCAAGACAACGGTGGTCAAGATGTGTTTGTACACTTCAACGCTATCGTATCTGAAGGTTTCAAAACTCTTGCTGAAGGTCAACGTGTAAGCTTTGACGTTGAACAGGGTAAAAAAGGCCCTCAAGCAGCAAACGTTACAGCGCTGTAA
GCF_001558255.2_WP_005501719.1	MSNKTTGLVKWFNEEKGFGFITQDNGGADVFVHFRAIASDGFKTLAEGQKVSFDVEQGQKGPQAANVVAL	ATGTCTAATAAAACAACGGGTCTAGTAAAATGGTTTAACGAAGAGAAAGGTTTTGGTTTTATTACCCAAGACAACGGCGGTGCAGACGTATTCGTTCACTTCCGTGCTATCGCTTCTGACGGTTTCAAAACCCTGGCTGAAGGCCAAAAAGTTTCTTTCGACGTTGAACAAGGCCAGAAAGGTCCGCAAGCGGCGAATGTCGTTGCACTTTAA
GCF_001558255.2_WP_005503336.1	MATGTVKWFNNAKGFGFICPDEGEGDIFAHYSTIQMDGYRTLKAGQTVNYEVQEGPKGYHASQIVPVENDALK	ATGGCAACTGGTACAGTTAAATGGTTTAACAACGCTAAAGGGTTTGGATTCATCTGCCCTGATGAAGGAGAAGGCGATATCTTCGCTCATTATTCAACGATCCAAATGGATGGTTACCGCACACTGAAAGCGGGCCAAACCGTGAATTATGAAGTGCAGGAAGGTCCGAAAGGTTACCACGCCAGCCAAATCGTTCCCGTCGAGAACGATGCCTTAAAATAA
GCF_001558415.2_WP_020327470.1	MSNKTTGSVKWFNETKGFGFITPDNGGADVFVHFNAIASEGFRTLTEGQKVTFNVEQGAKGPQAANVQTA	ATGTCTAATAAGACTACAGGTTCAGTAAAATGGTTTAACGAAACTAAAGGTTTCGGTTTCATTACTCCAGACAACGGTGGCGCGGACGTGTTCGTACACTTCAATGCTATCGCTTCAGAAGGTTTCAGAACCTTGACTGAAGGCCAAAAAGTAACGTTCAACGTAGAGCAGGGCGCGAAAGGTCCTCAAGCTGCAAACGTTCAAACTGCATAA
GCF_001558415.2_WP_020330217.1	MATGTVKWFNNAKGFGFICPEGEDGDIFAHYSTIQMDGYRTLKAGQQVSYEVEQGPKGYHASSVVPIEGQLAK	ATGGCTACAGGTACAGTGAAATGGTTCAACAACGCCAAAGGATTTGGGTTTATTTGTCCTGAGGGTGAAGATGGAGACATTTTTGCACACTACTCAACGATTCAAATGGATGGCTACCGCACACTGAAGGCGGGCCAACAGGTATCGTATGAGGTTGAACAAGGACCTAAAGGTTACCACGCGAGCAGCGTCGTACCGATTGAAGGTCAATTAGCAAAATAA
GCF_001558415.2_WP_020330329.1	MSNKSTGSVKWFNETKGFGFITQDNGGKDVFVHFASIVSEGFKTLAEGQRVSFDVEQGKKGPQAANVVAL	ATGTCTAACAAATCGACTGGTTCTGTAAAATGGTTCAACGAAACTAAAGGTTTTGGTTTCATCACTCAAGACAACGGCGGCAAAGATGTATTCGTACACTTCGCTTCAATCGTTTCTGAAGGTTTCAAAACTCTGGCTGAAGGCCAGCGTGTAAGCTTCGACGTTGAGCAGGGCAAAAAAGGCCCACAAGCTGCAAACGTAGTAGCACTATAA
GCF_001558775.1_WP_002433901.1	MKQGTVKWFNAEKGFGFIEVEGENDVFVHFSAINQDGYKSLEEGQSVEFEVVEGDRGPQAANVVKL	ATGAAACAAGGTACAGTAAAATGGTTTAATGCTGAAAAAGGTTTTGGTTTTATCGAAGTTGAAGGAGAAAACGACGTATTCGTACACTTCTCAGCTATTAACCAAGATGGTTACAAATCATTAGAAGAAGGTCAATCAGTAGAATTTGAAGTAGTTGAAGGCGACCGCGGACCTCAAGCTGCAAACGTTGTTAAACTATAA
GCF_001558935.2_WP_000014594.1	MSGKMTGIVKWFNADKGFGFITPDDGSKDVFVHFSAIQNDGYKSLDEGQKVSFTIESGAKGPAAGNVTSL	ATGTCCGGTAAAATGACTGGTATCGTAAAATGGTTCAACGCTGACAAAGGCTTCGGCTTCATCACTCCTGACGATGGCTCTAAAGACGTGTTCGTACACTTCTCTGCTATCCAGAACGATGGCTACAAATCTCTGGACGAAGGTCAGAAAGTTTCCTTCACCATCGAAAGCGGCGCTAAAGGCCCGGCAGCTGGCAACGTAACCAGCCTGTAA
GCF_001558935.2_WP_000034826.1	MSKIKGNVKWFNESKGFGFITPEDGSKDVFVHFSAIQTNGFKTLAEGQRVEFEITNGAKGPSAANVTAL	ATGTCTAAGATTAAAGGTAACGTTAAGTGGTTTAATGAGTCCAAAGGATTCGGTTTCATTACTCCGGAAGATGGCAGCAAAGACGTGTTCGTACACTTCTCTGCAATCCAGACCAATGGTTTTAAAACTCTGGCTGAAGGTCAGCGTGTAGAGTTCGAAATCACTAACGGTGCCAAAGGCCCTTCTGCTGCAAACGTAACTGCTCTGTAA
GCF_001558935.2_WP_001062678.1	MAKIKGQVKWFNESKGFGFITPADGSKDVFVHFSAIQGNGFKTLAEGQNVEFEIQDGQKGPAAVNVTAI	ATGGCAAAGATTAAAGGTCAAGTTAAGTGGTTCAACGAGTCTAAAGGTTTTGGCTTTATTACTCCGGCTGATGGCAGCAAAGACGTGTTCGTACACTTCTCCGCTATCCAGGGTAATGGCTTCAAAACTCTGGCTGAAGGCCAGAACGTTGAGTTCGAAATTCAGGACGGCCAGAAAGGTCCGGCTGCTGTTAACGTAACAGCTATCTGA
GCF_001558935.2_WP_042284847.1	METGTVKWFNNAKGFGFICPEGGGEDIFAHYSTIQMDGYRTLKAGQSVQFDVHQGPKGNHASVIVPIEAEAVA	ATGGAAACGGGTACTGTTAAGTGGTTCAACAATGCCAAAGGGTTTGGGTTCATCTGCCCTGAAGGCGGCGGCGAAGATATTTTCGCTCACTATTCCACCATTCAGATGGATGGTTACAGAACGCTAAAAGCCGGACAGTCTGTCCAGTTTGATGTTCACCAGGGGCCAAAAGGCAATCACGCTAGTGTCATCGTGCCTATCGAAGCAGAAGCTGTTGCATAG
GCF_001562195.1_WP_013784394.1	MAIGKVKWFNNAKGFGFIVPEDGGEDIFAHYSTIQMEGYRSLKAGQEVTYDVQQGPKGLHAENIGFKEEPER	ATGGCGATTGGCAAAGTTAAATGGTTTAACAACGCGAAAGGATTTGGTTTTATTGTACCTGAAGATGGTGGCGAAGATATTTTCGCACACTACTCAACCATCCAAATGGAAGGATATCGCTCACTTAAAGCTGGTCAAGAAGTCACGTATGACGTGCAACAGGGCCCTAAAGGCTTACACGCCGAAAACATAGGCTTTAAAGAAGAACCAGAGCGTTAA
GCF_001562195.1_WP_013786252.1	MSKVTGTVKWFNADKGYGFLTQDNGGKDVFVHFRAIVSDGYKTLPEGQRVEFEVEEGQKGLQAANVHAI	ATGTCTAAAGTTACAGGCACCGTTAAGTGGTTTAACGCTGATAAAGGTTATGGTTTTCTAACTCAAGATAACGGCGGTAAGGACGTATTCGTTCATTTCCGTGCTATCGTTTCTGACGGTTACAAAACTCTTCCAGAAGGTCAGCGCGTGGAATTTGAAGTAGAAGAAGGTCAAAAAGGTCTTCAAGCTGCTAACGTGCACGCCATCTAA
GCF_001584145.1_WP_009665919.1	MATGTVKWFNDSKGFGFITPDDGGEDLFAHFSAIQMNGFKTLKEGQKVQFEVTQGPKGKQASNIQAP	ATGGCAACAGGTACAGTCAAGTGGTTCAACGATTCTAAGGGCTTCGGCTTTATCACTCCGGATGACGGCGGTGAAGATTTGTTTGCACACTTTTCCGCAATCCAGATGAACGGCTTCAAGACCCTTAAAGAAGGTCAAAAAGTCCAGTTCGAAGTCACGCAAGGCCCTAAAGGCAAGCAAGCTTCTAACATCCAAGCTCCTTAA
GCF_001584145.1_WP_014005464.1	MATGTVKWFNDSKGFGFITPDDGGEDLFAHFSAINMEGFKTLKEGQKVTFDVTQGPKGKQASNIQNP	ATGGCAACAGGTACTGTTAAGTGGTTCAACGACTCCAAAGGTTTCGGTTTCATTACGCCGGACGATGGTGGCGAAGACTTGTTCGCGCATTTCTCCGCGATCAACATGGAAGGTTTCAAGACGCTCAAAGAAGGCCAGAAAGTGACATTCGATGTTACCCAAGGCCCGAAAGGCAAGCAGGCATCCAACATTCAAAATCCCTGA
GCF_001584205.1_WP_009665919.1	MATGTVKWFNDSKGFGFITPDDGGEDLFAHFSAIQMNGFKTLKEGQKVQFEVTQGPKGKQASNIQAP	ATGGCAACAGGTACAGTCAAGTGGTTCAACGATTCTAAGGGCTTCGGCTTTATCACTCCGGATGACGGCGGTGAAGATTTGTTTGCTCACTTTTCGGCAATCCAGATGAACGGCTTCAAGACTCTCAAAGAAGGTCAAAAAGTCCAGTTCGAAGTCACGCAAGGCCCTAAAGGCAAGCAAGCTTCTAACATCCAAGCTCCTTAA
GCF_001584225.1_WP_009665919.1	MATGTVKWFNDSKGFGFITPDDGGEDLFAHFSAIQMNGFKTLKEGQKVQFEVTQGPKGKQASNIQAP	ATGGCAACAGGTACAGTCAAGTGGTTCAACGATTCTAAGGGCTTCGGCTTTATCACTCCGGATGACGGCGGTGAAGATTTGTTTGCACACTTTTCCGCAATCCAGATGAACGGCTTCAAGACCCTCAAAGAAGGTCAAAAAGTCCAGTTCGAAGTCACGCAAGGCCCTAAAGGCAAGCAAGCTTCTAACATCCAGGCTCCGTAA
GCF_001584225.1_WP_061939490.1	MATGTVKWFNDSKGFGFITPDAGGEDLFAHFSAIQMDGFKTLKEGQKVKFDITEGPKGKQASNIQNP	ATGGCAACAGGTACTGTTAAGTGGTTCAACGACTCCAAGGGTTTCGGCTTCATTACACCGGACGCTGGTGGTGAAGATTTGTTCGCGCACTTTTCCGCTATTCAAATGGACGGTTTCAAGACGCTCAAAGAAGGCCAAAAAGTAAAATTCGATATCACCGAAGGCCCTAAAGGCAAGCAAGCTTCCAACATCCAGAATCCTTGA
GCF_001586155.1_WP_043318293.1	MLSGKVKWFNNAKGYGFILADGRDEDLFAHYSAIQMDGYKTLKAGQPVSFEILQGPKGLHAVNIQPIGAGAPASAAQASPSSEVQSVTAEA	ATGCTCAGCGGTAAGGTCAAGTGGTTCAACAACGCCAAGGGCTATGGATTCATCCTGGCCGACGGCCGAGATGAGGACCTGTTCGCTCATTACTCGGCAATCCAGATGGATGGCTACAAGACGCTCAAGGCCGGCCAGCCGGTCAGCTTCGAGATCCTGCAAGGTCCGAAGGGTCTGCATGCGGTGAACATCCAGCCGATCGGCGCCGGCGCGCCGGCCAGCGCCGCCCAGGCCAGCCCCAGCAGCGAGGTGCAGAGCGTCACCGCAGAAGCCTGA
GCF_001597285.1_WP_021700241.1	MLSGKVKWFNNAKGYGFIVADGRDEDLFAHYSAIQMDGYKTLKAGQAVKFDILQGPKGLHAVNISAILATSDTPAHASAPQSTPVEA	ATGCTTAGCGGTAAGGTCAAGTGGTTCAACAACGCCAAGGGCTACGGCTTCATCGTGGCAGATGGCCGAGATGAGGACCTGTTCGCCCACTACTCGGCTATCCAGATGGACGGCTACAAGACTCTCAAGGCCGGCCAAGCGGTCAAGTTCGATATTCTGCAGGGCCCCAAAGGCCTGCATGCCGTGAATATCAGCGCGATTCTGGCAACCAGTGACACCCCGGCGCACGCCAGCGCGCCGCAAAGCACTCCAGTAGAAGCCTGA
GCF_001611155.1_WP_046871276.1	MEHGTVKWFNADKGFGFITRENGSDVFVHFSAIQGDGFKTLEEGQAVTFDVEESDRGPQAVNVNKD	ATGGAACATGGTACAGTTAAATGGTTTAACGCAGACAAAGGTTTTGGTTTTATTACTCGCGAAAACGGTAGCGATGTATTCGTACATTTCTCAGCTATCCAAGGCGACGGCTTTAAAACTCTTGAAGAAGGCCAAGCAGTTACTTTCGATGTAGAAGAAAGCGACCGTGGACCACAAGCAGTTAACGTAAACAAAGACTAA
GCF_001611955.1_WP_002433901.1	MKQGTVKWFNAEKGFGFIEVEGENDVFVHFSAINQDGYKSLEEGQSVEFEVVEGDRGPQAANVVKL	ATGAAACAAGGTACAGTTAAATGGTTTAACGCTGAAAAAGGTTTTGGTTTTATCGAAGTTGAAGGTGAAAACGACGTATTCGTACACTTTTCAGCAATTAACCAAGATGGTTACAAATCATTAGAAGAAGGTCAATCAGTTGAATTTGAAGTAGTTGAAGGCGACCGCGGTCCTCAAGCTGCAAACGTTGTAAAACTATAA
GCF_001629705.1_WP_066237152.1	MQTGKVKWFNAEKGFGFIEVEGGDDVFVHFSAIQSEGFKSLDEGQEVEFEIVDGARGPQAANVTKK	ATGCAAACAGGTAAAGTAAAATGGTTTAACGCTGAAAAAGGTTTCGGATTCATCGAAGTTGAAGGTGGAGACGACGTATTCGTACACTTCTCTGCAATCCAATCAGAAGGATTCAAATCACTTGACGAAGGTCAAGAAGTAGAATTTGAAATTGTTGACGGAGCTCGCGGACCACAAGCAGCTAACGTAACTAAAAAATAA
GCF_001629705.1_WP_066245425.1	MLGKVKWFNAEKGFGFIEREDGDDVFVHFSAINTDGFKSLDEGQQVEFDIVDGARGPQAANVTKL	ATGTTAGGAAAAGTAAAATGGTTTAACGCAGAAAAAGGTTTTGGATTTATTGAGCGCGAAGACGGGGACGATGTGTTCGTACACTTCTCTGCAATCAACACTGACGGATTCAAAAGCCTTGACGAAGGTCAGCAAGTCGAGTTTGATATTGTAGATGGAGCTCGTGGGCCTCAAGCGGCTAACGTAACTAAACTATAA
GCF_001629705.1_WP_066245685.1	MQNGKVKWFNAEKGFGFIEVEGGNDVFVHFSAIQSEGFKSLEEGQEVSFEIVDGERGPQAANVTKL	ATGCAAAATGGTAAAGTAAAATGGTTCAACGCTGAGAAAGGTTTCGGCTTCATCGAAGTTGAAGGCGGAAACGACGTATTCGTTCACTTTTCTGCGATTCAATCAGAAGGCTTCAAGTCTCTTGAAGAAGGACAAGAAGTATCTTTCGAAATCGTTGATGGCGAGCGTGGACCGCAAGCTGCTAACGTAACAAAACTTTAA
GCF_001634285.1_WP_027408825.1	MQNGKVKWFNNEKGYGFIEVEGGADVFVHFTAIQGEGYKTLEEGQEVSFEIVQGNRGPQAANVVKL	ATGCAAAACGGTAAAGTAAAATGGTTTAACAATGAAAAAGGCTATGGGTTCATCGAAGTAGAAGGCGGAGCGGACGTATTCGTTCACTTCACAGCAATTCAAGGTGAAGGTTATAAAACGTTAGAAGAAGGTCAAGAAGTTTCTTTTGAAATTGTTCAAGGAAACCGCGGACCACAAGCGGCGAACGTCGTAAAATTATAA
GCF_001634285.1_WP_066324730.1	MNTGTVKWFNAEKGFGFIATEGGNDVFVHFTAIQGDGFKTLEEGQKVTFDIINGNRGPQAANVRKG	ATGAACACAGGTACAGTAAAATGGTTTAATGCAGAAAAAGGATTTGGCTTTATTGCAACAGAAGGCGGAAACGACGTATTCGTTCACTTCACTGCAATCCAAGGCGACGGATTTAAAACGCTTGAAGAAGGACAAAAAGTGACATTTGACATTATCAACGGAAACCGTGGTCCACAAGCGGCAAACGTTCGAAAAGGATAA
GCF_001636295.1_WP_068203301.1	MATGTVKWFNSEKGYGFIAPEDGTADVFVHFSAIQSQGYRSLEEEQKVEFDVTQGPKGPQAENVRPL	ATGGCCACCGGAACCGTGAAGTGGTTCAACAGCGAGAAGGGCTACGGCTTCATCGCCCCCGAGGACGGCACCGCTGACGTGTTCGTCCACTTCTCCGCCATCCAGTCCCAGGGCTACCGCAGCCTGGAGGAGGAGCAGAAGGTCGAGTTCGACGTCACCCAGGGCCCGAAGGGCCCGCAGGCGGAGAACGTTCGCCCCCTCTGA
GCF_001642805.2_WP_002221949.1	MAKIKGQVKWFNESKGFGFITPADGSKDVFVHFSAIQGNGFKTLAEGQNVEFEIQDGQKGPSAVNVTAI	ATGGCAAAGATCAAAGGTCAAGTTAAGTGGTTCAACGAGTCTAAAGGTTTCGGTTTCATCACCCCGGCTGACGGCAGCAAAGACGTGTTCGTACACTTCTCTGCAATCCAGGGTAACGGCTTCAAAACCCTGGCTGAAGGCCAGAACGTTGAGTTCGAAATCCAAGATGGCCAGAAAGGTCCATCTGCAGTAAACGTTACTGCTATCTAA
GCF_001642805.2_WP_004927572.1	MSKITGHVKWFNESKGFGFITPADGSKDVFVHFSAIVSDGFKTLAEGQQVEFSIQDSQRGPAAANVVAI	ATGAGCAAGATCACTGGTCACGTTAAATGGTTCAACGAAAGCAAAGGTTTCGGCTTCATTACCCCTGCCGATGGCTCTAAAGACGTTTTCGTGCATTTTTCCGCTATCGTTAGCGATGGTTTCAAGACCCTGGCTGAAGGCCAGCAGGTTGAGTTCTCCATCCAGGACAGCCAACGTGGCCCGGCTGCAGCCAACGTCGTTGCTATTTAA
GCF_001642805.2_WP_004928349.1	METGTVKWFNNAKGFGFICPAGGGEDIFAHYSTIKMDGYRTLKAGQQVSFDVHQGPKGNHASLIVPVESEALS	ATGGAGACGGGTACTGTTAAATGGTTTAACAACGCCAAAGGTTTTGGTTTCATCTGCCCAGCCGGCGGTGGCGAAGATATTTTCGCGCATTATTCCACAATCAAGATGGATGGTTACAGAACGTTGAAGGCGGGCCAGCAGGTCAGCTTCGACGTGCATCAAGGGCCCAAAGGCAACCATGCCAGTCTTATTGTGCCGGTGGAAAGCGAGGCGCTGTCCTAA
GCF_001642805.2_WP_004935122.1	MSNMIKGQVKWFNEAKGFGFITPADGSKDVFVHFSAIQDQGFKTLAEGQNVQFSIENGAKGPSAANVTAI	ATGTCCAACATGATCAAAGGTCAAGTGAAGTGGTTCAACGAAGCTAAAGGTTTTGGTTTCATCACCCCAGCAGACGGCAGCAAAGACGTATTCGTACACTTCTCTGCTATCCAGGATCAAGGCTTCAAGACCCTGGCTGAAGGCCAGAACGTACAGTTCTCTATCGAGAACGGTGCGAAAGGTCCATCTGCGGCTAACGTTACCGCTATCTAA
GCF_001642805.2_WP_004940030.1	MSKIKGSVKWFNESKGFGFITPEDGSKDVFVHFSAIVSNGFKTLAEGQRVEFEITNGAKGPSAANVTAI	ATGTCTAAGATTAAAGGTAGCGTTAAGTGGTTTAATGAATCCAAAGGCTTCGGTTTCATTACTCCGGAAGATGGTAGCAAGGACGTTTTCGTTCACTTCTCTGCCATCGTTAGCAACGGTTTCAAAACGCTTGCTGAAGGCCAGCGTGTAGAATTTGAAATCACGAACGGTGCCAAAGGCCCATCTGCCGCTAACGTTACTGCTATCTAA
GCF_001642805.2_WP_019454537.1	MSKKTGQVKWFNESKGFGFIEQNDGGKDVFVHFSAIMTDGFKTLAEGQRVEYTIQDSPRGPAAANVVAL	ATGTCTAAGAAGACTGGTCAGGTTAAGTGGTTCAACGAAAGCAAAGGTTTTGGTTTCATTGAGCAGAACGACGGCGGCAAAGATGTATTCGTACACTTCTCCGCAATCATGACCGACGGTTTCAAGACCCTGGCTGAAGGCCAGCGTGTCGAGTACACCATCCAGGACAGCCCGCGCGGGCCGGCTGCCGCCAACGTTGTTGCTCTGTAA
GCF_001644605.1_WP_068606471.1	MQGKVKWFNAEKGYGFIETEDGGDVFVHFSAIQTDGFKTLDEGQEVEFDIVEGARGPQAANVIKL	ATGCAAGGAAAAGTGAAATGGTTTAACGCTGAGAAGGGCTACGGCTTTATCGAAACAGAAGATGGCGGCGACGTATTCGTACATTTCTCCGCAATCCAGACAGACGGATTCAAGACTCTTGACGAAGGTCAAGAAGTAGAGTTCGACATCGTTGAAGGCGCACGCGGACCACAAGCAGCTAACGTAATCAAGTTGTAA
GCF_001644605.1_WP_068606857.1	MEQGTVKWFNAEKGFGFIEVEGGNDVFVHFSAIVGDGFKSLDEGQRVEFNVVQGNRGPQAENVVKL	ATGGAACAAGGAACAGTAAAATGGTTTAACGCAGAAAAAGGATTTGGCTTTATCGAAGTTGAAGGCGGCAACGATGTATTCGTACATTTCTCCGCAATCGTAGGCGACGGTTTCAAATCTTTGGACGAAGGCCAACGCGTTGAGTTCAACGTAGTACAAGGCAACCGCGGTCCTCAAGCTGAGAACGTAGTAAAACTTTAA
GCF_001644605.1_WP_068608624.1	METGTVKWFNAEKGFGFIEVEGGSDVFVHFSAIQGEGFKSLDEGQRVQFNITQGNRGPQAENVVKL	ATGGAAACAGGTACAGTGAAATGGTTTAACGCAGAGAAAGGCTTCGGCTTTATCGAAGTAGAAGGCGGAAGTGACGTATTCGTTCATTTCAGCGCGATTCAAGGCGAAGGCTTTAAATCTTTGGATGAAGGTCAACGCGTACAATTCAACATTACTCAAGGTAACCGCGGACCGCAAGCTGAGAATGTTGTAAAACTATAA
GCF_001644605.1_WP_068609986.1	MKGTVKWFNAEKGYGFISVEGGEDVFVHFSAIQGDGFKTLDEGQEVEFEITDGNRGPQAANVTKL	TTGAAGGGTACAGTTAAATGGTTTAACGCAGAAAAAGGCTACGGTTTTATCTCTGTTGAAGGTGGCGAAGATGTATTTGTGCATTTCTCCGCAATTCAAGGCGACGGATTCAAGACTCTTGATGAAGGTCAAGAAGTAGAATTCGAAATCACGGACGGAAACCGCGGTCCTCAAGCAGCTAACGTAACTAAATTATAA
GCF_001658025.2_WP_001062678.1	MAKIKGQVKWFNESKGFGFITPADGSKDVFVHFSAIQGNGFKTLAEGQNVEFEIQDGQKGPAAVNVTAI	ATGGCAAAGATTAAAGGTCAAGTTAAGTGGTTCAACGAGTCTAAAGGTTTTGGTTTCATTACTCCGGCAGACGGCAGCAAAGATGTATTCGTACATTTCTCTGCAATCCAGGGTAACGGCTTCAAAACTCTGGCTGAAGGCCAGAACGTTGAGTTTGAAATTCAGGACGGTCAGAAAGGCCCGGCTGCAGTTAACGTAACTGCTATCTGA
GCF_001658025.2_WP_007373839.1	MSKIKGNVKWFNESKGFGFITPEDGSKDVFVHFSAIQSNGFKTLAEGQRVEFEITNGAKGPSAANVMPV	ATGTCTAAGATTAAAGGTAACGTTAAGTGGTTTAATGAATCCAAAGGATTCGGTTTCATTACTCCGGAAGATGGCAGCAAAGACGTGTTCGTACACTTCTCTGCAATCCAGAGCAATGGTTTCAAAACCCTGGCTGAAGGTCAGCGCGTTGAGTTTGAAATCACTAACGGTGCCAAAGGCCCTTCTGCTGCAAACGTAATGCCTGTTTAA
GCF_001658025.2_WP_007374119.1	METGTVKWFNNAKGFGFICPEGGGEDIFAHYSTIQMDGYRTLKAGQTVRFDVHQGPKGNHASVIVPVEVEAMA	ATGGAAACGGGTACTGTTAAGTGGTTCAACAATGCCAAAGGGTTTGGTTTTATTTGCCCTGAAGGCGGCGGCGAAGATATCTTCGCGCATTACTCCACCATTCAAATGGATGGTTACAGAACGTTAAAAGCCGGGCAGACAGTCCGGTTTGATGTACACCAGGGCCCTAAAGGCAATCACGCCAGCGTTATCGTGCCCGTCGAAGTGGAAGCCATGGCCTGA
GCF_001658025.2_WP_007374827.1	MTSRIKGLVKWFNEDKGFGFISPLDGSKDIFVHFSALNGDNFKTLFEGQKVEFAIHSGDKGPAAANVILCDK	ATGACCTCAAGAATTAAAGGCCTTGTAAAATGGTTTAACGAAGACAAAGGTTTTGGTTTCATCTCTCCTCTTGATGGAAGCAAAGATATCTTTGTTCATTTTTCAGCGCTTAACGGAGACAACTTTAAAACCTTATTTGAAGGGCAGAAAGTTGAATTCGCAATACACAGTGGAGACAAAGGTCCTGCTGCGGCAAACGTAATACTTTGCGATAAATAA
GCF_001658025.2_WP_035887590.1	MSTKMNGIVKWFNAEKGFGFITPKDGSKDVFVHFSAIQSNAYRTLEENQEVEFTIENGPKGPAAANVVPR	ATGTCTACTAAAATGAACGGTATCGTTAAATGGTTCAACGCTGAGAAAGGCTTCGGTTTCATTACTCCGAAAGATGGCAGCAAAGATGTATTCGTACATTTCTCTGCTATCCAGAGCAATGCGTACCGTACTCTTGAAGAAAATCAAGAGGTTGAGTTTACTATCGAAAACGGTCCGAAAGGCCCGGCTGCGGCCAACGTGGTTCCGCGCTAA
GCF_001658025.2_WP_043953526.1	MSNKMTGLVKWFNESKGFGFITPDNGSKDVFVHFSAIQSGGFKTLNEGQKVEFTIEDGQKGPSAGNVFAI	ATGTCTAACAAAATGACTGGTTTAGTAAAATGGTTTAATGAGTCCAAAGGGTTTGGTTTCATCACGCCTGACAATGGCAGCAAAGATGTATTCGTGCATTTTTCTGCTATCCAGAGCGGCGGTTTTAAGACGCTGAATGAAGGTCAGAAAGTCGAATTCACCATTGAAGATGGGCAAAAAGGCCCGTCCGCAGGGAATGTTTTCGCAATATAA
GCF_001658025.2_WP_071892700.1	MSHKMTGIVKSFDILSGKGFITPSDGRKDVLLHISAVNSRESELPIPGSRIEFCRIHGLRGPVAANIYLS	TTGTCCCATAAAATGACAGGAATTGTCAAAAGTTTTGACATTCTCAGCGGTAAAGGTTTCATCACCCCTTCAGATGGCAGAAAAGACGTTCTGCTTCATATTTCAGCCGTTAATTCACGCGAATCGGAATTACCCATTCCCGGAAGCCGTATTGAATTTTGTCGGATTCACGGTCTCAGGGGGCCTGTGGCGGCGAACATCTATCTTTCCTGA
GCF_001661075.1_WP_082930382.1	MSGVKVSGKVKWFNNAKGYGFINEDGKTEDLFAHYSAIQMDGYKTLKAGQAVVFEIIQGPKGLHAVNITHPLAVDAVITPATQQTVTV	ATGTCAGGAGTGAAGGTCAGCGGCAAGGTCAAATGGTTCAATAACGCCAAGGGTTACGGCTTCATCAACGAGGACGGCAAGACAGAAGATCTCTTTGCCCACTACTCGGCCATCCAGATGGACGGTTACAAAACCCTGAAAGCCGGCCAGGCCGTGGTCTTTGAGATCATCCAGGGCCCCAAGGGCTTGCACGCCGTGAATATCACCCACCCACTGGCCGTCGACGCGGTCATCACGCCAGCCACGCAACAGACGGTTACGGTTTAA
GCF_001663675.1_WP_068224886.1	MEHGTVKWFNPEKGFGFISREDGSDVFVHFSAIQDEGFKTLDEGQAVTFDVEESDRGPQAVNVVKA	ATGGAACACGGTACAGTTAAATGGTTCAATCCCGAGAAGGGCTTTGGTTTTATTTCACGAGAAGACGGCAGCGATGTATTCGTTCATTTCTCCGCAATTCAAGATGAAGGTTTTAAGACACTTGATGAAGGTCAGGCAGTAACTTTTGATGTTGAAGAAAGCGATCGCGGCCCACAAGCAGTTAATGTTGTTAAAGCTTAA
GCF_001663675.1_WP_068225699.1	MEHGTVKWFNADKGYGFITADSGTDVFVHFSAIQGDGYKSLDEGQSVNFDIEQSDRGPQASNVTKN	ATGGAACATGGTACAGTAAAATGGTTTAACGCAGACAAAGGTTACGGTTTTATCACAGCTGATAGTGGTACAGATGTATTCGTACATTTCTCAGCTATCCAAGGCGACGGCTACAAGTCATTAGACGAAGGCCAGAGCGTTAACTTTGATATCGAACAAAGCGACCGTGGACCACAAGCTTCAAACGTTACTAAAAACTAA
GCF_001663675.1_WP_068280304.1	MEHGTVKWFNADKGYGFITRDNGSDVFVHFSAIQGDGYKTLDEGQSVTFDVEDSDRGPQATNVVKD	ATGGAACACGGAACAGTTAAATGGTTTAATGCAGACAAAGGTTATGGCTTCATTACTCGCGACAACGGTAGCGATGTATTCGTACATTTCTCAGCTATCCAAGGCGACGGCTACAAGACTTTAGACGAAGGCCAAAGCGTAACATTTGATGTTGAAGACAGCGATCGTGGCCCACAAGCTACTAACGTTGTTAAAGACTAA
GCF_001663855.1_WP_021192552.1	MATGTVKWFNDAKGFGFITPDDGGEDLFAHFSAINAAGFKSLKEGQKVSFDVTQGPKGKQASNIVPQ	ATGGCTACTGGTACTGTTAAGTGGTTCAACGACGCAAAGGGCTTCGGCTTCATTACCCCGGATGACGGCGGTGAGGACCTTTTCGCGCATTTCTCTGCGATCAATGCGGCGGGCTTCAAAAGCCTGAAGGAAGGTCAAAAGGTATCGTTTGACGTCACGCAAGGCCCGAAGGGTAAGCAGGCGTCGAATATCGTGCCGCAGTAA
GCF_001682385.1_WP_011764868.1	MATGTVKWFNDSKGFGFITPDDGSEDLFAHFSAINMNGFKTLKEGEKVSFEVTQGPKGKQASNIQRA	ATGGCAACTGGCACTGTTAAGTGGTTCAACGACTCCAAGGGTTTTGGTTTCATTACCCCTGACGATGGCAGCGAAGACCTGTTCGCGCACTTCTCGGCCATCAACATGAACGGCTTCAAGACCCTGAAGGAAGGCGAAAAGGTTTCCTTCGAGGTCACTCAGGGGCCGAAGGGTAAGCAGGCTTCGAACATCCAGCGAGCCTGA
GCF_001682385.1_WP_011766330.1	MATGTVKWFNDAKGFGFITPENGGEDLFAHFSAIQGSGFKSLAEGQRVEFEITRGPKGQQASNIRPL	ATGGCAACAGGTACCGTGAAGTGGTTCAACGACGCGAAGGGCTTTGGTTTCATCACGCCGGAAAACGGTGGTGAGGATCTCTTCGCCCACTTCTCCGCGATCCAGGGTTCCGGCTTCAAGTCGCTGGCTGAAGGCCAGCGCGTCGAGTTCGAAATCACGCGTGGCCCGAAGGGCCAGCAGGCGTCCAACATTCGCCCGCTGTAA
GCF_001683395.1_WP_001062678.1	MAKIKGQVKWFNESKGFGFITPADGSKDVFVHFSAIQGNGFKTLAEGQNVEFEIQDGQKGPAAVNVTAI	ATGGCAAAGATTAAAGGTCAAGTTAAGTGGTTCAACGAGTCTAAAGGTTTTGGTTTCATTACTCCGGCTGATGGCAGCAAAGATGTATTCGTACACTTCTCTGCAATCCAGGGTAACGGCTTCAAAACTCTGGCCGAAGGCCAGAACGTTGAGTTTGAAATTCAGGACGGCCAGAAAGGCCCGGCTGCAGTTAACGTAACTGCTATCTGA
GCF_001683395.1_WP_007373839.1	MSKIKGNVKWFNESKGFGFITPEDGSKDVFVHFSAIQSNGFKTLAEGQRVEFEITNGAKGPSAANVMPV	ATGTCTAAGATTAAAGGTAACGTTAAGTGGTTTAATGAATCCAAAGGATTCGGTTTCATTACTCCGGAAGATGGCAGCAAAGACGTGTTCGTACACTTCTCTGCAATCCAGAGCAATGGTTTCAAAACCCTGGCTGAAGGTCAGCGCGTTGAGTTTGAAATCACTAACGGTGCCAAAGGCCCATCTGCTGCGAACGTAATGCCTGTTTAA
GCF_001683395.1_WP_007374119.1	METGTVKWFNNAKGFGFICPEGGGEDIFAHYSTIQMDGYRTLKAGQTVRFDVHQGPKGNHASVIVPVEVEAMA	ATGGAAACGGGTACTGTTAAGTGGTTCAACAATGCCAAAGGGTTTGGTTTTATCTGCCCTGAAGGCGGCGGCGAAGATATCTTCGCGCATTACTCCACCATTCAAATGGATGGTTACAGAACGTTAAAAGCCGGGCAGACTGTCCGGTTTGATGTACACCAGGGCCCTAAAGGCAATCACGCCAGCGTCATCGTGCCCGTAGAAGTGGAAGCCATGGCCTGA
GCF_001683395.1_WP_007374827.1	MTSRIKGLVKWFNEDKGFGFISPLDGSKDIFVHFSALNGDNFKTLFEGQKVEFAIHSGDKGPAAANVILCDK	ATGACCTCAAGAATTAAAGGCCTGGTAAAATGGTTTAACGAAGACAAAGGTTTTGGCTTCATCTCTCCTCTCGATGGAAGCAAAGATATCTTTGTTCATTTTTCTGCGCTCAATGGCGATAATTTCAAAACGTTATTTGAAGGGCAGAAAGTCGAATTTGCAATACACAGTGGCGATAAAGGCCCTGCTGCTGCAAATGTAATACTTTGCGATAAATAA
GCF_001683395.1_WP_016495754.1	MSNKMTGLVKWFNSDKGFGFITPDDGSKDVFVHFSAIQSDSYKTLDEGQKVSFTIESGAKGPAAGNVTAL	ATGTCTAATAAAATGACTGGTTTAGTAAAATGGTTCAATTCTGACAAAGGTTTTGGCTTTATCACTCCGGACGACGGCAGCAAAGATGTGTTTGTTCACTTCTCTGCAATCCAGAGCGACAGCTACAAAACCCTGGATGAAGGTCAGAAAGTCTCCTTCACCATCGAAAGCGGCGCGAAAGGCCCGGCAGCTGGTAACGTTACTGCGCTGTAA
GCF_001683395.1_WP_017457639.1	MSTKMNGIVKWFNAEKGFGFITPKDGSKDVFVHFSAIQSNAFRTLEENQEVEFTIENGPKGPAAANVVPR	ATGTCTACTAAAATGAACGGTATCGTTAAATGGTTCAACGCTGAGAAAGGCTTCGGTTTCATTACTCCGAAAGACGGCAGCAAAGATGTATTCGTACATTTTTCCGCTATCCAGAGCAATGCATTCCGTACTCTTGAAGAAAATCAAGAGGTTGAGTTTACTATTGAGAACGGCCCGAAAGGTCCGGCTGCGGCCAACGTGGTTCCGCGCTAA
GCF_001683395.1_WP_071908222.1	MSRKMTGIVKSFDRRSGRGLITPSDGRKDVLLHTSAVNSSESELLIPGIRIEFCRINGLSGPVAANVYLS	TTGTCCCGTAAAATGACAGGAATAGTCAAAAGTTTCGACAGACGCAGTGGCAGAGGGCTCATCACCCCTTCTGATGGTCGAAAAGACGTTCTGCTCCACACTTCAGCCGTTAACTCCAGCGAATCAGAATTACTCATTCCAGGGATCCGCATCGAATTTTGTCGCATCAACGGTCTCAGTGGCCCTGTGGCTGCAAATGTCTATCTTTCCTGA
GCF_001685395.1_WP_068694440.1	MKGTVKWFNAEKGYGFIQVEGGEDVFVHFSAIQGDGFKTLDEGQEVEFEITEGNRGPQAANVIKL	TTGAAAGGTACAGTTAAATGGTTCAACGCAGAAAAAGGCTACGGATTCATTCAAGTTGAAGGTGGCGAAGACGTATTCGTACACTTCTCCGCAATCCAAGGCGACGGTTTCAAAACTTTGGACGAAGGTCAAGAAGTTGAATTCGAAATCACTGAAGGCAACCGTGGCCCTCAAGCCGCTAACGTAATCAAATTATAA
GCF_001685395.1_WP_068698711.1	MEKGTVKWFNADKGFGFIEVEGGDDVFVHFSAIVGDGFKSLDEGQRVEFNVVQGNRGPQAENVVKL	ATGGAAAAAGGAACAGTAAAATGGTTTAACGCAGACAAAGGTTTTGGTTTTATCGAGGTAGAAGGCGGAGACGACGTATTCGTTCACTTCAGCGCTATCGTTGGCGACGGCTTCAAATCGCTGGACGAAGGTCAACGCGTTGAATTTAATGTAGTACAAGGCAACCGCGGCCCGCAAGCCGAGAACGTTGTTAAACTGTAA
GCF_001685395.1_WP_068699733.1	METGTVKWFNAEKGFGFIEVEGGSDVFVHFSAITGEGFKTLDEGQRVQFDIVQGNRGPQADNVVKL	ATGGAAACTGGAACAGTTAAATGGTTTAACGCTGAGAAAGGCTTTGGTTTCATCGAAGTTGAAGGCGGAAGCGACGTATTCGTACACTTCAGCGCAATCACAGGCGAAGGCTTTAAAACGCTTGACGAAGGTCAACGCGTTCAATTCGATATCGTTCAAGGCAACCGCGGTCCACAAGCCGACAACGTTGTTAAACTGTAA
GCF_001685435.2_WP_008587582.1	MQNGTVKWFNAEKGYGFIQVEEGNDVFVHFSAIQEEGFKSLEEGQEVTFEIVEGDRGPQAANVVKQ	ATGCAAAACGGTACAGTAAAATGGTTTAACGCAGAAAAAGGTTATGGCTTCATTCAGGTAGAGGAAGGTAACGACGTATTCGTACACTTCTCCGCTATCCAAGAAGAAGGTTTCAAGTCTCTTGAAGAAGGTCAAGAAGTTACTTTCGAAATCGTAGAAGGCGACCGTGGCCCACAAGCGGCTAACGTTGTTAAACAATAA
GCF_001685435.2_WP_008588184.1	MLQGNVKWFNAEKGYGFIEVEGQDDVFVHFSAIQDEGFKTLEEGQTVSFEIVEGNRGPQAANVQK	ATGTTACAAGGTAACGTGAAATGGTTCAACGCAGAAAAAGGTTATGGCTTCATCGAAGTAGAAGGTCAGGACGATGTATTCGTACACTTCTCCGCTATTCAAGACGAAGGCTTCAAAACACTTGAAGAAGGTCAAACAGTATCTTTCGAAATCGTCGAAGGTAACCGTGGACCACAAGCTGCTAACGTTCAAAAATAA
GCF_001687565.2_WP_006831480.1	MQEGTVKWFNSEKGFGFIEVEGGDDVFVHFSAIQGDGFKTLDEGQRVEFQVEEGNRGPQATNVTKA	ATGCAAGAAGGAACAGTGAAATGGTTTAACTCAGAAAAAGGCTTTGGTTTTATCGAAGTCGAAGGTGGAGACGATGTATTCGTACATTTCTCAGCAATCCAAGGTGACGGCTTTAAAACGCTTGACGAAGGACAACGTGTTGAATTTCAAGTAGAAGAAGGCAACCGCGGACCACAAGCTACTAATGTAACTAAAGCCTAA
GCF_001687585.2_WP_008428384.1	MQEGTVKWFNSEKGFGFIEVEGGDDVFVHFSAIQGEGFKTLDEGQRVEFEVEEGNRGPQATNVTKV	ATGCAAGAAGGAACAGTGAAATGGTTTAACTCAGAAAAAGGCTTTGGTTTTATCGAAGTTGAAGGCGGAGACGATGTATTCGTACACTTCTCAGCAATCCAAGGCGAAGGCTTTAAAACACTTGACGAAGGTCAACGCGTTGAATTTGAAGTAGAAGAAGGCAACCGCGGACCTCAAGCTACAAACGTAACTAAAGTCTAA
GCF_001687605.2_WP_033541967.1	MQEGTVKWFNSEKGFGFIEVEGGDDVFVHFSAIQGEGFKTLDEGQRVEFEVEEGNRGPQATNVTKL	ATGCAAGAAGGTACAGTAAAATGGTTTAACTCAGAAAAAGGTTTCGGCTTCATCGAAGTTGAAGGCGGAGACGACGTATTCGTACACTTCTCAGCGATCCAAGGCGAAGGCTTTAAGACGCTTGACGAAGGACAACGCGTGGAATTTGAAGTAGAGGAAGGCAACCGCGGACCTCAAGCTACTAACGTAACTAAACTTTAA
GCF_001687625.2_WP_033541967.1	MQEGTVKWFNSEKGFGFIEVEGGDDVFVHFSAIQGEGFKTLDEGQRVEFEVEEGNRGPQATNVTKL	ATGCAAGAAGGTACAGTAAAATGGTTTAACTCAGAAAAAGGTTTTGGCTTTATCGAAGTTGAAGGCGGCGACGATGTATTCGTACATTTCTCAGCTATTCAAGGCGAAGGCTTTAAAACTCTTGACGAAGGACAACGCGTAGAATTTGAAGTAGAGGAAGGCAACCGCGGACCTCAAGCTACTAACGTAACTAAACTTTAA
GCF_001687625.2_WP_058383049.1	MEQGTVKWFNAEKGFGFIEREAGDDVFVHFSAIQSDGFKSLDEGQTVTFDIEEGQRGLQATNVTKA	ATGGAACAAGGTACAGTGAAATGGTTTAATGCAGAAAAAGGTTTTGGTTTTATCGAGCGTGAAGCAGGAGATGACGTATTCGTACATTTCTCAGCTATCCAAAGCGACGGTTTCAAATCTTTAGACGAAGGTCAAACTGTAACATTTGATATCGAAGAAGGACAACGTGGCCTACAAGCTACAAACGTCACTAAAGCTTAA
GCF_001687665.2_WP_008428384.1	MQEGTVKWFNSEKGFGFIEVEGGDDVFVHFSAIQGEGFKTLDEGQRVEFEVEEGNRGPQATNVTKV	ATGCAAGAAGGAACAGTGAAATGGTTTAACTCAGAAAAAGGCTTTGGTTTTATCGAAGTTGAAGGCGGCGACGATGTATTCGTACATTTCTCAGCTATCCAAGGCGAAGGCTTTAAAACACTCGACGAAGGTCAACGCGTTGAATTTGAAGTAGAAGAAGGCAACCGCGGACCTCAAGCAACAAACGTAACTAAAGTCTAA
GCF_001700985.1_WP_003251474.1	MQRGKVKWFNNEKGYGFIEVEGGSDVFVHFTAIQGEGFKTLEEGQEVSFEIVQGNRGPQAANVVKL	ATGCAACGCGGTAAAGTAAAATGGTTTAACAATGAGAAAGGTTATGGTTTTATTGAAGTGGAAGGCGGTTCTGACGTATTCGTTCACTTCACAGCGATCCAAGGTGAAGGGTTCAAAACTTTAGAAGAAGGTCAAGAAGTTTCGTTTGAAATCGTGCAAGGAAACCGTGGACCTCAAGCTGCTAACGTTGTAAAATTATAA
GCF_001702155.1_WP_054708128.1	MEQGTVKWFNADKGYGFITLENGSDVFVHFSAIQADGFKTLEEGQHVTLDVEEGDRGPQAANVTVA	ATGGAACAAGGTACTGTTAAATGGTTCAACGCTGACAAGGGTTACGGTTTTATCACTTTGGAAAACGGCTCAGACGTTTTCGTTCACTTCTCAGCTATCCAAGCTGACGGCTTCAAGACTCTTGAAGAAGGCCAACACGTAACCTTAGACGTTGAAGAAGGCGACCGCGGCCCACAAGCTGCTAACGTCACTGTTGCTTAA
GCF_001702215.1_WP_014215751.1	MEQGTVKWFNADKGFGFITREDGSDVFVHFSAIQGEGFKTLEEGQAVTFDVEESDRGPQAVNVVKA	ATGGAACAAGGTACAGTTAAGTGGTTTAATGCTGATAAAGGTTTTGGTTTCATCACACGCGAAGATGGAAGTGACGTATTCGTTCACTTCTCAGCTATTCAAGGTGAAGGTTTCAAGACTCTTGAAGAAGGTCAAGCAGTTACTTTTGATGTAGAAGAAAGCGACCGTGGACCACAAGCAGTAAACGTTGTTAAAGCTTAA
GCF_001703515.1_WP_029090663.1	MANGKVKWFNAEKGFGFIEREDGDDVFVHFSAIQSDGFKSLDEGQAVSFDVEDGQRGPQAANVVKD	ATGGCAAACGGTAAAGTAAAATGGTTTAACGCAGAAAAAGGTTTCGGTTTTATCGAACGCGAAGATGGCGATGATGTATTCGTACATTTCTCAGCGATCCAATCTGATGGTTTCAAATCATTAGACGAAGGTCAAGCAGTATCTTTCGACGTTGAAGATGGTCAACGCGGTCCTCAAGCAGCTAACGTTGTTAAAGACTAA
GCF_001703515.1_WP_029091754.1	METGKVKWFNSEKGFGFIERENGDDVFVHFSAIQSEGFKTLEEGQAVTFEVEDGQRGPQAANVDKA	ATGGAAACAGGTAAAGTAAAATGGTTTAACTCAGAAAAAGGTTTTGGTTTTATCGAACGCGAAAACGGCGACGATGTATTTGTACATTTCTCAGCTATCCAATCTGAAGGATTCAAAACTTTAGAAGAAGGCCAAGCTGTTACTTTTGAAGTAGAAGATGGTCAACGTGGACCTCAAGCTGCTAACGTTGATAAAGCGTAA
GCF_001703515.1_WP_029092585.1	MHTGKVKWFNNEQGYGFLETEGGSDIFVHFTAIQGEGFKTLDEGQAVTFDIIEGTRGPQAANVVKTQN	ATGCATACTGGAAAAGTTAAATGGTTTAATAATGAACAAGGTTACGGTTTTTTAGAGACTGAGGGTGGCTCAGATATTTTTGTTCACTTTACAGCAATACAAGGCGAAGGCTTTAAAACGCTAGATGAAGGTCAAGCTGTTACATTTGATATTATTGAAGGTACGCGTGGTCCTCAAGCGGCTAATGTAGTTAAAACACAAAATTAA
GCF_001703555.1_WP_034569066.1	MEKGTVKWFNSEKGFGFIEVEGGEDVFVHFSAITGDGFKTLEEGQPVEFEIVEGNRGAQAANVVKL	ATGGAAAAAGGTACAGTAAAATGGTTTAACAGTGAAAAAGGTTTTGGCTTTATCGAAGTAGAAGGCGGAGAAGATGTATTCGTACATTTTAGCGCAATTACAGGTGACGGTTTTAAAACACTTGAAGAAGGCCAACCAGTAGAATTCGAAATCGTTGAAGGAAATCGTGGCGCACAAGCAGCTAACGTTGTAAAACTATAA
GCF_001703555.1_WP_034571318.1	MEQGTVKWFNAEKGFGFIERENGDDVFVHFSAIGGDGFKTLEEGQAVSFEVEEGNRGPQAANVEKA	ATGGAACAAGGTACAGTAAAATGGTTTAACGCAGAAAAAGGTTTTGGTTTTATCGAACGCGAAAATGGTGACGATGTATTCGTACATTTCTCAGCTATCGGTGGAGACGGATTCAAAACTTTAGAAGAAGGACAAGCAGTTTCTTTCGAAGTTGAAGAAGGTAACCGTGGACCTCAAGCAGCTAACGTTGAAAAAGCGTAA
GCF_001708425.1_WP_024779302.1	MSGKVKWFNNAKGYGFILASGRDEDLFAHFSAIRMDGYKTLKAGQPVTFEVIQGPKGLHAVNISPVEVESTSIPEKVKVKTRVTETH	ATGAGTGGCAAGGTGAAATGGTTCAACAACGCCAAGGGCTACGGCTTTATTCTGGCGTCTGGCAGGGATGAAGACCTTTTCGCGCATTTTTCGGCAATCAGGATGGACGGTTATAAAACCCTGAAGGCCGGGCAGCCCGTGACATTCGAAGTGATCCAGGGCCCCAAGGGCCTGCATGCGGTCAACATTTCGCCGGTCGAGGTTGAAAGCACCTCCATCCCCGAAAAAGTCAAAGTCAAAACCAGAGTCACCGAAACCCATTGA
GCF_001712815.1_WP_014124359.1	MEQGTVKWFNAEKGYGFISREDGSDVFVHFSAIQEEGFKTLEEGQSVSFDVEESDRGPQAVNVVKV	ATGGAACAAGGTACAGTAAAATGGTTTAACGCAGAAAAAGGTTACGGGTTTATCTCTCGTGAAGACGGAAGTGACGTGTTTGTCCACTTTTCAGCAATTCAAGAAGAAGGCTTCAAAACTTTAGAAGAAGGACAATCTGTGTCATTTGACGTTGAAGAATCAGATCGTGGTCCTCAAGCTGTTAATGTTGTAAAAGTATAG
GCF_001712815.1_WP_014125014.1	METGTVKWFNAEKGYGFITGEDGNDVFVHFSAIQEEGFKTLEEGQSVNFDIEEGQRGPQATNVVKA	ATGGAAACAGGAACAGTTAAATGGTTCAACGCAGAAAAAGGCTATGGCTTTATCACAGGTGAAGATGGAAACGACGTATTCGTTCACTTTTCAGCTATCCAAGAAGAAGGTTTCAAAACTTTAGAAGAAGGCCAATCTGTTAACTTCGATATCGAAGAAGGACAACGTGGACCACAAGCTACTAATGTAGTAAAAGCTTAA
GCF_001718335.1_WP_004196460.1	MATGIVKWFNDAKGFGFITPDEGGEDLFAHFSAINMQGFKTLKEGQKVSFEVVQGPKGKQASNIQAA	ATGGCAACTGGTATCGTTAAGTGGTTCAACGACGCGAAGGGCTTCGGTTTCATCACTCCCGACGAGGGCGGTGAAGATCTGTTTGCGCACTTCTCGGCCATCAACATGCAGGGCTTCAAGACCCTGAAGGAAGGCCAGAAGGTGAGCTTCGAGGTCGTTCAAGGGCCGAAGGGCAAGCAAGCGTCGAACATCCAGGCCGCGTAA
GCF_001718335.1_WP_006477070.1	MATGTVKWFNDAKGFGFITPEGGGDDLFAHFSEIRVEGFKTLQENQKVEFEVKTGPKGLQAANIRPV	ATGGCAACCGGTACCGTCAAGTGGTTCAATGACGCAAAGGGCTTCGGCTTCATCACCCCGGAAGGCGGCGGCGACGATCTGTTCGCGCACTTCTCGGAAATCCGCGTCGAAGGCTTCAAGACGCTGCAAGAAAACCAGAAGGTTGAATTCGAAGTGAAGACGGGCCCGAAGGGTCTGCAAGCTGCGAACATCCGTCCGGTCTAA
GCF_001718535.1_WP_006477070.1	MATGTVKWFNDAKGFGFITPEGGGDDLFAHFSEIRVEGFKTLQENQKVEFEVKTGPKGLQAANIRPV	ATGGCAACCGGTACCGTCAAGTGGTTCAATGACGCAAAGGGCTTCGGCTTCATCACCCCGGAAGGCGGCGGCGACGATCTGTTCGCGCACTTCTCGGAAATCCGCGTCGAAGGCTTCAAGACGCTGCAAGAAAACCAGAAGGTTGAATTCGAAGTGAAGACGGGCCCGAAGGGTCTGCAAGCTGCGAACATCCGTCCGGTCTAA
GCF_001718535.1_WP_006488945.1	MATGIVKWFNDAKGFGFITPDEGGEDLFAHFSAITMNGFKTLKEGQKVSFDVVQGPKGKQASNIQAV	ATGGCAACTGGTATCGTTAAATGGTTCAACGACGCGAAGGGCTTCGGTTTCATCACTCCCGACGAGGGCGGTGAGGATCTGTTTGCGCACTTCTCGGCTATCACCATGAATGGCTTCAAGACGCTGAAGGAAGGCCAGAAGGTGAGCTTTGACGTCGTCCAAGGGCCGAAGGGCAAGCAAGCGTCGAACATCCAGGCCGTATAA
GCF_001718555.1_WP_006477070.1	MATGTVKWFNDAKGFGFITPEGGGDDLFAHFSEIRVEGFKTLQENQKVEFEVKTGPKGLQAANIRPV	ATGGCAACCGGTACCGTCAAGTGGTTCAATGACGCAAAGGGCTTCGGCTTCATCACCCCGGAAGGCGGCGGCGACGATCTGTTCGCGCACTTCTCGGAAATCCGCGTCGAAGGCTTCAAGACGCTGCAAGAAAACCAGAAGGTTGAATTCGAAGTGAAGACGGGCCCGAAGGGTCTGCAAGCTGCGAACATCCGTCCGGTCTAA
GCF_001718555.1_WP_006488945.1	MATGIVKWFNDAKGFGFITPDEGGEDLFAHFSAITMNGFKTLKEGQKVSFDVVQGPKGKQASNIQAV	ATGGCAACTGGTATCGTTAAGTGGTTCAACGACGCGAAGGGCTTCGGTTTCATCACTCCCGACGAGGGCGGTGAGGATCTGTTTGCGCACTTTTCGGCTATCACCATGAATGGCTTCAAGACGCTGAAGGAAGGCCAGAAGGTGAGCTTTGACGTCGTCCAAGGGCCGAAGGGCAAGCAAGCGTCGAACATCCAGGCCGTATAA
GCF_001718635.1_WP_004196460.1	MATGIVKWFNDAKGFGFITPDEGGEDLFAHFSAINMQGFKTLKEGQKVSFEVVQGPKGKQASNIQAA	ATGGCAACTGGTATTGTCAAATGGTTCAATGACGCGAAGGGCTTCGGTTTCATCACGCCCGACGAAGGCGGCGAAGATCTGTTTGCACATTTCTCGGCGATCAACATGCAGGGCTTCAAGACCCTGAAGGAAGGCCAAAAGGTCAGCTTCGAGGTGGTGCAAGGCCCGAAGGGTAAGCAAGCGTCGAACATCCAAGCTGCTTGA
GCF_001718635.1_WP_004196837.1	MATGTVKWFNDAKGFGFITPEGGGEDLFAHFSEIRVDGFKTLQENQKVEFEVKTGPKGLQAANIKPL	ATGGCAACCGGTACCGTCAAGTGGTTCAACGACGCTAAGGGTTTTGGTTTCATCACGCCGGAAGGCGGCGGCGAAGATCTCTTCGCGCACTTCTCGGAAATCCGCGTCGACGGCTTCAAGACGCTGCAAGAGAACCAGAAGGTCGAGTTTGAAGTGAAGACCGGCCCGAAGGGCCTGCAGGCAGCGAACATCAAGCCGCTGTAA
GCF_001718895.1_WP_006477070.1	MATGTVKWFNDAKGFGFITPEGGGDDLFAHFSEIRVEGFKTLQENQKVEFEVKTGPKGLQAANIRPV	ATGGCAACCGGTACCGTCAAGTGGTTCAATGACGCAAAGGGCTTCGGCTTCATCACCCCGGAAGGCGGCGGCGACGATCTGTTCGCGCACTTCTCGGAAATCCGCGTCGAAGGCTTCAAGACGCTGCAAGAAAACCAGAAGGTTGAATTCGAAGTGAAGACGGGCCCGAAGGGTCTGCAAGCTGCGAACATCCGTCCGGTCTAA
GCF_001718895.1_WP_006488945.1	MATGIVKWFNDAKGFGFITPDEGGEDLFAHFSAITMNGFKTLKEGQKVSFDVVQGPKGKQASNIQAV	ATGGCAACTGGTATCGTTAAGTGGTTCAACGACGCGAAGGGCTTCGGTTTCATCACTCCCGATGAGGGCGGTGAGGATCTGTTTGCGCACTTCTCGGCTATCACCATGAATGGCTTCAAGACGCTGAAGGAAGGCCAGAAGGTGAGCTTTGACGTCGTCCAAGGGCCGAAGGGCAAGCAAGCGTCGAACATCCAGGCCGTATAA
GCF_001718955.1_WP_004196460.1	MATGIVKWFNDAKGFGFITPDEGGEDLFAHFSAINMQGFKTLKEGQKVSFEVVQGPKGKQASNIQAA	ATGGCAACTGGTATTGTCAAATGGTTCAATGACGCGAAGGGCTTCGGTTTCATCACCCCCGACGAGGGCGGTGAGGATCTGTTCGCACACTTCTCGGCCATCAACATGCAGGGCTTCAAGACCCTGAAGGAAGGCCAGAAGGTCAGCTTCGAGGTCGTTCAAGGACCGAAAGGCAAGCAGGCTTCGAATATCCAAGCTGCCTGA
GCF_001718955.1_WP_006400508.1	MATGTVKWFNDAKGFGFITPEGGGDDLFAHFSEIRVEGFKTLQENQKVEFEVKTGPKGLQAANIRPL	ATGGCAACCGGTACCGTCAAGTGGTTCAATGACGCTAAGGGCTTCGGCTTCATCACCCCGGAAGGCGGCGGCGACGATCTGTTCGCGCACTTCTCGGAAATCCGCGTCGAAGGCTTCAAGACGCTGCAAGAAAACCAAAAGGTCGAATTCGAAGTGAAGACGGGCCCGAAGGGTCTGCAAGCTGCGAACATTCGCCCGCTGTAA
GCF_001721185.1_WP_010847246.1	MSDKMKGQVKWFNESKGFGFITPADGSKDVFVHFSAIQGNGFKTLAEGQNVEFTIENGAKGPAAANVTAI	ATGTCTGACAAAATGAAAGGTCAAGTGAAGTGGTTCAACGAGTCTAAAGGCTTTGGTTTCATCACTCCAGCTGATGGTAGCAAAGACGTATTCGTACACTTCTCTGCCATTCAAGGTAACGGCTTCAAAACTCTGGCAGAAGGCCAGAATGTAGAATTCACCATTGAGAATGGTGCCAAAGGCCCAGCAGCAGCAAACGTAACTGCTATCTAA
GCF_001721185.1_WP_045969514.1	MSKIKGNVKWFNESKGFGFITPEDGSKDVFVHFSAIQSNGFKTLAEGQKVEFEITEGAKGPSAANVVAI	ATGTCAAAAATTAAAGGTAACGTTAAGTGGTTTAATGAATCCAAAGGATTCGGTTTTATCACTCCAGAAGATGGTAGCAAAGATGTTTTTGTGCACTTTTCCGCCATTCAGTCTAACGGATTCAAGACTTTAGCCGAAGGCCAAAAAGTCGAGTTTGAAATTACTGAGGGCGCTAAAGGTCCATCTGCTGCGAACGTTGTCGCAATCTAA
GCF_001721185.1_WP_069314953.1	MSNTMTGLVKWFNNDKGFGFISPKDGSKDVFVHYSAIQGNDFKSLDEGQEVSFTIENGMKGPAAANVVPL	ATGTCTAATACAATGACTGGTTTAGTAAAATGGTTTAATAACGATAAAGGCTTCGGTTTTATCTCTCCAAAAGATGGCAGCAAAGATGTGTTTGTTCACTATTCTGCAATCCAAGGTAATGATTTTAAAAGCTTAGATGAAGGGCAAGAAGTTTCATTTACCATCGAAAATGGTATGAAAGGCCCAGCAGCTGCAAATGTGGTGCCTCTCTAA
GCF_001721185.1_WP_069315367.1	MAKITGTVKWFNESKGFGFITPADGSKDVFVHFSAIMKDGFKTLSEGQKVEFEIQDGPKGPAAANVSAL	ATGGCAAAAATCACTGGTACTGTGAAGTGGTTCAACGAGTCTAAAGGTTTTGGTTTTATTACTCCAGCAGATGGTAGCAAAGATGTATTCGTACATTTTTCTGCGATTATGAAAGATGGGTTTAAAACATTGTCTGAAGGCCAAAAAGTTGAGTTTGAAATTCAGGATGGTCCTAAAGGCCCTGCCGCCGCAAACGTCTCAGCTTTATAG
GCF_001721185.1_WP_069316405.1	METGTVKWFNNAKGFGFICPASGGDDIFAHYSTIQMDGYRTLKAGQKVNFSVHQGPKGNHASLILPLDDDQKSKKNDVINS	ATGGAAACAGGTACTGTTAAATGGTTCAATAATGCAAAGGGCTTTGGATTTATTTGCCCAGCTAGCGGCGGCGATGACATTTTCGCTCACTATTCAACTATTCAGATGGATGGTTATAGGACGTTAAAAGCTGGGCAAAAAGTGAATTTTAGTGTTCATCAAGGCCCCAAAGGTAATCACGCCAGCCTTATTCTGCCTTTAGACGATGACCAAAAATCAAAAAAGAATGATGTAATAAATTCGTAA
GCF_001721685.1_WP_013173349.1	MTQGTVKWFNAEKGFGFIEVEGQDDVFVHFSAIQGEGFKTLEEGQAVTFDIEQGQRGPQAANVQK	ATGACACAAGGTACAGTAAAATGGTTTAACGCAGAAAAAGGTTTCGGTTTCATCGAGGTAGAAGGACAGGACGACGTATTCGTACACTTCTCCGCGATCCAAGGCGAAGGCTTCAAAACACTTGAAGAAGGCCAAGCCGTTACTTTTGACATCGAGCAAGGTCAGCGTGGACCACAAGCTGCCAACGTGCAAAAGTAA
GCF_001721685.1_WP_069364044.1	MTQGTVKWFNAEKGFGFIEVEGQDDVFVHFSAIQGEGFKSLDEGQTVNFDIEQGQRGPQAANVQK	ATGACACAAGGTACAGTAAAATGGTTTAATGCAGAAAAAGGTTTCGGTTTCATCGAAGTTGAAGGACAGGACGATGTATTCGTACACTTCTCCGCGATCCAAGGCGAAGGCTTCAAATCACTTGACGAAGGTCAAACAGTAAACTTCGACATCGAGCAAGGCCAGCGTGGCCCACAGGCGGCTAACGTACAGAAGTAA
GCF_001721685.1_WP_069366327.1	MTQGTVKWFNAEKGFGFIEIEGQDDVFVHFSAIEGEGFKTLDEGQTVNFDIEQGQRGPQAANVQK	ATGACACAAGGTACAGTAAAATGGTTTAATGCAGAAAAAGGTTTCGGTTTCATCGAAATTGAAGGCCAGGACGACGTATTCGTTCACTTTTCCGCGATCGAAGGCGAAGGTTTCAAAACACTTGACGAAGGCCAGACAGTCAATTTCGACATCGAGCAAGGCCAGCGTGGCCCCCAAGCGGCTAACGTACAGAAGTAA
GCF_001721685.1_WP_198155014.1	MMTGTVKWFNAEKGFGFIEREDGDDVFVHFSAIQAEGFKTLDEGQTVEFEIVEGNRGPQAANVVKQ	ATGATGACAGGCACAGTAAAATGGTTTAACGCAGAAAAAGGATTTGGATTTATCGAACGCGAAGATGGTGACGATGTATTCGTACACTTCTCAGCGATTCAAGCTGAAGGATTCAAGACGCTTGATGAAGGTCAGACTGTTGAATTCGAAATCGTCGAAGGAAACCGTGGACCACAGGCAGCAAACGTCGTAAAGCAGTAA
GCF_001729805.1_WP_001062678.1	MAKIKGQVKWFNESKGFGFITPADGSKDVFVHFSAIQGNGFKTLAEGQNVEFEIQDGQKGPAAVNVTAI	ATGGCAAAGATTAAAGGTCAAGTTAAGTGGTTCAACGAGTCTAAAGGTTTTGGTTTCATTACTCCTGCTGACGGCAGCAAAGACGTGTTCGTACACTTCTCTGCAATCCAGGGTAACGGCTTCAAAACTCTGGCTGAAGGCCAGAACGTTGAGTTCGAAATTCAGGACGGCCAGAAAGGCCCAGCTGCAGTTAACGTAACTGCTATCTGA
GCF_001729805.1_WP_002439184.1	MSKIKGNVKWFNESKGFGFITPEDGSKDVFVHFSAIQSNGFKTLAEGQRVEFEITNGAKGPSAANVIAL	ATGTCTAAGATTAAAGGTAACGTTAAGTGGTTTAATGAGTCCAAAGGATTCGGTTTCATTACTCCTGAAGATGGCAGCAAAGACGTGTTCGTACACTTCTCTGCAATCCAGTCTAATGGTTTCAAAACTCTGGCTGAAGGTCAGCGTGTAGAGTTCGAAATCACTAACGGTGCCAAAGGCCCTTCTGCTGCTAACGTAATCGCTCTGTAA
GCF_001729805.1_WP_003860775.1	MSAKMTGLVKWFNADKGFGFITPDDGSKDVFVHFSAIQNDGYKSLDEGQKVSFTIESGAKGPAAGNVVSL	ATGTCTGCTAAAATGACTGGTCTGGTAAAATGGTTCAACGCTGATAAAGGTTTCGGCTTCATCACTCCTGACGATGGCTCTAAAGACGTGTTCGTACACTTCTCTGCTATCCAGAACGATGGCTATAAATCTCTGGACGAAGGTCAGAAAGTGTCCTTCACCATCGAAAGCGGCGCTAAAGGCCCAGCAGCTGGTAACGTTGTAAGCCTGTAA
GCF_001729805.1_WP_008499993.1	MEMGTVKWFNNAKGFGFICPEGGGEDIFAHYSTIQMDGYRTLKAGQSVRFDVHQGPKGNHASLIVPIEAETVA	ATGGAAATGGGTACTGTTAAGTGGTTCAACAACGCCAAAGGGTTTGGCTTCATCTGCCCCGAAGGCGGCGGCGAGGATATCTTCGCTCACTATTCCACCATTCAGATGGATGGTTACAGAACGCTCAAAGCCGGGCAGTCCGTCCGGTTCGATGTCCACCAGGGACCAAAAGGCAATCATGCAAGCCTTATCGTCCCCATTGAAGCAGAGACGGTTGCATAG
GCF_001742185.1_WP_005967383.1	METGTVKWFNNAKGFGFICPEGGGDDIFAHYSTIQMDGYRTLKAGQVVRFDVHQGPKGNHACLIVPQIVEAIS	ATGGAGACAGGTACTGTTAAATGGTTCAATAATGCCAAAGGGTTTGGTTTTATCTGTCCAGAAGGGGGCGGTGACGATATCTTCGCACACTACTCAACCATTCAGATGGATGGCTACCGAACGCTGAAAGCCGGACAGGTTGTCAGATTTGACGTACATCAAGGGCCGAAAGGCAATCATGCTTGCCTGATCGTCCCGCAAATCGTCGAGGCCATATCCTGA
GCF_001742185.1_WP_005967874.1	MSNKMTGLVKWFDAGKGFGFITPDNGSKDVFVHFSAIQSNDFKTLDEGQKVEFTIENGQKGPSAGNVVAL	ATGTCTAATAAAATGACTGGTTTAGTAAAATGGTTTGACGCTGGTAAAGGTTTTGGTTTCATTACTCCTGACAACGGTAGCAAAGATGTATTCGTACATTTCTCTGCAATCCAGAGCAACGACTTCAAAACTCTGGACGAAGGCCAAAAGGTTGAGTTCACCATTGAAAATGGTCAGAAAGGCCCATCAGCCGGTAACGTTGTTGCACTGTAA
GCF_001742185.1_WP_005968829.1	MAKIKGQVKWFNESKGFGFITPADGSKDVFVHFSAIQGNGFKTLAEGQNVEFEIQDGQKGPSAVNVTAL	ATGGCAAAGATTAAAGGTCAGGTTAAGTGGTTCAACGAGTCTAAAGGCTTTGGTTTCATCACTCCTGCTGACGGCAGCAAAGATGTATTCGTACACTTCTCTGCAATTCAAGGCAACGGCTTCAAAACTCTGGCTGAAGGCCAGAACGTAGAATTCGAAATTCAGGATGGCCAGAAAGGTCCTTCTGCAGTAAACGTCACTGCGCTGTAA
GCF_001742185.1_WP_005976270.1	MSKIKGSVKWFNESKGFGFITPEDGSKDVFVHFSAIQSNGFKTLAEGQRVEFEITDGAKGPSAANVNAI	ATGTCTAAGATTAAAGGTAGTGTTAAGTGGTTTAATGAGTCGAAAGGCTTCGGTTTCATTACTCCAGAAGACGGTAGCAAAGATGTGTTCGTACACTTCTCTGCAATCCAGAGCAATGGTTTCAAAACTCTGGCTGAAGGTCAGCGTGTAGAGTTCGAAATCACTGATGGTGCCAAAGGTCCTTCTGCTGCTAACGTTAACGCTATTTAA
GCF_001750685.1_WP_069975639.1	MKQGTVKWFNNEKGFGFIEVAGEPDVFVHFSAITGDGYKSLEEGQKVEFEITEGNRGPQAANVVKL	ATGAAACAAGGAACAGTAAAATGGTTTAACAATGAAAAAGGATTTGGATTCATCGAAGTAGCAGGTGAGCCAGATGTATTCGTACATTTCTCAGCAATTACTGGTGATGGTTATAAGTCATTAGAAGAAGGCCAAAAAGTTGAATTCGAAATTACTGAAGGCAACCGTGGACCACAAGCTGCGAATGTAGTTAAGTTATAG
GCF_001750725.1_WP_001062678.1	MAKIKGQVKWFNESKGFGFITPADGSKDVFVHFSAIQGNGFKTLAEGQNVEFEIQDGQKGPAAVNVTAI	ATGGCAAAGATTAAAGGTCAAGTTAAGTGGTTCAACGAGTCTAAAGGTTTTGGTTTCATTACTCCTGCTGACGGCAGCAAAGACGTGTTCGTACACTTCTCTGCAATCCAGGGTAACGGCTTCAAAACTCTGGCTGAAGGCCAGAACGTTGAGTTCGAAATTCAGGACGGCCAGAAAGGCCCAGCTGCAGTTAACGTAACTGCTATCTGA
GCF_001750725.1_WP_002439184.1	MSKIKGNVKWFNESKGFGFITPEDGSKDVFVHFSAIQSNGFKTLAEGQRVEFEITNGAKGPSAANVIAL	ATGTCTAAGATTAAAGGTAACGTTAAGTGGTTTAATGAGTCCAAAGGATTCGGTTTCATTACTCCTGAAGATGGCAGCAAAGACGTGTTCGTACACTTCTCTGCAATCCAGTCTAATGGTTTCAAAACTCTGGCTGAAGGTCAGCGTGTAGAGTTCGAAATCACTAACGGTGCCAAAGGCCCTTCTGCTGCTAACGTAATCGCTCTGTAA
GCF_001750725.1_WP_008499993.1	MEMGTVKWFNNAKGFGFICPEGGGEDIFAHYSTIQMDGYRTLKAGQSVRFDVHQGPKGNHASLIVPIEAETVA	ATGGAAATGGGTACTGTTAAGTGGTTCAACAACGCCAAAGGGTTTGGCTTCATCTGCCCCGAAGGCGGCGGCGAGGATATCTTCGCTCACTATTCCACCATTCAGATGGATGGTTACAGAACGCTCAAAGCCGGGCAGTCCGTCCGGTTCGATGTACACCAGGGACCAAAAGGCAATCATGCAAGCCTGATCGTACCCATTGAAGCAGAAACGGTCGCATAG
GCF_001750725.1_WP_014168131.1	MSAKMTGLVKWFNADKGFGFITPDDGSKDVFVHFSAIQNEGYKSLDEGQKVSFTIESGAKGPAAGNVVSL	ATGTCTGCTAAAATGACTGGTCTGGTAAAATGGTTCAACGCTGATAAAGGTTTCGGCTTCATCACTCCTGACGATGGCTCTAAAGACGTGTTCGTACACTTCTCTGCTATCCAGAACGAAGGCTACAAATCTCTGGATGAAGGTCAGAAAGTTTCCTTCACCATCGAAAGCGGCGCTAAAGGCCCAGCAGCTGGTAACGTTGTAAGCCTGTAA
GCF_001750725.1_WP_014170400.1	MSNKMTGLVKWFNSDKGFGFITPDDGSKDVFVHFSAIQSDSYKSLDEGQKVSFTIENGAKGPAAGNVSPL	ATGTCTAATAAAATGACTGGTTTAGTAAAATGGTTTAACTCTGATAAAGGTTTTGGCTTTATCACTCCTGACGACGGCAGCAAAGATGTATTCGTACACTTCTCTGCTATTCAGAGCGACAGCTACAAATCTCTTGATGAAGGCCAGAAAGTGTCCTTCACCATTGAAAATGGCGCTAAAGGCCCAGCAGCGGGTAACGTTTCTCCGCTGTAA
GCF_001750725.1_WP_014170702.1	MSSRIIGLVKWFNEDKGFGFISPVDGSKDVFVHFSALQGDDFKTLFEGQKVEFAIQSGEKGPAAASVILCDR	ATGTCTTCAAGAATTATAGGTTTGGTTAAGTGGTTTAACGAAGATAAAGGTTTCGGTTTTATCTCTCCTGTCGATGGCAGCAAAGATGTGTTTGTGCACTTTTCTGCTCTGCAGGGTGATGATTTTAAAACTCTCTTTGAAGGCCAGAAGGTCGAATTTGCTATCCAGAGTGGCGAAAAAGGCCCTGCTGCTGCAAGCGTAATACTTTGCGATAGATAA
GCF_001750725.1_WP_025203826.1	MSRKMTGIVKSFDMHSGKGLIIPSDGRKDVFLHISAFNNNEKETLLPGIRVEFCRINGLSGPMAANVYLS	TTGTCTCGTAAAATGACAGGAATTGTCAAAAGTTTTGATATGCACAGTGGCAAAGGCCTAATCATCCCTTCAGATGGTCGAAAGGACGTTTTTCTCCACATTTCAGCCTTTAATAACAACGAAAAAGAAACGCTCCTTCCCGGGATTCGCGTTGAGTTCTGTCGTATCAACGGACTCAGCGGACCGATGGCCGCAAATGTCTATCTTTCATAA
GCF_001750725.1_WP_032681777.1	MTYRITGLVKWFNEDKGFGFISPLDGSKDIVVHFPKLNVDNFKTLFEGQKVEFAIQIGDKGPAAANVILCDK	ATGACCTATAGAATTACAGGCCTGGTAAAATGGTTTAACGAAGACAAAGGTTTTGGCTTCATCTCTCCTCTTGATGGCAGCAAAGATATCGTTGTCCATTTTCCTAAGCTTAATGTCGACAACTTTAAAACTTTATTTGAAGGACAGAAAGTTGAATTCGCCATTCAGATCGGAGACAAAGGTCCTGCTGCTGCAAACGTAATACTTTGCGATAAATAA
GCF_001750725.1_WP_071993114.1	MSHKMTGIVKSFDILSGKGLIIPSDGRKDVLLHISSVNSRESELLIRGRRIEFCRINGLRGPVAANIYLS	TTGTCCCATAAAATGACAGGAATTGTCAAAAGCTTTGACATTCTTAGTGGTAAAGGCCTCATCATCCCATCTGATGGAAGAAAAGACGTTCTGCTTCACATTTCATCCGTTAACTCCCGCGAATCAGAATTACTCATCCGTGGAAGGCGCATAGAATTTTGCCGGATAAACGGTCTCAGGGGGCCTGTGGCTGCGAACATTTATCTTTCCTGA
GCF_001753205.1_WP_075527843.1	MKQGTVKWFNAEKGFGFIEVENEDDVFVHFSAIEGEGFKSLDEGQQVEFEVVEGDRGPQAANVVKLV	ATGAAACAAGGTACAGTAAAATGGTTTAACGCAGAAAAAGGTTTTGGCTTCATCGAAGTTGAAAACGAAGACGACGTGTTCGTACACTTCTCAGCTATCGAAGGAGAAGGATTCAAGTCACTTGACGAAGGTCAACAAGTTGAATTCGAAGTTGTTGAAGGCGACCGCGGCCCACAAGCTGCAAACGTTGTAAAACTAGTCTAA
GCF_001831495.1_WP_068546327.1	MANGTVKWFNNAKGFGFICPEEGGEDIFAHYSTIQMDGYRTLKAGQPVDYELHEGPKGCHASSVKPVGE	ATGGCTAACGGTACAGTTAAATGGTTTAACAACGCCAAGGGTTTCGGTTTCATTTGTCCAGAAGAAGGTGGTGAAGATATCTTCGCTCACTATTCAACAATACAGATGGATGGTTATCGCACATTAAAAGCAGGCCAACCTGTTGATTATGAGCTACATGAAGGTCCTAAGGGCTGTCATGCATCTAGTGTAAAGCCGGTCGGCGAATAA
GCF_001857925.1_WP_003212277.1	MLEGKVKWFNSEKGFGFIEVEGQDDVFVHFSAIQGEGFKTLEEGQAVSFEIVEGNRGPQAANVNKA	ATGTTAGAAGGTAAAGTAAAATGGTTCAACTCTGAAAAAGGTTTCGGATTCATCGAAGTAGAAGGTCAAGACGATGTATTCGTTCACTTCTCTGCTATCCAAGGCGAAGGCTTCAAAACTTTAGAAGAAGGTCAAGCAGTTTCTTTCGAAATCGTTGAAGGTAACCGTGGACCACAAGCTGCTAACGTTAACAAAGCGTAA
GCF_001857925.1_WP_003215784.1	MQNGKVKWFNNEKGFGFIEVEGGDDVFVHFTAIEGDGYKSLEEGQEVSFEIVEGNRGPQAANVTKI	ATGCAAAACGGTAAAGTAAAATGGTTCAATAATGAAAAAGGTTTCGGCTTCATTGAAGTTGAAGGCGGAGACGATGTATTCGTTCACTTCACAGCTATCGAAGGTGACGGTTACAAGTCTTTAGAAGAAGGACAAGAAGTTTCTTTTGAAATCGTTGAAGGTAATCGTGGACCTCAAGCAGCTAACGTAACAAAAATTTAA
GCF_001857945.1_WP_036651712.1	MQTGTVKWFNADKGFGFIEVEGGSDVFVHFSAITGDGFKTLDEGQRVQFNVVEGNRGPQAENVVKL	ATGCAAACAGGTACAGTAAAATGGTTTAACGCAGACAAAGGTTTCGGTTTCATCGAAGTAGAAGGCGGAAGCGACGTTTTCGTTCACTTCTCAGCTATCACTGGTGACGGATTCAAAACTTTGGACGAAGGACAACGTGTTCAGTTCAACGTAGTTGAAGGAAACCGTGGACCACAAGCAGAAAACGTAGTAAAACTGTAA
GCF_001857945.1_WP_068656256.1	MKGTVKWFNAEKGYGFIQVEAGDDVFVHFSAIQGEGYKTLDEGQTVEFEITEGNRGPQASNVLKLG	TTGAAAGGAACAGTTAAATGGTTTAATGCAGAAAAGGGATATGGATTCATTCAAGTGGAAGCAGGAGATGATGTGTTTGTTCACTTTTCTGCCATACAAGGTGAAGGCTACAAGACGTTGGATGAAGGTCAAACCGTAGAATTTGAGATCACAGAAGGAAATCGTGGACCACAAGCATCTAACGTATTAAAACTAGGTTAA
GCF_001865575.2_WP_007180251.1	METGTVKWFNDAKGFGFITPDGGGEDLFAHFSEIRTEGFKTLQENQKVTFEVKTGPKGKQAANIKPV	ATGGAAACCGGTACCGTCAAGTGGTTCAATGACGCTAAGGGCTTTGGCTTCATCACTCCCGACGGCGGCGGTGAAGATCTGTTCGCGCATTTCTCGGAAATTCGCACGGAAGGCTTCAAGACGCTGCAAGAAAACCAGAAGGTCACGTTTGAAGTGAAGACGGGCCCGAAGGGCAAGCAAGCGGCTAACATCAAGCCGGTGTAA
GCF_001865575.2_WP_007180614.1	MATGTVKWFNDAKGFGFITPDEGGEDLFAHFSAIQMNGFKTLKEGQKVTFEVVQGPKGKQASNIQAPA	ATGGCAACTGGTACGGTCAAATGGTTCAACGACGCGAAAGGTTTTGGATTCATCACGCCTGACGAGGGCGGCGAGGATCTGTTTGCACACTTCTCGGCCATCCAGATGAATGGGTTCAAGACCCTCAAGGAAGGCCAGAAGGTCACCTTCGAGGTCGTGCAGGGTCCGAAAGGCAAACAGGCATCGAACATTCAGGCGCCAGCCTGA
GCF_001865575.2_WP_027195377.1	MATGTVKWFNDAKGFGFITPDDGGEDLFAHFSEIQSSGFKSLQENQKVTFEVKQGPKGKQAANIQAV	ATGGCAACAGGTACTGTTAAGTGGTTTAACGATGCAAAGGGCTTTGGTTTCATTACGCCGGACGACGGCGGTGAAGACCTGTTCGCGCACTTCTCGGAAATCCAGTCCTCGGGCTTCAAGTCCCTGCAGGAAAACCAGAAAGTGACGTTCGAAGTCAAGCAAGGCCCGAAGGGCAAGCAAGCTGCGAACATCCAGGCGGTCTAA
GCF_001866075.3_WP_071315607.1	MLGKVKWFNAEKGFGFIERENGDDVFVHFSAINTDGFKTLEEGQEVEFEIVEGARGPQAANVTKR	ATGTTAGGAAAAGTTAAATGGTTTAACGCAGAAAAAGGTTTTGGATTTATTGAGCGCGAAAACGGAGACGATGTTTTTGTACATTTCTCAGCTATCAACACTGATGGATTCAAAACATTAGAAGAAGGACAAGAAGTTGAATTTGAAATCGTTGAAGGAGCTCGCGGACCTCAAGCTGCAAACGTTACAAAGCGCTAG
GCF_001866075.3_WP_071318227.1	MPQGKVKWFNAEKGFGFIEVEGQDDVFVHFSAIQGDGFKTLDEGQEVSFEIETGNRGPQAVNVERI	ATGCCACAAGGAAAAGTAAAATGGTTTAACGCAGAAAAAGGCTTCGGATTTATTGAAGTAGAGGGACAGGATGATGTATTTGTTCATTTTTCTGCTATCCAAGGTGATGGTTTCAAAACACTTGATGAAGGTCAAGAAGTAAGCTTTGAAATTGAAACTGGCAACCGTGGACCACAAGCCGTTAACGTGGAAAGAATATAG
GCF_001866075.3_WP_071318253.1	MEHGKVKWFNSEKGFGFIERDGGDDVFVHFSAIQGEGYKSLDEGQEVTFDIENGQRGPQATNVRKA	ATGGAACATGGTAAAGTTAAATGGTTTAACAGTGAAAAAGGTTTTGGGTTCATTGAGCGTGATGGTGGGGATGACGTATTCGTTCACTTCTCAGCTATTCAAGGCGAGGGTTACAAATCATTAGATGAAGGTCAAGAAGTAACTTTTGACATCGAAAATGGTCAACGTGGTCCACAAGCGACTAACGTTCGTAAAGCATAA
GCF_001866075.3_WP_071318469.1	MQNGKVKWFNAEKGFGFIEVEGGNDVFVHFSAIEGEGFKSLEEGQDVSFEVVEGNRGPQAANVTKL	ATGCAAAACGGTAAAGTAAAATGGTTTAACGCTGAAAAAGGTTTCGGATTTATTGAAGTTGAAGGTGGAAACGATGTATTCGTTCACTTTTCTGCTATCGAAGGTGAAGGTTTCAAATCTTTAGAAGAAGGTCAAGATGTTTCTTTTGAAGTTGTTGAAGGTAACCGCGGACCTCAAGCTGCTAACGTTACTAAACTTTAA
GCF_001866075.3_WP_071319455.1	MLQGTVKWFNAEKGFGFIEREGGDDVFVHFSAIQGDGFKSLEEGQKVTFEIVEGNRGAQAANVTKA	ATGTTACAAGGTACAGTTAAGTGGTTTAATGCAGAAAAAGGTTTCGGATTTATCGAGCGCGAAGGTGGAGACGATGTATTCGTTCATTTCTCAGCTATCCAAGGTGACGGATTCAAGTCATTAGAAGAAGGACAAAAAGTAACTTTTGAAATCGTTGAAGGCAACCGCGGTGCGCAAGCTGCTAACGTTACAAAAGCTTAA
GCF_001874605.1_WP_011391770.1	MQGKVKWFNPEKGYGFIEREDGKDVFVHFSAIQEEGFKTLAEGQEVEFDIVEGPRGPQAANVIKC	ATGCAGGGTAAGGTGAAATGGTTTAACCCGGAGAAGGGGTACGGCTTTATTGAAAGGGAAGACGGCAAGGACGTGTTCGTCCACTTCTCCGCCATCCAGGAAGAGGGTTTCAAAACCCTGGCTGAGGGACAGGAGGTCGAGTTTGACATCGTGGAAGGACCTCGCGGTCCCCAGGCAGCCAATGTAATAAAATGCTAG
GCF_001874645.1_WP_071555685.1	MASGKVKWFNNAKGYGFINEDGNDEDLFAHYSAIKMDGYKTLKAGQPVSFEIIQGPKGLHAINIDSATVKANAPAPATTVQHETVLS	ATGGCTAGCGGTAAGGTCAAGTGGTTCAACAATGCCAAGGGATATGGCTTCATCAACGAGGACGGCAACGACGAAGATCTCTTTGCCCACTACTCGGCCATTAAAATGGACGGCTACAAGACCTTGAAAGCAGGCCAGCCCGTGAGTTTCGAGATCATCCAGGGCCCCAAAGGCCTGCACGCGATCAACATCGATTCAGCCACGGTAAAGGCCAACGCGCCCGCGCCAGCAACGACCGTCCAGCACGAGACAGTGCTGAGCTGA
GCF_001877035.1_WP_071611001.1	MKTGTVKWFNSEKGFGFLSVEGEEDVFVHFSAIQGDGYKSLEEGQQVQFEITTGARGPQASNVTRL	ATGAAAACAGGTACAGTTAAATGGTTTAATTCAGAAAAAGGGTTTGGATTTTTATCAGTAGAAGGAGAAGAGGATGTATTCGTACATTTCTCAGCTATTCAAGGAGACGGATACAAATCTTTAGAAGAAGGACAACAAGTCCAATTTGAAATAACTACTGGCGCTAGAGGCCCTCAAGCTTCAAACGTTACTAGATTGTAA
GCF_001878675.1_WP_011064983.1	MTGKVKWFNAEKGFGFIEREDGDDVFVHFSAIQADGFKTLEEGQDVEFEIVEGNRGPQAANVVRL	ATGACTGGTAAAGTAAAATGGTTTAACGCAGAAAAAGGCTTTGGTTTCATCGAGCGCGAAGACGGAGACGATGTATTCGTACATTTCTCAGCTATCCAAGCTGACGGCTTCAAAACGCTTGAAGAAGGTCAAGACGTTGAATTTGAAATCGTAGAAGGTAACCGCGGACCACAAGCAGCTAACGTTGTTCGTCTATAA
GCF_001878675.1_WP_019376924.1	MQEGSVKWFNAEKGFGFIEVEGGDDVFVHFSAIQGEGFKTLEEGQKVSFDIEEGQRGPQATNVVKA	ATGCAAGAAGGTTCAGTAAAATGGTTTAACGCAGAAAAAGGTTTCGGTTTCATCGAAGTTGAAGGTGGAGACGATGTATTCGTACATTTCTCAGCTATCCAAGGTGAAGGATTCAAAACTTTAGAAGAAGGTCAAAAAGTTTCTTTTGATATCGAAGAAGGACAACGCGGACCTCAAGCAACTAACGTTGTTAAGGCGTAA
GCF_001886435.1_WP_012517807.1	MSNSVNGTVKWFNEEKGFGFLTPEAGGKDVFVHFRSIASDGFKTLAEGQEVSFEVEQGQKGPQAANVVVR	ATGTCTAATTCAGTAAACGGCACAGTTAAATGGTTCAACGAAGAAAAAGGTTTTGGTTTCCTAACACCTGAAGCTGGCGGCAAAGATGTATTCGTACACTTCCGTTCAATTGCTTCTGACGGTTTCAAAACTCTTGCTGAAGGCCAAGAAGTTAGCTTTGAAGTTGAACAAGGCCAAAAAGGTCCACAAGCTGCTAACGTAGTTGTTCGATAA
GCF_001886435.1_WP_012519905.1	MSKVTGTVKWFNADKGYGFLTQDNGGKDVFVHFRAIISDGYKTLPEGQRVEFEVEEGQKGLQAANVQAI	ATGTCTAAAGTTACAGGCACAGTTAAGTGGTTCAACGCTGATAAAGGTTACGGTTTTCTAACACAAGATAATGGCGGCAAGGACGTATTCGTTCATTTCCGTGCGATTATCTCTGACGGTTACAAAACGCTTCCAGAAGGTCAGCGAGTAGAATTTGAAGTTGAAGAAGGTCAAAAAGGTCTTCAAGCTGCTAACGTGCAAGCTATCTAA
GCF_001886435.1_WP_014949330.1	MAVGKVKWFNNAKGFGFIVPEDGGEDIFAHYSTIQMEGYRSLKAGQEVTFEVQQGPKGLHAENIGFKEEPER	ATGGCGGTTGGCAAAGTTAAATGGTTTAACAACGCAAAGGGTTTTGGATTTATCGTTCCTGAGGACGGCGGCGAAGATATTTTCGCGCATTACTCTACGATTCAAATGGAAGGCTACCGTTCGCTAAAAGCGGGACAAGAAGTTACGTTCGAAGTACAGCAAGGCCCTAAAGGGCTACACGCTGAGAACATTGGCTTCAAAGAAGAACCAGAGCGTTAA
GCF_001889165.1_WP_026558957.1	MLQGKVKWFNSEKGFGFIEVEGQDDVFVHFSAIQGDGFKTLEEGQTVTFEVEQGARGPQAANVQK	ATGTTACAAGGTAAAGTTAAATGGTTCAATTCAGAAAAAGGTTTCGGTTTCATCGAAGTTGAAGGACAAGACGATGTATTCGTACATTTCTCAGCTATCCAAGGTGACGGTTTCAAAACTTTAGAAGAAGGCCAAACGGTTACTTTTGAAGTTGAGCAAGGAGCTCGTGGACCTCAAGCTGCTAACGTTCAAAAATAA
GCF_001889165.1_WP_026562601.1	MQNGKVKWFNNEKGFGFIEVEGGDDVFVHFTAIQGEGYKSLEEGQEVSFEIVEGNRGPQAANVTKL	ATGCAGAATGGTAAAGTTAAATGGTTTAACAATGAAAAAGGTTTCGGTTTCATCGAAGTTGAAGGTGGAGACGATGTATTCGTACATTTCACAGCTATCCAAGGTGAGGGGTATAAATCTTTAGAAGAAGGTCAAGAAGTTTCTTTCGAAATTGTTGAAGGTAACCGTGGACCTCAAGCTGCTAACGTAACAAAGTTATAA
GCF_001889165.1_WP_072579812.1	MQQGTVKWFNAEKGFGFIEVEGGDDVFVHFSAIQGEGFKSLDEGQKVTFDVEQGQRGPQATNVNKA	ATGCAACAAGGTACAGTAAAATGGTTTAACGCAGAAAAAGGTTTCGGATTCATCGAAGTTGAAGGTGGAGACGACGTATTCGTACATTTCTCAGCTATCCAAGGCGAAGGATTTAAATCTTTAGACGAAGGTCAAAAAGTAACTTTCGACGTTGAGCAAGGTCAACGTGGACCTCAAGCTACAAACGTAAACAAAGCATAA
GCF_001889165.1_WP_072580509.1	MAQGKVKWFNSEKGFGFIEVEGGDDVFVHFSSIQGEGYKSLEEGQEVSFDIEEGNRGPQAANVQKL	ATGGCACAAGGAAAAGTAAAATGGTTTAATTCAGAAAAAGGTTTTGGATTTATTGAAGTCGAAGGTGGAGATGATGTATTTGTACATTTCTCTTCAATTCAAGGTGAAGGCTATAAAAGCTTAGAAGAAGGTCAAGAAGTTTCTTTTGATATCGAAGAAGGAAACAGAGGGCCACAGGCTGCAAACGTTCAAAAACTATAA
GCF_001902315.1_WP_002507639.1	MKQGTVKWFNAEKGFGFIEVEGENDVFVHFSAINQEGYKSLEEGQSVEFEVVEGDRGPQAANVAKL	ATGAAACAAGGTACAGTAAAATGGTTTAACGCTGAAAAAGGTTTTGGTTTTATCGAAGTTGAAGGAGAAAACGATGTATTCGTACACTTCTCAGCAATTAACCAAGAAGGTTACAAATCATTAGAAGAAGGTCAATCAGTTGAATTTGAAGTAGTTGAAGGCGACCGCGGTCCTCAAGCTGCAAACGTTGCTAAACTATAA
GCF_001902315.1_WP_046836888.1	MNNGTVKWFNAEKGFGFIEVEGGNDVFVHFSAITQDGYKSLEEGQAVEFEIVDGDRGPQAANVVKL	ATGAATAACGGTACAGTTAAATGGTTTAACGCAGAAAAAGGTTTTGGTTTCATCGAAGTTGAAGGTGGAAACGACGTATTCGTTCACTTCTCAGCTATCACTCAAGACGGTTACAAATCATTAGAAGAAGGACAAGCTGTTGAATTCGAAATCGTTGACGGCGATCGCGGTCCTCAAGCAGCAAACGTTGTTAAATTATAA
GCF_001908275.1_WP_017689394.1	MKGTVKWFNAEKGYGFISVEGGEDVFVHFSAIQGDGFKTLEEGQAVEFEITDGNRGPQAANVNKL	TTGAAAGGTACAGTTAAATGGTTTAACGCAGAAAAAGGCTATGGCTTTATTTCAGTTGAAGGCGGCGAGGACGTATTCGTACATTTCTCCGCAATCCAAGGAGATGGCTTCAAAACATTGGAAGAAGGTCAAGCGGTAGAATTCGAAATCACTGATGGAAACCGTGGTCCTCAAGCAGCTAACGTAAACAAACTGTAA
GCF_001908275.1_WP_024631599.1	MQGKVKWFNAEKGYGFIETEDGGDVFVHFSAIQSEGFKTLEEGQSVEFDIVEGARGPQAANVIKL	ATGCAAGGTAAAGTAAAATGGTTCAACGCAGAAAAAGGTTACGGTTTCATTGAGACTGAAGACGGCGGCGACGTATTCGTACATTTCTCCGCAATTCAATCCGAAGGATTCAAAACTTTGGAAGAAGGTCAATCCGTAGAATTCGACATCGTCGAAGGCGCGCGTGGACCGCAAGCAGCTAACGTAATCAAATTATAA
GCF_001922405.1_WP_015899695.1	MNNGTVKWFNAEKGFGFIERENGDDVFVHFSAIQGDGYKTLEEGQSVDFDIVEGDRGEQAANVVKMS	ATGAATAACGGTACAGTTAAATGGTTTAACGCAGAAAAAGGTTTTGGATTTATCGAAAGAGAAAATGGTGACGATGTATTCGTACACTTCTCAGCAATCCAAGGCGACGGCTACAAAACTTTAGAAGAAGGCCAAAGCGTAGACTTCGACATCGTTGAAGGCGATCGTGGTGAACAAGCAGCTAACGTTGTAAAAATGTCATAA
GCF_001922405.1_WP_015900294.1	MKQGTVKWFNAEKGFGFIEVEGENDVFVHFSAINQEGYKSLEEGQAVEFEVVEGDRGPQAANVVKL	ATGAAACAAGGTACAGTTAAATGGTTCAACGCTGAAAAAGGATTCGGTTTTATCGAAGTTGAAGGAGAAAACGACGTATTCGTACACTTCTCAGCAATTAACCAAGAAGGTTACAAATCATTAGAAGAAGGTCAAGCAGTAGAATTTGAAGTAGTTGAAGGCGACCGCGGTCCTCAAGCTGCAAACGTTGTTAAACTATAA
GCF_001932615.1_WP_075269406.1	MEQGTVKWFNADKGYGFISRESGDDVFVHFSAIQSDGFKSLEEGQAVSFEVQQGDRGLQAANVTKL	ATGGAACAAGGAACAGTAAAGTGGTTTAACGCAGACAAGGGTTACGGATTTATCTCACGCGAATCAGGCGACGATGTATTCGTACACTTCTCAGCAATCCAATCTGATGGCTTCAAGTCATTAGAAGAAGGTCAAGCTGTATCATTTGAAGTACAACAAGGTGACCGTGGTTTGCAAGCTGCTAACGTTACAAAGTTGTAA
GCF_001936335.1_WP_054746355.1	MENGTVKWFNAEKGYGFITRQDGSDVFVHFSAIQGDGYKSLEEGQAVSFDIEESDRGPQAVNVNKQ	ATGGAAAACGGCACAGTTAAATGGTTTAACGCAGAAAAAGGCTATGGCTTTATCACTCGTCAAGATGGCAGCGATGTATTCGTACATTTCTCAGCTATCCAAGGTGACGGCTACAAGTCTCTTGAAGAAGGTCAAGCAGTTTCATTCGATATCGAAGAAAGCGATCGCGGACCTCAAGCAGTTAACGTTAACAAACAATAA
GCF_001941825.1_WP_036165387.1	MATGTVKWFNDSKGFGFITPDDGGEDLFAHFSAINMNGFKTLKEGQKVQFEVTQGPKGKQASNIVGA	ATGGCAACAGGTACTGTTAAGTGGTTCAATGATTCCAAAGGTTTTGGCTTCATCACCCCTGATGACGGCGGCGAAGATTTGTTCGCGCACTTCTCCGCAATCAATATGAACGGTTTTAAGACCCTCAAAGAAGGTCAAAAAGTCCAATTCGAAGTCACGCAAGGCCCGAAAGGCAAGCAAGCTTCCAACATCGTCGGCGCGTAA
GCF_001941825.1_WP_036231758.1	MATGIVKWFNDSKGFGFITPDEGGEDLFAHFSAIQTQGFKSLQENQRVSFDVTSGPKGKQASNIQPL	ATGGCAACTGGCATCGTAAAATGGTTCAATGACTCCAAAGGCTTCGGGTTCATCACCCCGGACGAAGGCGGCGAAGACCTGTTCGCGCACTTCTCGGCGATCCAAACTCAAGGCTTCAAGTCGCTGCAAGAGAACCAGCGCGTTTCTTTCGACGTGACCTCTGGTCCGAAAGGCAAACAAGCATCGAACATCCAGCCGCTGTAA
GCF_001951175.1_WP_057867290.1	MEHGTVKWFNAEKGYGFITREDGSDVFVHFSAIQGDGYKTLEEGQAVTFDIEDSDRGPQASNVNKD	ATGGAACACGGAACAGTTAAATGGTTTAACGCAGAAAAAGGCTATGGTTTTATCACTCGCGAAGATGGTAGTGACGTATTCGTTCACTTCTCAGCTATTCAAGGCGACGGTTATAAGACTCTTGAAGAAGGCCAAGCAGTTACTTTCGATATCGAAGATAGCGATCGCGGACCACAAGCTTCAAACGTTAACAAAGACTAA
GCF_001971585.1_WP_025024889.1	MENGTVKWFNADKGFGFITREDGSDVFVHFSAIQGDGFKTLDEGQHVTFDVEDSDRGPQATNVTKN	ATGGAAAACGGAACAGTTAAATGGTTTAATGCAGATAAGGGATTTGGTTTTATTACTCGTGAAGATGGTAGTGACGTATTTGTTCACTTTTCAGCTATCCAAGGCGACGGATTCAAGACATTAGACGAAGGTCAACACGTTACTTTTGATGTAGAAGATAGCGATCGTGGACCACAAGCAACAAACGTTACAAAAAACTAA
GCF_001971585.1_WP_076614625.1	MEHGTVKWFNAEKGYGFITREDGSDVFVHFSAIQGDGYKTLEEGQAVTFDIEDSDRGPQASNVVKN	ATGGAACATGGAACAGTAAAATGGTTTAACGCAGAAAAGGGTTATGGTTTTATTACTCGTGAAGATGGTAGTGATGTATTCGTACATTTCTCAGCCATCCAAGGTGACGGTTATAAGACACTTGAAGAAGGTCAAGCCGTAACATTCGATATCGAAGATAGCGATCGTGGACCACAAGCTTCAAACGTTGTTAAGAACTAA
GCF_001984825.2_WP_002439184.1	MSKIKGNVKWFNESKGFGFITPEDGSKDVFVHFSAIQSNGFKTLAEGQRVEFEITNGAKGPSAANVIAL	ATGTCTAAGATTAAAGGTAACGTTAAGTGGTTTAATGAGTCCAAAGGATTCGGTTTCATTACTCCTGAAGATGGCAGCAAAGACGTGTTCGTACACTTCTCTGCAATCCAGTCTAATGGTTTCAAAACTCTGGCTGAAGGTCAGCGCGTAGAGTTCGAAATCACTAACGGTGCCAAAGGCCCTTCTGCTGCTAACGTAATCGCTCTGTAA
GCF_001984825.2_WP_003860775.1	MSAKMTGLVKWFNADKGFGFITPDDGSKDVFVHFSAIQNDGYKSLDEGQKVSFTIESGAKGPAAGNVVSL	ATGTCTGCTAAAATGACTGGTCTGGTAAAATGGTTCAACGCTGATAAAGGTTTCGGCTTCATCACTCCTGACGATGGCTCAAAAGACGTGTTCGTACACTTCTCTGCTATCCAGAACGATGGCTACAAATCTCTGGACGAAGGTCAGAAAGTGTCCTTCACCATCGAAAGCGGCGCTAAAGGCCCAGCAGCTGGTAACGTTGTAAGCCTGTAA
GCF_001984825.2_WP_008499993.1	MEMGTVKWFNNAKGFGFICPEGGGEDIFAHYSTIQMDGYRTLKAGQSVRFDVHQGPKGNHASLIVPIEAETVA	ATGGAAATGGGTACTGTTAAGTGGTTCAACAACGCCAAAGGGTTTGGCTTCATCTGCCCCGAAGGCGGCGGCGAGGATATCTTCGCTCACTATTCCACCATTCAGATGGATGGTTACAGAACGCTCAAAGCCGGGCAGTCCGTCCGGTTCGATGTACACCAGGGACCTAAAGGCAATCATGCAAGCCTTATCGTCCCCATTGAAGCAGAGACGGTTGCCTAG
GCF_001989575.1_WP_077139844.1	MTQQGTVKWFNADKGFGFIEVEGGDDVFAHFSAIQGEGYKTLEEGQAVEFEIEEGQRGPQAANIVKL	ATGACACAACAAGGTACAGTAAAATGGTTTAACGCAGACAAAGGTTTTGGATTCATCGAAGTTGAAGGTGGAGACGATGTATTCGCTCACTTCTCAGCAATTCAAGGTGAAGGTTACAAAACTTTAGAAGAAGGACAAGCTGTTGAATTCGAAATCGAAGAAGGCCAACGTGGACCTCAAGCAGCTAACATCGTTAAATTATAA
GCF_001989575.1_WP_077140292.1	MKQGTVKWFNAEKGFGFIEIEGENDVFVHFSAINQEGYKSLEEGQSVEFEVVDGDRGPQAANVVKL	ATGAAACAAGGTACAGTTAAATGGTTTAACGCAGAAAAAGGTTTTGGATTTATTGAAATCGAAGGGGAAAACGATGTATTCGTTCATTTCTCAGCAATTAACCAAGAAGGTTACAAGTCATTAGAAGAAGGCCAAAGTGTAGAATTTGAAGTTGTTGACGGCGATCGCGGACCTCAAGCTGCAAACGTTGTTAAACTTTAA
GCF_001995825.2_WP_017055029.1	MATGTVKWFNNAKGFGFICPEGEDGDIFAHYSTIQMEGYRTLKAGQQVDYEVESGPKGSHASSVVPVEGNASK	ATGGCTACAGGTACAGTAAAATGGTTTAACAACGCCAAAGGGTTTGGTTTTATTTGTCCAGAAGGTGAAGACGGCGATATTTTCGCGCACTACTCCACAATACAAATGGAAGGTTATCGAACCTTAAAGGCTGGTCAGCAGGTCGACTATGAAGTAGAAAGTGGACCTAAAGGATCGCATGCTAGCTCTGTTGTTCCTGTAGAAGGTAACGCCAGTAAATAG
GCF_001999225.1_WP_077537728.1	MACGKVKWFNNAKGFGFIVEDGCENDIFAHYSTIVMDGYKTLKAGQDVTFELEQGPKGLHATNIAPDGDIIV	ATGGCTTGCGGTAAAGTTAAATGGTTTAACAACGCTAAAGGTTTTGGTTTCATCGTAGAAGACGGCTGTGAGAATGATATTTTCGCCCATTATTCAACAATTGTAATGGACGGTTATAAAACACTTAAAGCTGGTCAAGATGTAACTTTCGAATTAGAACAAGGCCCTAAGGGCTTACACGCTACCAATATTGCCCCTGATGGCGACATTATTGTGTAA
GCF_001999905.1_WP_077589397.1	MKEGTVKWFNSEKGFGFIEVEGEDDVFVHFSAIQSEGFKTLEEGQRVEFEVVEGNRGPQAANVVKL	GTGAAAGAAGGAACAGTTAAGTGGTTCAACTCAGAAAAAGGTTTTGGATTCATCGAAGTTGAAGGCGAGGACGATGTATTCGTACACTTCTCAGCTATCCAGAGCGAAGGATTCAAAACACTTGAAGAAGGCCAGCGCGTAGAGTTCGAAGTTGTCGAAGGCAACCGCGGACCACAGGCAGCTAACGTAGTTAAGCTGTAA
GCF_002005145.1_WP_179946717.1	MLQGKVKWFNANKGYGFIEAESGTDVFVHYSAIQSDGYRTLEEGQPVEFDVVEGNRGPQAANVNKL	ATATTGCAAGGAAAGGTTAAATGGTTTAATGCCAATAAAGGCTACGGTTTCATAGAAGCCGAGTCTGGCACAGATGTATTTGTCCATTACTCAGCAATCCAATCCGATGGCTACCGCACCTTAGAGGAAGGTCAACCGGTTGAGTTTGATGTAGTAGAGGGAAATCGTGGCCCCCAGGCCGCTAATGTGAATAAGTTATAA
GCF_002005305.1_WP_005497134.1	MSNSTTGLVKWFNEEKGFGFITQDNGGADVFVHFRSITSDGFKTLAEGQKVSFEVEQGQKGLQAANVVAL	ATGTCTAATTCAACAACTGGTCTAGTAAAGTGGTTTAACGAAGAGAAAGGTTTTGGTTTCATTACTCAAGACAATGGCGGCGCTGACGTATTCGTTCACTTCCGTTCAATCACTTCTGACGGCTTCAAGACTCTAGCTGAAGGCCAGAAAGTATCTTTCGAAGTAGAGCAAGGTCAAAAAGGCCTTCAAGCAGCAAACGTAGTTGCGCTGTAA
GCF_002005305.1_WP_077751076.1	MANGTVKWFNNAKGFGFICPDAGGEDVFAHYSTIEMEGYRTLKAGQPVQFEVEAGPKGMHASVISPTN	ATGGCAAACGGAACTGTTAAATGGTTCAACAACGCCAAAGGATTCGGGTTTATTTGCCCTGATGCTGGCGGTGAAGATGTTTTTGCACACTATTCTACCATTGAAATGGAAGGCTATCGAACTCTAAAAGCAGGCCAACCAGTTCAATTTGAAGTAGAAGCGGGTCCAAAAGGTATGCACGCGTCAGTAATATCGCCAACTAATTAA
GCF_002005305.1_WP_077754431.1	MMKGTVKWFNNTKGFGFICPGAGGEDVFAHYSAIQMEGYRTLAAGQTVEYMVEAGPKGMHALAITPTGEISLN	ATGATGAAAGGAACGGTTAAGTGGTTTAATAACACCAAAGGTTTTGGATTTATCTGTCCAGGTGCCGGTGGTGAAGATGTTTTTGCCCACTATTCTGCCATACAGATGGAAGGTTACCGGACTCTTGCGGCGGGTCAAACCGTCGAATATATGGTTGAAGCTGGTCCTAAAGGCATGCACGCATTGGCCATAACACCAACAGGTGAAATTTCATTAAATTAG
GCF_002009235.1_WP_058385256.1	MQEGTVKWFNSEKGFGFIEVEGGDDVFVHFSAIQGDGFKTLDEGQRVEFEVEEGNRGPQATNVTKA	ATGCAAGAAGGAACAGTAAAATGGTTTAACTCAGAAAAAGGCTTTGGTTTTATCGAAGTTGAAGGCGGAGACGATGTATTCGTACATTTCTCGGCAATTCAAGGTGACGGCTTTAAAACGCTTGACGAAGGGCAACGTGTTGAATTCGAAGTAGAAGAAGGCAACCGTGGACCACAAGCGACAAACGTAACTAAAGCATAA
GCF_002021755.1_WP_005437446.1	MATGTVKWFNNAKGFGFICSDEEEGDIFAHYSTIQMDGYRTLKAGQQVSYEVEKGPKGSHASSVVPVEGQAK	ATGGCTACAGGTACAGTAAAGTGGTTTAACAATGCCAAAGGATTTGGGTTTATCTGTTCAGATGAAGAAGAAGGAGATATTTTCGCCCACTACTCAACTATCCAAATGGACGGTTATCGTACACTGAAAGCAGGCCAACAAGTCTCATACGAGGTTGAAAAAGGTCCAAAAGGTTCACACGCAAGTAGCGTCGTGCCAGTAGAAGGCCAAGCCAAATAA
GCF_002025725.1_WP_050468323.1	MATGTVKWFNDAKGFGFITPDEGGEDLFAHFSAIQSNGFKSLKENQRVSFEVTTGPKGKQASNIQPVA	ATGGCAACTGGTACCGTCAAGTGGTTCAATGATGCAAAAGGTTTTGGTTTTATCACCCCCGATGAAGGCGGCGAAGATCTGTTCGCTCACTTCTCGGCTATTCAGTCGAACGGCTTCAAGTCGCTGAAGGAAAACCAACGCGTTTCCTTCGAAGTGACCACTGGCCCGAAGGGCAAGCAAGCTTCGAACATCCAGCCTGTTGCCTAA
GCF_002025725.1_WP_079215849.1	MATGTVKWFNDSKGFGFITPDDGGEDLFAHFSAIQMNGFKTLKEGQKVQFDVTQGPKGKQASNIQQG	ATGGCAACAGGTACTGTTAAGTGGTTCAACGATTCCAAAGGCTTTGGCTTTATCACTCCGGATGACGGCGGTGAGGATTTGTTTGCGCACTTCTCCGCAATCCAGATGAACGGCTTCAAGACCCTGAAAGAAGGTCAAAAAGTCCAGTTTGACGTCACGCAAGGCCCCAAGGGCAAGCAAGCTTCGAACATCCAGCAAGGCTAA
GCF_002056295.1_WP_080050689.1	MENGKVKWFNNAKGYGFIVADGRDEDLFAHYSAIQMDGYKTLKAGQPVRFDIIQGPKGLHAVNIQSVAESANAAPVSKITHEVTATQH	ATGGAAAACGGCAAGGTCAAATGGTTCAACAACGCCAAAGGTTACGGTTTTATTGTGGCCGATGGTCGTGATGAGGACCTGTTCGCGCATTATTCCGCAATCCAGATGGATGGATACAAGACACTAAAGGCTGGGCAGCCGGTTCGTTTCGATATCATTCAAGGCCCCAAGGGTCTGCACGCAGTGAATATCCAGTCCGTAGCTGAATCGGCCAACGCCGCCCCGGTCAGCAAAATCACCCATGAGGTTACCGCCACCCAGCACTAA
GCF_002072065.1_WP_003251474.1	MQRGKVKWFNNEKGYGFIEVEGGSDVFVHFTAIQGEGFKTLEEGQEVSFEIVQGNRGPQAANVVKL	ATGCAACGTGGTAAAGTAAAATGGTTTAACAACGAAAAAGGCTACGGTTTTATCGAAGTGGAAGGCGGTTCGGACGTATTCGTTCACTTCACGGCAATCCAAGGTGAAGGGTTCAAAACGTTAGAAGAAGGCCAAGAAGTTTCGTTTGAAATCGTACAAGGAAACCGCGGACCGCAAGCAGCGAACGTTGTCAAATTATAA
GCF_002074095.1_WP_003153604.1	MQNGKVKWFNNEKGFGFIEVEGGDDVFVHFTAIEGEGYKSLEEGQEVSFEIVEGNRGPQASNVVKL	ATGCAAAACGGTAAAGTAAAATGGTTTAACAATGAAAAAGGCTTCGGCTTCATCGAAGTTGAAGGCGGAGACGATGTATTCGTTCATTTCACTGCAATCGAAGGTGAAGGATACAAATCTCTAGAAGAAGGACAAGAAGTTTCTTTCGAAATTGTTGAAGGTAATCGTGGACCTCAAGCATCTAACGTTGTGAAGCTTTAA
GCF_002074095.1_WP_003155376.1	MLEGKVKWFNSEKGFGFIEVEGQDDVFVHFSAIQGEGFKTLEEGQSVSFEIVEGNRGPQAANVTKA	ATGCTAGAAGGTAAAGTAAAATGGTTTAACTCTGAAAAAGGTTTCGGATTCATCGAAGTTGAAGGACAAGACGATGTATTCGTTCATTTCTCTGCTATTCAAGGCGAAGGCTTCAAAACTTTGGAAGAAGGCCAATCTGTATCTTTCGAAATCGTTGAAGGAAACCGCGGACCACAAGCTGCTAACGTAACAAAAGCGTAA
GCF_002074095.1_WP_003179166.1	MEQGTVKWFNAEKGFGFIERENGDDVFVHFSAIQSDGFKSLDEGQKVTFDVEQGPRGAQAANVQKTA	ATGGAACAAGGTACAGTTAAATGGTTTAATGCAGAAAAAGGTTTTGGATTTATCGAACGTGAAAATGGAGACGATGTATTCGTACACTTTTCTGCAATCCAAAGCGACGGATTCAAATCATTAGACGAAGGTCAAAAAGTAACATTTGACGTTGAGCAAGGTCCTCGCGGAGCTCAAGCTGCTAACGTTCAAAAAACTGCTTAA
GCF_002074155.1_WP_039635055.1	MKTGTVKWFNSEKGFGFLSVEGEEDVFIHFSAIQGEGYKTLEEGDKVQFEVVEGSRGPQAANVVKL	ATGAAAACAGGTACAGTTAAATGGTTTAATTCTGAAAAAGGATTTGGTTTTCTATCAGTTGAAGGTGAGGAAGATGTATTTATTCATTTCTCTGCAATTCAAGGAGAAGGATACAAAACTTTAGAAGAAGGTGACAAAGTACAATTTGAAGTTGTAGAAGGTTCTAGAGGACCTCAAGCAGCTAATGTTGTTAAGTTATAA
GCF_002075795.1_WP_055024439.1	MASGTVKWFNNAKGFGFICPDQGGEDVFAHYSTIEMEGYRTLKAGQPVDFETEQGPKGMHASAISPTK	ATGGCAAGCGGAACTGTTAAATGGTTCAACAACGCCAAAGGATTCGGGTTTATTTGCCCAGATCAGGGTGGCGAAGATGTATTTGCACATTATTCAACAATCGAAATGGAAGGTTATAGAACGCTTAAAGCGGGCCAACCTGTAGATTTCGAAACTGAGCAGGGCCCTAAAGGGATGCATGCTTCAGCCATTTCACCGACTAAATAG
GCF_002076895.1_WP_081153667.1	MAHGTVKWFNNAKGFGFIRPEDGGEDIFAHYSTIQMEGYRTLKAGQDVNYELNAGPKGDHAASITPSELEEESDN	ATGGCTCACGGTACAGTTAAATGGTTTAATAATGCAAAAGGGTTTGGTTTTATTCGTCCAGAGGATGGTGGTGAAGATATTTTTGCTCATTATTCAACAATTCAAATGGAAGGATACCGTACGTTAAAAGCAGGTCAGGATGTAAACTACGAATTAAACGCCGGTCCAAAGGGTGATCACGCAGCAAGTATTACACCATCAGAACTTGAAGAAGAATCAGACAATTAA
GCF_002080475.1_WP_070967781.1	MEKGTVKWFNAEKGYGFISRENGDDVFVHFSAITMDGFKTLEEGQTVEFEIVQGDKGPQATNVTRA	ATGGAAAAAGGTACAGTTAAGTGGTTTAACGCTGAAAAAGGTTATGGATTTATCTCAAGAGAAAACGGTGACGATGTATTCGTACACTTTTCAGCAATTACAATGGATGGATTCAAAACATTAGAAGAAGGTCAAACAGTTGAGTTTGAGATCGTTCAAGGAGATAAAGGACCTCAAGCTACAAACGTAACTAGAGCATAA
GCF_002080475.1_WP_070968477.1	MKTGKVKWFNAEKGFGFIEVEGGDDVFVHFTAITGEGFKTLEEGQSVQFDVVQGNRGPQAENVVKL	ATGAAAACAGGAAAAGTTAAATGGTTTAACGCTGAAAAAGGATTTGGATTTATCGAAGTAGAAGGTGGAGATGACGTATTTGTTCATTTCACTGCAATCACAGGTGAAGGCTTTAAAACTTTAGAAGAAGGTCAAAGTGTTCAATTTGATGTTGTTCAAGGAAACCGTGGACCTCAAGCTGAAAACGTTGTAAAATTATAG
GCF_002081995.1_WP_009766462.1	MEQGKVKWFNAEKGYGFIEREDGDDVFVHFSAIQGDGFKTLEEGQDVSFEIEQGQRGLQATNVTKN	ATGGAACAAGGTAAAGTAAAATGGTTTAACGCAGAAAAAGGTTATGGCTTCATCGAACGTGAAGATGGCGACGACGTATTCGTACACTTCTCAGCTATCCAAGGTGATGGCTTCAAAACTCTTGAAGAAGGTCAAGACGTGTCTTTCGAAATCGAACAAGGACAACGCGGACTTCAAGCAACTAACGTTACTAAAAACTAA
GCF_002081995.1_WP_029053827.1	MKQGTVKWFNSEKGFGFIEVDGEEDIFVHFSAIQGEGFKSLDEGQQVEFEVVEGNRGLQAANVVKI	ATGAAACAAGGTACAGTGAAATGGTTTAACTCAGAAAAGGGCTTCGGTTTTATCGAAGTTGACGGAGAAGAAGACATCTTTGTACACTTCTCAGCAATCCAAGGCGAAGGATTCAAATCTCTTGACGAAGGTCAGCAGGTTGAATTTGAAGTAGTCGAAGGTAACCGTGGTCTACAAGCAGCTAACGTTGTTAAAATCTAA
GCF_002097535.1_WP_035510016.1	MVEGTVKWFNAEKGFGFIEVEGQDDVFVHFSAIQEEGFKSLEEGQVVTFEIEEGQRGPQAANVQK	ATGGTTGAAGGTACAGTAAAATGGTTTAACGCAGAAAAAGGATTTGGATTCATCGAAGTAGAAGGTCAAGACGACGTATTCGTTCACTTCTCCGCGATCCAAGAAGAAGGATTCAAATCTCTTGAAGAAGGTCAAGTTGTAACTTTCGAAATCGAAGAAGGACAACGTGGACCACAAGCTGCTAACGTTCAAAAATAA
GCF_002097535.1_WP_035541471.1	MKTGTVKWFNAEKGFGFIEIEGEDDVFVHFSAINEEGFKSLEEGQSVEFEITEGNRGPQAANVTKL	ATGAAAACAGGTACAGTGAAGTGGTTCAACGCGGAAAAAGGTTTTGGTTTTATTGAGATCGAGGGCGAGGATGATGTATTCGTACACTTCAGCGCAATCAATGAAGAAGGTTTCAAATCTCTTGAAGAAGGTCAATCCGTAGAATTTGAAATCACTGAAGGTAACCGTGGACCACAAGCTGCGAATGTAACTAAACTATAA
GCF_002097535.1_WP_035553249.1	MLQGNVKWFNAEKGFGFIEVEGQDDVFVHFSAIQGEGFKTLEENETVTFEIVEGNRGPQAANVQK	ATGTTACAAGGTAATGTTAAATGGTTTAACGCAGAAAAAGGTTTTGGATTTATCGAAGTAGAAGGTCAAGACGATGTATTCGTACACTTCTCTGCTATTCAAGGCGAAGGATTTAAAACTTTAGAAGAAAACGAAACTGTTACTTTTGAAATCGTTGAAGGTAACCGTGGACCCCAAGCAGCTAACGTTCAAAAATAA
GCF_002097535.1_WP_085029777.1	MQNGTVKWFNAEKGYGFIQVEGGNDVFVHFSAIQEEGFKSLEEGQEVSFEIVEGDRGPQAANVVKQ	ATGCAAAACGGTACAGTAAAATGGTTCAACGCAGAAAAAGGTTATGGCTTCATTCAAGTTGAAGGCGGAAATGACGTTTTCGTTCACTTCTCTGCTATTCAAGAAGAAGGCTTCAAGTCTCTTGAAGAAGGACAAGAAGTATCTTTTGAAATCGTAGAAGGCGACCGTGGCCCTCAAGCGGCTAACGTTGTAAAACAATAA
GCF_002097715.1_WP_004196460.1	MATGIVKWFNDAKGFGFITPDEGGEDLFAHFSAINMQGFKTLKEGQKVSFEVVQGPKGKQASNIQAA	ATGGCAACTGGTATTGTCAAATGGTTCAATGACGCGAAGGGCTTCGGTTTCATCACCCCCGACGAGGGCGGTGAGGATCTGTTCGCACACTTCTCGGCCATCAACATGCAGGGCTTCAAGACCCTGAAGGAAGGCCAGAAGGTGAGCTTCGAGGTCGTCCAAGGACCGAAAGGCAAGCAGGCTTCGAATATCCAGGCCGCCTAA
GCF_002097715.1_WP_084900286.1	MATGTVKWFNDAKGFGFITPEGGGDDLFAHFSEIRTEGFKTLQENQKVEFDVKTGPKGLQASNIKPL	ATGGCAACCGGTACCGTCAAGTGGTTCAATGACGCTAAGGGCTTCGGCTTCATCACCCCGGAAGGCGGCGGCGACGATCTGTTCGCGCACTTCTCGGAAATCCGCACCGAAGGCTTCAAGACGCTGCAAGAAAACCAGAAGGTCGAATTCGATGTGAAGACGGGCCCGAAGGGTCTGCAAGCATCGAACATCAAGCCGCTGTAA
GCF_002101335.1_WP_014613945.1	MKQGTVKWFNAEKGFGFIEVEGENDVFVHFSAINQEGYKSLDEGQSVEFEVVEGDRGPQAANVVKL	ATGAAACAAGGTACAGTAAAATGGTTTAACGCTGAAAAAGGATTTGGTTTTATCGAAGTTGAAGGAGAAAACGACGTATTCGTTCACTTCTCAGCTATCAACCAAGAAGGTTACAAATCATTAGATGAAGGTCAATCAGTTGAATTTGAAGTAGTTGAAGGCGACCGCGGTCCTCAAGCTGCGAACGTTGTTAAACTATAA
GCF_002101395.1_WP_004386688.1	MAKIKGQVKWFNESKGFGFITPADGSKDVFVHFSAIQGNGFKTLAEGQNVEFEIQDGQKGPAAVNVVAI	ATGGCAAAAATTAAAGGTCAGGTTAAGTGGTTCAACGAATCCAAAGGTTTTGGCTTCATTACTCCGGCAGACGGCAGTAAAGATGTGTTCGTTCACTTTTCTGCTATCCAGGGTAATGGTTTCAAAACCCTGGCCGAAGGCCAGAACGTCGAGTTCGAAATTCAGGATGGTCAGAAAGGTCCGGCTGCGGTTAACGTTGTCGCTATCTGA
GCF_002101395.1_WP_038627478.1	MSKIKGNVKWFNESKGFGFITPEDGSKDVFVHFSAIQSNGFKTLAEGQRVEFEITDGAKGPSAANVIAL	ATGTCCAAGATTAAAGGTAACGTTAAGTGGTTTAATGAGTCCAAAGGATTCGGCTTCATTACTCCGGAAGATGGCAGCAAAGACGTATTCGTACACTTCTCTGCTATCCAGAGCAATGGTTTCAAAACCCTGGCCGAAGGTCAGCGCGTTGAGTTTGAAATCACTGACGGCGCAAAAGGCCCATCTGCTGCTAACGTTATCGCTCTGTAA
GCF_002101395.1_WP_085067439.1	MEKGTVKWFNNAKGFGFICPIGGGDDIFAHYSSIQMEGYRTLKAGQQVQFDVHQGPKGNHASLIVPVEAVEGIHA	ATGGAGAAGGGTACAGTTAAATGGTTCAACAATGCCAAAGGATTCGGCTTTATCTGCCCGATCGGCGGCGGCGATGATATCTTTGCCCATTATTCCTCAATCCAGATGGAGGGATACAGGACGCTCAAAGCCGGGCAACAGGTGCAGTTTGACGTTCATCAGGGACCGAAAGGCAATCATGCCAGCCTTATTGTTCCGGTGGAGGCGGTTGAAGGTATCCACGCCTGA
GCF_002101395.1_WP_085067762.1	MSAKLTGLVKWFNAEKGFGFISPADGSKDVFVHFSAIQNQGFKTLEEGQSVEFTIENGPKGPAAANVNVR	ATGTCTGCAAAACTGACTGGTTTAGTAAAATGGTTCAACGCTGAGAAAGGTTTCGGCTTTATTTCTCCGGCTGACGGCAGCAAAGATGTATTCGTGCACTTCTCCGCTATCCAGAACCAGGGTTTCAAAACGCTGGAAGAAGGTCAGAGCGTTGAGTTCACCATTGAAAACGGTCCGAAAGGCCCGGCTGCTGCTAACGTAAACGTACGCTAA
GCF_002101395.1_WP_085069158.1	MSNKMTGLVKWFNAEKGFGFITPQDGSKDVFVHFSAIQSNDFKTLDEGQKVEFSIENGAKGPSATNVVAL	ATGTCTAATAAAATGACTGGTTTAGTAAAATGGTTCAACGCTGAGAAAGGTTTTGGCTTTATCACTCCTCAGGACGGCAGCAAAGATGTATTCGTACATTTCTCTGCTATCCAGAGCAACGATTTCAAAACCTTAGATGAAGGCCAGAAAGTAGAGTTCTCTATCGAGAACGGCGCTAAAGGCCCATCAGCGACCAACGTTGTCGCGCTGTAA
GCF_002101395.1_WP_085071379.1	MSNKMTGLVKWFNAEKGFGFISPEDGSKDVFVHFSAIQSNDFKTLDEGQKVEFSIENGAKGPSATNVVAL	ATGTCTAACAAAATGACTGGTTTAGTAAAATGGTTTAACGCTGAGAAAGGTTTCGGCTTCATTTCTCCGGAAGATGGCAGCAAAGATGTATTCGTACACTTCTCTGCAATCCAGAGCAACGATTTCAAAACCCTTGATGAAGGCCAGAAAGTAGAGTTCTCTATCGAGAACGGTGCTAAAGGTCCGTCAGCAACTAACGTTGTTGCGCTGTAA
GCF_002117105.1_WP_085759978.1	MQTGIVKWFNNAKGFGFILPEGGGADIFAHYSSIDMGGYKTLKAGQAVSYETVNGPKGLHATNIHATDASSDGESTEVTDAATENQLTAD	ATGCAAACTGGAATAGTGAAGTGGTTCAACAACGCTAAAGGCTTTGGTTTTATCCTTCCTGAAGGTGGTGGTGCAGATATCTTTGCTCATTACTCTTCTATTGATATGGGTGGATATAAAACCTTAAAAGCTGGTCAAGCTGTATCTTATGAGACCGTGAACGGCCCCAAAGGCCTTCATGCGACCAATATACATGCTACCGATGCTTCTAGCGATGGTGAATCTACTGAAGTTACCGATGCTGCAACAGAAAATCAGTTAACGGCTGATTAA
GCF_002127965.1_WP_005881867.1	MATGTVKWFNDSKGFGFITPEDGGEDLFAHFSAINMNGFKTLKEGQKVQFEVTQGPKGKQASNIQSV	ATGGCAACTGGTACAGTCAAGTGGTTTAACGATTCTAAAGGTTTCGGTTTTATTACCCCGGAAGACGGTGGTGAAGATTTGTTCGCACACTTCTCCGCAATTAACATGAATGGCTTCAAAACCTTGAAAGAAGGACAAAAGGTTCAATTTGAAGTCACTCAGGGCCCAAAAGGCAAACAGGCTTCCAACATTCAATCCGTATAA
GCF_002157225.2_WP_086932349.1	MSRGTVKWFNNAKGFGFILPEDGGDDLFAHYSSIEMDGYRTLKAGQSVTFEIEEGDKGLHANHIKPEQAEKNSNPDNNQAETSELA	ATGTCCAGGGGAACAGTTAAGTGGTTCAACAATGCCAAAGGATTTGGGTTTATTTTACCTGAAGATGGTGGCGATGACTTGTTTGCTCACTACTCATCCATTGAAATGGATGGCTATAGAACACTCAAGGCAGGTCAGAGTGTAACATTTGAAATAGAGGAAGGTGACAAAGGGCTTCATGCCAATCATATAAAACCTGAGCAAGCCGAAAAAAACTCGAACCCCGATAATAATCAGGCTGAAACTAGCGAGTTAGCCTAG
GCF_002157735.2_WP_017025474.1	MSKTTGTVKWFNEEKGFGFITQENGGADVFVHFRAITGEGFRTLAEGQKVAFEVEQGQKGPQAANVEVL	ATGTCTAAGACAACTGGTACAGTTAAGTGGTTTAACGAAGAGAAAGGTTTCGGTTTCATCACTCAAGAGAATGGCGGCGCAGACGTATTTGTTCACTTCCGTGCTATCACAGGTGAAGGTTTCCGCACTCTAGCTGAAGGCCAAAAAGTAGCGTTTGAAGTTGAGCAAGGTCAAAAAGGCCCTCAAGCTGCAAACGTTGAAGTACTATAA
GCF_002157735.2_WP_086980863.1	MSKTTGIVKWFNEEKGFGFITQDNGGADVFVHFRAIASEGFKTLKEGQKVSFEVEQGQKGLQAANVVPA	ATGTCTAAAACAACTGGTATCGTTAAATGGTTTAACGAAGAAAAAGGTTTCGGCTTCATTACTCAAGACAACGGTGGTGCTGATGTATTCGTACATTTCCGTGCAATCGCTTCTGAAGGTTTCAAAACTTTGAAAGAAGGCCAAAAAGTTTCTTTCGAAGTAGAACAAGGCCAAAAAGGTCTTCAAGCTGCGAACGTTGTTCCTGCTTAA
GCF_002157735.2_WP_086983976.1	MATGTVKWFNNAKGFGFICPEGEEGDIFAHYSTIQMDGYRTLKAGQQVSYEVEKGPKGSHASLVMPLDNDQSK	ATGGCTACAGGAACAGTTAAATGGTTTAACAATGCCAAAGGATTTGGCTTCATTTGTCCAGAGGGTGAAGAAGGAGATATTTTTGCACACTATTCGACAATTCAAATGGATGGATACCGGACGTTAAAAGCAGGCCAACAAGTCTCCTATGAAGTAGAAAAAGGTCCTAAAGGCTCTCATGCAAGCCTCGTTATGCCACTTGATAACGATCAAAGTAAATAG
GCF_002157875.1_WP_086963498.1	MTTGTVKWFNNAKGFGFICPDDGGEDIFAHFSTIEMDGYRTLKAGQLVQYKIEQGPKGNHATSIRAAGE	ATGACAACCGGTACGGTGAAGTGGTTTAATAACGCAAAGGGATTTGGTTTTATCTGCCCAGATGATGGTGGCGAAGATATTTTCGCTCACTTTTCTACGATTGAAATGGACGGGTATAGAACCCTAAAAGCAGGCCAGTTGGTACAATATAAAATTGAACAAGGCCCCAAAGGTAATCATGCCACTAGCATTAGAGCCGCGGGCGAATAA
GCF_002157895.1_WP_087038118.1	MTTGTVKWFNNAKGFGFICPQDGGDDVFAHFSTIEMDGYRTLKAGQLVQYKIEQGPKGNHAVSIRSAGE	ATGACAACCGGTACGGTGAAGTGGTTTAATAATGCTAAGGGATTTGGCTTTATCTGCCCACAGGACGGCGGTGATGATGTGTTCGCACATTTCTCCACCATTGAGATGGATGGATATAGAACCCTCAAAGCGGGCCAGTTGGTACAATATAAAATTGAACAAGGCCCAAAAGGAAATCATGCAGTTAGCATTAGATCTGCGGGCGAATAA
GCF_002162355.1_WP_087455304.1	MHQGTVKWFNAEKGYGFITVEGGDDVFVHFSAIQEDGFKTLEEGQRVSFEIVEGNRGPQASNVSKA	ATGCATCAAGGTACTGTTAAGTGGTTTAACGCAGAAAAAGGTTACGGCTTCATCACTGTTGAAGGCGGCGACGATGTGTTCGTACACTTCTCCGCAATCCAGGAAGATGGCTTCAAGACTCTTGAAGAAGGCCAACGCGTTTCTTTCGAAATCGTAGAAGGCAACCGCGGTCCGCAAGCATCTAACGTTTCCAAGGCATAA
GCF_002162355.1_WP_087456860.1	MQTGTVKWFNADKGFGFIEVEGGSDVFVHFSAIQGDGFKTLDEGQRVQFNVVEGNRGPQAENVVKL	ATGCAAACAGGTACTGTAAAATGGTTCAACGCTGACAAAGGTTTCGGTTTCATCGAAGTTGAAGGCGGTTCCGACGTGTTCGTACACTTCTCCGCTATCCAAGGCGACGGTTTCAAAACCCTCGACGAAGGCCAACGCGTACAATTCAACGTTGTTGAAGGCAACCGCGGCCCGCAAGCTGAGAACGTTGTAAAGCTGTAA
GCF_002162355.1_WP_087458429.1	MQGKVKWFNAEKGYGFIEREDGDDVFVHFSAIQTDGFKTLEEGQSVSFDIVEGARGPQAANVTKL	ATGCAAGGTAAAGTGAAATGGTTCAACGCTGAAAAAGGTTACGGTTTCATCGAGCGCGAAGACGGTGACGACGTATTTGTTCATTTCTCCGCGATCCAAACCGATGGCTTCAAAACCCTCGAAGAAGGTCAATCCGTTTCCTTCGACATCGTGGAAGGCGCTCGCGGTCCGCAAGCAGCAAACGTAACGAAGCTGTAA
GCF_002162375.1_WP_087459365.1	MSNKVTGTVKWFNESKGFGFIEQQSGPDVFAHFSAIQSDGFKTLAEGQKVEFTVTQGQKGPQAENIVAI	ATGTCTAACAAAGTTACAGGCACCGTTAAATGGTTCAACGAATCTAAAGGTTTTGGTTTTATCGAACAACAATCAGGACCAGACGTTTTCGCACACTTCAGTGCAATCCAAAGCGACGGTTTCAAAACTTTGGCAGAAGGCCAGAAAGTTGAGTTCACTGTAACTCAAGGTCAAAAAGGCCCACAAGCAGAAAATATCGTAGCGATCTAA
GCF_002162375.1_WP_087463036.1	MSNTVTGTVKWFNESKGFGFISQENGPDVFAHFSAITGTGFKTLAEGQKVEFTITQGQKGPQAENIVAL	ATGTCTAATACAGTAACTGGCACCGTTAAGTGGTTTAACGAGAGCAAAGGTTTTGGTTTTATTTCACAGGAAAATGGACCAGACGTTTTCGCTCACTTCAGTGCAATCACCGGTACTGGTTTTAAAACTTTGGCCGAAGGTCAAAAAGTTGAGTTCACAATTACTCAAGGCCAAAAAGGTCCTCAAGCTGAGAATATCGTTGCTCTGTAA
GCF_002163605.1_WP_001062678.1	MAKIKGQVKWFNESKGFGFITPADGSKDVFVHFSAIQGNGFKTLAEGQNVEFEIQDGQKGPAAVNVTAI	ATGGCAAAGATTAAAGGTCAGGTTAAGTGGTTCAACGAGTCTAAAGGTTTTGGTTTCATTACTCCTGCTGACGGCAGCAAAGATGTATTCGTACACTTCTCTGCAATCCAGGGTAACGGCTTCAAAACTCTGGCTGAAGGCCAGAACGTAGAGTTCGAAATTCAGGACGGTCAGAAAGGACCAGCAGCGGTTAACGTAACTGCTATCTGA
GCF_002163605.1_WP_038019505.1	MSKIKGNVKWFNESKGFGFITPEDGSKDVFVHFSAIVSNGFKTLAEGQRVEFEITDGAKGPSAANVISL	ATGTCCAAGATTAAAGGTAACGTTAAGTGGTTTAATGAATCTAAAGGATTCGGTTTCATTACTCCTGAAGATGGCAGCAAAGATGTATTCGTACACTTCTCTGCAATCGTGAGCAATGGCTTCAAAACTCTGGCTGAAGGTCAGCGTGTAGAGTTTGAAATTACTGACGGTGCCAAAGGCCCATCTGCTGCTAACGTTATCAGCCTGTAA
GCF_002163605.1_WP_087487864.1	METGFVKWFNNAKGFGFICPDTGGEDIFAHYSTIQMEGYKTLKAGQKVNFNASEGAKGNQASLIIPVNDAGINLS	ATGGAAACGGGTTTTGTAAAATGGTTTAACAATGCCAAAGGATTTGGTTTTATTTGTCCGGACACAGGAGGTGAAGATATTTTTGCACATTACTCCACCATTCAGATGGAAGGATATAAAACACTTAAAGCTGGCCAGAAAGTTAATTTTAACGCCAGCGAAGGCGCCAAAGGCAACCAGGCAAGTCTGATTATTCCTGTCAATGACGCTGGAATTAATCTGTCATAA
GCF_002192415.1_WP_019914582.1	MQTGTVKWFNAEKGFGFIEVEGGSDVFVHFSAITGDGFKTLDEGQRVEFNVVQGNRGPQAENVVKL	ATGCAAACAGGTACAGTTAAATGGTTCAACGCAGAAAAAGGATTCGGTTTCATCGAAGTTGAAGGCGGAAGCGACGTATTCGTTCACTTCAGCGCAATCACTGGCGACGGCTTCAAAACTTTGGACGAAGGCCAACGCGTTGAATTCAACGTTGTTCAAGGCAACCGCGGACCACAAGCCGAAAACGTTGTAAAACTGTAA
GCF_002192415.1_WP_019914790.1	MQTGTVKWFNADKGFGFIEVEGGSDVFVHFSAITGDGFKSLDEGQRVEFNVTQGARGPQAENVVKL	ATGCAAACAGGAACAGTAAAATGGTTTAACGCAGACAAAGGATTTGGTTTTATCGAAGTTGAAGGCGGAAGCGACGTATTCGTACACTTCTCCGCAATCACTGGCGACGGCTTCAAATCTTTGGACGAAGGCCAACGCGTTGAGTTCAACGTAACTCAAGGCGCTCGTGGACCACAGGCTGAAAACGTTGTAAAACTGTAA
GCF_002192415.1_WP_019915069.1	MEGKVKWFNAEKGYGFIETADGGDVFVHFSAIQTDGFKTLDEGQSVEFDIVEGARGPQAANVIKL	ATGGAAGGTAAAGTAAAATGGTTTAACGCAGAAAAAGGTTATGGATTTATCGAAACTGCCGATGGTGGCGATGTATTCGTACATTTCTCCGCAATTCAAACAGACGGTTTCAAGACGTTGGATGAAGGACAATCCGTTGAGTTTGATATCGTTGAAGGTGCACGCGGACCACAAGCAGCTAACGTAATCAAATTATAA
GCF_002192415.1_WP_087914664.1	MKGTVKWFNAEKGYGFLQVEGGEDVFVHFSAIQGEGFKTLDEGQAVEFDVTEGNRGPQAANVVKL	TTGAAAGGTACAGTGAAATGGTTTAATGCAGAGAAAGGCTACGGTTTTCTTCAGGTTGAAGGCGGCGAGGATGTATTTGTACACTTCTCAGCAATTCAAGGTGAAGGATTCAAGACTTTGGATGAAGGCCAGGCCGTAGAATTTGATGTGACTGAAGGTAACCGTGGACCCCAGGCAGCTAACGTAGTTAAATTATAA
GCF_002196515.1_WP_021019029.1	MATGKVKWFNNAKGFGFICSEEGEGDIFAHYSTIQMDGYRTLKAGQHVSYEIEQGPKGFHASAVVPIEAQQAK	ATGGCTACCGGTAAAGTAAAATGGTTCAATAACGCCAAGGGATTTGGTTTTATCTGCTCTGAGGAAGGAGAAGGTGACATTTTTGCTCACTACTCAACGATCCAAATGGATGGATATCGTACCCTAAAAGCAGGTCAACATGTTTCATATGAGATTGAACAAGGACCAAAAGGCTTCCACGCTAGCGCCGTTGTACCAATCGAGGCTCAACAAGCCAAGTAA
GCF_002197645.1_WP_010760878.1	METGTVKWFNSDKGFGFITAENGNDVFVHFSAIQGDGFKTLEEGQAVTFDVEEGQRGPQATNVNKA	ATGGAAACAGGTACAGTAAAATGGTTTAACTCAGACAAAGGTTTTGGATTTATCACTGCAGAAAACGGTAACGATGTATTCGTACATTTCTCAGCTATCCAAGGCGACGGATTCAAAACTTTAGAAGAAGGTCAAGCAGTGACTTTCGACGTAGAAGAAGGCCAACGTGGACCTCAAGCTACTAACGTTAACAAAGCATAA
GCF_002197645.1_WP_069636133.1	MEQGTVKWFNAEKGFGFISREDGSDVFVHFSAIQGDGFKTLEEGQSVSFDVEDSDRGPQAVNVEKN	ATGGAACAAGGAACAGTAAAATGGTTTAATGCAGAAAAAGGGTTTGGATTTATCTCTCGCGAAGACGGAAGCGACGTATTCGTACACTTCTCAGCTATCCAAGGAGACGGATTCAAAACTTTAGAAGAAGGTCAATCAGTAAGCTTCGATGTTGAAGATTCAGATCGTGGACCTCAAGCAGTTAACGTAGAAAAAAACTAA
GCF_002204915.1_WP_011080595.1	MSGKMTGTVKWFNETKGFGFISQDNGGKDVFVHFRAIVSEGFKTLAEGQKVSFNVEEGQKGPQASNVTVI	ATGTCTGGTAAAATGACTGGTACAGTAAAATGGTTCAACGAGACTAAAGGTTTTGGTTTTATTTCTCAAGACAACGGCGGCAAAGATGTATTCGTACATTTCCGTGCTATCGTTTCTGAAGGCTTCAAAACTCTTGCTGAAGGTCAGAAAGTAAGCTTCAACGTTGAAGAAGGTCAAAAAGGCCCACAAGCTTCTAACGTTACAGTTATCTAA
GCF_002204915.1_WP_011081453.1	MSNKVTGSVKWFNETKGFGFISQDNGGNDVFVHFNSIVSTGFKTLAEGQRVTFEVEQGKKGPQAANVTAL	ATGTCTAATAAAGTAACTGGTTCAGTAAAATGGTTTAACGAAACGAAAGGTTTCGGTTTTATTTCTCAAGACAACGGTGGTAACGATGTGTTTGTTCACTTCAACTCTATCGTTTCAACAGGTTTTAAAACTTTGGCAGAAGGCCAACGCGTAACATTTGAAGTTGAGCAAGGCAAAAAAGGCCCACAAGCTGCAAACGTAACTGCGCTATAA
GCF_002204915.1_WP_013571399.1	MATGTVKWFNNAKGFGFICSDQEEGDIFAHYSTIQMDGYRTLKAGQQVTYEIEKGPKGCHASSVVPLEVQATK	ATGGCTACAGGTACAGTAAAGTGGTTCAATAACGCCAAAGGATTTGGTTTTATCTGTTCAGATCAAGAGGAAGGCGACATCTTCGCCCACTACTCAACGATTCAGATGGACGGTTATCGTACACTGAAAGCGGGCCAACAAGTCACGTATGAGATTGAGAAAGGTCCGAAAGGGTGTCACGCTAGCAGCGTCGTTCCACTCGAAGTACAAGCAACGAAGTAA
GCF_002208805.2_WP_001831260.1	MKQGTVKWFNAEKGFGFIEVEGENDVFVHFSAINQEGYKSLEEGQSVEFEVVEGDRGPQAANVVKL	ATGAAACAAGGTACAGTTAAATGGTTTAACGCTGAAAAAGGTTTTGGTTTTATCGAAGTTGAAGGAGAAAACGACGTATTCGTACACTTCTCAGCTATTAACCAAGAAGGTTACAAATCATTAGAAGAAGGTCAATCAGTTGAATTTGAAGTAGTTGAAGGCGACCGCGGTCCTCAAGCTGCAAACGTTGTTAAACTATAA
GCF_002209165.2_WP_016912585.1	MKQGTVKWFNAEKGFGFIEIEGENDVFVHFSAINQEGYKSLEEGQAVEFEVVEGDRGPQAANVVKL	ATGAAACAAGGTACAGTTAAATGGTTTAACGCAGAAAAAGGATTTGGCTTCATCGAAATCGAAGGAGAAAATGACGTATTCGTACATTTCTCAGCAATTAACCAAGAAGGTTACAAATCTTTAGAAGAAGGTCAAGCAGTAGAATTCGAAGTAGTTGAAGGCGACCGTGGCCCACAAGCTGCAAACGTTGTAAAACTATAA
GCF_002214395.1_WP_010447207.1	MATGTVKWFNNAKGFGFICSDQEEGDIFAHYSTIQMDGYRTLKAGQQVSYEVEKGPKGSHASSVVPIEDLAK	ATGGCTACAGGTACAGTAAAGTGGTTTAACAATGCCAAAGGATTTGGGTTTATCTGTTCGGATCAAGAAGAGGGAGACATATTCGCCCACTACTCTACTATCCAAATGGACGGTTATCGTACACTGAAAGCAGGCCAACAAGTCTCATACGAGGTTGAAAAAGGTCCAAAAGGTTCACACGCAAGCAGCGTAGTACCAATAGAAGACCTAGCCAAATAG
GCF_002215585.1_WP_011865363.1	MANGTVKWFNNAKGFGFICPEAGGEDVFAHYSTIEMEGYRTLKAGQSVQFEVEQGPKGMHASAISPTK	ATGGCAAACGGAACTGTGAAATGGTTCAACAACGCCAAAGGATTCGGGTTTATCTGCCCTGAAGCTGGTGGTGAAGACGTTTTCGCACACTATTCTACCATTGAAATGGAAGGCTATCGAACTCTAAAAGCAGGCCAATCAGTCCAATTCGAGGTGGAACAGGGGCCTAAAGGGATGCACGCGTCAGCGATATCGCCCACTAAATAG
GCF_002216145.1_WP_089036733.1	MATGTVKWFNDAKGFGFITPDEGGEDLFAHFSAINMEGFKTLKEGQRVSFDVTTGPKGKQAANIQAA	ATGGCAACCGGTACCGTAAAATGGTTTAACGACGCTAAAGGTTTTGGTTTTATCACTCCCGATGAAGGCGGCGAAGACTTGTTCGCACATTTCTCGGCCATCAACATGGAAGGTTTCAAAACCCTGAAAGAAGGCCAACGCGTTTCTTTCGACGTAACCACCGGCCCCAAAGGCAAACAAGCCGCTAATATCCAAGCAGCTTAA
GCF_002216775.1_WP_089060305.1	MNNGTVKWFNADKGFGFIEVEGGDDVFVHFSAIQGEGFKTLEEGQSVTFDVEEGNRGPQATNVVKA	ATGAATAACGGTACAGTAAAATGGTTTAACGCGGACAAAGGTTTCGGTTTCATCGAAGTTGAAGGCGGAGACGACGTATTCGTACACTTCTCAGCAATCCAAGGCGAAGGATTCAAAACTTTAGAAGAAGGTCAATCTGTAACTTTCGACGTTGAAGAAGGTAACCGTGGACCACAAGCTACTAACGTTGTTAAAGCGTAA
GCF_002216775.1_WP_089060577.1	MTGKVKWFNAEKGFGFIEREDGDDVFVHFSAIQAEGFKTLEEGQDVEFEIVEGNRGPQAANVERL	ATGACTGGTAAAGTAAAATGGTTTAATGCAGAAAAAGGCTTTGGTTTTATCGAGCGCGAAGACGGAGACGATGTATTCGTACATTTCTCAGCTATCCAAGCGGAAGGTTTCAAAACACTTGAAGAAGGTCAAGACGTTGAATTCGAAATTGTTGAAGGAAACCGCGGACCTCAAGCAGCTAACGTTGAGCGTCTATAA
GCF_002216775.1_WP_089062637.1	MENGTVKWFNAEKGYGFIQVEDADDVFVHYSAIQEEGFKSLEEGQAVSFEIIEGERGPQAANVVKK	ATGGAGAACGGTACAGTAAAATGGTTTAACGCGGAAAAAGGCTATGGCTTTATTCAGGTTGAGGATGCAGATGATGTATTTGTTCACTATTCTGCGATCCAGGAAGAAGGATTTAAGTCTTTAGAGGAGGGTCAAGCAGTTTCCTTCGAGATTATTGAAGGAGAACGCGGACCACAAGCCGCTAATGTTGTTAAAAAATAA
GCF_002218045.2_WP_017025474.1	MSKTTGTVKWFNEEKGFGFITQENGGADVFVHFRAITGEGFRTLAEGQKVAFEVEQGQKGPQAANVEVL	ATGTCTAAGACAACTGGTACAGTTAAGTGGTTTAACGAAGAGAAAGGTTTCGGTTTCATCACTCAAGAGAATGGCGGCGCAGACGTATTTGTTCACTTCCGTGCTATCACAGGTGAAGGTTTCCGCACTCTAGCTGAAGGCCAAAAAGTAGCGTTTGAAGTTGAGCAAGGTCAAAAAGGCCCTCAAGCTGCAAACGTTGAAGTACTATAA
GCF_002218045.2_WP_017025742.1	MSKTTGIVKWFNEEKGFGFITQDNGGADVFVHFRAIASEGFKTLAEGQKVSFEVEQGQKGLQAANVVPA	ATGTCTAAAACAACTGGTATCGTTAAATGGTTTAACGAAGAAAAAGGTTTCGGCTTCATTACTCAAGACAACGGCGGCGCTGACGTATTCGTACACTTCCGTGCTATCGCTTCTGAAGGTTTCAAAACTCTTGCTGAAGGCCAAAAAGTGTCTTTTGAAGTAGAGCAAGGCCAAAAAGGTCTTCAAGCTGCGAACGTTGTTCCTGCTTAA
GCF_002218045.2_WP_089138652.1	MATGTVKWFNNAKGFGFICPEGEEGDIFAHYSTIQMDGYRTLKAGQQVSYEVEKGPKGSHASLVMPIDSENK	ATGGCTACAGGTACAGTTAAGTGGTTTAACAACGCCAAAGGATTTGGCTTCATTTGTCCTGAAGGAGAAGAAGGTGATATTTTCGCTCACTACTCTACTATTCAGATGGATGGGTACAGAACGTTAAAAGCAGGACAACAAGTATCCTACGAAGTTGAAAAAGGCCCAAAAGGCTCCCATGCTAGTCTAGTCATGCCAATTGATAGTGAAAATAAATAG
GCF_002220285.1_WP_001161731.1	MQGKVKWFNNEKGFGFIEMEGADDVFVHFSAIQGDGYKALEEGQEVSFDITEGNRGPQAANVVKL	ATGCAAGGAAAAGTAAAATGGTTTAACAACGAAAAAGGTTTTGGATTTATCGAAATGGAAGGCGCTGACGATGTATTCGTACATTTCTCTGCTATTCAAGGAGACGGCTACAAAGCTTTAGAAGAAGGTCAAGAAGTATCTTTCGACATTACTGAAGGTAACCGCGGACCTCAAGCTGCTAACGTAGTAAAACTTTAA
GCF_002220285.1_WP_001179150.1	MQNGKVKWFNSEKGFGFIEVEGGEDVFVHFSAIQGEGFKTLEEGQEVTFEVEQGNRGPQATNVNKK	ATGCAAAACGGTAAAGTAAAATGGTTTAACTCAGAAAAAGGTTTCGGTTTCATCGAAGTTGAAGGCGGAGAAGACGTATTCGTTCATTTCTCAGCTATCCAAGGCGAAGGCTTCAAAACTTTAGAAGAAGGTCAAGAAGTTACTTTCGAAGTAGAACAAGGTAACCGTGGACCTCAAGCTACTAACGTAAACAAGAAGTAA
GCF_002220285.1_WP_001193052.1	MQTGKVKWFNGEKGFGFIEVEGGEDVFVHFSAIQGDGFKTLEEGQEVSFEIVEGNRGPQAANVTKN	ATGCAAACAGGTAAAGTTAAATGGTTTAACGGCGAAAAAGGTTTTGGCTTCATCGAAGTTGAAGGCGGAGAAGACGTATTCGTACATTTCTCAGCTATCCAAGGCGACGGCTTCAAAACTTTAGAAGAAGGTCAAGAAGTTTCTTTCGAAATCGTTGAAGGAAACCGCGGACCACAAGCAGCTAACGTTACAAAAAACTAA
GCF_002220285.1_WP_001990088.1	MQGRVKWFNAEKGFGFIEREDGDDVFVHFSAIQQDGYKSLEEGQQVEFDIVDGARGPQAANVVKL	ATGCAAGGAAGAGTGAAATGGTTCAATGCAGAAAAGGGATTTGGGTTTATTGAGCGTGAAGATGGTGACGATGTATTTGTCCATTTTTCTGCTATTCAACAAGATGGGTATAAGTCATTAGAAGAAGGGCAACAAGTAGAGTTTGACATTGTAGATGGAGCACGTGGACCACAAGCAGCTAATGTTGTGAAACTGTAG
GCF_002221505.1_WP_011328402.1	MACGKVKWFNNAKGFGFIVEDGCENDIFAHYSTIVMDGYKTLKAGQDVTFELEQGPKGLHAKNIAPNGDIIE	ATGGCTTGTGGTAAAGTCAAATGGTTCAATAATGCCAAAGGTTTCGGTTTCATCGTAGAAGACGGCTGCGAGAATGATATTTTCGCTCATTACTCAACAATTGTAATGGACGGCTATAAAACACTTAAAGCTGGTCAAGATGTAACATTCGAATTAGAACAAGGCCCTAAAGGCTTACACGCTAAAAATATAGCGCCTAACGGTGATATTATTGAGTGA
GCF_002221525.1_WP_004586755.1	MACGKVKWFNNAKGFGFIVEDGCENDIFAHYSTIVMDGYKTLKAGQDVTFELEQGPKGLHAKNIAPNGDILE	ATGGCTTGTGGTAAAGTCAAATGGTTCAACAACGCCAAAGGTTTTGGTTTCATCGTAGAAGACGGCTGCGAGAATGATATTTTCGCTCATTACTCAACGATTGTAATGGACGGTTATAAGACACTTAAAGCTGGTCAGGATGTAACATTCGAGCTAGAACAAGGCCCTAAGGGTCTTCATGCTAAAAACATTGCCCCTAATGGCGATATTTTAGAGTGA
GCF_002224365.1_WP_089532402.1	MENGTVKWFNAEKGYGFIQVENGDDVFVHYSAIQEEGFKTLEEGQEVSFEIIEGERGPQAANVTKK	ATGGAAAACGGAACAGTAAAGTGGTTTAATGCAGAAAAGGGCTATGGCTTTATCCAGGTTGAAAATGGAGATGATGTTTTTGTCCATTATTCTGCAATTCAAGAAGAAGGATTTAAAACATTAGAAGAAGGCCAAGAGGTTTCATTTGAAATTATTGAAGGTGAACGTGGTCCACAGGCTGCTAATGTAACAAAAAAATAA
GCF_002224365.1_WP_089533783.1	MNNGTVKWFNADKGFGFIEVEGGDDVFVHFSAIQGEGFKTLEEGQAVTFEVEEGNRGPQATNVNKA	ATGAATAACGGTACAGTAAAATGGTTTAACGCAGACAAAGGTTTCGGTTTCATCGAAGTTGAAGGCGGAGACGACGTATTCGTACACTTCTCAGCAATCCAAGGCGAAGGATTCAAAACTTTAGAAGAAGGCCAAGCAGTAACTTTCGAAGTTGAAGAAGGAAACCGCGGACCACAAGCTACTAACGTTAACAAAGCGTAA
GCF_002224365.1_WP_089534146.1	MTGKVKWFNAEKGFGFIEQEDGDDVFVHFSAIQSEGFKTLEEGQDVEFEIVEGNRGPQAANVTTL	ATGACTGGTAAAGTAAAATGGTTTAATGCAGAAAAAGGATTCGGTTTCATCGAACAGGAAGATGGAGACGATGTATTCGTACATTTCTCAGCAATCCAATCAGAAGGTTTCAAGACGCTTGAAGAAGGTCAAGACGTTGAATTTGAAATCGTTGAAGGTAACCGTGGACCACAAGCAGCTAATGTAACTACACTATAA
GCF_002224645.1_WP_089609819.1	MIGKVKWFNAEKGFGFIEREGGSDVFVHFSAIQSEGFKSLDEGQSVEFEIVEGPRGPQAANVIKL	ATGATAGGCAAAGTAAAATGGTTCAACGCAGAAAAAGGATTTGGTTTTATTGAAAGAGAAGGCGGCAGTGACGTTTTTGTTCATTTCTCTGCTATCCAAAGCGAAGGCTTCAAATCCTTGGATGAAGGGCAAAGTGTCGAATTTGAAATCGTTGAAGGACCCCGCGGCCCACAGGCTGCAAATGTAATCAAATTATAA
GCF_002240415.1_WP_007428290.1	MQTGTVKWFNAEKGFGFIEVEGGSDVFVHFSAIQGEGFKSLDEGQRVEFNVVEGNRGPQAENVVKL	ATGCAAACAGGTACAGTTAAATGGTTTAACGCAGAAAAAGGTTTCGGTTTCATCGAAGTTGAAGGTGGAAGCGATGTATTCGTACACTTCTCCGCAATCCAAGGCGAAGGTTTCAAATCTTTGGACGAAGGCCAACGCGTAGAATTCAACGTTGTTGAAGGAAACCGTGGACCACAAGCTGAGAACGTTGTAAAACTGTAA
GCF_002240415.1_WP_007429810.1	MKGTVKWFNAEKGYGFIQVDGGEDVFVHFSAIQGDGFKTLEEGQAVEFEITEGNRGPQAANVIKL	TTGAAAGGTACAGTTAAATGGTTTAACGCAGAAAAAGGTTATGGCTTCATCCAAGTGGATGGTGGCGAGGACGTATTCGTACACTTCTCCGCAATCCAAGGCGACGGCTTCAAAACTTTGGAAGAAGGTCAAGCGGTTGAATTCGAAATTACTGAAGGTAACCGTGGACCACAAGCAGCTAACGTTATCAAACTGTAA
GCF_002243515.1_WP_094237719.1	MQTGTVKWFNADKGFGFIEVEGGSDVFVHFSAITGDGFKTLDEGQKVEFNIVDGARGPQAENVVKL	ATGCAAACAGGTACAGTTAAATGGTTCAACGCTGACAAAGGTTTCGGCTTCATCGAAGTTGAAGGCGGCAGCGACGTATTCGTTCACTTCTCCGCTATCACTGGCGACGGCTTCAAAACTCTCGACGAAGGCCAAAAAGTTGAATTCAACATTGTTGATGGCGCTCGTGGCCCGCAAGCTGAGAACGTTGTAAAGCTGTAA
GCF_002243645.1_WP_028393295.1	MVQGKVKWFNAEKGFGFIEVEGQDDVFVHFSAIQGEGFKTLEEGQEVSFEIEQGARGPQAANVQK	ATGGTACAAGGTAAAGTAAAATGGTTTAACGCAGAAAAAGGTTTCGGTTTCATCGAAGTTGAAGGCCAAGACGATGTATTCGTACATTTCTCAGCTATCCAAGGTGAAGGCTTCAAAACGCTTGAAGAAGGCCAAGAAGTTTCTTTCGAAATCGAGCAAGGCGCTCGTGGACCACAAGCAGCTAACGTTCAAAAATAA
GCF_002243645.1_WP_034307871.1	MEQGKVKWFNAEKGFGFIEREGGDDVFVHFSAIQGEGFKTLEEGQDVTFDVEQGQRGPQASNVNKA	ATGGAACAAGGTAAAGTAAAATGGTTTAACGCAGAAAAAGGTTTTGGATTCATCGAACGTGAAGGTGGAGACGATGTATTCGTACATTTCTCAGCTATCCAAGGCGAAGGTTTCAAAACACTTGAAGAAGGCCAAGACGTTACATTTGATGTAGAACAAGGTCAACGTGGACCACAAGCATCAAACGTAAACAAAGCTTAA
GCF_002243645.1_WP_061462203.1	MTVTGKVKWFNSDKGFGFIEVPNEDDVFVHFSAIQGEGFKSLDEGQEVEFEIEEGNRGPQAKNVVKL	ATGACAGTAACAGGTAAAGTAAAATGGTTCAATAGTGACAAAGGATTTGGATTCATCGAAGTACCAAACGAAGATGATGTTTTCGTTCATTTTTCCGCCATTCAAGGAGAAGGTTTCAAGAGCCTTGATGAAGGTCAAGAGGTTGAATTTGAGATCGAAGAAGGAAACCGCGGACCTCAAGCTAAAAACGTCGTAAAACTCTAA
GCF_002243665.1_WP_003251474.1	MQRGKVKWFNNEKGYGFIEVEGGSDVFVHFTAIQGEGFKTLEEGQEVSFEIVQGNRGPQAANVVKL	ATGCAACGTGGTAAAGTAAAATGGTTTAACAACGAAAAAGGTTATGGTTTCATCGAAGTGGAAGGCGGTTCCGACGTATTCGTTCACTTCACGGCGATCCAAGGTGAAGGGTTCAAAACGTTAGAAGAAGGCCAAGAAGTTTCGTTTGAAATCGTCCAAGGAAACCGCGGACCGCAAGCAGCAAACGTTGTCAAATTATAA
GCF_002250055.1_WP_066412518.1	MLQGKVKWFNAEKGFGFIEVEGQDDVFVHFSAIQGEGFKSLEEGQEVTFEIVEGARGPQAANVQK	ATGTTACAAGGTAAAGTAAAATGGTTTAACGCAGAAAAAGGTTTCGGTTTCATCGAAGTTGAAGGTCAAGACGACGTATTCGTTCACTTCTCTGCTATCCAAGGCGAAGGTTTCAAATCTTTAGAAGAAGGTCAAGAAGTTACTTTCGAAATCGTTGAAGGTGCTCGTGGACCTCAAGCTGCTAACGTTCAAAAATAA
GCF_002250055.1_WP_066415852.1	MLQGTVKWFNSEKGFGFIEREGGDDVFVHFSAIQGEGFKSLEEGQKVTFEIVQGNRGDQAANVTKA	ATGTTACAAGGTACAGTAAAATGGTTTAACTCAGAAAAAGGGTTCGGTTTCATCGAGCGTGAAGGTGGAGACGACGTATTCGTTCATTTCTCAGCTATTCAAGGCGAGGGATTCAAGTCTTTAGAAGAAGGTCAAAAAGTTACATTTGAAATCGTTCAAGGTAACCGTGGAGATCAAGCTGCTAACGTAACTAAAGCATAA
GCF_002250055.1_WP_066418441.1	MQNGKVKWFNNEKGFGFIEVEGGEDVFVHFSAISGDGFKSLEEGQEVSFEIVEGNRGPQAANVVKL	ATGCAAAACGGTAAAGTAAAATGGTTTAACAACGAAAAAGGTTTCGGCTTCATCGAAGTTGAAGGTGGCGAAGATGTATTCGTACATTTCTCTGCTATTTCAGGAGATGGTTTTAAATCTCTAGAAGAAGGTCAAGAAGTTTCTTTTGAAATTGTAGAAGGAAATCGTGGACCTCAAGCTGCTAACGTAGTGAAATTGTAA
GCF_002250945.2_WP_012093819.1	MQGKVKWFNNEKGFGFIEIEGADDVFVHFTAIQGEGYKSLEEGQEVSFDIVEGNRGPQAANVVKL	ATGCAAGGAAAAGTAAAATGGTTTAACAACGAAAAAGGGTTTGGTTTCATCGAAATCGAAGGTGCTGACGATGTATTCGTACACTTCACAGCAATCCAAGGCGAAGGCTACAAATCTTTAGAAGAAGGTCAAGAAGTTTCTTTCGACATCGTTGAAGGTAACCGCGGACCTCAAGCAGCTAACGTAGTAAAACTTTAA
GCF_002250945.2_WP_012094264.1	MTLTGKVKWFNSEKGFGFIEVEDGNDVFVHFSAITGEGFKTLDEGQEVNFEVEEGNRGPQAKNVVKL	ATGACATTAACAGGTAAAGTAAAATGGTTTAACAGCGAAAAAGGTTTCGGTTTCATCGAAGTTGAAGATGGTAACGATGTATTCGTTCATTTCTCAGCTATTACTGGCGAAGGATTTAAAACTCTTGACGAAGGTCAAGAAGTGAACTTCGAAGTTGAAGAAGGCAATCGTGGACCTCAAGCAAAAAACGTTGTAAAGTTATAA
GCF_002250945.2_WP_012094664.1	MQNGKVKWFNAEKGFGFIEVEGGEDVFVHFSAIQGEGFKTLEEGQEVTFEVEQGNRGPQATNVVKK	ATGCAAAACGGTAAAGTAAAATGGTTTAACGCAGAAAAAGGTTTCGGATTCATCGAAGTTGAAGGCGGAGAAGACGTATTCGTTCATTTCTCAGCAATCCAAGGCGAAGGATTCAAAACATTAGAAGAAGGTCAAGAAGTTACTTTCGAAGTTGAACAAGGTAACCGCGGACCACAAGCTACTAACGTAGTTAAGAAGTAA
GCF_002250945.2_WP_012095952.1	MQTGKVKWFNSEKGFGFIEVEGGDDVFVHFSAIQSEGFKTLEEGQEVSFEIVEGNRGPQAANVTKN	ATGCAAACTGGTAAAGTTAAATGGTTTAACAGCGAAAAAGGTTTCGGTTTTATCGAAGTTGAAGGTGGAGACGATGTATTCGTTCACTTCTCAGCGATCCAAAGCGAAGGCTTCAAAACTTTAGAAGAAGGTCAAGAAGTATCTTTCGAAATCGTTGAAGGTAACCGTGGACCACAAGCTGCTAACGTTACAAAAAACTAA
GCF_002250945.2_WP_012096179.1	MQGRVKWFNAEKGFGFIEREDGDDIFVHFSAIQQEGYKTLEEGQNVEFDIVDGARGPQAVNVVKL	ATGCAAGGAAGAGTAAAATGGTTCAATGCAGAAAAAGGATTTGGATTTATTGAACGCGAAGATGGCGATGATATTTTTGTCCATTTTTCTGCAATTCAGCAAGAGGGGTATAAAACATTAGAAGAAGGACAAAATGTGGAATTTGATATTGTAGATGGAGCACGTGGACCGCAAGCGGTGAATGTTGTGAAGTTGTAA
GCF_002257545.1_WP_010317961.1	MSNTTTGTVKWFNETKGFGFISQSNGGPDVFVHFRAIASEGFKTLAEGQKVSFVVEQGAKGPQAANVRAE	ATGTCTAACACTACTACTGGCACTGTAAAATGGTTCAACGAAACTAAAGGTTTTGGTTTCATTTCTCAAAGCAACGGCGGTCCAGATGTATTCGTACACTTCCGCGCTATCGCTTCTGAAGGTTTCAAAACTTTAGCAGAAGGCCAAAAAGTATCTTTTGTTGTAGAACAAGGTGCTAAAGGTCCTCAAGCTGCTAACGTACGTGCTGAATAA
GCF_002257545.1_WP_013857087.1	MATGTVKWFNNAKGFGFICPEGEDTDIFAHYSTIQMEGYRTLKAGQQVSYEIEQGPKGYHASAVVPIEGQLAK	ATGGCTACAGGTACAGTAAAATGGTTTAACAACGCCAAAGGATTTGGGTTTATTTGTCCAGAAGGTGAGGATACCGATATTTTTGCTCACTATTCAACCATTCAAATGGAAGGCTACCGCACACTCAAAGCGGGCCAACAAGTTTCCTATGAGATTGAACAGGGGCCGAAAGGTTATCACGCTAGCGCTGTTGTTCCAATCGAAGGTCAACTTGCAAAATAA
GCF_002277935.1_WP_005875700.1	MENGTVKWFNAEKGFGFISREDGSDVFVHFSAIQGDGFKTLEEGQAVTFDVEESDRGPQATNVEKA	ATGGAAAACGGAACAGTTAAATGGTTCAACGCTGAAAAAGGATTTGGTTTTATTTCACGTGAAGACGGAAGTGACGTATTTGTTCACTTTTCAGCTATCCAAGGTGACGGATTCAAAACTTTAGAAGAAGGTCAAGCAGTAACTTTCGATGTTGAAGAATCAGATCGTGGCCCACAAGCTACGAATGTTGAAAAAGCATAA
GCF_002277935.1_WP_005878127.1	MNNGTVKWFNADKGFGFITAEDGNDVFAHFSAIQGDGFKTLDEGQAVTFDIEDGQRGPQAVNIVKA	ATGAATAACGGTACAGTAAAATGGTTTAATGCAGATAAAGGTTTTGGTTTCATCACAGCTGAAGACGGAAATGATGTTTTTGCACATTTCTCAGCTATCCAAGGTGACGGATTCAAAACATTAGACGAAGGTCAAGCAGTGACTTTTGATATTGAAGACGGTCAACGTGGCCCTCAAGCAGTTAACATCGTTAAAGCTTAA
GCF_002278015.2_WP_010718724.1	MENGTVKWFNAEKGFGFISREDGSDVFVHFSAIQGDGFKTLEEGQAVTFDVEESDRGPQAANVEKA	ATGGAAAACGGAACAGTTAAATGGTTCAACGCTGAAAAAGGATTTGGTTTTATTTCACGTGAAGACGGAAGCGATGTTTTTGTTCACTTTTCAGCTATCCAAGGTGACGGATTCAAAACTTTAGAAGAAGGTCAAGCAGTGACTTTTGATGTTGAAGAATCAGATCGTGGCCCACAAGCTGCTAATGTTGAAAAAGCTTAA
GCF_002278015.2_WP_010719072.1	MNNGTVKWFNADKGFGFITAEDGNDVFAHFSAIQGDGFKTLDEGQAVTFDIEDGQRGPQAVNIVKG	ATGAATAACGGTACAGTAAAATGGTTTAACGCAGACAAAGGTTTTGGATTTATCACTGCTGAAGATGGAAATGATGTTTTTGCACATTTCTCAGCTATCCAAGGTGACGGTTTCAAAACATTAGACGAAGGTCAAGCAGTGACTTTTGATATTGAAGACGGTCAACGTGGCCCTCAAGCAGTAAACATCGTAAAAGGTTAA
GCF_002278075.1_WP_007180251.1	METGTVKWFNDAKGFGFITPDGGGEDLFAHFSEIRTEGFKTLQENQKVTFEVKTGPKGKQAANIKPV	ATGGAAACCGGTACCGTCAAGTGGTTCAATGACGCAAAGGGCTTTGGCTTCATCACGCCGGACGGCGGTGGCGAAGATCTGTTCGCGCATTTCTCGGAAATCCGCACGGAAGGCTTCAAGACGCTGCAAGAAAACCAAAAGGTTACGTTTGAAGTGAAGACGGGCCCGAAGGGCAAGCAAGCTGCTAACATCAAGCCGGTGTAA
GCF_002278075.1_WP_007180614.1	MATGTVKWFNDAKGFGFITPDEGGEDLFAHFSAIQMNGFKTLKEGQKVTFEVVQGPKGKQASNIQAPA	ATGGCAACTGGTACGGTCAAATGGTTCAATGACGCAAAAGGTTTCGGATTCATCACGCCTGACGAAGGCGGCGAGGATCTGTTTGCACACTTCTCGGCCATCCAGATGAATGGGTTCAAGACCCTCAAGGAAGGCCAAAAGGTAACCTTCGAGGTCGTGCAAGGCCCGAAAGGCAAACAGGCATCGAACATCCAGGCACCTGCCTGA
GCF_002288545.1_WP_005967874.1	MSNKMTGLVKWFDAGKGFGFITPDNGSKDVFVHFSAIQSNDFKTLDEGQKVEFTIENGQKGPSAGNVVAL	ATGTCTAATAAAATGACTGGTTTAGTAAAATGGTTTGACGCTGGTAAAGGTTTTGGTTTCATTACTCCTGACAACGGCAGCAAAGATGTATTCGTACATTTCTCTGCTATTCAGAGCAACGATTTCAAAACTCTGGACGAAGGCCAAAAGGTTGAGTTCACTATTGAAAATGGCCAGAAAGGCCCATCAGCTGGCAACGTTGTCGCGCTGTAA
GCF_002288545.1_WP_005968829.1	MAKIKGQVKWFNESKGFGFITPADGSKDVFVHFSAIQGNGFKTLAEGQNVEFEIQDGQKGPSAVNVTAL	ATGGCAAAGATTAAAGGTCAGGTTAAGTGGTTCAACGAGTCTAAAGGCTTTGGTTTCATCACTCCTGCTGACGGCAGCAAAGATGTATTCGTACACTTCTCTGCAATTCAAGGCAACGGCTTCAAAACTCTGGCTGAAGGCCAGAACGTAGAATTCGAAATTCAGGATGGCCAGAAAGGTCCTTCTGCAGTAAACGTCACTGCGCTGTAA
GCF_002288545.1_WP_005976270.1	MSKIKGSVKWFNESKGFGFITPEDGSKDVFVHFSAIQSNGFKTLAEGQRVEFEITDGAKGPSAANVNAI	ATGTCTAAGATTAAAGGTAGTGTTAAGTGGTTCAATGAGTCTAAAGGCTTCGGTTTCATCACTCCTGAAGATGGTAGCAAAGACGTGTTCGTACACTTCTCTGCCATCCAGAGCAATGGTTTCAAAACTCTGGCTGAAGGTCAGCGTGTAGAGTTCGAAATCACTGACGGTGCCAAAGGTCCTTCAGCTGCTAACGTTAACGCTATTTAA
GCF_002288545.1_WP_095699219.1	METGTVKWFNNAKGFGFICPEGGGDDIFAHYSTIQMDGYRTLKAGQVVRFDVHQGPKGNHACLIVPQIAEAVS	ATGGAGACAGGTACTGTTAAATGGTTCAATAATGCCAAAGGGTTTGGTTTTATCTGTCCAGAAGGGGGTGGTGACGATATCTTCGCGCACTACTCAACCATTCAAATGGATGGCTACCGGACGCTGAAAGCCGGGCAGGTTGTCAGGTTTGATGTTCACCAAGGGCCGAAAGGCAATCATGCCTGCCTGATCGTGCCGCAAATCGCCGAGGCCGTATCCTGA
GCF_002290025.1_WP_002288762.1	METGTVKWFNSEKGFGFITAENGNDVFVHFSAIQGDGFKTLEEGQAVTFDVEEGQRGPQATNVTKA	ATGGAAACAGGTACAGTTAAATGGTTTAACTCAGAAAAAGGATTTGGATTTATCACTGCAGAAAACGGAAACGACGTATTCGTTCATTTCTCAGCTATCCAAGGCGACGGATTCAAAACTTTAGAAGAAGGCCAAGCAGTAACTTTTGATGTTGAAGAAGGTCAACGTGGACCTCAAGCAACTAACGTTACTAAAGCTTAA
GCF_002290025.1_WP_067480248.1	MEHGTVKWFNAEKGFGFISREDGSDVFVHFSAIQGDGFKTLEEGQAVTFDVEDSDRGPQATNVEKA	ATGGAACATGGAACAGTTAAATGGTTTAATGCTGAAAAAGGATTTGGCTTCATTTCACGTGAAGACGGAAGCGACGTATTCGTTCACTTCTCAGCAATTCAAGGCGACGGATTCAAAACATTAGAAGAAGGCCAAGCTGTAACTTTTGATGTAGAAGATTCAGATCGTGGACCACAAGCTACAAACGTTGAGAAAGCTTAA
GCF_002290025.1_WP_067480755.1	MEHGTVKWFNNEKGFGFITVDGGDDVFVHFSAIQGDGFKSLEEGQEVEFTIVEGSRGPQAAEVTKL	ATGGAACACGGAACAGTTAAATGGTTCAACAATGAAAAAGGATTTGGGTTTATTACAGTAGATGGCGGAGATGACGTATTCGTACACTTCTCAGCAATTCAAGGAGATGGCTTCAAGAGCTTAGAAGAAGGCCAAGAAGTTGAATTCACAATTGTTGAAGGTTCACGCGGACCTCAAGCTGCTGAAGTGACTAAATTATAA
GCF_002291425.1_WP_002221949.1	MAKIKGQVKWFNESKGFGFITPADGSKDVFVHFSAIQGNGFKTLAEGQNVEFEIQDGQKGPSAVNVTAI	ATGGCAAAGATCAAAGGTCAAGTTAAGTGGTTCAACGAGTCTAAAGGTTTCGGTTTCATCACCCCGGCTGACGGCAGCAAAGATGTGTTCGTACACTTCTCTGCAATCCAGGGTAACGGCTTCAAGACCCTGGCTGAAGGCCAGAACGTTGAGTTCGAAATCCAGGATGGCCAGAAAGGTCCATCTGCAGTTAACGTAACTGCTATCTAA
GCF_002291425.1_WP_004928244.1	MSKKTGQVKWFNESKGFGFIEQHDGGKDVFVHFSAIMTDGFKTLAEGQRVEYTIQDSPRGPAAANVVAL	ATGTCTAAGAAGACGGGTCAGGTTAAGTGGTTCAACGAGAGCAAAGGTTTTGGTTTCATTGAACAGCACGACGGTGGTAAAGATGTGTTTGTACATTTCTCTGCTATCATGACCGACGGTTTCAAAACCCTGGCTGAAGGCCAGCGTGTTGAGTACACCATTCAGGACAGCCCGCGCGGGCCGGCTGCCGCCAACGTTGTTGCCCTGTAA
GCF_002291425.1_WP_004940030.1	MSKIKGSVKWFNESKGFGFITPEDGSKDVFVHFSAIVSNGFKTLAEGQRVEFEITNGAKGPSAANVTAI	ATGTCCAAGATTAAAGGTAGCGTTAAGTGGTTTAATGAATCCAAAGGCTTCGGTTTCATCACCCCTGAAGATGGCAGCAAAGACGTTTTCGTTCATTTCTCCGCCATTGTCAGCAACGGTTTCAAAACCCTTGCCGAAGGCCAGCGTGTAGAGTTTGAAATCACTAACGGCGCCAAAGGCCCGTCTGCTGCCAACGTTACCGCTATCTAA
GCF_002291425.1_WP_095844931.1	MSNLIKGQVKWFNESKGFGFITPADGSKDVFVHFSAIQDQGFKTLAEGQNVQFSIENGAKGPSAANVTAI	ATGTCTAACCTGATCAAAGGTCAAGTGAAGTGGTTCAACGAGTCTAAAGGTTTTGGTTTCATCACGCCTGCAGACGGCAGCAAAGACGTGTTCGTACACTTCTCTGCAATCCAGGATCAAGGCTTTAAAACGCTGGCAGAAGGCCAAAACGTACAGTTCTCTATCGAGAACGGCGCTAAAGGTCCTTCAGCGGCTAACGTTACCGCTATCTAA
GCF_002291425.1_WP_095848039.1	METGTVKWFNNAKGFGFICPEGGGEDIFAHYSTIKMDGYRTLKAGQQVRFDVHQGPKGNHASLIVPLENEAIA	ATGGAGACGGGTACTGTAAAATGGTTCAACAACGCCAAAGGTTTTGGTTTTATCTGCCCCGAAGGGGGCGGCGAAGATATCTTTGCCCATTACTCAACGATTAAGATGGATGGTTACAGGACGTTGAAGGCGGGCCAGCAGGTCCGGTTTGACGTGCACCAAGGGCCCAAAGGAAACCATGCAAGCCTTATCGTGCCACTGGAAAATGAGGCGATTGCCTAA
GCF_002291425.1_WP_095848457.1	MTKITGHVKWFNESKGFGFITPADGSKDVFVHFSAIASDGFKTLAEGQQVEFTIQDSPRGPAAANVVAI	ATGACTAAGATCACTGGTCACGTAAAATGGTTCAACGAAAGCAAAGGCTTCGGCTTTATCACTCCAGCCGATGGTTCCAAGGACGTTTTCGTTCATTTTTCCGCTATCGCTAGCGATGGTTTCAAAACTCTGGCAGAAGGCCAGCAGGTTGAATTCACCATCCAAGACAGCCCACGTGGCCCGGCTGCAGCCAACGTCGTTGCTATCTAA
GCF_002291425.1_WP_095848479.1	MSNKMTGLVKWFDAGKGFGFISPADGSKDVFVHFSAIQSNDFKTLDEGQKVEFSIENGAKGPSAGNVCAI	ATGTCTAATAAAATGACTGGTTTAGTAAAATGGTTTGACGCTGGTAAAGGTTTTGGTTTTATTTCGCCAGCAGATGGCAGTAAAGATGTATTCGTACATTTTTCAGCTATCCAAAGTAATGACTTCAAAACTCTGGATGAAGGGCAAAAAGTGGAATTCTCTATCGAGAATGGCGCAAAAGGCCCTTCTGCCGGCAATGTCTGTGCGATTTAA
GCF_002291445.1_WP_009113827.1	MSKIKGSVKWFNESKGFGFITPEDGSKDVFVHFSAIQSNGFKTLAEGQRVEFEITSGAKGPSAANVIAI	ATGTCTAAGATTAAAGGTAGCGTTAAGTGGTTTAATGAGTCCAAAGGATTCGGTTTCATTACTCCAGAAGATGGTAGCAAAGACGTGTTCGTACATTTCTCTGCCATCCAGAGCAATGGCTTCAAAACTCTGGCTGAAGGTCAGCGTGTAGAGTTTGAAATCACTAGCGGTGCGAAAGGTCCATCTGCTGCTAACGTTATCGCTATTTAA
GCF_002291445.1_WP_009114380.1	MSNKMTGLVKWFDAGKGFGFITPTDGSKDVFVHFSAIQGQGNDYKSLDEGQKVEFSVESGQKGPSAVNVSVI	ATGTCTAATAAAATGACTGGATTGGTAAAATGGTTTGACGCTGGCAAAGGTTTTGGTTTCATTACCCCGACTGACGGCAGCAAAGACGTATTCGTTCACTTCTCTGCCATTCAAGGCCAGGGTAACGATTACAAAAGCTTGGACGAAGGCCAGAAGGTCGAGTTCAGTGTTGAAAGCGGCCAGAAAGGCCCATCAGCAGTGAACGTTAGTGTAATCTAA
GCF_002291445.1_WP_048639002.1	MAKIKGQVKWFNESKGFGFITPADGSKDVFVHFSAIQGNGFKTLAEGQSVEFEIQDGQKGPSAVNVTAL	ATGGCAAAGATTAAAGGTCAGGTTAAGTGGTTCAATGAATCTAAAGGCTTCGGCTTCATCACTCCTGCTGACGGTAGCAAAGACGTATTCGTACACTTCTCTGCAATTCAAGGCAACGGTTTCAAAACGCTGGCTGAAGGCCAGAGCGTAGAGTTCGAAATCCAAGATGGTCAGAAAGGTCCATCTGCAGTCAACGTTACCGCGCTGTAA
GCF_002291445.1_WP_048639230.1	METGTVKWFNNAKGFGFICPEGGGEDIFVHYSTIQMDGYRTLKAGQVVRFDVHQGPKGNHASLIVPLASEETVA	ATGGAGACAGGTACTGTTAAATGGTTCAATAACGCCAAAGGTTTTGGTTTTATCTGTCCTGAAGGGGGCGGTGAAGATATCTTCGTTCACTACTCAACGATTCAAATGGACGGATACCGAACGCTGAAGGCTGGACAGGTTGTCAGGTTTGATGTTCACCAAGGACCGAAGGGGAATCATGCAAGTCTGATCGTGCCACTGGCCAGTGAAGAAACCGTTGCCTGA
GCF_002305855.1_WP_095981472.1	MATGTVKWFNDAKGFGFITQDGGGEDVFCHHSAINMDGFRTLQEGQKVEFEVTRGPKGLQAQNVRAT	ATGGCGACTGGTACCGTGAAGTGGTTCAACGATGCGAAGGGCTTCGGGTTCATCACGCAGGATGGTGGTGGCGAGGACGTGTTCTGCCATCACTCGGCCATCAACATGGACGGCTTCCGTACCCTGCAGGAAGGCCAGAAGGTGGAGTTCGAAGTGACTCGCGGCCCCAAGGGTCTGCAGGCTCAGAACGTCCGCGCGACGTAA
GCF_002310795.1_WP_013464751.1	MACGKVKWFNNAKGFGFIVEDGCENDIFAHYSTIVMDGYKTLKAGQDVTFELQQGPKGLHATNIAPNGDILE	ATGGCTTGTGGTAAAGTCAAATGGTTCAACAACGCCAAAGGTTTTGGTTTCATCGTAGAAGACGGTTGCGAGAACGACATTTTTGCTCATTACTCCACTATTGTAATGGACGGATACAAGACGCTTAAAGCTGGTCAAGATGTTACCTTCGAATTACAACAAGGCCCTAAAGGTCTACACGCTACTAATATAGCCCCTAACGGCGATATTTTAGAGTGA
GCF_002310835.1_WP_013464751.1	MACGKVKWFNNAKGFGFIVEDGCENDIFAHYSTIVMDGYKTLKAGQDVTFELQQGPKGLHATNIAPNGDILE	ATGGCTTGTGGTAAAGTCAAATGGTTCAACAACGCCAAAGGTTTTGGTTTCATCGTAGAAGACGGTTGCGAGAACGACATTTTTGCTCATTACTCCACTATTGTAATGGACGGATACAAGACGCTTAAAGCTGGTCAAGATGTTACCTTCGAATTACAACAAGGCCCTAAAGGTCTACACGCTACTAATATAGCCCCTAACGGCGATATTTTAGAGTGA
GCF_002327085.1_WP_016687461.1	MATGIVKWFNDAKGFGFITPDEGGEDLFAHFSAINMDGFKTLKEGQRVSFEVTTGPKGKQAANIQAA	ATGGCAACCGGTATCGTAAAATGGTTCAACGACGCTAAAGGTTTTGGTTTCATCACTCCGGATGAAGGCGGAGAAGATTTGTTCGCTCACTTCTCTGCGATCAATATGGACGGTTTCAAAACCCTGAAAGAAGGCCAACGCGTGTCTTTCGAAGTAACCACCGGCCCTAAAGGCAAACAAGCCGCTAACATTCAAGCTGCTTAA
GCF_002327145.1_WP_010395943.1	MATGTVKWFNDSKGFGFITPDDGGEDLFAHFSAINMNGFKTLKEGQKVQFEVTQGPKGKQASNIQAA	ATGGCAACAGGTACAGTTAAGTGGTTCAATGATTCCAAAGGTTTTGGCTTCATCACTCCAGATGATGGCGGCGAAGATTTGTTTGCTCATTTCTCCGCAATCAACATGAACGGTTTCAAGACCCTCAAAGAAGGTCAAAAAGTTCAATTCGAAGTCACGCAAGGCCCTAAAGGCAAGCAAGCTTCCAACATCCAAGCAGCCTAA
GCF_002327145.1_WP_010398811.1	MATGIVKWFNDSKGFGFITPDEGGEDLFAHFSAIQSNGFKSLQENQRVSFEVTAGPKGKQASNIQPI	ATGGCAACTGGCATCGTAAAATGGTTCAATGATTCGAAGGGCTTCGGCTTTATTACTCCTGACGAAGGCGGCGAAGATCTGTTCGCTCACTTCTCGGCTATCCAGTCGAACGGCTTCAAGTCCCTGCAAGAGAACCAACGCGTTTCTTTTGAAGTGACCGCTGGCCCTAAAGGCAAGCAAGCTTCGAACATTCAGCCAATCTAA
GCF_002346025.1_WP_004196460.1	MATGIVKWFNDAKGFGFITPDEGGEDLFAHFSAINMQGFKTLKEGQKVSFEVVQGPKGKQASNIQAA	ATGGCAACTGGTATTGTCAAATGGTTCAATGACGCGAAGGGCTTCGGCTTCATCACGCCCGACGAAGGCGGCGAAGATCTGTTTGCACATTTCTCGGCGATCAACATGCAGGGCTTCAAAACCCTGAAGGAAGGCCAAAAGGTCAGCTTCGAGGTAGTGCAAGGCCCGAAGGGCAAGCAAGCGTCGAACATCCAAGCAGCTTGA
GCF_002346025.1_WP_004196837.1	MATGTVKWFNDAKGFGFITPEGGGEDLFAHFSEIRVDGFKTLQENQKVEFEVKTGPKGLQAANIKPL	ATGGCAACCGGTACCGTCAAGTGGTTCAACGACGCCAAGGGTTTTGGTTTCATCACGCCGGAAGGCGGCGGCGAAGATCTCTTCGCGCACTTCTCGGAAATCCGCGTCGACGGCTTCAAGACGCTGCAAGAGAACCAGAAGGTCGAGTTTGAAGTGAAGACCGGCCCGAAGGGTCTGCAGGCAGCGAACATCAAGCCGCTGTAA
GCF_002355375.1_WP_021624313.1	MNTGTVKWFNAEKGFGFIEREDGDDVFVHFSAITGDGFKSLEEGQRVSFDITQGNRGDQAANVSKL	ATGAACACAGGTACAGTAAAATGGTTTAATGCAGAAAAAGGTTTTGGCTTTATTGAAAGAGAAGATGGCGATGATGTATTCGTACATTTCTCTGCGATTACAGGAGATGGATTCAAATCTCTTGAAGAAGGTCAGCGCGTTAGCTTTGATATTACGCAAGGCAACCGTGGAGATCAAGCGGCAAACGTTTCTAAGTTATAA
GCF_002355375.1_WP_096464422.1	MNTGTVKWFNAEKGFGFIEVEGGNDVFVHFSAIQGDGFKSLEEGQSVQFEIVDGNRGPQAANVVKL	ATGAATACAGGTACAGTTAAATGGTTTAATGCTGAAAAAGGTTTTGGATTTATCGAAGTTGAAGGCGGCAACGATGTATTCGTTCACTTCTCTGCTATCCAAGGCGACGGATTCAAATCCCTCGAAGAAGGCCAAAGCGTTCAATTCGAAATCGTTGATGGCAACCGTGGACCGCAAGCTGCTAACGTTGTAAAACTGTAA
GCF_002355375.1_WP_096465689.1	MNTGTVKWFNADKGFGFIEREGGDDVFVHFSAITGEGFKSLEEGQRVSFDIVQGNRGDQAANVTKL	ATGAACACAGGTACAGTAAAATGGTTTAATGCAGACAAAGGTTTCGGTTTCATCGAACGCGAAGGTGGAGATGACGTATTCGTTCATTTCTCAGCGATCACTGGAGAAGGCTTTAAATCTCTTGAAGAAGGCCAACGCGTAAGCTTTGACATCGTTCAAGGCAACCGTGGCGACCAAGCTGCAAACGTTACAAAATTATAA
GCF_002355375.1_WP_096467104.1	MMTGTVKWFNAEKGFGFIEVEGGSDVFVHFSAIQQDGYKSLEEGQTVEFEIVEGARGPQAANVIKL	ATTATGACTGGTACAGTAAAATGGTTTAACGCAGAAAAAGGTTTCGGATTTATCGAGGTAGAAGGTGGAAGCGACGTATTCGTACACTTCTCCGCTATTCAGCAAGATGGGTATAAGTCACTTGAAGAAGGCCAAACTGTTGAATTCGAAATCGTTGAAGGCGCTCGCGGTCCACAGGCTGCTAACGTTATTAAACTGTAA
GCF_002355375.1_WP_220033132.1	MMQGKVKWFNAEKGFGFIERENGDDVFVHFSAIQSEGFKSLEEGQSVEFEIVEGARGPQAANVIKL	CTGATGCAAGGTAAAGTGAAATGGTTTAATGCTGAAAAAGGTTTTGGCTTCATCGAACGTGAAAATGGAGACGATGTATTCGTACATTTCTCTGCGATCCAATCTGAAGGTTTCAAATCGCTGGAAGAAGGCCAAAGCGTTGAGTTCGAAATCGTTGAAGGCGCTCGTGGACCACAAGCAGCGAACGTTATTAAGTTGTAA
GCF_002355475.1_WP_004421865.1	MLSGKVKWFNNAKGYGFILAEGRDEDLFAHYSAIQMDGYKTLKAGQPVSFDIIQGPKGLHAVNIRPVTATSEAPAPISQHQGSTVEV	ATGCTTAGCGGTAAGGTCAAGTGGTTCAACAACGCCAAAGGCTATGGATTCATCCTTGCCGAAGGCCGAGATGAGGACCTGTTCGCCCACTACTCCGCCATCCAGATGGATGGTTACAAGACGCTAAAGGCTGGACAGCCGGTAAGCTTCGATATCATCCAGGGCCCGAAAGGGCTGCATGCCGTGAATATCCGTCCGGTCACGGCGACCAGCGAAGCACCCGCCCCCATCAGCCAACATCAGGGCAGCACGGTTGAAGTTTGA
GCF_002393445.1_WP_001062678.1	MAKIKGQVKWFNESKGFGFITPADGSKDVFVHFSAIQGNGFKTLAEGQNVEFEIQDGQKGPAAVNVTAI	ATGGCAAAGATTAAAGGTCAAGTTAAGTGGTTCAACGAGTCTAAAGGTTTTGGTTTCATTACTCCAGCTGACGGCAGCAAAGATGTATTCGTACACTTCTCTGCAATCCAGGGTAACGGCTTCAAAACTCTGGCTGAAGGCCAGAACGTTGAATTCGAAATCCAGGACGGCCAGAAAGGCCCTGCTGCAGTTAACGTGACTGCCATCTAA
GCF_002393445.1_WP_004100146.1	MSKIKGNVKWFNESKGFGFITPEDGSKDVFVHFSAIQSNGFKTLAEGQRVEFEITNGAKGPSAANVMPI	ATGTCTAAGATTAAAGGTAACGTTAAGTGGTTTAATGAATCCAAAGGCTTCGGCTTCATTACTCCGGAAGATGGCAGCAAAGACGTGTTCGTACACTTCTCTGCAATCCAGAGCAATGGTTTCAAAACCCTGGCTGAAGGCCAGCGCGTTGAGTTTGAAATCACTAACGGTGCCAAAGGCCCTTCTGCTGCAAACGTAATGCCTATCTAA
GCF_002393445.1_WP_008459989.1	MSNKMTGLVKWFNAEKGFGFISPTDGSKDVFVHFSAIQSDSFKTLDEGQKVEFSIENGAKGPAAANVVAL	ATGTCTAACAAAATGACTGGTTTGGTAAAATGGTTCAACGCTGAGAAAGGTTTCGGCTTCATCTCTCCTACCGATGGCAGCAAAGATGTATTCGTACACTTCTCTGCAATCCAGAGCGATAGCTTCAAAACTCTCGACGAAGGCCAGAAAGTTGAGTTCTCTATCGAGAACGGCGCTAAAGGCCCAGCCGCTGCTAACGTTGTTGCGCTGTAA
GCF_002393445.1_WP_008461102.1	METGTVKWFNNAKGFGFICPEGGGEDIFAHYSTIQMDGYRTLKAGQLVRFDVHQGPKGNHASLIVPHEAEAVA	ATGGAGACGGGTACTGTTAAATGGTTCAATAACGCCAAAGGGTTCGGTTTCATTTGCCCGGAAGGCGGCGGCGAAGATATCTTCGCCCACTACTCCACCATTCAAATGGACGGATACAGAACGCTAAAAGCCGGGCAACTTGTCCGGTTTGATGTACATCAGGGACCTAAAGGCAACCATGCCAGCCTGATCGTTCCCCATGAAGCGGAAGCGGTCGCCTAG
GCF_002393505.1_WP_004909801.1	MSDKMKGQVKWFNESKGFGFITPADGSKDVFVHFSAIQGNGFKTLAEGQQVEFTIENGAKGPAAANVTAI	ATGTCCGACAAAATGAAAGGTCAAGTTAAGTGGTTCAACGAGTCTAAAGGCTTCGGTTTCATCACTCCAGCTGATGGTAGCAAAGACGTTTTCGTCCACTTCTCTGCCATTCAGGGCAATGGTTTCAAAACTCTGGCAGAAGGCCAGCAAGTTGAATTCACCATTGAAAACGGTGCAAAAGGCCCAGCAGCTGCTAACGTAACTGCTATCTAA
GCF_002393505.1_WP_006657712.1	MNTGTVKWFNNAKGFGFICPTDGGDDVFAHYSTIQMDGYRTLKAGQKVNYSVGAGPKGSHADVIIPITESGEEKAE	ATGAATACAGGTACGGTGAAGTGGTTCAATAATGCGAAAGGTTTTGGTTTTATCTGCCCAACAGATGGCGGAGATGATGTATTTGCACATTACTCCACAATCCAAATGGACGGTTACCGAACACTGAAAGCGGGCCAGAAGGTTAACTATAGTGTTGGTGCTGGTCCTAAAGGCTCTCATGCTGACGTCATTATCCCAATTACTGAAAGCGGTGAAGAGAAAGCAGAATAA
GCF_002393505.1_WP_006661258.1	MSNTMTGLVKWFNESKGFGFISPADGSKDVFVHFSAIQSDSFKTLNEGQKVSFSVENGAKGPAAANVVAL	ATGTCTAATACAATGACTGGTTTAGTAAAATGGTTTAACGAATCTAAAGGCTTTGGCTTTATTTCTCCTGCTGATGGTAGCAAAGATGTGTTCGTACACTTCTCTGCAATTCAAAGCGACAGCTTCAAAACGCTGAACGAAGGACAAAAAGTTAGCTTCTCAGTAGAGAATGGTGCAAAAGGTCCAGCTGCGGCAAACGTGGTGGCGCTTTAA
GCF_002393505.1_WP_006661913.1	MSNTMTGLVKWFNESKGFGFISPADGSKDVFVHFSAIQSDSFKTLNEGQKVSFSVENGAKGPAAVNVVAL	ATGTCTAATACAATGACTGGTTTAGTAAAATGGTTTAACGAATCTAAAGGCTTTGGCTTTATTTCTCCTGCTGATGGCAGCAAAGATGTGTTCGTACACTTCTCTGCAATTCAAAGCGACAGCTTCAAAACGCTGAACGAAGGACAAAAAGTTAGCTTCTCAGTAGAGAATGGTGCAAAAGGTCCAGCGGCTGTAAACGTCGTAGCTCTTTAA
GCF_002393505.1_WP_006662336.1	MSKVKGNVKWFNESKGFGFITPEDGSKDVFVHFSAISGDGFKTLAEGQKVEFEITEGAKGPSAANVVSL	ATGTCTAAAGTTAAAGGTAACGTTAAGTGGTTCAATGAATCTAAAGGTTTTGGTTTCATCACTCCAGAAGATGGTAGCAAAGATGTTTTTGTTCACTTCTCTGCGATTTCTGGCGACGGTTTCAAAACCTTAGCAGAAGGCCAAAAAGTCGAATTCGAAATCACTGAAGGCGCGAAAGGTCCATCAGCTGCTAACGTTGTCTCTTTGTAA
GCF_002407485.1_WP_094040802.1	MTTGTVKWFNNAKGFGFICPTEGGEDVFAHFSTIQMDGYRTLKAGQVVQYEIQKGPKGNHAVSIVPCG	ATGACAACCGGTACGGTGAAGTGGTTTAACAACGCTAAGGGATTTGGCTTTATCTGTCCGACGGAGGGCGGCGAAGACGTGTTCGCACACTTTTCCACCATCCAGATGGACGGATACAGAACCCTGAAAGCGGGCCAGGTCGTTCAATACGAAATCCAGAAAGGGCCCAAGGGCAACCATGCGGTCAGCATAGTGCCCTGCGGCTGA
GCF_002442935.1_WP_001831260.1	MKQGTVKWFNAEKGFGFIEVEGENDVFVHFSAINQEGYKSLEEGQSVEFEVVEGDRGPQAANVVKL	ATGAAACAAGGTACAGTAAAATGGTTTAACGCTGAAAAAGGATTCGGTTTTATCGAAGTTGAAGGAGAAAACGACGTATTCGTACACTTCTCAGCTATTAACCAAGAGGGTTACAAATCATTAGAAGAAGGTCAATCAGTTGAATTTGAAGTAGTTGAAGGCGACCGCGGTCCTCAAGCTGCAAACGTTGTAAAACTATAA
GCF_002442935.1_WP_019469926.1	MNNGTVKWFNSEKGFGFIEVEGGNDVFVHFSAINQDGYKSLEEGQAVEFEIVEGDRGPQAANVIKL	ATGAATAACGGTACAGTTAAATGGTTTAACTCAGAAAAAGGTTTTGGTTTTATCGAAGTTGAAGGTGGAAACGACGTATTCGTACACTTCTCAGCAATCAACCAAGACGGCTACAAATCATTAGAAGAAGGACAAGCTGTTGAATTCGAAATCGTTGAAGGCGACCGCGGACCTCAAGCAGCTAACGTTATCAAATTATAA
GCF_002499975.2_WP_075609597.1	MAVGKVKWFNNAKGFGFIVPEDGGEDIFAHYSTIQMEGYRSLKAGQEVKFDVQQGPKGLHAENIGLVDEPER	ATGGCGGTTGGAAAAGTTAAATGGTTTAACAACGCAAAAGGGTTTGGTTTTATCGTTCCGGAAGATGGCGGTGAAGATATTTTCGCCCATTATTCTACCATTCAGATGGAAGGTTATCGTTCATTAAAAGCTGGGCAAGAAGTTAAATTCGATGTTCAGCAGGGCCCCAAAGGCTTGCATGCCGAAAATATTGGCTTGGTCGACGAGCCTGAGCGTTAA
GCF_002504285.1_WP_004094893.1	MAKIKGQVKWFNEAKGFGFITPADGSKDVFVHFSAIQGNGFKTLAEGQHVEFEIQDGQKGPSAVNVTAI	ATGGCTAAGATCAAAGGTCAAGTGAAGTGGTTCAACGAAGCGAAGGGTTTCGGTTTCATCACCCCGGCTGACGGCAGCAAGGACGTGTTCGTTCACTTCTCTGCAATCCAAGGCAATGGTTTCAAAACTCTGGCTGAAGGTCAGCACGTAGAGTTCGAAATCCAGGATGGCCAGAAAGGCCCGTCTGCTGTTAACGTAACTGCTATCTAA
GCF_002504285.1_WP_005287631.1	METGTVKWFNNAKGFGFICPAGGGDDIFAHYTSIQMEGYRTLKAGQRVQFELHIGPKGNHADTIIPLPNEPLA	ATGGAGACGGGTACCGTAAAGTGGTTTAACAACGCCAAAGGCTTTGGCTTCATCTGTCCAGCCGGCGGCGGCGACGATATTTTTGCCCATTACACCTCGATTCAAATGGAGGGTTACCGCACGCTGAAGGCGGGTCAACGGGTACAGTTTGAGCTTCATATTGGGCCGAAAGGCAATCATGCCGACACCATTATCCCCCTTCCCAACGAGCCGCTCGCGTAA
GCF_002504285.1_WP_005288610.1	MSNKMTGSVKWFNADKGFGFISPADGSKDVFVHFSAIQSNEFRTLDEGQKVEFSVENGPKGPSAVNVVAIN	ATGTCTAATAAAATGACTGGTTCTGTAAAATGGTTCAACGCAGATAAAGGCTTCGGCTTTATCTCCCCGGCTGATGGTAGCAAGGACGTTTTCGTTCACTTCTCTGCTATCCAAAGCAATGAATTCCGTACCCTGGATGAAGGACAAAAGGTTGAGTTCTCTGTAGAGAATGGCCCTAAAGGTCCTTCAGCCGTAAACGTAGTTGCTATCAACTAA
GCF_002504285.1_WP_005293608.1	MSKKTGQVKWFNESKGFGFITPADGSKDVFVHFSAIQSDGFKTLAEGQQVEFSIQDSPRGPAAADVVAL	ATGAGCAAGAAAACCGGCCAGGTCAAATGGTTCAACGAAAGCAAGGGATTTGGGTTTATCACGCCAGCTGATGGCTCAAAAGATGTCTTCGTCCATTTCTCTGCTATCCAGAGCGACGGTTTCAAGACCTTGGCAGAAGGTCAGCAGGTTGAGTTCTCTATTCAGGACTCCCCGCGCGGCCCGGCTGCGGCCGACGTGGTTGCCCTGTAA
GCF_002504285.1_WP_005296986.1	MSKKTGQVKWFNESKGFGFIEQHDGGKDVFVHFSAITGDGFKTLAEGQRVEYTIQDSPRGPAAANVVAL	ATGTCTAAGAAGACTGGTCAGGTAAAGTGGTTTAACGAAAGCAAAGGCTTCGGCTTTATCGAGCAGCATGACGGCGGTAAAGATGTATTCGTACATTTCTCTGCCATCACCGGTGACGGTTTCAAAACGTTGGCTGAAGGCCAGCGTGTAGAGTACACCATTCAGGACAGCCCGCGCGGGCCGGCTGCCGCCAACGTCGTCGCTCTGTAA
GCF_002504285.1_WP_097363985.1	MSNKMTGSVKWFNADKGFGFISPADGGKDVFVHFSAIQSNEFRTLDEGQKVEFSVENSPKGPSAVNVVAIN	ATGTCTAATAAAATGACTGGTTCTGTAAAATGGTTCAACGCCGATAAAGGCTTCGGTTTTATCTCTCCTGCTGATGGCGGCAAGGACGTTTTCGTTCACTTCTCTGCGATCCAAAGCAATGAATTCCGTACTCTGGATGAAGGTCAAAAGGTTGAGTTCTCTGTAGAGAATAGCCCTAAAGGCCCTTCCGCAGTAAACGTAGTCGCTATCAACTAA
GCF_002688605.1_WP_013055689.1	MVQGKVKWFNAEKGFGFIEVEGQDDVFVHFSAIQGEGFKSLEEGQEVTFEIEDGARGPQAANVQK	ATGGTACAAGGTAAAGTAAAATGGTTTAATGCAGAAAAAGGTTTTGGATTCATCGAAGTAGAAGGACAAGACGACGTATTCGTACACTTCTCAGCTATCCAAGGCGAAGGTTTCAAATCACTTGAAGAAGGTCAAGAAGTTACATTTGAAATCGAAGATGGAGCTCGTGGACCACAAGCTGCTAACGTTCAAAAGTAA
GCF_002688605.1_WP_013056130.1	MATTGTVKWFNSEKGFGFIEVPGENDVFVHFSAIQSEGFKTLEEGQKVEFEIVEGQRGPQAENVVKL	ATGGCTACTACAGGTACAGTAAAATGGTTTAACAGTGAAAAAGGCTTCGGTTTTATCGAAGTACCAGGCGAAAATGATGTGTTTGTTCATTTTTCAGCTATCCAATCTGAAGGCTTCAAAACATTAGAAGAAGGCCAAAAAGTTGAATTTGAAATCGTTGAAGGCCAACGTGGACCTCAAGCGGAGAATGTTGTAAAATTATAA
GCF_002688605.1_WP_013056175.1	MQNGKVKWFNNEKGYGFIEVEGGSDVFVHFSAIQSEGYKSLEEGQEVSFEIVEGNRGPQAANVTKLS	ATGCAAAATGGTAAAGTAAAATGGTTCAACAATGAAAAAGGCTATGGCTTTATTGAAGTTGAAGGCGGAAGCGACGTATTTGTACATTTTTCTGCCATCCAAAGCGAGGGTTATAAATCCTTGGAAGAAGGACAAGAGGTATCTTTTGAAATTGTAGAAGGCAATAGAGGCCCACAAGCCGCTAATGTCACTAAGCTATCATAA
GCF_002688605.1_WP_013057405.1	MEQGKVKWFNAEKGFGFIEREGGDDVFVHFSAIQSEGFKSLDEGQAVTFDVEQGQRGPQAANVQKA	ATGGAACAAGGTAAAGTAAAATGGTTTAACGCAGAAAAAGGTTTTGGATTCATCGAGCGCGAAGGTGGAGACGATGTATTCGTACACTTCTCAGCAATCCAAAGCGAAGGCTTCAAATCTTTAGACGAAGGTCAAGCTGTAACATTTGACGTAGAACAAGGTCAACGCGGACCTCAAGCTGCTAACGTTCAAAAAGCATAA
GCF_002688605.1_WP_013057408.1	MEKGTVKWFNAEKGFGFIERENGDDVFVHFSAIQSEGFKSLDEGQAVTFDVEEGQRGPQAANVQKA	ATGGAAAAAGGTACAGTAAAATGGTTTAACGCAGAAAAAGGTTTCGGATTTATCGAGCGCGAAAACGGCGACGATGTATTCGTACATTTCTCAGCAATCCAAAGCGAAGGATTCAAATCTTTAGACGAAGGTCAAGCTGTAACATTCGACGTTGAAGAAGGTCAACGCGGACCTCAAGCTGCTAACGTTCAAAAAGCATAA
GCF_002688605.1_WP_013057877.1	MLQGKVKWFNAEKGFGFIEVEGQDDVFVHFSAIQGEGFKTLEEGQEVTFEIVEGNRGPQAANVQK	ATGTTACAAGGTAAAGTAAAATGGTTCAACGCTGAAAAAGGTTTCGGTTTCATCGAAGTAGAAGGACAAGACGATGTATTCGTACACTTCTCTGCTATCCAAGGCGAAGGTTTCAAAACTTTAGAAGAAGGTCAAGAAGTTACATTTGAAATCGTTGAAGGCAACCGTGGACCACAAGCTGCTAACGTTCAAAAGTAA
GCF_002706425.1_WP_003679612.1	MEQGTVKWFNPEKGFGFISRENGSDVFVHFSAIQGEGFKTLEEGQAVTFDIEESDRGPQAVNVNKA	ATGGAACAAGGTACAGTTAAATGGTTCAACCCTGAAAAAGGCTTCGGTTTTATCTCACGCGAAAATGGTAGCGATGTATTCGTTCATTTTTCAGCTATCCAAGGCGAAGGTTTTAAAACTCTTGAAGAAGGCCAAGCTGTAACATTTGACATTGAAGAAAGCGATCGCGGCCCACAAGCTGTTAACGTTAATAAAGCATAG
GCF_002706425.1_WP_010009832.1	MELGTVKWFNADKGYGFITRDNGSDVFVHFSAIQGEGYKSLEEGQHVTFDVEDSDRGPQATNVVKD	ATGGAATTAGGTACAGTTAAATGGTTTAACGCAGACAAAGGTTATGGCTTCATTACTCGCGACAATGGCAGCGATGTATTCGTACATTTCTCAGCTATCCAAGGCGAAGGTTACAAGTCTTTAGAAGAAGGCCAACATGTAACATTTGACGTTGAAGACAGCGATCGTGGCCCACAAGCGACTAACGTTGTTAAAGACTAG
GCF_002706745.1_WP_010020786.1	MEHGTVKWFNAEKGYGFITREDGSDVFVHFSAIQGDGYKTLEEGQAVTFDIEDSDRGPQASNVVKD	ATGGAACACGGAACAGTTAAATGGTTTAACGCAGAAAAAGGCTATGGTTTTATTACACGCGAAGATGGTAGTGACGTATTTGTTCACTTCTCAGCAATCCAAGGTGACGGTTACAAGACACTTGAAGAAGGTCAAGCTGTAACATTCGATATCGAAGATTCAGATCGTGGCCCACAAGCTTCAAACGTTGTTAAGGACTAA
GCF_002706795.1_WP_003334330.1	MQGKVKWFNAEKGFGFIERDGGDDVFVHFSAIQSEGFKSLDEGQTVEFDIVEGDRGPQAANVTKI	ATGCAAGGAAAAGTAAAATGGTTTAATGCAGAAAAAGGTTTTGGTTTCATCGAACGCGATGGAGGCGACGATGTATTCGTACATTTCTCCGCTATCCAATCCGAAGGTTTCAAAAGCTTGGATGAAGGTCAAACTGTAGAGTTTGATATCGTTGAAGGCGACCGTGGTCCTCAAGCGGCAAACGTAACTAAAATCTAA
GCF_002706795.1_WP_003338386.1	MQQGTVKWFNAEKGFGFIQVEGGEDVFVHYSAIQTEGFKTLEEGQKVEFEIVQGSRGPQAANVNRL	ATGCAACAAGGTACTGTAAAATGGTTTAACGCAGAAAAAGGTTTTGGTTTCATTCAAGTTGAAGGCGGAGAAGATGTATTCGTACACTACAGCGCTATCCAAACTGAAGGTTTCAAAACTCTTGAAGAAGGTCAAAAAGTTGAGTTTGAAATCGTTCAAGGTAGCCGTGGACCACAAGCTGCTAACGTTAATCGTCTGTAA
GCF_002736065.1_WP_062573543.1	MASGKVKWFNNAKGYGFINEDGKTDDLFAHYSAIQMDGYKTLKAGQAVNFEIIQGPKGLHATDIRSATSNVQASATNPGNTVEV	ATGGCAAGCGGTAAAGTCAAGTGGTTCAACAATGCCAAGGGCTACGGATTCATCAACGAGGATGGCAAGACCGATGATCTGTTCGCCCACTATTCAGCGATCCAGATGGACGGTTACAAGACGCTGAAAGCCGGCCAGGCCGTGAACTTCGAGATCATCCAGGGCCCCAAAGGGCTGCACGCGACCGACATCAGAAGCGCCACCAGCAACGTCCAGGCCAGCGCGACGAACCCAGGCAATACCGTCGAAGTCTGA
GCF_002741055.1_WP_006207896.1	MQTGTVKWFNAEKGFGFIEVEGGNDVFVHFSAIQGDGFKTLDEGQRVEFNIVEGNRGPQAENVVKL	ATGCAAACAGGAACTGTTAAATGGTTTAATGCTGAGAAGGGCTTCGGTTTCATCGAAGTTGAAGGCGGAAACGATGTATTCGTTCACTTCAGCGCGATCCAAGGCGATGGCTTCAAGACGCTGGACGAAGGCCAACGCGTTGAGTTCAACATCGTTGAAGGCAACCGTGGACCACAAGCTGAGAACGTTGTAAAACTGTAA
GCF_002741055.1_WP_009225364.1	MQGKVKWFNAEKGYGFIETEEGGDVFVHFSAIQAEGFKTLEEGQSVEFEIVEGARGPQAANVIKL	ATGCAAGGTAAAGTTAAATGGTTCAACGCAGAGAAAGGTTATGGCTTCATCGAGACTGAAGAAGGCGGCGACGTTTTCGTACACTTCTCCGCGATCCAAGCTGAAGGCTTCAAGACGCTGGAAGAAGGACAATCCGTTGAATTCGAAATCGTTGAAGGTGCACGTGGCCCGCAAGCAGCTAACGTAATCAAATTATAA
GCF_002741055.1_WP_028405178.1	MKGTVKWFNAEKGYGFISVEGGEDVFVHFSAIQEEGFKTLEEGQAVEFEITEGNRGPQAANVTKL	TTGAAAGGTACAGTTAAATGGTTTAACGCAGAAAAAGGTTACGGCTTCATTTCCGTTGAAGGTGGCGAGGATGTATTCGTACACTTCTCCGCAATTCAAGAAGAAGGTTTCAAAACTTTGGAAGAAGGTCAAGCGGTAGAATTCGAAATTACAGAAGGTAACCGTGGTCCTCAAGCAGCCAACGTAACAAAACTGTAA
GCF_002752675.1_WP_010395943.1	MATGTVKWFNDSKGFGFITPDDGGEDLFAHFSAINMNGFKTLKEGQKVQFEVTQGPKGKQASNIQAA	ATGGCAACAGGTACAGTTAAGTGGTTCAATGATTCCAAAGGTTTTGGCTTCATCACTCCAGATGACGGCGGCGAAGATTTGTTCGCGCACTTTTCCGCAATCAACATGAACGGTTTCAAGACCCTCAAAGAAGGTCAAAAAGTTCAATTCGAAGTCACGCAAGGCCCTAAAGGCAAGCAAGCTTCCAACATCCAGGCTGCATAA
GCF_002752675.1_WP_010398811.1	MATGIVKWFNDSKGFGFITPDEGGEDLFAHFSAIQSNGFKSLQENQRVSFEVTAGPKGKQASNIQPI	ATGGCAACTGGCATCGTAAAATGGTTCAATGATTCGAAGGGTTTTGGCTTTATCACTCCTGATGAAGGCGGCGAAGATCTGTTCGCTCACTTCTCGGCGATTCAGTCGAACGGCTTCAAATCTTTGCAAGAGAACCAACGCGTCTCTTTCGAAGTAACCGCTGGCCCTAAAGGCAAGCAAGCTTCGAACATTCAGCCAATCTAA
GCF_002762335.1_WP_099974337.1	MEHGTVKWFNAEKGYGFLTREDGSDVFVHFSAIQGDGYKTLEEGQAVSFDIEDSDRGPQASNVNKD	ATGGAACATGGAACAGTAAAATGGTTTAACGCAGAAAAGGGTTATGGTTTCTTAACTCGTGAAGATGGAAGTGACGTATTCGTTCACTTCTCAGCTATCCAAGGTGATGGTTACAAAACTCTTGAAGAAGGTCAAGCTGTATCATTCGATATCGAAGATTCAGATCGTGGACCACAAGCTTCAAACGTAAATAAAGACTAA
GCF_002777255.1_WP_148132827.1	MIGKVKWFNAEKGFGFIEREGGSDVFVHFSAIQSEGFKTLEEGQNVEFEIVEGPRGPQAANVVKL	ATGATAGGCAAAGTTAAGTGGTTCAACGCGGAAAAGGGTTTCGGTTTCATTGAAAGAGAAGGTGGTAGCGATGTTTTTGTTCACTTCTCTGCGATTCAATCTGAAGGTTTTAAAACTCTGGAAGAAGGACAAAATGTCGAGTTTGAAATTGTGGAAGGACCCCGAGGCCCTCAGGCAGCTAACGTTGTCAAATTATAA
GCF_002804065.1_WP_013075938.1	MKGKVKWFNAEKGYGFITPDDGGKDVFVHYSAIQEEGFRTLEEGQDVEYDIVEGPRGPQAANVVKL	GTGAAAGGCAAAGTCAAGTGGTTCAATGCGGAGAAGGGTTATGGTTTCATTACGCCGGATGACGGCGGGAAAGACGTGTTTGTGCATTATAGCGCGATTCAGGAAGAAGGGTTTCGTACACTCGAAGAGGGCCAGGACGTCGAGTACGACATCGTGGAAGGTCCGCGGGGCCCTCAGGCAGCGAATGTCGTGAAGTTGTAA
GCF_002804065.1_WP_100667590.1	MQGRVKWFNAEKGYGFIEREDGGDVFVHFSAIQQEGFKSLEEGQLVEFDIVEGARGPQAANVVKL	ATGCAAGGAAGGGTTAAATGGTTTAACGCGGAAAAGGGCTACGGGTTCATCGAACGGGAGGACGGGGGCGACGTGTTCGTCCACTTTTCCGCGATCCAGCAGGAGGGCTTTAAAAGCCTCGAAGAAGGACAGTTGGTGGAGTTTGACATTGTGGAAGGTGCTCGTGGTCCCCAAGCCGCGAACGTCGTCAAACTGTAA
GCF_002812485.1_WP_005968829.1	MAKIKGQVKWFNESKGFGFITPADGSKDVFVHFSAIQGNGFKTLAEGQNVEFEIQDGQKGPSAVNVTAL	ATGGCAAAGATTAAAGGTCAGGTTAAGTGGTTCAACGAGTCTAAAGGCTTCGGTTTCATCACTCCGGCTGATGGCAGCAAAGACGTGTTCGTACACTTCTCTGCAATTCAGGGCAACGGTTTTAAAACCTTAGCCGAAGGCCAGAATGTTGAGTTTGAAATTCAGGATGGCCAGAAAGGTCCTTCTGCAGTGAACGTTACTGCGCTGTAA
GCF_002812485.1_WP_009113827.1	MSKIKGSVKWFNESKGFGFITPEDGSKDVFVHFSAIQSNGFKTLAEGQRVEFEITSGAKGPSAANVIAI	ATGTCTAAGATTAAAGGTAGCGTTAAGTGGTTTAATGAGTCCAAAGGATTCGGTTTCATTACTCCGGAAGATGGCAGCAAGGACGTATTCGTTCACTTCTCTGCTATCCAGAGCAACGGTTTCAAAACCCTGGCTGAAGGTCAGCGCGTAGAGTTTGAAATCACCAGCGGCGCTAAAGGACCTTCTGCTGCTAACGTTATCGCTATTTAA
GCF_002812485.1_WP_013319797.1	MSNKMTGSVKWFNETKGFGFITPADGSKDVFVHFSAIQSDSFKTLYEGQKVEFVIGNGPKGPSAENVVGL	ATGTCTAATAAAATGACTGGTTCAGTAAAATGGTTTAACGAAACTAAAGGTTTTGGCTTCATCACTCCGGCTGACGGCAGCAAAGACGTGTTCGTTCACTTCTCCGCCATTCAGAGCGATAGCTTCAAAACTCTGTACGAAGGCCAGAAAGTTGAATTCGTTATCGGCAACGGCCCGAAAGGTCCTTCCGCTGAAAACGTTGTAGGGCTGTAA
GCF_002812485.1_WP_022633331.1	METGTVKWFNNAKGFGFICPESGGEDIFAHYSTIQMDGYRTLKAGQVVQFTVHQGPKGNHASLIVPVVGETVA	ATGGAGACAGGTACTGTTAAATGGTTCAATAACGCCAAAGGCTTTGGCTTTATTTGTCCCGAGAGCGGCGGTGAAGATATCTTCGCCCACTATTCAACCATTCAGATGGACGGCTACAGGACGCTGAAAGCAGGTCAGGTGGTGCAATTCACTGTACACCAGGGACCCAAAGGAAATCACGCCAGTCTGATCGTGCCGGTAGTCGGCGAAACGGTCGCCTGA
GCF_002813755.1_WP_005875554.1	METGTVKWFNSEKGFGFITAENGNDVFVHFSAIQGDGFKTLEEGQTVNFDVEEGQRGPQATNVVKA	ATGGAAACAGGTACAGTGAAATGGTTTAACTCAGAAAAAGGTTTCGGTTTCATTACAGCAGAAAACGGCAACGATGTATTCGTTCATTTCTCAGCTATCCAAGGTGATGGATTCAAAACTTTAGAAGAAGGCCAAACAGTAAACTTCGATGTTGAAGAAGGTCAACGTGGCCCTCAAGCAACTAACGTTGTTAAAGCTTAA
GCF_002813755.1_WP_010736076.1	MENGTVKWFNAEKGFGFISREDGSDVFVHFSAIQGDGFKTLEEGQAVTFDVEDSDRGPQATNVEKA	ATGGAAAACGGAACAGTTAAATGGTTCAACGCTGAAAAAGGATTTGGTTTTATCTCACGTGAAGATGGAAGCGACGTATTCGTACATTTTTCAGCAATCCAAGGTGACGGATTCAAAACATTAGAAGAAGGTCAAGCAGTTACTTTTGACGTAGAAGATTCAGATCGTGGCCCACAAGCTACAAACGTTGAAAAAGCGTAA
GCF_002843235.3_WP_004257099.1	MSKVKGNVKWFNESKGFGFITPEDGSKDVFVHFSAIMGDGFKTLAEGQKVEFEITEGAKGPSAANVIPL	ATGTCTAAAGTTAAAGGTAACGTTAAGTGGTTCAACGAATCTAAAGGTTTTGGTTTTATCACTCCAGAAGATGGTAGCAAAGATGTATTTGTTCACTTTTCTGCGATTATGGGCGATGGTTTCAAAACCTTAGCTGAAGGCCAAAAAGTGGAATTTGAAATTACTGAAGGTGCTAAAGGCCCATCTGCTGCTAACGTTATTCCTCTGTAA
GCF_002843235.3_WP_004909801.1	MSDKMKGQVKWFNESKGFGFITPADGSKDVFVHFSAIQGNGFKTLAEGQQVEFTIENGAKGPAAANVTAI	ATGTCCGACAAAATGAAAGGTCAAGTTAAGTGGTTCAACGAGTCTAAAGGCTTCGGTTTCATCACTCCAGCTGATGGTAGCAAAGACGTTTTCGTCCACTTCTCTGCCATTCAGGGCAATGGTTTCAAAACTCTGGCTGAAGGTCAGCAAGTTGAATTCACCATTGAAAACGGTGCAAAAGGCCCAGCAGCTGCTAACGTAACTGCTATCTAA
GCF_002843235.3_WP_102138446.1	METGIVKWFNNAKGFGFICPADGGEDIFAHYSCIQMDGYRTLKAGQKVQFSLTIGPKGNHAELIIPIEAEDNSANNSESS	ATGGAGACAGGTATCGTTAAGTGGTTCAATAACGCAAAAGGCTTTGGCTTTATTTGCCCAGCTGATGGCGGAGAAGATATTTTTGCACATTATTCCTGTATCCAAATGGACGGTTACAGGACACTAAAAGCGGGCCAGAAAGTTCAGTTCAGTTTAACCATTGGGCCAAAAGGCAACCACGCTGAGCTTATCATCCCTATTGAAGCTGAAGACAATTCCGCTAATAACAGCGAATCGAGCTAA
GCF_002843235.3_WP_102139626.1	MSNTMTGSVKWFNDDKGFGFITPADGSKDVFVHFSAIQSESFKTLAEGQQVTFTIENGAKGPAAANVIVK	ATGTCTAATACAATGACTGGTTCAGTAAAATGGTTTAACGATGATAAAGGTTTTGGCTTCATTACACCTGCAGATGGCAGCAAAGATGTATTTGTTCATTTCTCTGCAATTCAAAGCGAAAGCTTCAAAACTTTAGCAGAAGGCCAACAAGTTACATTCACCATTGAAAATGGTGCGAAAGGCCCAGCAGCAGCTAACGTTATCGTAAAATAA
GCF_002846995.1_WP_009113827.1	MSKIKGSVKWFNESKGFGFITPEDGSKDVFVHFSAIQSNGFKTLAEGQRVEFEITSGAKGPSAANVIAI	ATGTCTAAGATTAAAGGTAGCGTTAAGTGGTTTAATGAATCCAAAGGATTCGGTTTCATTACTCCGGAAGATGGCAGCAAGGACGTATTCGTTCACTTTTCTGCTATCCAGAGCAACGGTTTCAAAACCCTGGCTGAAGGTCAGCGCGTAGAGTTTGAAATCACCAGTGGCGCTAAAGGACCTTCTGCTGCTAACGTTATCGCTATTTAA
GCF_002846995.1_WP_012769694.1	MAKIKGQVKWFNESKGFGFITPADGSKDVFVHFSAIQGNGFKTLAEGQNVEFEIQDGQKGPSAVNVVAL	ATGGCAAAGATTAAAGGTCAGGTTAAGTGGTTCAACGAGTCTAAAGGCTTCGGTTTCATCACTCCGGCTGATGGCAGCAAAGACGTGTTCGTACACTTCTCTGCAATTCAGGGCAACGGCTTTAAAACCTTAGCCGAAGGCCAGAATGTTGAGTTTGAAATTCAGGATGGCCAGAAAGGTCCTTCTGCAGTGAACGTTGTTGCGCTGTAA
GCF_002846995.1_WP_022633331.1	METGTVKWFNNAKGFGFICPESGGEDIFAHYSTIQMDGYRTLKAGQVVQFTVHQGPKGNHASLIVPVVGETVA	ATGGAGACAGGTACTGTTAAATGGTTCAATAACGCCAAAGGCTTTGGCTTTATTTGTCCCGAAAGCGGCGGTGAAGATATATTCGCCCATTACTCAACCATTCAGATGGACGGCTACAGGACCCTGAAAGCAGGTCAGGTAGTGCAATTCACCGTGCACCAGGGACCCAAAGGAAATCACGCCAGTCTGATCGTGCCGGTAGTCGGCGAAACGGTCGCCTGA
GCF_002846995.1_WP_022635207.1	MSNKMTGSVKWFNESKGFGFITPADGSKDVFVHFSAIQSDSFKTLYEGQKVEFVIGNGPKGPSAENVVGL	ATGTCTAATAAAATGACTGGTTCAGTAAAATGGTTTAACGAATCTAAAGGTTTTGGTTTTATCACTCCGGCTGACGGCAGCAAAGACGTGTTTGTTCATTTCTCTGCCATCCAGAGCGATAGCTTCAAGACCCTGTACGAAGGTCAGAAAGTTGAATTCGTTATCGGCAACGGCCCGAAAGGTCCTTCTGCTGAAAACGTTGTAGGGCTGTAA
GCF_002849835.1_WP_021288643.1	MTGKVKWFNAEKGFGFIEREDGDDVFVHFSAIQAEGFKTLEEGQDVEFEIVEGNRGPQAANVTRL	ATGACTGGTAAAGTAAAATGGTTTAATGCAGAAAAAGGATTCGGTTTCATCGAGCGTGAAGACGGAGACGACGTATTTGTTCACTTCTCAGCTATTCAAGCTGAAGGTTTCAAAACTCTTGAAGAAGGTCAAGACGTTGAATTTGAAATCGTAGAAGGAAACCGCGGACCACAAGCAGCTAACGTAACTCGTCTATAA
GCF_002849875.1_WP_012519905.1	MSKVTGTVKWFNADKGYGFLTQDNGGKDVFVHFRAIISDGYKTLPEGQRVEFEVEEGQKGLQAANVQAI	ATGTCTAAAGTTACAGGCACAGTTAAGTGGTTCAACGCTGATAAAGGTTACGGTTTTCTAACTCAAGATAACGGCGGTAAGGACGTATTCGTTCATTTCCGTGCGATCATCTCTGACGGTTACAAAACGCTTCCAGAAGGTCAGCGAGTAGAATTTGAAGTTGAAGAAGGTCAAAAAGGTCTTCAAGCTGCTAACGTGCAAGCTATCTAA
GCF_002849875.1_WP_014948776.1	MSNSVNGTVKWFNEEKGFGFITPEAGGKDVFVHFRSIASDGFKTLKEGQEVSFEVEQGQKGPQAANVVVR	ATGTCTAATTCTGTAAACGGTACAGTTAAGTGGTTCAACGAAGAAAAAGGTTTTGGTTTCATCACTCCTGAAGCTGGCGGCAAAGACGTATTCGTACACTTCCGTTCAATTGCTTCTGACGGTTTCAAAACGTTGAAAGAAGGCCAAGAAGTTAGCTTCGAAGTTGAACAAGGCCAAAAAGGTCCTCAAGCTGCTAACGTAGTAGTTCGATAA
GCF_002849875.1_WP_014949330.1	MAVGKVKWFNNAKGFGFIVPEDGGEDIFAHYSTIQMEGYRSLKAGQEVTFEVQQGPKGLHAENIGFKEEPER	ATGGCGGTTGGCAAAGTTAAATGGTTTAACAACGCAAAGGGTTTTGGATTTATCGTTCCTGAGGACGGCGGCGAAGATATTTTCGCGCATTACTCTACGATTCAAATGGAAGGCTACCGTTCGCTAAAAGCGGGTCAAGAAGTAACGTTCGAAGTTCAGCAAGGGCCTAAAGGTCTTCACGCTGAGAACATTGGCTTCAAAGAAGAACCAGAGCGTTAA
GCF_002849895.1_WP_010020786.1	MEHGTVKWFNAEKGYGFITREDGSDVFVHFSAIQGDGYKTLEEGQAVTFDIEDSDRGPQASNVVKD	ATGGAACACGGAACAGTTAAATGGTTTAACGCAGAAAAAGGCTATGGTTTTATTACACGCGAAGATGGTAGTGACGTATTTGTTCACTTCTCAGCAATCCAAGGTGACGGTTACAAGACACTTGAAGAAGGTCAAGCTGTAACATTCGACATCGAAGATAGTGATCGTGGACCACAAGCTTCAAACGTTGTTAAGGACTAA
GCF_002865995.1_WP_021121202.1	MKQGIVKWFNNEKGFGFISVEGGDDVFVHFSAIQRDGYKSLEEGQAVNFEIVEGARGPQAANVTLA	ATGAAACAAGGAATAGTAAAATGGTTTAACAATGAAAAAGGATTTGGATTTATATCTGTAGAAGGTGGAGATGACGTATTCGTACATTTCTCAGCTATACAAAGAGATGGATACAAATCATTAGAAGAAGGTCAAGCTGTTAACTTTGAAATAGTTGAAGGTGCTAGAGGACCTCAAGCTGCTAACGTTACTTTAGCATAA
GCF_002865995.1_WP_021124043.1	MMNGTVKWFNNEKGFGFISVEGGDDVFVHFSAIQKDGFKSLEEGQVVNFEIVEGARGPQAANVTIAE	ATGATGAATGGAACAGTTAAATGGTTTAATAATGAAAAAGGATTTGGATTTATATCTGTAGAAGGTGGAGACGATGTATTCGTGCATTTCTCAGCTATACAAAAAGATGGTTTCAAATCTTTAGAAGAAGGTCAAGTAGTTAACTTTGAAATAGTTGAAGGAGCAAGAGGACCTCAAGCTGCTAATGTAACTATAGCAGAATAA
GCF_002887555.1_WP_009113827.1	MSKIKGSVKWFNESKGFGFITPEDGSKDVFVHFSAIQSNGFKTLAEGQRVEFEITSGAKGPSAANVIAI	ATGTCTAAGATTAAAGGTAGCGTTAAGTGGTTTAATGAGTCCAAAGGATTCGGTTTCATTACTCCGGAAGATGGCAGCAAGGACGTATTCGTTCACTTTTCTGCTATCCAGAGCAACGGTTTCAAAACCCTGGCTGAAGGTCAGCGCGTAGAGTTTGAAATCACCAGCGGCGCTAAAGGACCTTCTGCTGCTAACGTTATCGCTATTTAA
GCF_002887555.1_WP_012768004.1	MSNKMTGSVKWFNESKGFGFISPADGSKDVFVHFSAIQSDSFKTLYEGQKVEFVIGNGPKGPSAENVVGL	ATGTCTAATAAAATGACTGGTTCAGTAAAATGGTTTAACGAATCTAAAGGTTTTGGCTTTATCAGCCCGGCTGATGGCAGCAAAGACGTATTCGTACATTTCTCTGCAATTCAGAGCGACAGCTTCAAAACGCTGTACGAAGGCCAGAAAGTAGAATTCGTTATCGGCAACGGTCCGAAAGGTCCTTCTGCTGAGAACGTAGTCGGGCTGTAA
GCF_002887555.1_WP_012769694.1	MAKIKGQVKWFNESKGFGFITPADGSKDVFVHFSAIQGNGFKTLAEGQNVEFEIQDGQKGPSAVNVVAL	ATGGCAAAGATTAAAGGTCAGGTTAAGTGGTTCAACGAGTCTAAAGGCTTCGGTTTCATTACTCCGGCTGATGGCAGCAAAGATGTGTTCGTACACTTCTCTGCAATTCAGGGCAACGGCTTCAAAACATTGGCTGAAGGCCAGAATGTTGAGTTCGAAATTCAGGATGGCCAGAAAGGTCCTTCTGCAGTGAATGTTGTTGCGCTGTAA
GCF_002887555.1_WP_012770072.1	METGTVKWFNNAKGFGFICPESGGEDIFAHYSTIQMDGYRTLKAGQVVQFTVHQGPKGNHASLIVPVAGETVA	ATGGAGACAGGTACTGTTAAATGGTTCAATAACGCCAAAGGCTTTGGCTTTATTTGCCCCGAAAGCGGTGGTGAAGATATTTTCGCCCACTATTCAACCATTCAGATGGACGGCTACAGGACGCTAAAAGCAGGTCAGGTCGTGCAATTTACCGTGCACCAGGGACCAAAAGGAAATCACGCCAGTCTGATCGTGCCGGTCGCCGGTGAAACGGTCGCCTGA
GCF_002887615.1_WP_038866741.1	MATGTVKWFNNAKGFGFICSDEEEGDIFAHYSTIQMDGYRTLKAGQQVSYEIEKGPKGSHASSVVPIEAQAK	ATGGCTACAGGTACAGTAAAGTGGTTTAACAATGCCAAAGGATTTGGGTTTATCTGTTCAGATGAAGAGGAAGGAGACATCTTTGCCCACTACTCAACTATCCAAATGGACGGTTATCGTACACTGAAAGCAGGCCAACAAGTCTCATACGAGATTGAAAAAGGTCCAAAGGGCTCACACGCTAGCAGCGTTGTTCCAATAGAAGCCCAAGCCAAATAA
GCF_002902965.1_WP_007580971.1	MATGTVKWFNDAKGFGFITPDGGGEDLFAHFSEIQSSGFKSLQENQKVTFEVKQGPKGKQAANIQPA	ATGGCAACAGGTACGGTGAAGTGGTTCAACGATGCAAAGGGTTTTGGTTTCATCACGCCGGATGGCGGCGGTGAAGACCTGTTTGCACATTTTTCGGAAATCCAGTCGAGCGGCTTCAAATCGCTCCAGGAAAACCAGAAAGTGACGTTTGAAGTGAAGCAGGGCCCGAAGGGCAAGCAGGCTGCGAACATCCAGCCGGCGTAA
GCF_002902965.1_WP_007581066.1	MATGTVKWFNDAKGFGFITPDDGGEDLFAHFSEVKAEGFKSLQEGQKVSFEVKQGPKGKQAANIQPI	ATGGCAACCGGTACTGTGAAGTGGTTTAACGATGCGAAGGGCTTTGGCTTCATTACGCCAGACGATGGCGGCGAAGATCTGTTTGCTCATTTTTCGGAAGTGAAGGCGGAGGGATTCAAGTCTCTTCAGGAGGGTCAAAAGGTGAGCTTCGAGGTCAAGCAAGGACCGAAGGGCAAGCAGGCGGCCAACATTCAACCGATCTGA
GCF_002902965.1_WP_007586257.1	MATGTVKWFNDAKGFGFITPDEGGEDLFAHFSAIQMNGFKTLKEGQKVSFEVVQGPKGKQASNIQSAA	ATGGCAACTGGTACGGTCAAGTGGTTCAACGACGCGAAAGGTTTCGGATTCATTACGCCCGACGAAGGCGGTGAGGATCTGTTTGCACACTTTTCGGCTATCCAGATGAACGGTTTCAAGACCCTCAAGGAAGGCCAAAAGGTTAGCTTCGAGGTCGTTCAAGGCCCGAAGGGTAAACAGGCATCGAACATTCAGTCCGCAGCCTGA
GCF_002902965.1_WP_007731769.1	METGTVKWFNDAKGFGFITPDAGGEDLFAHFSEIRVEGFKTLQENQKVTYDVKTGPKGKQAANIKPV	ATGGAAACCGGTACCGTCAAGTGGTTCAATGACGCAAAGGGCTTTGGTTTTATCACGCCGGACGCCGGCGGCGAAGATCTGTTCGCGCATTTCTCGGAAATCCGCGTAGAAGGCTTCAAGACGCTGCAGGAAAACCAAAAGGTTACCTACGACGTCAAGACGGGCCCGAAGGGCAAGCAGGCCGCTAACATCAAGCCGGTCTAA
GCF_002906475.1_WP_005427548.1	MATGTVKWFNNAKGFGFICSDEEEGDIFAHYSTIQMDGYRTLKAGQQVSYEIEKGPKGSHASSVVPIEGQAK	ATGGCTACAGGTACAGTAAAGTGGTTTAACAATGCCAAGGGATTTGGGTTTATTTGTTCAGACGAAGAGGAAGGAGACATTTTCGCCCACTACTCAACTATCCAAATGGACGGTTATCGTACACTGAAAGCAGGCCAACAAGTCTCATACGAGATTGAAAAAGGTCCAAAAGGTTCACACGCAAGTAGCGTAGTGCCAATAGAAGGCCAAGCCAAATAA
GCF_002951835.1_WP_002641241.1	MATGIVKWFNDAKGFGFITPDEGGEDLFAHFSAINMEGFKTLKEGQKVSFEVTTGPKGKQASNIQAA	ATGGCAACTGGTATTGTTAAATGGTTTAATGACGCTAAAGGTTTTGGTTTTATCACACCTGACGAAGGTGGCGAAGATTTGTTCGCACACTTCTCTGCGATTAATATGGAAGGCTTCAAAACTTTGAAAGAAGGTCAAAAAGTTTCTTTTGAAGTAACCACTGGCCCTAAAGGCAAACAGGCTTCTAATATCCAAGCAGCATAA
GCF_002951935.1_WP_017813974.1	MQTGTVKWFNAEKGFGFIEVEGGNDVFVHFSAIQGDGFKTLDEGQRVEFNVVEGNRGPQAENVVKL	GTGCAAACAGGTACAGTAAAATGGTTTAATGCAGAAAAAGGTTTTGGTTTTATTGAAGTTGAAGGCGGCAATGATGTATTCGTACATTTTAGCGCTATCCAAGGAGATGGATTCAAAACCCTGGACGAAGGACAACGAGTTGAGTTCAACGTAGTTGAAGGTAACCGCGGTCCCCAAGCCGAGAACGTAGTGAAACTGTAA
GCF_002951935.1_WP_023485092.1	MQGKVKWFNAEKGYGFIEREDGGDVFVHFSAIQGEGFKTLEEGQSVEFDIVEGARGPQAANVIKL	ATGCAAGGTAAAGTAAAATGGTTTAATGCAGAGAAAGGGTATGGCTTTATTGAGCGTGAAGATGGAGGAGACGTATTCGTACATTTCTCCGCTATCCAAGGCGAAGGCTTTAAAACCCTAGAAGAAGGACAATCCGTAGAATTTGATATTGTGGAAGGCGCTCGCGGACCACAAGCTGCTAACGTAATCAAATTATAA
GCF_002951935.1_WP_024093635.1	MKGTVKWFNAEKGYGFIQVDGGEDVFVHFSAIQGDGFKTLDEGQAVEFEITEGNRGPQAANVIKL	TTGAAAGGTACAGTTAAATGGTTTAACGCAGAAAAAGGTTATGGTTTTATCCAAGTTGATGGTGGAGAAGACGTATTCGTTCATTTTTCCGCAATCCAAGGAGACGGATTTAAAACATTGGATGAAGGTCAAGCTGTTGAATTCGAAATCACTGAAGGCAATCGTGGCCCTCAAGCAGCTAACGTCATTAAATTATAA
GCF_002952315.1_WP_001062678.1	MAKIKGQVKWFNESKGFGFITPADGSKDVFVHFSAIQGNGFKTLAEGQNVEFEIQDGQKGPAAVNVTAI	ATGGCAAAGATTAAAGGTCAGGTTAAGTGGTTCAACGAGTCTAAAGGTTTTGGTTTCATTACTCCTGCTGACGGCAGCAAAGATGTGTTCGTACACTTCTCTGCAATCCAGGGTAATGGCTTCAAAACTCTGGCTGAAGGCCAGAACGTTGAGTTCGAAATTCAGGATGGCCAGAAAGGCCCGGCAGCTGTGAACGTCACCGCTATCTGA
GCF_002952315.1_WP_004156612.1	MSKIKGSVKWFNESKGFGFITPEDGSKDVFVHFSAIQSNGFKTLAEGQRVEFEITNGAKGPSAANVAAI	ATGTCTAAGATTAAAGGTAGCGTTAAGTGGTTTAATGAGTCCAAAGGATTCGGTTTCATTACTCCTGAAGATGGTAGCAAAGATGTTTTCGTACACTTCTCTGCCATCCAGAGCAACGGTTTCAAAACTCTGGCTGAAGGTCAGCGCGTAGAGTTCGAAATCACCAACGGTGCCAAAGGCCCATCTGCTGCTAACGTTGCCGCTATTTAA
GCF_002952315.1_WP_012442280.1	MSNKMTGLVKWFNAEKGFGFISPTDGSKDVFVHFSAIQNGGFKTLEEGQKVEFTIENGQKGPAAANVTAL	ATGTCTAACAAAATGACTGGTTTGGTAAAATGGTTCAACGCTGAGAAAGGTTTCGGCTTCATCTCCCCAACCGACGGCAGCAAAGACGTTTTCGTACACTTCTCTGCAATCCAGAACGGCGGCTTCAAGACGCTGGAAGAAGGTCAGAAAGTTGAGTTCACTATCGAAAATGGCCAGAAAGGCCCTGCAGCTGCTAACGTAACTGCGCTGTAA
GCF_002952315.1_WP_014543870.1	MMTGTVKWFNNAKGFGFICPVGGGDDIFAHYSTIQMDGYRTLKAGQQVQFDVHQGPKGNHASLIVPVEEVLAISA	ATGATGACGGGTACTGTTAAATGGTTTAATAACGCCAAAGGCTTCGGTTTCATCTGTCCGGTGGGCGGTGGCGATGATATCTTCGCGCACTACTCCACTATCCAGATGGACGGTTACAGAACGCTGAAAGCCGGGCAGCAAGTCCAGTTTGACGTGCATCAGGGACCAAAGGGCAACCATGCCAGCCTCATAGTCCCTGTGGAAGAAGTGCTGGCGATTAGCGCCTGA
GCF_002953195.1_WP_004386688.1	MAKIKGQVKWFNESKGFGFITPADGSKDVFVHFSAIQGNGFKTLAEGQNVEFEIQDGQKGPAAVNVVAI	ATGGCAAAAATTAAAGGTCAGGTGAAGTGGTTTAACGAATCCAAAGGTTTTGGCTTCATTACTCCGGCGGACGGTAGCAAAGATGTGTTCGTTCACTTCTCCGCTATCCAGGGTAACGGTTTCAAAACGCTGGCTGAAGGTCAGAACGTTGAGTTCGAAATTCAGGATGGTCAGAAAGGTCCGGCAGCGGTTAACGTTGTGGCGATCTGA
GCF_002953195.1_WP_038625465.1	MSNKMTGLVKWFNAEKGFGFISPEDGSKDVFVHFSAIQSNDFKTLDEGQKVQFSVENGAKGPSATNVVAL	ATGTCTAATAAAATGACTGGTTTAGTAAAATGGTTCAACGCTGAAAAAGGCTTCGGCTTTATCTCTCCGGAAGACGGCAGCAAAGATGTATTCGTACATTTCTCTGCTATCCAGAGCAACGATTTCAAAACCCTTGATGAAGGTCAGAAAGTGCAGTTCTCTGTTGAGAACGGCGCGAAAGGCCCTTCAGCAACGAACGTAGTTGCGCTGTAA
GCF_002953195.1_WP_038627478.1	MSKIKGNVKWFNESKGFGFITPEDGSKDVFVHFSAIQSNGFKTLAEGQRVEFEITDGAKGPSAANVIAL	ATGTCCAAGATCAAAGGTAACGTTAAGTGGTTTAATGAGTCCAAAGGATTCGGCTTCATTACTCCGGAAGATGGCAGCAAAGACGTATTCGTACACTTCTCTGCTATCCAGAGCAATGGTTTCAAAACTCTGGCTGAAGGTCAGCGCGTAGAGTTCGAAATCACTGACGGCGCAAAAGGCCCATCTGCTGCTAACGTTATCGCTCTGTAA
GCF_002953195.1_WP_038627682.1	MSAKLTGLVKWFNAEKGFGFISPADGSKDVFVHFSAIQNQGFKTLEEGQNVEFTIENGPKGPAAANVTVR	ATGTCTGCAAAACTGACTGGTTTAGTAAAATGGTTCAACGCTGAGAAAGGTTTCGGCTTCATTTCTCCGGCTGATGGCAGCAAAGACGTGTTCGTACACTTCTCTGCAATCCAGAACCAGGGTTTCAAAACTCTGGAAGAAGGTCAGAACGTTGAGTTCACCATCGAAAACGGCCCGAAAGGTCCGGCTGCTGCTAACGTCACCGTACGCTAA
GCF_002953195.1_WP_104956822.1	MEKGTVKWFNNAKGFGFICPIGGGDDIFAHYSSIQMEGYRTLKAGQPVQFAVHEGPKGNHASLIVPLEAAEGLRA	ATGGAGAAGGGTACAGTTAAATGGTTCAACAACGCCAAAGGATTCGGCTTTATCTGCCCGATCGGCGGCGGCGATGATATCTTTGCCCACTATTCCTCAATCCAGATGGAGGGATACAGGACGCTCAAAGCCGGGCAACCCGTTCAGTTTGCTGTCCATGAAGGCCCGAAAGGCAATCACGCCAGCCTTATCGTTCCGCTGGAAGCGGCCGAAGGCCTCCGTGCCTGA
GCF_002982135.1_WP_046871276.1	MEHGTVKWFNADKGFGFITRENGSDVFVHFSAIQGDGFKTLEEGQAVTFDVEESDRGPQAVNVNKD	ATGGAACATGGTACAGTTAAATGGTTTAACGCAGACAAAGGTTTTGGTTTTATTACTCGCGAAAACGGTAGCGATGTATTCGTACATTTCTCAGCTATCCAAGGCGACGGCTTCAAGACTCTTGAAGAAGGCCAAGCAGTTACTTTCGATGTAGAAGAAAGTGACCGTGGACCACAAGCAGTTAACGTAAACAAAGACTAA
GCF_002993925.1_WP_003155376.1	MLEGKVKWFNSEKGFGFIEVEGQDDVFVHFSAIQGEGFKTLEEGQSVSFEIVEGNRGPQAANVTKA	ATGCTAGAAGGTAAAGTAAAATGGTTTAACTCTGAAAAAGGTTTCGGATTCATCGAAGTTGAAGGACAAGACGATGTATTCGTTCATTTCTCTGCTATTCAAGGCGAAGGCTTCAAAACTTTGGAAGAAGGCCAATCTGTATCTTTCGAAATCGTTGAAGGAAACCGCGGACCACAAGCTGCTAACGTAACAAAAGCGTAA
GCF_002993925.1_WP_003179166.1	MEQGTVKWFNAEKGFGFIERENGDDVFVHFSAIQSDGFKSLDEGQKVTFDVEQGPRGAQAANVQKTA	ATGGAACAAGGTACAGTTAAATGGTTTAATGCAGAAAAAGGTTTTGGATTTATCGAACGTGAAAATGGAGACGATGTATTCGTACACTTTTCTGCAATCCAAAGTGACGGATTCAAATCATTAGACGAAGGTCAAAAAGTAACATTTGACGTTGAGCAAGGTCCTCGCGGAGCTCAAGCTGCTAACGTTCAAAAAACTGCTTAA
GCF_002993925.1_WP_003230776.1	MQNGKVKWFNNEKGFGFIEVEGGDDVFVHFTAIEGDGYKSLEEGQEVSFEIVEGNRGPQASNVVKL	ATGCAAAACGGTAAAGTAAAATGGTTTAACAATGAAAAAGGCTTCGGCTTCATCGAAGTTGAAGGCGGAGACGATGTATTCGTTCATTTCACTGCAATCGAAGGTGACGGATACAAATCTCTAGAAGAAGGACAAGAAGTTTCTTTCGAGATTGTTGAAGGTAATCGTGGACCTCAAGCATCTAACGTTGTAAAGCTTTAA
GCF_003012915.1_WP_103209089.1	MKQSTVKWFNAEKGFGFIEVEGENDVFVHFSAINQEGYKSLEEGQSVEFEVVEGDRGPQAANVVKL	ATGAAACAAAGTACAGTAAAATGGTTTAACGCTGAAAAAGGTTTTGGTTTTATCGAAGTTGAAGGAGAAAACGATGTATTCGTACACTTCTCAGCTATTAACCAAGAAGGATACAAATCATTAGAAGAAGGTCAATCAGTTGAATTTGAAGTAGTTGAAGGCGACCGCGGTCCTCAAGCTGCAAACGTTGTTAAACTATAA
GCF_003019255.1_WP_001831260.1	MKQGTVKWFNAEKGFGFIEVEGENDVFVHFSAINQEGYKSLEEGQSVEFEVVEGDRGPQAANVVKL	ATGAAACAAGGTACAGTTAAATGGTTTAACGCTGAAAAAGGATTTGGTTTTATCGAAGTTGAAGGAGAAAACGACGTATTCGTACACTTCTCAGCTATTAACCAAGAAGGTTACAAATCATTAGAAGAAGGTCAATCAGTAGAATTTGAAGTAGTTGAAGGCGACCGCGGTCCTCAAGCTGCAAACGTTGTAAAACTATAA
GCF_003019925.1_WP_000034826.1	MSKIKGNVKWFNESKGFGFITPEDGSKDVFVHFSAIQTNGFKTLAEGQRVEFEITNGAKGPSAANVTAL	ATGTCTAAGATTAAAGGTAACGTTAAGTGGTTTAATGAGTCCAAAGGCTTTGGTTTCATTACTCCGGAAGATGGCAGCAAAGACGTGTTCGTACACTTCTCTGCAATCCAGACTAACGGTTTCAAAACTCTGGCTGAAGGTCAGCGCGTAGAGTTCGAAATCACTAACGGTGCCAAAGGCCCTTCTGCTGCTAACGTAACCGCTCTGTAA
GCF_003019925.1_WP_001062678.1	MAKIKGQVKWFNESKGFGFITPADGSKDVFVHFSAIQGNGFKTLAEGQNVEFEIQDGQKGPAAVNVTAI	ATGGCAAAGATTAAAGGTCAGGTTAAGTGGTTCAACGAGTCTAAAGGTTTTGGCTTCATTACTCCGGCTGACGGCAGCAAAGACGTGTTCGTACACTTCTCTGCCATCCAGGGTAATGGCTTCAAAACTCTGGCTGAAGGCCAGAACGTTGAATTCGAAATCCAGGACGGCCAGAAAGGCCCGGCAGCTGTTAACGTAACGGCTATCTGA
GCF_003019925.1_WP_043084454.1	MTTKMTGLVKWFNADKGFGFITPEDGSKDVFVHFSAIQSDDFRTLHENQKVEFAVENGAKGPSAVNVVAL	ATGACGACTAAAATGACCGGTCTGGTGAAATGGTTTAATGCAGATAAAGGTTTTGGTTTTATTACTCCGGAAGATGGCAGTAAAGATGTGTTCGTGCACTTCTCTGCGATTCAGAGTGATGACTTCCGCACGCTGCACGAAAACCAAAAAGTTGAATTTGCTGTTGAAAATGGTGCCAAAGGCCCTTCAGCAGTAAATGTAGTGGCGCTCTGA
GCF_003019925.1_WP_043084851.1	MEMGTVKWFNNAKGFGFICPEGGGEDIFAHYSTIQMDGYRTLKAGQAVRFDIHQGPKGNHASVIVPVLEAETAA	ATGGAAATGGGTACAGTTAAGTGGTTTAACAATGCCAAAGGGTTTGGCTTTATATGCCCTGAAGGCGGCGGCGAAGATATTTTCGCCCATTATTCAACTATCCAGATGGATGGTTACAGAACGCTAAAAGCCGGGCAGGCCGTCCGGTTCGATATTCACCAGGGGCCGAAAGGCAATCACGCCAGCGTGATTGTGCCCGTACTGGAAGCTGAAACTGCCGCATAG
GCF_003019965.1_WP_004196460.1	MATGIVKWFNDAKGFGFITPDEGGEDLFAHFSAINMQGFKTLKEGQKVSFEVVQGPKGKQASNIQAA	ATGGCAACTGGTATTGTCAAATGGTTCAACGACGCAAAGGGCTTCGGTTTCATCACTCCCGACGAGGGCGGTGAAGACCTGTTCGCGCACTTCTCGGCGATCAACATGCAGGGTTTCAAGACCCTGAAGGAAGGCCAGAAGGTGAGCTTCGAAGTCGTCCAAGGACCGAAGGGCAAGCAAGCTTCGAATATCCAGGCCGCCTGA
GCF_003019965.1_WP_006400508.1	MATGTVKWFNDAKGFGFITPEGGGDDLFAHFSEIRVEGFKTLQENQKVEFEVKTGPKGLQAANIRPL	ATGGCAACCGGTACCGTCAAGTGGTTCAATGACGCAAAGGGCTTCGGCTTCATCACCCCGGAAGGCGGCGGCGACGATCTGTTCGCGCACTTCTCGGAAATCCGCGTCGAAGGTTTCAAGACGCTGCAAGAAAACCAGAAGGTCGAATTCGAAGTGAAGACGGGCCCGAAGGGTCTGCAAGCTGCGAACATCCGCCCGCTGTAA
GCF_003028855.1_WP_107141363.1	MATGTVKWFNDSKGFGFITPDDGGEDLFAHFSAINMNGFKTLKEGQKVQFEVTQGPKGKQASNIQAS	ATGGCAACAGGTACCGTTAAGTGGTTCAATGACTCCAAAGGTTTTGGCTTCATCACTCCTGATGATGGCGGCGAGGATTTGTTCGCACACTTCTCCGCAATCAACATGAACGGCTTCAAGACCCTGAAAGAAGGTCAGAAGGTGCAGTTCGAAGTCACGCAAGGCCCTAAAGGCAAGCAAGCTTCCAACATCCAGGCGAGCTGA
GCF_003028855.1_WP_107142119.1	MATGIVKWFNDSKGFGFITPDEGGEDLFAHFSAIQTTGFKSLQENQRVSFEVTAGPKGKQASNIQPL	ATGGCAACTGGTATCGTAAAATGGTTCAATGATTCGAAGGGTTTTGGCTTCATCACCCCTGACGAAGGCGGCGAAGATCTGTTCGCTCACTTCTCGGCGATCCAAACCACCGGCTTCAAATCTCTGCAAGAGAACCAACGCGTATCTTTCGAAGTGACCGCTGGTCCGAAAGGCAAGCAAGCTTCGAACATTCAGCCTCTGTAA
GCF_003049605.2_WP_004230088.1	MKQGTVKWFNSEKGFGFIEVEGENDVFVHFSAIQGEGFKTLDEGQKVEFEVVDGNRGPQAANVTKL	ATGAAACAAGGTACAGTAAAATGGTTTAACTCAGAAAAAGGTTTTGGATTCATCGAAGTGGAAGGCGAAAACGACGTATTCGTACACTTCTCAGCTATCCAAGGCGAAGGTTTCAAAACTCTTGACGAAGGTCAAAAAGTGGAATTCGAAGTTGTAGATGGCAACCGCGGACCACAAGCTGCTAACGTAACTAAACTTTAA
GCF_003049605.2_WP_010859201.1	MTQGTVKWFNAEKGFGFIEVEGGNDVFVHFSAIQSEGFKTLEEGQKVEFGVEEGNRGPQATNVVKL	ATGACACAAGGTACAGTAAAATGGTTTAACGCAGAAAAAGGTTTTGGCTTCATCGAAGTAGAAGGTGGAAACGATGTATTCGTACACTTCTCTGCTATCCAATCTGAAGGTTTCAAAACACTAGAAGAAGGTCAAAAAGTAGAATTCGGCGTTGAAGAAGGCAACCGTGGCCCTCAAGCTACTAACGTTGTGAAACTTTAA
GCF_003063625.1_WP_108603653.1	MATGKVKWFNNAKGFGFIVPDDMKEEQDVFAHYSTITMDGYRTLKAGQEVEFDLTEGPKGLHATNIKLPGQVK	ATGGCGACTGGTAAAGTTAAGTGGTTCAACAACGCTAAAGGCTTTGGCTTTATTGTTCCTGATGATATGAAAGAAGAGCAAGATGTATTTGCGCACTATTCAACTATCACAATGGACGGCTACAGAACGCTTAAGGCAGGTCAAGAAGTAGAGTTTGATCTGACTGAAGGGCCAAAAGGGTTACACGCAACAAATATTAAACTTCCAGGCCAAGTAAAATAA
GCF_003065605.1_WP_056607991.1	MATGTVKWFNADKGFGFIAPDDGSEDVFAHFSAIQTSGYRSLNENQKVEFDVEQGQKGLQAANIRPL	ATGGCAACAGGCACGGTCAAGTGGTTCAACGCCGACAAGGGCTTCGGCTTCATCGCCCCCGACGACGGCAGCGAGGACGTGTTCGCGCACTTCTCCGCGATCCAGACGAGCGGCTACCGCTCGCTGAACGAGAACCAGAAGGTCGAGTTCGACGTGGAGCAGGGCCAGAAGGGTCTGCAGGCGGCGAACATCCGTCCGCTCTGA
GCF_003074995.2_WP_004094893.1	MAKIKGQVKWFNEAKGFGFITPADGSKDVFVHFSAIQGNGFKTLAEGQHVEFEIQDGQKGPSAVNVTAI	ATGGCTAAGATCAAAGGTCAAGTGAAGTGGTTCAACGAAGCGAAGGGTTTCGGTTTCATCACCCCGGCTGACGGCAGCAAGGACGTGTTCGTTCACTTCTCTGCAATCCAGGGCAACGGTTTCAAAACTCTGGCTGAAGGTCAGCACGTAGAGTTCGAAATCCAGGATGGCCAGAAAGGTCCGTCTGCTGTTAACGTAACTGCTATCTAA
GCF_003074995.2_WP_005296986.1	MSKKTGQVKWFNESKGFGFIEQHDGGKDVFVHFSAITGDGFKTLAEGQRVEYTIQDSPRGPAAANVVAL	ATGTCTAAGAAGACTGGTCAGGTAAAGTGGTTCAACGAAAGCAAAGGCTTCGGCTTTATCGAGCAGCATGACGGCGGTAAAGATGTATTCGTACATTTCTCTGCCATCACCGGTGACGGTTTCAAAACGTTGGCTGAAGGCCAGCGTGTAGAGTACACCATTCAGGACAGCCCGCGCGGGCCGGCTGCCGCCAACGTTGTTGCGCTGTAA
GCF_003074995.2_WP_012848159.1	MSNKMTGLVKWFNADKGFGFITPDNGGSDIFVHFSAIQSNGYKSLDEGQKVAFEVQTGAAKGPSAINVTPL	ATGTCTAATAAAATGACTGGCTTAGTAAAATGGTTCAATGCGGATAAAGGCTTTGGCTTCATCACGCCGGATAACGGCGGCAGCGATATCTTTGTTCATTTTTCCGCGATTCAAAGCAATGGCTACAAATCCCTGGATGAAGGCCAGAAGGTTGCATTCGAGGTACAAACCGGTGCTGCTAAAGGGCCGTCAGCCATTAATGTAACCCCGCTGTAA
GCF_003074995.2_WP_015871187.1	MSKKNGQVKWFNESKGFGFITPADGSKDVFVHFSAIQSDGFKTLAEGQQVEFSIQDSPRGPAAADVIAL	ATGAGCAAGAAAAACGGTCAGGTCAAATGGTTTAACGAAAGCAAGGGATTTGGTTTCATCACGCCCGCAGATGGTTCCAAAGATGTCTTCGTCCATTTTTCTGCCATCCAGAGCGATGGGTTCAAGACCCTGGCAGAAGGTCAGCAGGTCGAGTTCTCTATCCAGGACTCCCCGCGTGGCCCGGCCGCCGCTGATGTGATTGCGCTGTAA
GCF_003074995.2_WP_015871775.1	METGTVKWFNNAKGFGFICPASGGDDIFAHYTAIQMEGYRTLKAGQQVQFDLHTGPKGNHANTIIPILSEPAS	ATGGAGACGGGTACTGTAAAGTGGTTTAACAACGCCAAAGGCTTTGGCTTTATCTGCCCGGCCAGCGGCGGCGACGATATATTCGCCCATTACACCGCCATTCAGATGGAGGGATACCGCACGCTGAAGGCGGGTCAACAGGTTCAGTTTGACCTTCATACCGGCCCCAAGGGCAATCACGCCAACACCATAATCCCCATTCTCAGCGAGCCGGCTTCCTAA
GCF_003096015.2_WP_047780981.1	MSKKTGKVKWFNESKGFGFIEQDDGGKDVFVHFSAIASEGFKTLAEGQKVEYTIQDSPRGPAAANVVAL	ATGTCCAAGAAAACTGGCAAAGTTAAATGGTTCAATGAAAGTAAAGGTTTTGGTTTTATTGAGCAAGATGACGGTGGTAAAGACGTATTCGTTCACTTCTCTGCTATCGCTAGTGAAGGTTTTAAAACTTTGGCCGAAGGCCAGAAAGTTGAATATACCATTCAAGACAGCCCACGCGGTCCAGCAGCTGCAAACGTTGTTGCTCTGTAA
GCF_003096015.2_WP_108899468.1	MSKKTGHVKWFNESKGFGFITPTDGSKDVFVHFSAIVNDGFKTLAEGQHVEFSIQDSPRGPSAAEVVSL	ATGTCTAAGAAAACTGGTCACGTTAAGTGGTTCAACGAAAGTAAAGGTTTTGGTTTCATCACTCCAACTGATGGCAGCAAAGATGTGTTCGTTCATTTCTCTGCTATCGTTAATGATGGTTTCAAAACTCTGGCTGAAGGCCAGCATGTTGAATTTTCTATTCAAGACAGCCCACGTGGCCCGTCTGCGGCTGAAGTTGTTTCTCTGTAA
GCF_003096015.2_WP_108899827.1	MSNTMTGLVKWFNSDKGFGFISPKDGSKDVFVHYSAIQGTNFKTLEEGQEVSFSIENGAKGPSAVNVVAC	ATGTCTAATACAATGACTGGTTTAGTAAAATGGTTTAACAGCGATAAAGGTTTTGGTTTTATCTCTCCTAAAGATGGTAGCAAAGATGTATTCGTACATTATTCAGCTATTCAGGGTACAAACTTCAAAACTTTAGAAGAAGGTCAAGAAGTATCTTTCTCTATCGAGAATGGTGCTAAAGGCCCATCAGCGGTTAACGTTGTTGCTTGCTAA
GCF_003096215.1_WP_034770502.1	MNQGKVKWFNTEKGFGFIEVDGGNDVFVHYSAIQGDGFKTLEEGQSVSFDIVEGNRGPQAANVVRL	ATGAATCAAGGTAAAGTAAAATGGTTTAACACAGAAAAAGGTTTCGGATTCATCGAAGTAGACGGCGGAAATGATGTATTTGTACATTATTCAGCTATTCAAGGTGATGGATTCAAAACATTAGAAGAAGGGCAATCTGTTTCTTTTGATATCGTTGAAGGTAACCGTGGACCACAAGCTGCTAACGTTGTAAGACTATAA
GCF_003096215.1_WP_034770549.1	MQNGKVKWFNNEKGYGFIEVEGGNDVFVHFTAIQGDGYKTLEEGQEVSFDIVEGNRGPQAANVVKL	ATGCAAAACGGTAAAGTAAAATGGTTTAACAATGAAAAAGGCTATGGTTTTATTGAAGTTGAAGGTGGAAATGATGTATTTGTACACTTCACCGCCATTCAAGGTGACGGGTACAAAACACTGGAAGAAGGGCAAGAAGTTTCTTTTGACATTGTGGAAGGAAATCGTGGACCTCAAGCAGCTAATGTTGTGAAATTATAA
GCF_003099975.1_WP_009874442.1	MSKIKGNVKWFNESKGFGFITPEDGSKDVFVHFSAIQSNGFKTLAEGQSVEFEITEGAKGPSAANVISL	ATGTCCAAGATTAAAGGTAATGTTAAGTGGTTTAATGAGTCTAAAGGGTTTGGTTTTATTACTCCAGAAGATGGAAGTAAAGATGTATTTGTTCACTTCTCAGCTATACAAAGTAATGGATTTAAAACTCTAGCAGAAGGTCAAAGTGTTGAATTTGAAATTACTGAGGGAGCAAAGGGGCCATCTGCTGCTAATGTTATTAGTCTATAG
GCF_003122425.1_WP_072549561.1	MAKIKGQVKWFNESKGFGFITPDDGSKDVFVHFSAIQGNGFKTLAEGQKVEFEIQDGQKGPSAANVYAV	ATGGCAAAGATAAAAGGTCAAGTTAAGTGGTTCAACGAGTCTAAGGGGTTTGGTTTTATTACGCCAGATGATGGCAGTAAAGATGTGTTTGTACACTTCTCTGCAATTCAGGGTAACGGGTTTAAAACTTTAGCGGAAGGCCAGAAGGTAGAATTTGAGATCCAGGATGGGCAGAAAGGCCCTTCCGCAGCAAATGTTTATGCTGTCTGA
GCF_003122425.1_WP_072550319.1	MSDTKKGSVKWFNESKGFGFITPEDGSKDVFVHFSAIKSDGFKTLAEGQQVQFTIENGAKGPSAANVTTD	ATGTCTGATACAAAAAAAGGCTCAGTAAAGTGGTTCAACGAGTCTAAAGGTTTTGGTTTTATTACACCAGAAGACGGTAGCAAAGATGTCTTCGTGCACTTTTCTGCAATCAAGAGCGATGGCTTTAAAACCTTAGCTGAAGGGCAACAGGTACAGTTTACTATCGAAAACGGTGCTAAAGGTCCATCTGCAGCAAACGTCACTACTGATTGA
GCF_003143515.1_WP_005670341.1	MATGIVKWFNDSKGFGFITPDEGGEDLFAHFSAIQSTGFKSLQENQRVSFDVTTGPKGKQASNIQPL	ATGGCAACTGGCATCGTTAAATGGTTCAATGACTCGAAGGGCTTCGGCTTCATCACCCCTGATGAAGGCGGCGAAGATCTGTTCGCGCACTTCTCGGCTATCCAGAGCACCGGCTTCAAGTCGCTGCAGGAAAACCAGCGCGTTTCGTTCGACGTGACCACCGGCCCTAAGGGCAAGCAAGCCTCGAACATCCAGCCTCTGTAA
GCF_003143515.1_WP_020653506.1	MATGTVKWFNDSKGFGFITPDDGGEDLFAHFSAINMNGFKTLKEGQKVQFEVTQGPKGKQASNIQGM	ATGGCAACTGGTACTGTTAAGTGGTTCAATGATTCCAAAGGCTTTGGCTTCATCACTCCTGATGACGGCGGCGAGGATCTGTTTGCTCACTTCTCCGCGATCAACATGAACGGTTTTAAGACCCTCAAAGAAGGTCAAAAAGTCCAATTCGAAGTCACGCAAGGCCCTAAAGGCAAGCAAGCTTCCAACATCCAGGGCATGTAA
GCF_003143555.1_WP_109338833.1	MSQSTGTVKWFNEDKGFGFITQDDGGKDVFVHFRSIQGDGFKTLAEGQAVTFTVEQGQKGLQAANVVPA	ATGTCTCAATCTACCGGTACTGTTAAGTGGTTCAACGAAGATAAAGGTTTTGGTTTTATTACTCAGGACGACGGCGGTAAGGACGTATTCGTTCATTTCCGTTCTATCCAGGGTGACGGTTTCAAGACTCTGGCTGAAGGCCAGGCAGTAACCTTCACTGTTGAACAAGGCCAAAAAGGTCTGCAGGCGGCTAACGTAGTTCCGGCGTAA
GCF_003143555.1_WP_109339694.1	MAVGKVKWFNNAKGFGFIVPEEGGEDIFAHYSTIQMDGYRSLKAGQEVSYEVQEGPKGLHAENIEINGEPQR	ATGGCAGTTGGCAAAGTTAAATGGTTTAACAACGCGAAGGGGTTCGGCTTTATCGTGCCTGAGGAAGGCGGTGAAGACATTTTTGCACACTATTCTACGATTCAGATGGACGGATATCGCTCCCTGAAAGCCGGTCAAGAAGTCAGTTATGAGGTGCAAGAAGGTCCCAAGGGCCTGCACGCCGAAAACATCGAAATCAACGGTGAGCCTCAGCGTTAA
GCF_003204135.1_WP_004257099.1	MSKVKGNVKWFNESKGFGFITPEDGSKDVFVHFSAIMGDGFKTLAEGQKVEFEITEGAKGPSAANVIPL	ATGTCTAAAGTTAAAGGTAACGTTAAGTGGTTCAACGAATCTAAAGGTTTTGGTTTTATCACTCCAGAAGATGGTAGCAAAGATGTATTTGTTCACTTTTCTGCGATTATGGGCGATGGTTTCAAAACCTTAGCTGAAGGCCAAAAAGTGGAATTTGAAATTACTGAAGGTGCTAAAGGCCCATCTGCTGCTAACGTTATTCCTCTGTAA
GCF_003204135.1_WP_004909408.1	METGIVKWFNNAKGFGFICPADGGEDIFAHYSCIQMDGYRTLKAGQKVQFSVTIGPKGNHADLIVPINTEDVPDNITELNQ	ATGGAGACGGGTATCGTTAAGTGGTTCAATAACGCAAAAGGCTTTGGTTTTATTTGCCCGGCTGATGGCGGAGAAGATATTTTTGCTCATTATTCCTGTATTCAAATGGACGGTTACAGGACACTAAAAGCTGGCCAGAAAGTTCAATTTAGTGTGACTATTGGCCCAAAAGGTAATCATGCAGACCTCATTGTTCCTATTAACACTGAGGATGTCCCAGACAACATTACCGAATTAAATCAATAG
GCF_003204135.1_WP_004909801.1	MSDKMKGQVKWFNESKGFGFITPADGSKDVFVHFSAIQGNGFKTLAEGQQVEFTIENGAKGPAAANVTAI	ATGTCCGACAAAATGAAAGGTCAAGTTAAGTGGTTCAACGAGTCTAAAGGCTTCGGTTTCATCACTCCAGCTGATGGTAGCAAAGACGTTTTCGTCCACTTCTCTGCCATTCAGGGCAATGGTTTCAAAACTCTGGCTGAAGGTCAGCAAGTTGAATTCACCATTGAAAACGGTGCAAAAGGCCCAGCAGCTGCTAACGTAACTGCTATCTAA
GCF_003204135.1_WP_004909940.1	MSNTMTGTVKWFNDDKGFGFITPADGSKDVFVHFSAIQSDNFKSLAEGQQVSFSIENGAKGPAAANVIAK	ATGTCTAATACAATGACTGGTACAGTAAAATGGTTTAACGATGATAAAGGTTTTGGTTTTATCACTCCTGCAGACGGCAGCAAAGATGTATTTGTTCACTTTTCTGCAATTCAAAGTGATAACTTCAAATCATTAGCAGAAGGCCAACAAGTTTCATTCAGCATCGAAAATGGTGCTAAAGGCCCAGCAGCAGCTAACGTTATCGCTAAATAA
GCF_003261575.2_WP_001062678.1	MAKIKGQVKWFNESKGFGFITPADGSKDVFVHFSAIQGNGFKTLAEGQNVEFEIQDGQKGPAAVNVTAI	ATGGCAAAGATTAAAGGTCAAGTTAAGTGGTTCAACGAGTCTAAAGGTTTTGGTTTCATTACTCCTGCTGATGGCAGCAAAGATGTGTTCGTACACTTCTCTGCAATCCAGGGTAACGGCTTCAAAACTCTGGCTGAAGGCCAGAACGTTGAGTTCGAAATCCAGGACGGCCAGAAAGGTCCAGCAGCAGTTAACGTAACTGCTATCTGA
GCF_003261575.2_WP_004100146.1	MSKIKGNVKWFNESKGFGFITPEDGSKDVFVHFSAIQSNGFKTLAEGQRVEFEITNGAKGPSAANVMPI	ATGTCTAAGATTAAAGGTAACGTTAAGTGGTTTAATGAGTCCAAAGGATTCGGTTTCATTACTCCGGAAGATGGCAGCAAAGATGTATTCGTACATTTCTCTGCAATCCAGTCCAACGGTTTCAAAACTCTGGCTGAAGGTCAGCGTGTAGAGTTCGAAATCACTAACGGTGCCAAAGGCCCTTCTGCTGCAAACGTAATGCCTATCTAA
GCF_003261575.2_WP_110275216.1	MEMGTVKWFNNAKGFGFICPEGGGEDIFAHYSTIQMDGYRTLKAGQAVRFDVHQGPKGNHASVIVPVEVEETETAA	ATGGAAATGGGTACTGTTAAGTGGTTCAACAATGCCAAAGGGTTCGGTTTTATTTGCCCTGAGGGCGGCGGCGAAGACATTTTCGCCCATTACTCCACCATCCAGATGGATGGTTACAGAACGCTAAAAGCCGGACAAGCCGTTCGGTTTGATGTTCACCAGGGGCCAAAAGGTAATCACGCCAGCGTGATTGTCCCTGTAGAAGTAGAAGAAACGGAAACGGCCGCATAA
GCF_003261575.2_WP_110276250.1	MSGKMTGIVKWFNADKGFGFITPDDGSKDVFVHFSAIQNEGYKSLDEGQKVSFTIESGAKGPAAGNVNSL	ATGTCCGGTAAAATGACTGGTATCGTAAAATGGTTCAACGCTGACAAAGGTTTCGGCTTCATCACTCCTGACGATGGTTCTAAAGACGTGTTCGTACACTTCTCTGCTATCCAGAACGAAGGCTACAAATCTCTGGATGAAGGTCAGAAAGTTTCCTTCACCATCGAAAGCGGCGCTAAAGGCCCGGCAGCTGGTAACGTAAACAGCCTGTAA
GCF_003261575.2_WP_112213481.1	MFQKMTGIVKTFDSKTGKGLIIPSDGRKDVQVHISALSPGESTTIRPGIRVEFRRVNGLCGPTAANVYLS	TTGTTCCAAAAAATGACAGGTATTGTCAAAACATTTGATAGTAAAACAGGCAAAGGTCTGATAATCCCCTCCGATGGTCGTAAAGACGTTCAGGTTCATATTTCCGCATTATCCCCCGGTGAGTCAACCACAATCCGTCCCGGTATTCGCGTAGAGTTTCGTCGAGTAAACGGACTGTGTGGTCCGACCGCCGCGAATGTTTATCTTTCCTGA
GCF_003268595.1_WP_112180617.1	MAQGTVKWFNADKGFGFIEVEGQDDVFVHFSAIQGEGFKTLEEGQTVTFDIEEGNRGPQAANVEKN	ATGGCACAAGGAACAGTAAAATGGTTTAACGCAGACAAAGGTTTTGGATTTATCGAAGTAGAAGGACAAGACGATGTATTCGTTCACTTCTCTGCAATTCAAGGCGAAGGCTTTAAGACACTTGAAGAGGGTCAAACTGTAACATTCGACATCGAAGAAGGCAACCGTGGACCACAAGCTGCTAACGTTGAAAAAAACTAA
GCF_003286395.1_WP_017776809.1	MATGTVKWFNDAKGFGFITPDEGGEDLFAHFSAIQMNGFKTLKEGQKVSFEVVQGPKGKQASNIQAAA	ATGGCAACCGGTACGGTCAAGTGGTTCAACGACGCGAAGGGTTTCGGATTCATCACGCCGGATGAAGGCGGTGAGGATTTGTTCGCTCACTTTTCGGCCATCCAGATGAATGGCTTCAAGACCCTCAAAGAAGGTCAGAAGGTGAGCTTCGAGGTCGTGCAAGGCCCGAAGGGTAAGCAGGCATCGAACATTCAGGCAGCGGCCTGA
GCF_003286395.1_WP_027797379.1	METGTVKWFNDAKGFGFITPDGGGEDLFAHFSEIKVDGFKTLQENQKVQFEVRTGPKGKQAANIKPV	ATGGAAACCGGTACCGTCAAGTGGTTCAATGACGCTAAGGGCTTTGGCTTTATCACCCCGGACGGCGGTGGCGAAGATCTGTTCGCGCACTTCTCGGAAATCAAGGTTGACGGCTTCAAGACGCTGCAAGAGAACCAAAAGGTTCAATTCGAAGTCCGCACGGGCCCGAAGGGCAAGCAAGCTGCAAACATCAAGCCGGTCTAA
GCF_003288115.1_WP_004050761.1	MEQGTVKWFNADKGFGFITREDGSDVFVHFSAIQGEGFKTLDEGQHVTFDVEESERGPQAANVVKD	ATGGAACAAGGAACAGTTAAATGGTTTAACGCTGATAAAGGTTTTGGCTTTATCACACGCGAAGATGGTAGCGACGTATTCGTACACTTCTCAGCTATCCAAGGTGAAGGCTTCAAGACTTTAGATGAAGGCCAACACGTAACTTTCGATGTTGAAGAAAGCGAACGCGGACCACAAGCTGCTAACGTAGTAAAAGACTAA
GCF_003330785.1_WP_007180251.1	METGTVKWFNDAKGFGFITPDGGGEDLFAHFSEIRTEGFKTLQENQKVTFEVKTGPKGKQAANIKPV	ATGGAAACCGGTACCGTCAAGTGGTTCAATGACGCAAAGGGCTTTGGCTTCATCACCCCGGACGGCGGCGGCGAAGATCTGTTCGCGCATTTCTCGGAAATCCGCACGGAAGGCTTCAAGACGCTGCAAGAAAACCAAAAGGTTACGTTTGAAGTGAAGACGGGCCCGAAGGGCAAGCAAGCAGCTAACATCAAGCCGGTGTAA
GCF_003330785.1_WP_007180614.1	MATGTVKWFNDAKGFGFITPDEGGEDLFAHFSAIQMNGFKTLKEGQKVTFEVVQGPKGKQASNIQAPA	ATGGCAACTGGTACGGTCAAATGGTTCAATGACGCAAAAGGTTTCGGATTCATCACGCCGGATGAAGGCGGCGAGGATCTGTTTGCACACTTCTCGGCCATCCAGATGAATGGGTTCAAGACCCTCAAGGAAGGCCAAAAGGTGACCTTCGAGGTCGTGCAAGGCCCGAAGGGCAAGCAGGCATCGAACATCCAGGCACCCGCCTGA
GCF_003330825.1_WP_007180251.1	METGTVKWFNDAKGFGFITPDGGGEDLFAHFSEIRTEGFKTLQENQKVTFEVKTGPKGKQAANIKPV	ATGGAAACCGGTACCGTCAAGTGGTTCAATGACGCAAAGGGCTTTGGCTTCATCACGCCGGACGGCGGCGGCGAAGATCTGTTCGCGCATTTCTCGGAAATCCGCACGGAAGGCTTCAAGACGCTGCAAGAAAACCAAAAGGTCACGTTTGAAGTGAAGACGGGCCCGAAGGGCAAGCAAGCTGCCAACATCAAGCCGGTGTAA
GCF_003330825.1_WP_007180614.1	MATGTVKWFNDAKGFGFITPDEGGEDLFAHFSAIQMNGFKTLKEGQKVTFEVVQGPKGKQASNIQAPA	ATGGCAACTGGTACGGTCAAATGGTTCAATGACGCAAAAGGTTTCGGATTCATCACGCCTGACGAGGGTGGTGAGGATCTGTTTGCACACTTCTCGGCCATCCAGATGAATGGGTTCAAAACCCTCAAGGAAGGTCAAAAGGTGACCTTCGAGGTCGTGCAAGGCCCGAAAGGCAAACAGGCATCGAACATCCAGGCACCTGCCTGA
GCF_003336365.1_WP_090399353.1	MKGTVKWFNAEKGFGFIEREDGDDVFVHFSAIQAEGFKTLDDGETVEFEIVEGDRGPQAANVIRQ	ATGAAAGGCACAGTAAAATGGTTTAATGCAGAAAAAGGGTTTGGATTTATCGAACGGGAGGACGGAGATGACGTATTCGTTCACTTTTCCGCGATCCAAGCCGAAGGGTTCAAAACGTTGGACGATGGCGAGACAGTAGAATTTGAAATTGTTGAAGGAGATCGTGGCCCGCAAGCGGCTAACGTTATACGTCAATAG
GCF_003339525.1_WP_114563032.1	MATGTVKWFNNSKGFGFITPDGGGEDLFAHFSSITMDGYKTLREEQRVSFDIVDGPKGKQAANIKEA	ATGGCTACCGGTACAGTAAAATGGTTTAATAATAGCAAGGGTTTTGGCTTCATTACTCCTGATGGCGGCGGCGAAGACTTGTTCGCGCACTTTTCTTCAATCACAATGGACGGTTACAAAACATTGCGTGAAGAACAACGCGTTAGCTTTGACATCGTTGATGGCCCTAAAGGCAAACAAGCTGCAAACATCAAAGAAGCGTAA
GCF_003343305.1_WP_010745638.1	MEQGTVKWFNSEKGYGFITAENGNDVFVHFSAIQGDGFKTLEEGQAVTFDVEEGQRGPQATNVNKA	ATGGAACAAGGTACAGTAAAATGGTTCAACTCAGAAAAAGGCTACGGATTTATCACTGCTGAAAACGGAAATGACGTATTCGTACATTTCTCAGCTATCCAAGGCGACGGCTTCAAAACTTTAGAAGAAGGTCAAGCAGTGACTTTCGACGTAGAAGAAGGCCAACGTGGACCTCAAGCTACAAACGTTAACAAAGCTTAA
GCF_003343305.1_WP_010781607.1	MENGTVKWFNAEKGFGFITREDGSDVFVHFSAIQGDGFKTLEEGQAVTFDVEESDRGPQAANVNKQ	ATGGAAAACGGAACAGTAAAATGGTTTAACGCAGAAAAAGGTTTTGGCTTCATCACTCGTGAAGATGGCAGCGATGTATTCGTACATTTCTCAGCTATCCAAGGCGACGGCTTCAAAACATTAGAAGAAGGACAAGCAGTAACTTTCGATGTTGAAGAAAGCGATCGCGGACCTCAAGCAGCTAACGTGAATAAGCAATAA
GCF_003345255.1_WP_102041065.1	MATGTVKWFNDAKGFGFITPDDGSEDLFAHFSAINMGGFKTLKEGEKVSFEVTQGPKGKQASNIQRL	ATGGCAACTGGCACTGTGAAGTGGTTCAACGACGCTAAAGGTTTTGGCTTCATCACCCCGGACGACGGCAGCGAAGATTTGTTCGCGCACTTTTCCGCAATCAATATGGGTGGGTTCAAGACCCTCAAGGAAGGCGAAAAGGTTTCCTTTGAAGTCACCCAGGGCCCCAAAGGCAAGCAAGCTTCCAACATCCAAAGGCTGTAA
GCF_003351545.1_WP_003770035.1	MATGTVKWFNDAKGFGFITPDEGGDDLFAHFSAINMEGFKTLKEGQKVSFDVTSGPKGLQAANIQAA	ATGGCAACCGGTACTGTTAAATGGTTTAACGATGCAAAAGGCTTTGGTTTTATCACTCCTGATGAAGGCGGCGATGATTTGTTCGCACATTTCTCTGCCATCAACATGGAAGGCTTCAAAACCCTGAAAGAAGGCCAAAAAGTTTCTTTTGATGTTACCAGCGGCCCCAAAGGCCTTCAGGCTGCAAACATCCAGGCGGCTTAA
GCF_003351565.1_WP_002217533.1	MATGIVKWFNDAKGFGFITPDEGGEDLFAHFSAINMEGFKTLKEGQRVSFDVTTGPKGKQAANIQAA	ATGGCAACCGGTATCGTAAAATGGTTTAACGACGCTAAAGGTTTTGGTTTCATCACGCCTGACGAAGGCGGCGAAGATTTGTTCGCTCACTTCTCCGCAATCAATATGGAAGGTTTCAAAACCCTGAAAGAAGGCCAACGCGTCTCTTTCGACGTAACCACCGGCCCTAAAGGCAAACAAGCCGCTAACATTCAGGCTGCTTAA
GCF_003352005.1_WP_010651786.1	MTGKVKWFNAEKGFGFIEREDGDDVFVHFSAIQADGFKTLEEGQEVEFEIVEGNRGPQAANVTRL	ATGACTGGTAAAGTAAAATGGTTTAATGCAGAAAAAGGTTTCGGTTTCATCGAGCGCGAAGACGGAGACGATGTATTCGTACATTTCTCAGCAATCCAAGCTGATGGTTTCAAAACTCTTGAAGAAGGTCAAGAAGTTGAGTTTGAAATCGTTGAAGGTAACCGTGGACCACAAGCTGCTAATGTAACTCGCTTATAA
GCF_003352005.1_WP_114915772.1	MNTGSVKWFNADKGFGFIEIEGGDDVFVHFSAIQGDGFKTLEEGQQVSFDIEEGNRGPQATNVVK	ATGAATACAGGTTCAGTAAAATGGTTTAACGCAGACAAAGGTTTCGGTTTCATCGAAATTGAAGGTGGAGACGATGTATTCGTACACTTCTCGGCAATTCAAGGCGACGGCTTTAAAACTTTAGAAGAAGGTCAACAAGTTTCTTTCGATATCGAAGAAGGTAACCGTGGACCTCAGGCAACTAACGTTGTTAAATAA
GCF_003352005.1_WP_114915836.1	MSKGTVKWFNADKGFGFIEVEGGDDVFVHFSAIQGEGFKSLDEGQEVTFDIEEGNRGPQAANVVKA	ATGAGCAAAGGTACAGTAAAATGGTTTAACGCAGATAAAGGTTTCGGTTTCATCGAAGTTGAAGGTGGAGACGACGTATTCGTACATTTCTCTGCAATCCAAGGTGAAGGTTTCAAATCTTTAGACGAAGGTCAAGAAGTAACTTTCGATATCGAAGAAGGTAACCGTGGACCACAAGCAGCTAACGTTGTTAAAGCGTAA
GCF_003352005.1_WP_114917663.1	MSKGTVKWFNADKGFGFIEVEGGEDVFVHFSAIQSEGFKSLDEGQEVTFDIEEGNRGPQAANVEKA	ATGAGTAAAGGTACAGTAAAATGGTTTAACGCAGACAAAGGCTTCGGTTTTATCGAAGTTGAAGGTGGAGAAGATGTATTCGTACATTTCTCAGCAATTCAAAGCGAAGGTTTCAAATCATTAGATGAAGGCCAAGAAGTTACTTTTGATATTGAAGAAGGTAACCGTGGACCACAAGCTGCAAACGTTGAAAAAGCGTAA
GCF_003352005.1_WP_114918408.1	MNTGTVKWFNADKGFGFIEVEGGEDVFVHFTAIQGDGFKSLDEGQQVSFDIEEGNRGPQATNVVKL	ATGAACACAGGTACAGTAAAATGGTTTAACGCAGATAAAGGTTTCGGTTTCATCGAAGTTGAAGGTGGAGAGGATGTATTCGTACACTTCACAGCAATTCAAGGCGACGGTTTCAAAAGCTTAGATGAAGGTCAACAAGTTTCTTTCGATATTGAAGAAGGTAACCGTGGACCACAAGCAACAAACGTTGTTAAATTATAA
GCF_003367375.1_WP_115718503.1	MAIGTVKWFNNAKGFGFICPDGGGEDVFAHYSTIQMDGYRTLKAGQEVNFDMSQGPKGFHAVNIRPQEK	ATGGCTATTGGAACAGTCAAATGGTTTAACAACGCCAAAGGGTTCGGTTTTATTTGTCCTGACGGGGGCGGCGAGGATGTTTTCGCTCACTACTCGACCATTCAAATGGACGGCTACCGAACGCTTAAAGCAGGCCAGGAAGTTAACTTCGACATGAGCCAGGGTCCCAAGGGCTTTCACGCTGTGAACATTCGCCCTCAAGAAAAATAA
GCF_003368325.1_WP_007180251.1	METGTVKWFNDAKGFGFITPDGGGEDLFAHFSEIRTEGFKTLQENQKVTFEVKTGPKGKQAANIKPV	ATGGAAACCGGTACCGTCAAGTGGTTCAATGACGCAAAGGGCTTTGGCTTCATCACGCCGGACGGCGGCGGCGAAGATCTGTTCGCGCATTTCTCGGAAATCCGCACGGAAGGCTTCAAGACGCTGCAAGAAAACCAAAAGGTTACGTTTGAAGTGAAGACGGGCCCGAAGGGCAAGCAAGCTGCCAACATCAAGCCGGTGTAA
GCF_003368325.1_WP_007180614.1	MATGTVKWFNDAKGFGFITPDEGGEDLFAHFSAIQMNGFKTLKEGQKVTFEVVQGPKGKQASNIQAPA	ATGGCAACTGGTACGGTCAAATGGTTCAATGACGCAAAAGGTTTCGGATTCATCACGCCTGACGAAGGTGGTGAGGATCTGTTTGCACACTTCTCGGCCATCCAGATGAATGGGTTCAAGACCCTCAAGGAAGGTCAAAAAGTAACCTTCGAGGTCGTGCAAGGCCCGAAAGGCAAACAGGCATCGAACATCCAGGCACCTGCCTGA
GCF_003382565.3_WP_005967874.1	MSNKMTGLVKWFDAGKGFGFITPDNGSKDVFVHFSAIQSNDFKTLDEGQKVEFTIENGQKGPSAGNVVAL	ATGTCTAATAAAATGACTGGTTTAGTAAAATGGTTTGACGCTGGTAAAGGTTTTGGTTTCATTACTCCTGACAACGGCAGCAAAGATGTATTCGTACATTTCTCTGCTATTCAGAGCAACGATTTCAAAACGCTGGACGAAGGCCAAAAGGTTGAGTTCACCATTGAAAATGGTCAGAAAGGTCCATCAGCTGGCAACGTTGTCGCACTGTAA
GCF_003382565.3_WP_005968829.1	MAKIKGQVKWFNESKGFGFITPADGSKDVFVHFSAIQGNGFKTLAEGQNVEFEIQDGQKGPSAVNVTAL	ATGGCAAAGATTAAAGGTCAGGTTAAGTGGTTCAATGAGTCTAAAGGCTTTGGTTTCATCACTCCTGCTGACGGCAGCAAAGATGTATTCGTACACTTCTCTGCAATTCAAGGCAACGGCTTCAAAACTCTGGCTGAAGGCCAGAACGTAGAATTCGAAATTCAGGATGGCCAGAAAGGTCCTTCTGCAGTAAACGTCACTGCGCTGTAA
GCF_003382565.3_WP_005976270.1	MSKIKGSVKWFNESKGFGFITPEDGSKDVFVHFSAIQSNGFKTLAEGQRVEFEITDGAKGPSAANVNAI	ATGTCTAAGATTAAAGGTAGTGTTAAGTGGTTCAATGAGTCTAAAGGCTTCGGTTTCATCACTCCTGAAGATGGTAGCAAAGACGTGTTCGTACACTTCTCTGCCATTCAGAGCAATGGTTTCAAAACTCTGGCTGAAGGTCAGCGTGTAGAGTTCGAAATCACTGACGGTGCCAAAGGTCCTTCAGCTGCTAACGTTAACGCTATTTAA
GCF_003382565.3_WP_095699219.1	METGTVKWFNNAKGFGFICPEGGGDDIFAHYSTIQMDGYRTLKAGQVVRFDVHQGPKGNHACLIVPQIAEAVS	ATGGAGACAGGTACTGTTAAATGGTTCAATAACGCCAAAGGGTTTGGTTTTATCTGTCCAGAAGGGGGCGGTGACGATATCTTCGCGCACTACTCAACCATTCAAATGGATGGCTACCGGACTCTGAAAGCCGGGCAGGTTGTCAGGTTTGATGTTCATCAAGGGCCAAAAGGCAATCATGCCTGCCTGATCGTGCCGCAAATCGCCGAGGCCGTATCCTGA
GCF_003391335.1_WP_115955986.1	MAKIKGQVKWFNESKGFGFITPSDGSKDVFVHFSAIQGNGFKTLTEGQNVEFEIQDGQKGPAAVNVVAI	ATGGCAAAAATTAAAGGTCAAGTTAAATGGTTTAATGAATCTAAAGGTTTTGGTTTTATTACTCCTTCTGATGGTAGTAAAGATGTTTTTGTACATTTTTCTGCAATTCAAGGTAATGGTTTTAAAACTTTGACTGAAGGTCAAAATGTTGAATTTGAAATTCAAGATGGTCAGAAAGGACCAGCAGCTGTTAATGTTGTAGCTATATAG
GCF_003403135.1_WP_009113827.1	MSKIKGSVKWFNESKGFGFITPEDGSKDVFVHFSAIQSNGFKTLAEGQRVEFEITSGAKGPSAANVIAI	ATGTCTAAGATTAAAGGTAGCGTTAAGTGGTTTAATGAGTCCAAAGGATTCGGTTTCATTACTCCGGAAGATGGCAGCAAGGACGTATTCGTTCACTTCTCTGCTATCCAGAGCAACGGTTTCAAAACCCTGGCTGAAGGTCAGCGTGTAGAGTTTGAAATCACCAGTGGCGCTAAAGGACCTTCTGCTGCTAACGTTATCGCTATTTAA
GCF_003403135.1_WP_012769694.1	MAKIKGQVKWFNESKGFGFITPADGSKDVFVHFSAIQGNGFKTLAEGQNVEFEIQDGQKGPSAVNVVAL	ATGGCAAAGATTAAAGGTCAGGTTAAGTGGTTCAACGAGTCTAAAGGCTTTGGTTTCATCACTCCGGCTGATGGCAGCAAAGATGTGTTCGTACACTTCTCTGCAATTCAGGGCAACGGCTTTAAAACTTTAGCTGAAGGCCAGAATGTTGAGTTTGAAATTCAGGATGGCCAGAAAGGTCCTTCTGCAGTGAACGTTGTTGCGCTGTAA
GCF_003403135.1_WP_022635207.1	MSNKMTGSVKWFNESKGFGFITPADGSKDVFVHFSAIQSDSFKTLYEGQKVEFVIGNGPKGPSAENVVGL	ATGTCTAATAAAATGACTGGTTCAGTAAAATGGTTTAACGAATCTAAAGGTTTTGGTTTCATCACTCCGGCAGATGGCAGCAAAGACGTGTTCGTTCACTTCTCTGCCATTCAGAGCGATAGCTTCAAGACCCTGTACGAAGGTCAGAAAGTTGAATTCGTTATTGGCAACGGCCCGAAAGGTCCTTCTGCTGAAAACGTCGTAGGGCTGTAA
GCF_003403135.1_WP_024105688.1	METGTVKWFNNAKGFGFICPESGGDDIFAHYSTIQMDGYRTLKAGQVVQFTVHQGPKGNHASLIVPVAGETVA	ATGGAGACAGGTACTGTTAAATGGTTCAATAACGCCAAAGGCTTTGGCTTTATTTGTCCCGAGAGCGGCGGTGATGATATTTTCGCCCACTATTCAACCATTCAGATGGACGGCTACAGGACGCTGAAAGCAGGTCAGGTGGTGCAATTCACCGTACACCAGGGACCAAAAGGAAATCACGCCAGTCTGATCGTGCCGGTAGCCGGTGAAACGGTCGCCTGA
GCF_003410415.1_WP_028393295.1	MVQGKVKWFNAEKGFGFIEVEGQDDVFVHFSAIQGEGFKTLEEGQEVSFEIEQGARGPQAANVQK	ATGGTACAAGGTAAAGTAAAATGGTTTAACGCAGAAAAAGGTTTCGGTTTCATCGAAGTTGAAGGCCAAGACGATGTATTCGTACATTTCTCAGCTATCCAAGGCGAAGGCTTCAAAACTCTTGAAGAAGGCCAAGAAGTTTCTTTCGAAATCGAGCAAGGCGCTCGTGGACCACAAGCAGCTAACGTTCAAAAATAA
GCF_003410415.1_WP_056530714.1	MTVTGKVKWFNSDKGFGFIEVPNEDDVFVHFSAIQGDGFKTLDEGQEVQFEIEEGNRGPQAKNVIKL	ATGACAGTAACAGGTAAAGTAAAATGGTTTAACAGTGACAAAGGGTTTGGATTTATCGAAGTACCAAACGAAGATGATGTATTCGTACATTTTTCTGCAATTCAGGGCGATGGTTTCAAGACTCTTGATGAAGGTCAAGAAGTACAATTTGAAATTGAAGAAGGTAATCGCGGACCTCAAGCTAAGAACGTCATTAAACTATAA
GCF_003429285.1_WP_108567224.1	MAVGKVKWFNNAKGFGFIVPEDGGEDIFAHYSTIQMEGYRSLKAGQDVTFEVQQGPKGLHAENIGLLDEEPER	ATGGCGGTTGGTAAAGTTAAATGGTTTAACAACGCAAAAGGTTTTGGTTTTATCGTCCCGGAAGACGGCGGCGAAGACATTTTTGCTCACTATTCAACCATCCAGATGGAAGGATATCGTTCGTTAAAAGCAGGACAGGATGTTACTTTTGAGGTTCAGCAGGGCCCCAAAGGACTCCACGCCGAAAATATCGGATTGCTTGACGAAGAACCAGAGCGTTAA
GCF_003429285.1_WP_108568737.1	MSKVTGTVKWFNADKGYGFLTQDSGDKDVFVHFRAIVSEGYKTLNEGQRVEFEVEQGQKGLQAANVNAI	ATGTCTAAAGTTACAGGTACCGTTAAGTGGTTTAACGCTGATAAAGGTTATGGTTTTCTAACTCAGGATAGTGGTGATAAGGACGTTTTCGTTCATTTCCGTGCTATCGTGTCAGAAGGCTACAAAACGCTTAACGAAGGTCAACGCGTTGAGTTTGAAGTTGAGCAGGGTCAGAAAGGTCTGCAAGCTGCCAACGTGAATGCTATCTAA
GCF_003515105.1_WP_036968098.1	MACGKVKWFNNAKGFGFIVEDGSETDIFAHYSTIVMDGYKTLKAGQDVTFELQQGPKGLHATNIAPNDEIS	ATGGCTTGTGGTAAAGTCAAATGGTTCAACAATGCCAAAGGTTTTGGTTTCATCGTAGAAGACGGTAGCGAGACTGATATATTCGCTCATTACTCAACGATTGTAATGGACGGTTATAAAACACTTAAAGCTGGTCAAGATGTAACATTCGAATTGCAACAAGGTCCAAAAGGGTTACACGCAACGAATATTGCGCCTAACGATGAAATTTCTTAG
GCF_003515985.1_WP_005968829.1	MAKIKGQVKWFNESKGFGFITPADGSKDVFVHFSAIQGNGFKTLAEGQNVEFEIQDGQKGPSAVNVTAL	ATGGCAAAGATTAAAGGTCAGGTTAAGTGGTTCAACGAGTCTAAAGGTTTTGGCTTCATTACTCCGGCTGACGGCAGCAAAGATGTATTCGTACATTTCTCTGCAATCCAGGGTAACGGCTTCAAAACTCTGGCTGAAGGCCAGAACGTTGAGTTTGAAATTCAGGATGGCCAGAAAGGTCCTTCAGCAGTAAACGTTACTGCACTGTAA
GCF_003515985.1_WP_026738919.1	MSKITGSVKWFNESKGFGFITPEDGSKDVFVHFSAIQSNGFKTLAEGQRVEFEITSGAKGPSAANVIAI	ATGTCTAAGATTACAGGTAGCGTTAAGTGGTTTAATGAGTCCAAAGGATTCGGTTTCATTACTCCTGAAGATGGTAGCAAAGACGTGTTCGTACACTTCTCTGCCATCCAGAGCAATGGCTTCAAAACTCTGGCTGAAGGTCAGCGTGTAGAGTTTGAAATCACTAGCGGTGCAAAAGGTCCTTCTGCTGCTAACGTTATCGCTATTTAA
GCF_003515985.1_WP_085651442.1	MSDKMTGLVKWFNADKGFGFITPSNGSKDVFVHFSAIQGDNFKTLYEGQKVEFSVENGAKGPSATNVVAE	ATGTCTGATAAAATGACTGGTTTAGTAAAATGGTTCAACGCTGATAAAGGCTTTGGTTTCATCACTCCGAGCAATGGTAGCAAAGATGTGTTCGTTCACTTCTCTGCCATTCAGGGCGATAACTTCAAAACGTTGTATGAAGGCCAGAAAGTTGAATTCTCCGTTGAAAACGGTGCAAAAGGTCCTTCAGCTACCAACGTTGTTGCTGAATAA
GCF_003515985.1_WP_085653018.1	METGTVKWFNNAKGFGFICPEGGGEDIFAHYSTIQMDGYRTLKAGQVVNYSVHQGPKGNHASLIVPLINEPVV	ATGGAGACGGGTACTGTTAAATGGTTCAATAACGCCAAAGGCTTTGGTTTTATTTGCCCTGAGGGCGGAGGGGAAGACATTTTCGCACACTACTCAACCATTCAAATGGACGGCTATCGCACGCTAAAAGCCGGCCAGGTGGTTAATTACAGTGTGCACCAGGGACCGAAAGGCAATCATGCCAGCCTGATCGTGCCGTTAATCAACGAGCCGGTAGTCTGA
GCF_003516125.1_WP_002439184.1	MSKIKGNVKWFNESKGFGFITPEDGSKDVFVHFSAIQSNGFKTLAEGQRVEFEITNGAKGPSAANVIAL	ATGTCTAAGATTAAAGGTAACGTTAAGTGGTTTAATGAATCCAAAGGATTCGGTTTCATTACTCCGGAAGATGGCAGCAAAGACGTGTTCGTACACTTCTCTGCGATCCAGAGCAATGGTTTCAAAACTCTGGCTGAAGGTCAGCGTGTAGAGTTCGAAATCACTAACGGTGCCAAAGGCCCTTCTGCTGCTAACGTAATCGCTCTGTAA
GCF_003516125.1_WP_004385765.1	MANRMNGSVKWFNADKGFGFIAPADGSKDVFVHFSAIQSDNFRTLTEGQQVEFSVENGAKGPSAVNVVAL	ATGGCTAACAGAATGAATGGTTCAGTGAAATGGTTTAACGCGGATAAAGGCTTTGGTTTTATCGCACCGGCAGACGGCAGCAAAGACGTATTCGTCCATTTCTCCGCTATCCAGAGCGATAATTTTCGCACACTGACCGAAGGTCAGCAGGTTGAATTCTCGGTTGAAAACGGCGCGAAAGGCCCGTCAGCCGTGAATGTGGTGGCGCTCTAA
GCF_003516125.1_WP_004386389.1	MSDKMTGLVKWFNAEKGFGFITPDNGSKDVFVHFSAIQNNGFKTLEEGQKVSFSVESGAKGPAAANVTAI	ATGTCTGACAAAATGACTGGTTTAGTAAAATGGTTTAACGCGGAAAAAGGTTTCGGCTTCATCACTCCGGACAACGGCAGCAAGGACGTTTTCGTTCACTTCTCCGCTATCCAGAACAACGGCTTCAAAACCCTGGAAGAAGGCCAGAAGGTCTCTTTCTCCGTTGAAAGCGGCGCGAAAGGCCCGGCAGCTGCGAACGTAACTGCCATCTAA
GCF_003516125.1_WP_004386688.1	MAKIKGQVKWFNESKGFGFITPADGSKDVFVHFSAIQGNGFKTLAEGQNVEFEIQDGQKGPAAVNVVAI	ATGGCAAAGATTAAAGGTCAAGTTAAGTGGTTCAACGAATCTAAAGGTTTTGGTTTCATTACTCCTGCTGACGGCAGCAAAGATGTGTTCGTACACTTCTCTGCAATCCAGGGTAATGGTTTCAAAACTCTGGCCGAAGGCCAGAACGTTGAGTTCGAGATTCAGGACGGCCAGAAAGGTCCGGCAGCTGTTAACGTAGTTGCTATCTAA
GCF_003516125.1_WP_004387937.1	METGTVKWFNNAKGFGFICPEGGGEDIFAHYSTIQMDGYRTLKAGQVVRFDVHQGPKGNHASVIVPLEAEAASAVA	ATGGAGACGGGTACTGTTAAATGGTTCAATAACGCCAAAGGGTTTGGGTTCATCTGCCCTGAAGGCGGCGGCGAAGATATCTTTGCGCACTACTCTACAATCCAGATGGACGGCTACAGAACGCTGAAAGCCGGACAAGTCGTGAGGTTCGATGTGCATCAGGGTCCCAAAGGCAACCATGCCAGCGTCATTGTCCCTCTTGAAGCAGAAGCCGCATCCGCAGTTGCGTAA
GCF_003522965.1_WP_118902869.1	MEHGTVKWFNAEKGYGFITREDGSDVFVHFSAINGEGYKTLEEGQSVTFDIEESDRGPQAVNVDKN	ATGGAACATGGAACAGTAAAATGGTTTAACGCTGAAAAAGGTTATGGTTTTATTACTCGCGAAGACGGTAGCGATGTATTTGTACATTTCTCCGCTATTAACGGTGAAGGATACAAAACTCTTGAAGAAGGTCAATCAGTAACTTTCGATATCGAAGAAAGCGATCGTGGCCCACAAGCTGTTAACGTTGATAAAAATTAA
GCF_003534205.1_WP_036062500.1	MQEGTVKWFNGEKGFGFIEVEGGDDVFVHFSAIEGDGFKTLDEGQKVEFEIVEGQRGPQADKVTKL	ATGCAAGAAGGTACAGTAAAATGGTTCAATGGCGAAAAAGGTTTTGGTTTTATCGAAGTTGAAGGCGGCGACGATGTATTCGTACACTTCAGCGCAATCGAAGGAGACGGTTTTAAAACACTTGACGAGGGTCAAAAAGTAGAGTTTGAAATCGTAGAAGGACAACGTGGACCTCAAGCTGATAAAGTAACAAAACTTTAA
GCF_003546865.1_WP_118990272.1	MAEGKVKWFNADKGFGFIEREGEADVFVHFSAIQGEGFKTLEEGQEVSFDIEDGARGPQAANVEKI	ATGGCAGAAGGAAAAGTTAAATGGTTTAATGCTGATAAAGGTTTTGGATTCATCGAGCGTGAAGGTGAAGCGGACGTATTCGTACACTTCTCAGCTATTCAAGGTGAAGGCTTCAAGACTTTAGAAGAAGGGCAAGAAGTGAGCTTCGATATTGAAGATGGCGCGCGTGGCCCTCAAGCAGCTAACGTAGAGAAAATATAA
GCF_003571725.1_WP_002433901.1	MKQGTVKWFNAEKGFGFIEVEGENDVFVHFSAINQDGYKSLEEGQSVEFEVVEGDRGPQAANVVKL	ATGAAACAAGGTACAGTTAAATGGTTTAACGCTGAAAAAGGATTCGGCTTCATCGAAGTTGAAGGAGAAAACGACGTATTCGTACATTTCTCAGCAATTAACCAAGATGGTTACAAATCATTAGAAGAAGGTCAATCAGTTGAATTTGAAGTAGTTGAAGGCGACCGCGGACCACAAGCTGCGAACGTTGTAAAACTATAA
GCF_003594935.2_WP_000034825.1	MSKIKGNVKWFNESKGFGFITPEDGSKDVFVHFSAIQTNGFKTLAEGQRVEFEITNGAKGPSAANVIAL	ATGTCTAAGATTAAAGGTAACGTTAAGTGGTTTAATGAGTCCAAAGGATTCGGTTTCATTACTCCTGAAGATGGCAGCAAAGACGTGTTCGTACACTTCTCTGCAATCCAGACCAATGGTTTCAAAACCCTGGCTGAAGGTCAGCGCGTTGAGTTTGAAATCACTAACGGTGCCAAAGGCCCTTCTGCTGCTAACGTAATCGCTCTGTAA
GCF_003594935.2_WP_001062678.1	MAKIKGQVKWFNESKGFGFITPADGSKDVFVHFSAIQGNGFKTLAEGQNVEFEIQDGQKGPAAVNVTAI	ATGGCAAAGATTAAAGGTCAAGTTAAGTGGTTCAACGAGTCTAAAGGTTTTGGTTTCATTACTCCTGCTGACGGCAGCAAAGACGTGTTCGTACACTTCTCTGCAATCCAGGGTAACGGCTTCAAAACTCTGGCTGAAGGCCAGAACGTTGAGTTCGAAATTCAGGACGGCCAGAAAGGCCCAGCTGCAGTTAACGTAACTGCTATCTGA
GCF_003594935.2_WP_006174390.1	MEMGTVKWFNNAKGFGFICPEGGGEDIFAHYSTIQMDGYRTLKAGQSVRFDVHQGPKGNHASLIVPVEAEAVA	ATGGAAATGGGTACTGTTAAGTGGTTCAACAACGCCAAAGGGTTTGGCTTCATCTGCCCTGAAGGCGGCGGCGAGGATATCTTCGCTCACTATTCCACCATTCAGATGGATGGTTACAGGACGCTCAAAGCCGGGCAATCCGTCCGGTTCGATGTACACCAGGGGCCAAAAGGCAATCACGCCAGTCTAATCGTCCCCGTTGAAGCAGAAGCGGTTGCATAG
GCF_003594935.2_WP_006177792.1	MSGKMTGLVKWFNADKGFGFITPDDGSKDVFVHFSAIQNEGYKSLDEGQKVSFTIESGAKGPAAGNVVSL	ATGTCTGGTAAAATGACTGGTCTGGTAAAATGGTTCAACGCTGATAAAGGTTTCGGCTTCATCACTCCTGACGATGGCTCAAAAGACGTGTTCGTACACTTCTCTGCTATCCAGAACGAAGGCTACAAATCTCTTGATGAAGGTCAGAAAGTTTCCTTCACCATCGAAAGCGGCGCTAAAGGCCCAGCAGCTGGTAACGTTGTAAGCCTGTAA
GCF_003594935.2_WP_019212363.1	MSNKMTGLVKWFNSDKGFGFISPADGSKDVFVHFSAIQSNDYKTLDEGQKVEFSIENGAKGPAAANVVAL	ATGTCTAATAAAATGACTGGTTTAGTAAAATGGTTTAACTCTGACAAAGGTTTCGGCTTCATTTCGCCGGCTGACGGCAGCAAAGATGTTTTTGTTCATTTCTCTGCCATTCAGAGCAACGATTATAAAACGCTCGACGAAGGCCAGAAGGTTGAGTTCTCGATTGAGAATGGTGCCAAAGGTCCGGCTGCCGCAAACGTCGTCGCGCTTTAA
GCF_003594935.2_WP_119936520.1	MSSKIIGLVKWFNEDKGFGFISPLDGSKDVLVHTSSLLGETFNTLFEGQKVKFAIIGGTKGPIAANVTLCDR	ATGTCATCTAAAATCATAGGTCTTGTTAAGTGGTTTAACGAAGATAAGGGGTTTGGCTTTATCTCCCCACTCGATGGAAGTAAAGATGTTCTTGTTCACACTTCTTCCCTGCTGGGAGAAACATTTAATACTCTATTTGAAGGACAAAAAGTCAAATTCGCTATCATAGGTGGAACTAAAGGTCCAATCGCTGCAAATGTAACACTTTGCGATAGATAA
GCF_003594935.2_WP_119936521.1	MSRKMTGIVKSFDFKSGKGLIIPSDGRKDVFLHVSALSNSESQTLKPGVRVEFYRINGLSGLMAANIFVS	TTGTCGCGTAAAATGACAGGAATTGTCAAAAGTTTTGACTTCAAGAGCGGAAAGGGATTGATTATCCCATCAGATGGCAGAAAAGATGTTTTTTTGCATGTTTCTGCATTAAGTAATAGTGAAAGCCAAACGTTAAAGCCAGGTGTTCGTGTTGAATTTTATCGTATAAATGGACTTAGTGGTCTGATGGCTGCAAATATATTTGTTTCTTAA
GCF_003595175.1_WP_119895731.1	MLSGKVKWFNNAKGYGFILADGRDEDLFAHYSAIQMEGYKTLKAGQPVSFDIVQGPKGLHAVNISTISASAEAPATAPQTQSSALEA	ATGCTTAGCGGTAAGGTCAAGTGGTTCAACAACGCCAAGGGCTATGGATTTATCCTGGCAGACGGCCGAGATGAGGACCTGTTCGCCCACTACTCGGCGATCCAAATGGAAGGCTACAAGACGCTTAAAGCTGGCCAACCGGTAAGCTTCGATATCGTTCAAGGCCCCAAGGGACTGCACGCCGTCAACATCAGCACGATTTCTGCATCGGCTGAAGCCCCCGCTACTGCCCCACAGACCCAGAGTTCTGCGCTCGAAGCTTAA
GCF_003595195.1_WP_119883210.1	MKQGTVKWFNAEKGFGFIEIEGEDDVFVHFSAIQGEGFKTLDEGQSVEFEIVEGNRGPQAANVTKL	ATGAAACAAGGTACTGTAAAATGGTTTAACGCAGAAAAAGGATTTGGTTTCATTGAAATTGAGGGAGAAGATGATGTATTTGTTCACTTTTCTGCAATTCAAGGAGAAGGTTTTAAAACATTAGATGAAGGTCAAAGTGTTGAATTTGAAATCGTAGAAGGAAATCGCGGACCTCAAGCAGCTAATGTAACGAAACTATAA
GCF_003595305.1_WP_003265287.1	MATGTVKWFNDAKGFGFITPDEGGEDLFAHFSAINMQGFKTLKEGQRVSFEITQGPKGKQASNIQAA	ATGGCTACTGGTACCGTCAAGTGGTTCAACGACGCTAAGGGTTTCGGCTTTATTACCCCGGATGAAGGCGGCGAGGACCTTTTCGCGCATTTCTCTGCGATCAACATGCAAGGGTTCAAGACCCTGAAGGAAGGTCAACGCGTTTCGTTTGAAATCACGCAAGGCCCGAAGGGCAAGCAAGCCTCGAATATCCAGGCGGCTTGA
GCF_003595305.1_WP_011002383.1	MANGTVKWFNDAKGFGFISPDEGGEELFAHFSAIQMNGFKTLKEGQRVAFDVTQGPKGKQATNIQAA	ATGGCAAACGGTACGGTCAAGTGGTTCAACGACGCCAAGGGTTTTGGCTTCATCTCTCCCGACGAGGGCGGCGAAGAGCTGTTCGCGCATTTCTCGGCGATCCAGATGAACGGTTTCAAGACGCTCAAGGAAGGCCAGCGCGTCGCGTTCGACGTGACACAGGGCCCGAAGGGCAAGCAGGCCACCAACATCCAGGCCGCCTGA
GCF_003606365.2_WP_010020786.1	MEHGTVKWFNAEKGYGFITREDGSDVFVHFSAIQGDGYKTLEEGQAVTFDIEDSDRGPQASNVVKD	ATGGAACACGGAACAGTTAAATGGTTTAACGCAGAAAAAGGCTATGGTTTTATTACACGCGAAGATGGTAGTGACGTATTTGTTCACTTCTCAGCAATCCAAGGTGACGGTTACAAGACACTTGAAGAAGGTCAAGCTGTAACATTCGACATCGAAGATTCAGATCGTGGCCCACAAGCTTCAAACGTTGTTAAAGACTAA
GCF_003606365.2_WP_120141382.1	MEQGTVKWFNADKGFGFITREDGSDVFAHFSAIQGDGFKTLDEGQHVTFDVEDGDRGPQATNIVKD	ATGGAACAAGGTACAGTTAAATGGTTTAACGCTGATAAAGGTTTTGGTTTTATTACTCGCGAAGATGGTAGTGACGTATTTGCTCACTTCTCAGCTATCCAAGGTGATGGTTTCAAGACTTTAGACGAAGGTCAACACGTAACATTCGACGTAGAAGACGGCGACCGTGGACCACAAGCTACTAACATCGTTAAAGACTAA
GCF_003611035.1_WP_035840308.1	MATGTVKWFNAEKGFGFIAPDDGSADVFAHYSAIASNGYKSLDENQKVEFEVTQGPKGPQAENIRAL	ATGGCAACAGGTACCGTGAAATGGTTCAACGCTGAAAAGGGCTTCGGATTCATCGCTCCCGACGACGGAAGCGCCGATGTCTTCGCGCACTACTCTGCGATCGCTTCGAACGGCTACAAGTCGCTCGACGAGAACCAGAAGGTCGAATTCGAGGTCACCCAGGGCCCCAAGGGTCCCCAGGCTGAGAACATCCGCGCCCTCTAA
GCF_003612775.1_WP_013288421.1	MAIGTVKWFNADKGFGFITPDDGGADVFAHFSAIQTSGYRSLDENQRVEFEVTQGQKGPQAENIRPL	ATGGCAATTGGCACCGTCAAGTGGTTCAACGCTGACAAGGGCTTCGGCTTCATCACCCCGGACGACGGCGGCGCCGACGTCTTCGCCCACTTCTCGGCGATCCAGACCTCCGGCTACCGGAGCCTGGACGAGAACCAGCGGGTCGAGTTCGAGGTGACCCAGGGCCAGAAGGGCCCGCAGGCGGAGAACATCCGCCCGCTCTGA
GCF_003614235.1_WP_003364404.1	MKTGIVKWFNAEKGFGFISVEGEDDVFVHFSAIQGDGFKTLEEGQKVEFEVTEGARGPQAANVVKL	ATGAAAACAGGAATAGTTAAATGGTTTAACGCAGAAAAAGGATTTGGATTTATATCTGTAGAAGGAGAAGATGACGTATTCGTACATTTCTCAGCTATCCAAGGAGATGGATTCAAAACTTTAGAAGAAGGACAAAAAGTTGAATTCGAAGTAACTGAAGGTGCTAGAGGACCTCAAGCTGCTAACGTAGTTAAACTATAA
GCF_003627075.1_WP_120763343.1	MPTGTVKWFNAEKGFGFITPDDGAQDVFAHYSAIDSSGYRTLEEGQRVEFEVAQGQKGPQAANIRIA	ATGCCCACTGGAACCGTGAAGTGGTTCAACGCCGAAAAGGGTTTCGGCTTCATCACCCCCGACGATGGCGCCCAGGACGTCTTCGCGCACTACTCGGCCATCGACTCGAGCGGTTACCGCACCCTCGAAGAGGGCCAGCGCGTCGAATTCGAGGTCGCTCAGGGCCAGAAGGGTCCGCAGGCCGCGAACATCCGCATCGCCTGA
GCF_003641185.1_WP_003638037.1	MEHGTVKWFNADKGFGFITRENGSDVFVHFSAIQEDGFKSLEEGQAVTFDVEESDRGPQAVNVTKD	ATGGAACACGGAACAGTTAAATGGTTCAACGCCGATAAGGGTTTTGGTTTTATTACTCGCGAAAACGGTAGCGATGTATTCGTACATTTCTCAGCTATCCAAGAAGACGGCTTCAAGAGCCTTGAAGAAGGCCAAGCCGTAACTTTCGACGTTGAAGAAAGCGATCGTGGCCCACAAGCAGTTAACGTTACTAAAGACTAA
GCF_003667885.1_WP_003224086.1	MLEGKVKWFNSEKGFGFIEVEGQDDVFVHFSAIQGEGFKTLEEGQAVSFEIVEGNRGPQAANVTKEA	ATGTTAGAAGGTAAAGTAAAATGGTTCAACTCTGAAAAAGGTTTCGGATTCATCGAAGTAGAAGGTCAAGACGATGTATTCGTTCATTTCTCTGCTATTCAAGGCGAAGGCTTCAAAACTTTAGAAGAAGGCCAAGCTGTTTCTTTTGAAATCGTTGAAGGAAACCGCGGACCACAAGCTGCTAACGTTACTAAAGAAGCGTAA
GCF_003667885.1_WP_003230776.1	MQNGKVKWFNNEKGFGFIEVEGGDDVFVHFTAIEGDGYKSLEEGQEVSFEIVEGNRGPQASNVVKL	ATGCAAAACGGTAAAGTAAAATGGTTCAACAACGAAAAAGGATTCGGCTTCATTGAAGTTGAAGGCGGAGACGATGTATTTGTTCACTTCACAGCTATCGAAGGAGACGGATACAAATCATTAGAAGAAGGACAAGAAGTTTCTTTTGAAATTGTCGAAGGTAATCGTGGACCTCAAGCTTCTAATGTTGTAAAACTCTAA
GCF_003668795.1_WP_004586755.1	MACGKVKWFNNAKGFGFIVEDGCENDIFAHYSTIVMDGYKTLKAGQDVTFELEQGPKGLHAKNIAPNGDILE	ATGGCTTGTGGTAAAGTCAAATGGTTCAACAACGCCAAAGGTTTTGGTTTCATCGTAGAAGACGGCTGCGAGAATGATATTTTCGCTCATTACTCAACGATTGTAATGGACGGTTATAAGACACTTAAAGCTGGTCAGGATGTAACATTCGAGCTAGAACAAGGCCCTAAGGGCTTACACGCTAAAAACATTGCGCCTAACGGCGACATTTTAGAGTGA
GCF_003671975.1_WP_016711501.1	MASGKVKWFNNAKGYGFINEEGKSDDLFAHYSAIQMDGYKTLKAGQAVEFEIIQGPKGLHAVKIMDAAAAAAAKSQGQAASETVRA	ATGGCAAGCGGTAAAGTCAAGTGGTTCAACAATGCCAAGGGCTACGGATTCATCAACGAGGAAGGTAAATCCGATGACCTTTTCGCTCATTACTCGGCCATCCAGATGGACGGATACAAAACACTGAAGGCTGGCCAGGCCGTGGAGTTCGAGATCATCCAGGGCCCCAAAGGCCTGCACGCGGTGAAGATAATGGACGCCGCTGCCGCTGCGGCTGCCAAGAGCCAAGGCCAGGCCGCGAGCGAAACCGTGCGCGCCTGA
GCF_003710105.1_WP_122825249.1	MSTGTVKWFNADKGFGFIAPDDGGADVFVHYSAISSSGYRSLDEAQKVEFDTTQGPKGPQAENVRPI	ATGTCCACAGGTACCGTGAAGTGGTTCAACGCTGACAAGGGCTTTGGCTTCATTGCCCCCGACGACGGCGGCGCCGACGTCTTCGTCCACTACTCCGCCATCTCCTCGAGCGGCTACCGCTCGCTGGACGAGGCGCAGAAGGTGGAGTTCGACACCACGCAGGGCCCCAAGGGTCCCCAGGCGGAGAACGTTCGCCCCATCTGA
GCF_003711105.1_WP_030442529.1	MVTGVVKWFNADKGFGFITPDDGGADVFAHFSAIQMSGYRSLEENQRVEFEVTQGQKGPQAANIRAV	ATGGTTACCGGCGTTGTGAAGTGGTTCAACGCGGACAAGGGCTTCGGGTTCATCACCCCTGACGACGGCGGCGCCGACGTCTTCGCCCACTTCTCCGCGATCCAGATGTCGGGCTACCGCAGCCTGGAGGAGAACCAGCGGGTTGAGTTCGAGGTGACCCAGGGCCAGAAGGGCCCGCAGGCCGCGAACATCCGCGCGGTCTGA
GCF_003713065.1_WP_123039730.1	MRGTVKWFNAEKGYGFISVENGNDVFVHFSAIQGDGFKTLEEGQAVEFEITQGNRGPQASNVVKL	TTGAGAGGAACAGTTAAGTGGTTTAACGCAGAGAAAGGCTACGGCTTCATCTCCGTAGAGAACGGCAACGACGTATTCGTTCACTTCTCTGCCATCCAAGGCGACGGCTTCAAAACCTTGGAAGAAGGCCAAGCGGTTGAATTCGAAATCACGCAAGGCAACCGTGGTCCGCAAGCATCCAACGTGGTGAAACTGTAA
GCF_003713065.1_WP_123042952.1	MQTGTVKWFNADKGFGFIEVEGGSDVFVHFSAIQGEGFKTLDEGQRVQFNVAQGNRGPQAENVVKL	ATGCAAACAGGAACAGTTAAATGGTTTAACGCGGACAAAGGCTTCGGCTTTATCGAAGTGGAAGGCGGAAGCGATGTTTTCGTCCATTTCAGCGCCATTCAAGGCGAAGGCTTTAAAACGCTTGATGAAGGACAACGCGTGCAATTCAATGTAGCCCAAGGAAATCGCGGGCCGCAAGCCGAGAATGTAGTCAAACTGTAA
GCF_003713065.1_WP_123043074.1	MQQGTVKWFNAEKGFGFIEVEGGNDVFVHFSAIVGDGFKTLDEGQRVEFNVVQGNRGPQAENVVKL	ATGCAACAAGGAACGGTAAAATGGTTCAACGCTGAGAAAGGCTTCGGTTTCATCGAAGTTGAAGGCGGCAATGACGTATTCGTTCACTTCAGCGCGATCGTCGGCGACGGCTTCAAAACCCTCGACGAAGGCCAACGCGTGGAGTTCAACGTGGTTCAAGGCAACCGCGGCCCGCAAGCCGAAAACGTCGTAAAACTGTAA
GCF_003716875.1_WP_123015947.1	MATGTVKWFNNAKGFGFICPEGTNDDIFAHYSTIQMEGYRTLKAGQQVSYEVEEGPKGYHASTVVPIGGDAAK	ATGGCTACAGGTACAGTAAAATGGTTTAATAACGCAAAAGGGTTTGGCTTTATTTGTCCTGAAGGGACTAATGATGACATTTTTGCACACTACTCAACCATTCAGATGGAAGGCTACCGTACACTTAAAGCTGGTCAACAAGTATCTTATGAGGTCGAGGAAGGGCCTAAAGGCTACCACGCAAGTACTGTTGTACCAATTGGAGGTGATGCAGCCAAATAG
GCF_003718735.1_WP_015899695.1	MNNGTVKWFNAEKGFGFIERENGDDVFVHFSAIQGDGYKTLEEGQSVDFDIVEGDRGEQAANVVKMS	ATGAATAACGGTACAGTTAAATGGTTTAACGCAGAAAAAGGTTTTGGATTTATCGAAAGAGAAAATGGTGACGACGTATTCGTACACTTCTCAGCAATCCAAGGCGACGGCTACAAAACTTTAGAAGAAGGCCAAAGCGTAGACTTCGACATCGTTGAAGGCGACCGTGGTGAACAAGCAGCTAACGTTGTAAAAATGTCATAA
GCF_003718735.1_WP_015900294.1	MKQGTVKWFNAEKGFGFIEVEGENDVFVHFSAINQEGYKSLEEGQAVEFEVVEGDRGPQAANVVKL	ATGAAACAAGGTACAGTTAAATGGTTCAACGCTGAAAAAGGATTCGGTTTTATCGAAGTTGAAGGAGAAAACGACGTATTCGTACACTTCTCAGCAATTAACCAAGAAGGTTACAAATCATTAGAAGAAGGTCAAGCAGTAGAATTTGAAGTAGTTGAAGGCGACCGCGGTCCTCAAGCTGCAAACGTTGTTAAACTATAA
GCF_003795125.1_WP_038023529.1	METGTVKWFNAEKGYGFITGEDGNDVFVHFSAIQEEGFKTLEEGQSVTFDIEEGQRGPQATNVVKA	ATGGAAACAGGTACAGTGAAATGGTTTAACGCAGAAAAAGGTTATGGTTTTATTACAGGTGAAGATGGTAACGATGTATTCGTTCACTTTTCAGCTATCCAAGAAGAAGGATTCAAAACCTTAGAAGAAGGCCAATCCGTAACTTTCGATATCGAAGAAGGCCAACGCGGACCACAAGCTACTAATGTAGTAAAAGCTTAA
GCF_003795125.1_WP_123934040.1	MEQGTVKWFNAEKGYGFISREDGSDVFVHFSAIQEEGFKTLEEGQSVTFDVEESDRGPQAVNVVKV	ATGGAACAAGGTACAGTAAAATGGTTTAACGCAGAAAAAGGTTACGGGTTTATCTCTCGTGAAGACGGAAGTGACGTATTTGTCCACTTTTCAGCAATCCAAGAAGAAGGATTCAAAACTTTAGAAGAAGGACAATCTGTTACATTTGATGTTGAAGAATCAGATCGCGGTCCTCAAGCTGTTAATGTTGTAAAAGTATAA
GCF_003795145.1_WP_068708847.1	MEQGTVKWFNAEKGYGFISREDGSDVFVHFSAIQEEGFKTLEEGQSVTFDVEESDRGPQAVNVVKA	ATGGAACAAGGTACAGTAAAATGGTTTAACGCAGAAAAAGGTTATGGGTTTATCTCCCGTGAAGATGGAAGTGACGTGTTTGTCCACTTTTCAGCAATTCAAGAAGAAGGCTTTAAAACTTTAGAAGAAGGACAATCTGTTACATTTGATGTTGAAGAATCAGATCGCGGTCCTCAAGCTGTTAATGTTGTAAAAGCATAG
GCF_003795145.1_WP_124005756.1	METGTVKWFNAEKGYGFITGEDGNDVFVHFSAIQEEGFKTLEEGQAVNFDIEEGQRGPQATNVVKA	ATGGAAACAGGAACAGTTAAATGGTTTAACGCAGAAAAAGGCTACGGCTTTATTACAGGTGAAGACGGAAACGATGTATTCGTTCACTTTTCAGCTATCCAAGAAGAAGGCTTCAAGACTTTAGAAGAAGGTCAAGCTGTAAACTTCGATATCGAAGAAGGCCAACGCGGACCACAAGCTACTAACGTAGTTAAAGCTTAA
GCF_003812345.1_WP_000014594.1	MSGKMTGIVKWFNADKGFGFITPDDGSKDVFVHFSAIQNDGYKSLDEGQKVSFTIESGAKGPAAGNVTSL	ATGTCCGGTAAAATGACTGGTATCGTAAAATGGTTCAACGCTGACAAAGGTTTCGGCTTCATCACTCCTGACGATGGCTCTAAAGACGTGTTCGTACACTTCTCTGCTATCCAGAACGATGGCTACAAATCTCTGGACGAAGGTCAGAAAGTTTCCTTCACCATCGAAAGCGGCGCTAAAGGCCCGGCAGCTGGCAACGTAACCAGCCTGTAA
GCF_003812345.1_WP_000034825.1	MSKIKGNVKWFNESKGFGFITPEDGSKDVFVHFSAIQTNGFKTLAEGQRVEFEITNGAKGPSAANVIAL	ATGTCTAAGATTAAAGGTAACGTTAAGTGGTTTAATGAGTCCAAAGGATTCGGTTTCATTACTCCGGAAGATGGCAGCAAAGACGTGTTCGTACACTTCTCTGCAATCCAGACCAATGGTTTTAAAACTCTGGCTGAAGGTCAGCGTGTAGAGTTCGAAATCACTAACGGTGCCAAAGGCCCTTCTGCTGCAAACGTAATCGCTCTGTAA
GCF_003812345.1_WP_000203924.1	MTSRIMGLVKWFNEDKGFGFISPLDGSKDIFVHLSALDGDNFKTLFEGQKVEFAIHRGDKGPAAANVTLCDK	ATGACCTCTAGAATTATGGGCCTGGTTAAATGGTTTAACGAAGACAAAGGTTTTGGCTTCATCTCTCCTCTTGATGGCAGCAAAGATATCTTTGTCCATTTATCTGCACTTGATGGCGACAACTTTAAAACTTTATTTGAAGGTCAGAAAGTTGAATTCGCCATTCACCGCGGAGACAAGGGTCCTGCTGCTGCAAACGTAACACTTTGCGATAAATAA
GCF_003812345.1_WP_001062678.1	MAKIKGQVKWFNESKGFGFITPADGSKDVFVHFSAIQGNGFKTLAEGQNVEFEIQDGQKGPAAVNVTAI	ATGGCAAAGATTAAAGGTCAAGTTAAGTGGTTCAACGAGTCTAAAGGTTTTGGTTTCATTACTCCGGCTGATGGCAGCAAAGACGTGTTCGTACACTTCTCCGCTATCCAGGGTAACGGCTTCAAAACTCTGGCTGAAGGCCAGAACGTTGAGTTCGAAATTCAGGACGGCCAGAAAGGTCCGGCTGCTGTTAACGTAACAGCTATCTGA
GCF_003812345.1_WP_001446195.1	MSHKMTGIVKSFDILSGKGLIIPSDGRKDVLLHISAVNSRESELLIPGSRIEFCRINGLRGPVAANIYLS	TTGTCCCATAAAATGACAGGAATTGTCAAAAGCTTTGATATTCTTAGTGGTAAAGGCCTCATCATCCCATCTGATGGACGAAAAGACGTTCTGCTTCACATTTCAGCCGTTAACTCTCGCGAATCAGAATTACTCATCCCTGGAAGCCGCATAGAGTTTTGCCGGATAAACGGTCTCAGGGGGCCTGTGGCTGCGAACATTTATCTTTCCTGA
GCF_003812345.1_WP_003033098.1	MSNKMTGLVKWFNSDKGFGFITPQDGSKDVFVHFSAIQSNDFKTLDEGQKVEFSVENGAKGPSAVNVVAL	ATGTCTAACAAAATGACTGGTTTAGTAAAATGGTTTAACTCTGATAAAGGCTTCGGCTTTATCACTCCTCAGGACGGTAGCAAGGATGTGTTTGTGCATTTTTCCGCTATCCAGAGTAACGATTTTAAAACGTTAGACGAAGGTCAAAAGGTGGAATTCTCCGTGGAGAATGGCGCTAAAGGCCCGTCTGCTGTTAACGTTGTCGCGCTGTAA
GCF_003812345.1_WP_003036813.1	METGTVKWFNNAKGFGFICPEGGGEDIFAHYSTIQMDGYRTLKAGQSVQFDVHQGPKGNHASVIVPVIEAEAVA	ATGGAAACGGGTACTGTTAAGTGGTTCAACAACGCCAAAGGGTTTGGTTTCATTTGCCCCGAAGGCGGCGGCGAAGATATTTTCGCCCATTATTCCACCATTCAGATGGATGGTTACAGAACGCTAAAAGCCGGACAGTCTGTCCAGTTTGATGTCCACCAGGGGCCAAAAGGCAATCATGCCAGTGTCATCGTGCCTGTCATTGAAGCAGAAGCTGTCGCATAG
GCF_003812345.1_WP_003841948.1	MSNKMTGLVKWFNADKGFGFISPADGSKDVFVHFSAIQSDNFRTLFEGQKVSFSIENGAKGPVAGNVAITE	ATGTCTAATAAAATGACTGGTTTAGTAAAATGGTTTAATGCTGATAAGGGATTCGGTTTTATCTCTCCTGCTGATGGTAGTAAAGATGTGTTTGTACATTTTTCTGCTATCCAGAGCGATAATTTCCGCACCTTGTTCGAAGGTCAAAAAGTTTCATTCTCCATTGAGAATGGTGCTAAGGGTCCGGTTGCTGGCAATGTAGCGATCACAGAGTAA
GCF_003812345.1_WP_016150027.1	MSNKMTGLVKWFNPEKGFGFITPKDGSKDVFVHFSAIQSHDFKTLNENQEVEFSVEQGPKGPTAVNVVAV	ATGTCTAATAAAATGACTGGTTTAGTTAAATGGTTTAATCCTGAAAAAGGTTTTGGTTTTATCACTCCAAAAGATGGTAGTAAAGATGTGTTTGTTCACTTCTCTGCTATCCAGAGTCATGATTTCAAGACGCTGAATGAGAATCAGGAAGTTGAATTTAGTGTTGAACAGGGACCTAAAGGTCCCACGGCAGTTAATGTCGTGGCTGTATAA
GCF_003812345.1_WP_071992552.1	MSRKMTGIVTAFDCKSGKGLISPSDGRIDVQLHISALNLRDSEVLLPGLRVEFCRINGLRGPSAANVYLS	TTGTCTCGTAAAATGACAGGAATTGTCACAGCCTTTGACTGCAAAAGCGGTAAAGGTCTAATCTCCCCCTCCGATGGTCGCATAGATGTTCAGCTTCACATTTCAGCTCTAAATCTCCGTGACTCAGAAGTACTCCTTCCCGGATTGCGCGTTGAGTTTTGTCGAATAAATGGTCTACGAGGCCCATCTGCAGCGAACGTGTATCTCTCATGA
GCF_003812505.1_WP_001831260.1	MKQGTVKWFNAEKGFGFIEVEGENDVFVHFSAINQEGYKSLEEGQSVEFEVVEGDRGPQAANVVKL	ATGAAACAAGGTACAGTTAAATGGTTTAACGCTGAAAAAGGTTTTGGCTTCATCGAAGTTGAAGGAGAAAACGACGTATTCGTACACTTCTCAGCAATTAACCAAGAAGGTTATAAATCATTAGAAGAAGGTCAATCAGTTGAGTTTGAAGTAGTTGAAGGCGATCGCGGTCCTCAAGCTGCAAACGTTGTTAAACTATAA
GCF_003812925.1_WP_000014594.1	MSGKMTGIVKWFNADKGFGFITPDDGSKDVFVHFSAIQNDGYKSLDEGQKVSFTIESGAKGPAAGNVTSL	ATGTCCGGTAAAATGACTGGTATCGTAAAATGGTTCAACGCTGACAAAGGCTTTGGCTTCATCACTCCTGACGATGGCTCTAAAGACGTGTTCGTACACTTCTCTGCTATCCAGAACGATGGCTACAAATCTCTGGACGAAGGTCAGAAAGTTTCCTTCACCATCGAAAGCGGCGCTAAAGGCCCGGCAGCTGGCAACGTAACCAGCCTGTAA
GCF_003812925.1_WP_001062678.1	MAKIKGQVKWFNESKGFGFITPADGSKDVFVHFSAIQGNGFKTLAEGQNVEFEIQDGQKGPAAVNVTAI	ATGGCAAAGATTAAAGGTCAAGTTAAGTGGTTCAACGAGTCTAAAGGTTTTGGCTTCATTACTCCGGCTGATGGCAGCAAAGATGTGTTCGTACACTTCTCCGCTATCCAGGGTAACGGCTTCAAAACTCTGGCTGAAGGCCAGAACGTTGAGTTCGAAATTCAGGACGGCCAGAAAGGTCCAGCTGCAGTTAACGTAACTGCTATCTGA
GCF_003812925.1_WP_004100146.1	MSKIKGNVKWFNESKGFGFITPEDGSKDVFVHFSAIQSNGFKTLAEGQRVEFEITNGAKGPSAANVMPI	ATGTCTAAGATTAAAGGTAACGTTAAGTGGTTTAATGAGTCCAAAGGATTCGGTTTCATTACTCCGGAAGATGGCAGCAAAGATGTATTCGTACATTTCTCTGCAATCCAGTCCAACGGTTTCAAAACTCTGGCTGAAGGTCAGCGCGTAGAGTTCGAAATCACTAACGGTGCCAAAGGCCCTTCTGCTGCAAACGTAATGCCTATCTAA
GCF_003812925.1_WP_004100627.1	MEMGTVKWFNNAKGFGFICPEGGGEDIFAHYSTIQMDGYRTLKAGQAVRFDVHQGPKGNHASVIVPVEAEETETAA	ATGGAAATGGGTACTGTTAAGTGGTTCAACAATGCCAAAGGGTTCGGTTTTATCTGCCCTGAGGGCGGCGGCGAAGACATTTTCGCCCATTACTCGACCATCCAGATGGATGGTTACAGAACGCTAAAAGCCGGACAAGCGGTTCGGTTTGATGTTCACCAGGGGCCAAAAGGTAATCACGCCAGCGTGATCGTCCCTGTTGAAGCGGAAGAAACAGAAACAGCCGCATAA
GCF_003812925.1_WP_004100844.1	MSNKMTGLVKWFNESKGFGFITPDNGSKDVFVHFSAIQSGGFKTLSEGQKVEFTIEDGQKGPSAGNVYAV	ATGTCTAATAAAATGACTGGTTTAGTAAAATGGTTTAACGAATCAAAAGGTTTTGGTTTCATCACTCCGGACAACGGTAGCAAGGATGTTTTCGTCCATTTTTCTGCTATCCAGAGCGGTGGCTTTAAGACCCTGAGCGAAGGCCAGAAAGTCGAATTCACCATTGAAGATGGCCAGAAGGGTCCTTCAGCGGGTAACGTCTACGCCGTTTAA
GCF_003812925.1_WP_004100846.1	MSSRIKGLVKWYNESKGFGFISPLDGSKDIAVNYSALHGDNFNTLFEGQKVEFAIHRGDKGPAATKVILCDKEIF	ATGTCCTCAAGAATTAAAGGTCTGGTGAAGTGGTATAATGAATCGAAGGGGTTTGGTTTCATCTCTCCTCTTGATGGCAGCAAAGATATCGCCGTTAATTACTCAGCGCTTCACGGCGATAACTTTAATACCCTCTTTGAAGGGCAAAAAGTTGAATTTGCCATACATCGCGGTGATAAAGGTCCAGCGGCGACGAAAGTTATTCTGTGCGATAAAGAGATATTTTAG
GCF_003812925.1_WP_012543040.1	MTSRIMGLVKWFNEDKGFGFISPLDGSKDIFVHLSALNGDNFKTLFEGQKVEFAIHRGDKGPAAANVTLCDK	ATGACCTCGAGAATTATGGGCCTGGTTAAATGGTTTAACGAAGACAAAGGTTTTGGCTTCATCTCTCCTCTTGATGGCAGCAAAGATATCTTTGTCCATTTGTCTGCACTTAATGGCGACAACTTTAAAACTTTATTTGAAGGTCAGAAAGTTGAATTCGCCATTCACCGCGGAGACAAGGGTCCTGCTGCTGCAAATGTAACACTTTGCGATAAATAA
GCF_003812925.1_WP_017145721.1	MFQKMTGIVKTFDNKTGKGLIIPSDGRKDVQVHISALSPGEPTTISPGIRVEFRRVNGLRGPTAANVYLS	TTGTTCCAAAAAATGACAGGTATTGTCAAAACATTTGATAATAAAACAGGCAAAGGCCTGATCATCCCCTCCGATGGTCGCAAAGACGTACAGGTTCATATTTCCGCACTATCGCCCGGCGAGCCAACCACAATCAGCCCCGGCATCCGCGTCGAATTTCGTCGAGTCAACGGACTGCGTGGCCCGACCGCCGCCAATGTTTATCTTTCTTAA
GCF_003850565.1_WP_068582275.1	MASGKVKWFNNAKGYGFINEEGKSDDLFAHYSAIEMDGYKTLKAGQAVSFEIIQGPKGLHAVKINSLKAPGETVATEVLHESALS	ATGGCTAGCGGTAAGGTCAAGTGGTTCAACAATGCCAAGGGTTACGGCTTTATTAATGAGGAGGGCAAGAGCGATGACTTGTTTGCCCATTACTCGGCCATCGAAATGGATGGCTACAAGACCTTGAAAGCCGGACAGGCCGTGAGCTTCGAGATCATCCAAGGGCCCAAGGGACTGCATGCGGTCAAAATAAACTCCTTGAAGGCACCCGGCGAAACTGTCGCCACCGAAGTCCTCCATGAGAGCGCCTTGAGCTGA
GCF_003855395.1_WP_124729835.1	MSNKTTGLVKWFNEDKGFGFITPDNGGADVFVHFRSITSEGFKTLAEGQKVSFDVEQGQKGPQAANVAAI	ATGTCTAATAAAACAACTGGTTTAGTAAAATGGTTTAACGAAGATAAAGGTTTTGGCTTTATTACTCCTGACAATGGCGGCGCTGATGTGTTCGTTCATTTCCGTTCAATCACTTCAGAAGGTTTCAAGACTTTAGCTGAAGGCCAAAAAGTATCTTTCGATGTTGAGCAAGGCCAAAAAGGCCCGCAAGCTGCTAACGTAGCTGCAATCTAA
GCF_003855395.1_WP_124730599.1	MANGTVKWFNNAKGFGFICPDQGGEDVFAHYSTIEMEGYRTLKAGQPVCFEIEEGPKGMHASAISPTI	ATGGCAAACGGAACTGTTAAATGGTTCAACAACGCCAAAGGATTCGGGTTTATTTGCCCTGATCAGGGTGGCGAAGATGTATTTGCGCACTATTCAACTATCGAAATGGAAGGTTATCGTACCTTAAAAGCAGGTCAACCTGTGTGCTTCGAAATTGAGGAAGGCCCTAAAGGAATGCATGCTTCAGCCATCTCGCCAACAATTTAA
GCF_003856495.1_WP_124726598.1	MKGRVKWFNAEKGYGFIEREDGGDVFVHYTAIQGEGFRTLEEGEPVEFDIVEGDRGPQSANVIRLNHVR	ATGAAGGGTAGAGTGAAATGGTTCAACGCTGAAAAAGGTTACGGATTCATCGAGCGCGAAGACGGCGGAGACGTGTTCGTGCACTACACCGCCATCCAAGGCGAAGGTTTCCGTACCCTTGAAGAAGGCGAACCGGTCGAATTTGACATCGTCGAGGGTGACCGCGGACCGCAATCCGCCAACGTCATTCGCCTGAACCACGTCCGCTGA
GCF_003856495.1_WP_124728438.1	MQGKVKWFSAEKGYGFIEREDGGDVFVHFSAIQMEGFKSLEEGQRVEFEIVEGPRGPQAANVVKLDAE	ATGCAAGGCAAAGTCAAGTGGTTCAGCGCGGAAAAAGGCTACGGCTTCATCGAGCGTGAGGACGGCGGCGACGTGTTCGTCCATTTTTCCGCCATCCAAATGGAAGGTTTCAAATCGCTGGAAGAAGGCCAACGCGTAGAGTTTGAGATCGTGGAGGGTCCGCGCGGGCCGCAAGCCGCGAACGTGGTCAAACTTGACGCTGAGTGA
GCF_003931855.1_WP_009222768.1	MKGTVKWFNAEKGYGFIQVEGGEDVFVHFSAIQGEGFKTLEEGQAVEFEITDGNRGPQAANVIKL	TTGAAAGGTACAGTTAAATGGTTTAACGCAGAAAAAGGCTATGGCTTCATCCAAGTTGAAGGCGGCGAAGACGTGTTCGTGCATTTCTCCGCGATTCAAGGCGAAGGATTCAAAACACTAGAAGAAGGCCAAGCCGTTGAGTTCGAAATCACCGACGGTAACCGTGGTCCTCAAGCCGCTAACGTAATCAAATTATAA
GCF_003931855.1_WP_019639749.1	MQTGTVKWFNAEKGFGFIEIEDGNDVFVHFSAIEGEGFKTLDEGQRVQFNVTQGNRGPQAENVTKIY	ATGCAAACAGGTACAGTTAAATGGTTTAACGCGGAGAAAGGCTTTGGATTTATCGAAATCGAGGACGGAAATGACGTATTCGTTCATTTCAGCGCAATCGAAGGCGAAGGCTTCAAAACATTGGACGAGGGTCAACGTGTTCAGTTCAATGTGACACAAGGCAATCGCGGACCGCAAGCCGAGAATGTTACAAAAATTTACTAA
GCF_003931855.1_WP_110930208.1	METGTVKWFNAEKGFGFIEVEGGDDVFVHFSAITGEGFKTLDEGQRVQFNVVQGNRGPQAENVVKL	ATGGAAACTGGAACAGTAAAATGGTTTAACGCTGAGAAGGGCTTTGGCTTTATCGAAGTGGAAGGCGGAGATGACGTATTCGTTCATTTCAGCGCAATTACTGGCGAAGGCTTCAAGACTCTTGATGAAGGCCAACGCGTACAATTTAACGTAGTTCAAGGCAACCGCGGACCGCAAGCCGAAAACGTCGTCAAACTGTAA
GCF_003931855.1_WP_125082014.1	MQGKVKWFNAEKGYGFIETEEGADVFVHFSAIQSEGFKTLEEGQAVEFEIVEGARGPQAANVIKL	ATGCAAGGTAAAGTGAAATGGTTTAACGCAGAGAAGGGTTATGGCTTTATCGAAACGGAAGAAGGCGCAGACGTGTTTGTACATTTCTCGGCTATTCAATCCGAAGGCTTCAAAACGCTGGAAGAAGGACAAGCTGTAGAGTTCGAGATCGTTGAAGGCGCTCGCGGACCGCAAGCGGCTAACGTAATCAAATTATAA
GCF_003935895.2_WP_001062678.1	MAKIKGQVKWFNESKGFGFITPADGSKDVFVHFSAIQGNGFKTLAEGQNVEFEIQDGQKGPAAVNVTAI	ATGGCAAAGATTAAAGGTCAAGTTAAGTGGTTCAACGAGTCTAAAGGTTTTGGCTTCATTACTCCTGCAGACGGCAGCAAAGATGTATTCGTACATTTCTCTGCAATCCAGGGTAACGGCTTCAAAACTCTGGCTGAAGGCCAGAACGTTGAGTTCGAAATTCAGGACGGCCAGAAAGGCCCAGCTGCAGTTAACGTAACTGCTATCTGA
GCF_003935895.2_WP_004100146.1	MSKIKGNVKWFNESKGFGFITPEDGSKDVFVHFSAIQSNGFKTLAEGQRVEFEITNGAKGPSAANVMPI	ATGTCTAAGATTAAAGGTAACGTTAAGTGGTTTAATGAGTCCAAAGGCTTTGGTTTCATTACTCCGGAAGATGGCAGCAAAGATGTATTCGTACACTTCTCTGCAATCCAGTCCAACGGTTTCAAAACTCTGGCCGAAGGCCAGCGTGTAGAGTTCGAAATCACTAACGGTGCCAAAGGCCCATCTGCTGCAAACGTAATGCCTATCTAA
GCF_003935895.2_WP_022647355.1	MSNKMTGLVKWFNADKGFGFITPDDGSKDVFVHFSAIQSDNFKTLDEGQKVSFTIENGAKGPAAGNVSPL	ATGTCTAATAAAATGACTGGTTTAGTAAAATGGTTCAACGCTGATAAAGGTTTCGGCTTCATCACTCCTGACGACGGCAGCAAAGATGTATTCGTACATTTCTCTGCAATCCAGAGCGATAACTTCAAAACTCTCGACGAAGGCCAGAAAGTATCCTTCACCATCGAGAACGGCGCTAAAGGCCCAGCAGCTGGTAATGTTTCCCCGCTGTAA
GCF_003935895.2_WP_125353869.1	MEMGTVKWFNNAKGFGFICPEGGGEDIFAHYSTIQMDGYRTLKAGQAVRFDIHQGPKGNHASVIVPVEAEVAAVA	ATGGAAATGGGTACTGTTAAGTGGTTCAACAATGCTAAAGGGTTCGGTTTTATCTGCCCTGAAGGCGGCGGCGAAGATATCTTCGCGCATTACTCCACCATCCAGATGGATGGCTACAGAACGTTAAAAGCCGGACAAGCCGTTCGGTTTGATATCCACCAGGGGCCAAAAGGCAATCACGCTAGCGTCATCGTTCCGGTCGAAGCTGAAGTCGCCGCAGTGGCGTAA
GCF_003935895.2_WP_125354867.1	MSNQTGIVKWFNAEKGFGFITPKDGSKDVFVHFSAIQSNDFRTLYENQEVDFSVEAGPKGPSAVNVVPR	ATGTCTAATCAGACTGGTATTGTTAAATGGTTTAATGCTGAAAAAGGTTTCGGCTTTATTACACCAAAAGACGGAAGCAAAGATGTCTTCGTACATTTCTCTGCTATCCAAAGCAACGATTTCCGTACTCTGTATGAAAATCAAGAAGTTGATTTCTCCGTTGAAGCAGGTCCTAAGGGTCCTTCCGCTGTCAACGTAGTTCCACGTTGA
GCF_003945345.1_WP_040951936.1	MQTGTVKWFNAEKGFGFIEVEGGNDVFVHFSAIVGDGFKSLDEGQRVEFNVVQGNRGPQAENVVKL	ATGCAAACAGGAACAGTAAAATGGTTTAACGCAGAAAAAGGATTTGGCTTTATCGAAGTTGAAGGCGGCAACGATGTATTCGTACATTTCTCCGCAATCGTTGGAGACGGCTTCAAATCTTTGGACGAAGGCCAACGCGTTGAATTCAACGTTGTTCAAGGCAACCGTGGACCACAAGCAGAAAACGTTGTAAAACTGTAG
GCF_003945345.1_WP_125653563.1	MAQGTVKWFNAEKGFGFIEVEGGNDVFVHFSAIQGEGFKSLDEGQHVEFNVVQGNRGPQAENVVKL	ATGGCACAAGGAACAGTTAAATGGTTTAACGCAGAAAAAGGTTTCGGTTTTATCGAAGTTGAAGGTGGAAATGACGTATTCGTACATTTCTCCGCAATTCAAGGCGAAGGCTTCAAATCCCTTGACGAAGGACAACATGTTGAATTCAACGTTGTTCAAGGCAACCGTGGACCACAAGCAGAAAACGTTGTAAAACTGTAG
GCF_003945345.1_WP_125657979.1	MKGTVKWFNAEKGYGFIQVEGGEDVFVHYSAIQGDGFKSLDEGQSVEFDITQGNRGPQAANVIKL	TTGAAAGGAACTGTGAAGTGGTTTAACGCCGAGAAGGGCTACGGATTCATTCAAGTCGAGGGTGGAGAAGATGTATTCGTTCATTATTCTGCTATTCAAGGCGATGGATTCAAGTCTCTGGATGAAGGTCAGTCGGTTGAATTTGATATTACGCAAGGCAACCGTGGCCCGCAAGCTGCTAACGTCATCAAGTTATAG
GCF_003952225.1_WP_090575021.1	MQQGTVKWFNAEKGFGFIEVEGGNDVFVHFSAIVGEGFKTLDEGQRVEFNVVQGNRGPQAENVVKL	ATGCAACAAGGAACAGTTAAATGGTTTAACGCAGAGAAAGGTTTCGGCTTCATCGAAGTTGAAGGCGGCAACGATGTATTCGTACACTTCTCCGCAATCGTAGGCGAAGGCTTCAAGACTCTTGACGAAGGCCAACGCGTTGAGTTCAACGTTGTTCAAGGCAACCGTGGACCACAAGCAGAAAACGTTGTAAAACTGTAG
GCF_003952225.1_WP_090575545.1	MQGKVKWFNAEKGYGFIETEQGGDVFVHFSAIQSEGFKTLEEGQSVEFDIVEGARGPQAANVTKL	ATGCAAGGTAAAGTTAAATGGTTCAACGCAGAGAAGGGTTATGGTTTCATCGAGACTGAGCAAGGCGGCGACGTATTTGTTCATTTCTCCGCAATCCAATCCGAAGGCTTCAAAACACTTGAAGAAGGCCAATCCGTAGAGTTCGACATCGTCGAAGGCGCACGTGGTCCTCAAGCTGCAAACGTAACTAAACTGTAA
GCF_003952225.1_WP_116189961.1	MKGTVKWFNAEKGYGFIQVDGGEDVFVHYSAIQGEGFKSLDEGQSVEFDITQGNRGPQAANVVKL	TTGAAAGGAACAGTTAAATGGTTTAACGCAGAGAAAGGCTATGGCTTCATTCAAGTTGATGGCGGAGAAGACGTATTCGTTCACTATTCGGCAATTCAAGGCGAGGGCTTCAAGTCGCTTGATGAAGGCCAATCCGTAGAATTCGATATCACGCAAGGCAATCGCGGACCACAAGCTGCTAACGTTGTTAAACTGTAA
GCF_003952225.1_WP_126017131.1	METGTVKWFNAEKGFGFIQRENGDDVFVHFSAIQGDGYKSLDEGQRVEFNVVKGQRGPQAENVVKL	ATGGAAACAGGTACAGTGAAATGGTTTAACGCAGAAAAAGGTTTTGGCTTCATTCAAAGAGAAAACGGTGACGATGTATTCGTTCATTTCTCTGCTATTCAAGGCGATGGTTACAAATCTTTGGACGAAGGCCAACGTGTTGAATTCAATGTTGTTAAAGGCCAACGCGGACCACAAGCTGAAAATGTTGTAAAACTGTAA
GCF_003952225.1_WP_126017357.1	METGTVKWFNAEKGFGFIEMEGGSDVFVHFSAIQGDGFKSLDEGQRVQFNVAQGNRGPQAENVVKL	ATGGAAACAGGAACAGTGAAATGGTTTAACGCAGAGAAAGGCTTTGGATTTATTGAAATGGAGGGCGGAAGTGACGTCTTCGTTCATTTCTCCGCAATTCAAGGGGATGGATTCAAATCGTTGGACGAAGGTCAACGCGTTCAATTTAATGTAGCTCAAGGCAACCGCGGTCCTCAAGCCGAAAATGTTGTAAAACTGTAA
GCF_003955735.1_WP_126129050.1	MATGTVKWFNDSKGFGFITPDDGGEDLFAHFSAIQMNGFKTLKEGQKVQFEVTQGPKGKQASNIQNP	ATGGCAACAGGTACCGTAAAGTGGTTCAATGACTCCAAAGGCTTCGGCTTTATTACTCCGGATGACGGCGGCGAAGATTTATTCGCACATTTTTCCGCAATCCAGATGAACGGCTTTAAGACGCTCAAAGAAGGTCAAAAAGTTCAGTTCGAAGTAACGCAAGGCCCTAAAGGCAAGCAAGCTTCTAACATCCAAAATCCTTAA
GCF_003955755.1_WP_076766616.1	MENGTVKWFNSEKGFGFIEREAGDDVFVHFSAINTDGFKTLEEGQAVSFDIVDGNRGPQAANVEKI	ATGGAAAATGGAACAGTAAAATGGTTTAACTCAGAAAAAGGATTTGGATTTATCGAACGTGAAGCAGGAGACGACGTATTCGTACACTTCTCAGCTATCAACACTGACGGATTCAAAACTTTAGAAGAAGGTCAAGCAGTATCTTTCGACATCGTTGATGGAAACCGTGGCCCTCAAGCTGCTAACGTAGAAAAAATCTAA
GCF_003955755.1_WP_126111157.1	MEQGKVKWFNGEKGFGFIEVEGGDDVFVHFSAIQGDGFKTLEEGQDVEFDIVEGNRGPQAANVVKL	ATGGAACAAGGTAAAGTAAAATGGTTTAACGGCGAAAAAGGATTTGGTTTTATCGAAGTTGAAGGTGGAGACGATGTATTCGTACACTTCTCAGCTATTCAAGGCGACGGCTTTAAAACATTAGAAGAAGGGCAAGACGTGGAATTCGACATTGTTGAAGGAAACCGTGGACCTCAAGCAGCTAATGTTGTAAAATTATAA
GCF_003957745.1_WP_011760171.1	MASGTVKWFNNAKGFGFICPDEGGEDVFAHYSTIEMEGYRTLKAGQPVQFEVEQGPKGMHASAITPAR	ATGGCAAGCGGAACTGTTAAATGGTTCAACAACGCCAAAGGATTCGGGTTTATCTGCCCTGATGAAGGTGGTGAGGATGTATTTGCCCACTATTCAACTATCGAAATGGAAGGCTATCGAACTCTAAAAGCAGGCCAACCAGTCCAGTTCGAAGTTGAGCAAGGTCCAAAGGGGATGCACGCTTCAGCTATAACGCCTGCTCGATAA
GCF_003963515.1_WP_126427940.1	MQQGTVKWFNAEKGYGFIQVEGGDDVFVHYSAIQSPGFKTLEEGQRVEFEIVQGNRGPQAANVIKL	ATGCAACAAGGAACGGTAAAATGGTTTAACGCTGAAAAAGGATACGGCTTCATCCAAGTGGAAGGCGGGGATGACGTATTCGTTCATTACAGTGCGATCCAGTCTCCCGGGTTCAAGACGCTGGAAGAAGGACAACGGGTAGAGTTTGAGATCGTCCAAGGAAATCGCGGTCCGCAAGCAGCCAATGTCATCAAGCTGTAA
GCF_003963515.1_WP_126428716.1	MLGKVKWFNAEKGYGFIEREDGGDVFVHYSAIQAEGFKTLDEGQAVEFDIVEGDRGPQAANVVKL	ATGCTGGGTAAAGTAAAATGGTTCAACGCTGAAAAGGGTTATGGATTCATCGAGCGTGAAGACGGCGGAGACGTGTTTGTTCACTACTCCGCGATTCAGGCGGAAGGATTCAAAACCCTGGATGAAGGTCAGGCTGTGGAGTTCGATATCGTAGAAGGTGACCGCGGACCACAAGCAGCAAACGTCGTTAAACTGTAA
GCF_003966625.1_WP_002433901.1	MKQGTVKWFNAEKGFGFIEVEGENDVFVHFSAINQDGYKSLEEGQSVEFEVVEGDRGPQAANVVKL	ATGAAACAAGGTACAGTTAAATGGTTTAACGCTGAAAAAGGTTTCGGCTTCATCGAAGTTGAAGGAGAAAACGACGTATTCGTACACTTCTCAGCAATCAACCAAGATGGTTACAAATCATTAGAAGAAGGTCAATCAGTTGAATTTGAAGTAGTTGAAGGCGACCGCGGTCCTCAAGCTGCAAACGTTGTTAAACTATAA
GCF_003967275.1_WP_126458251.1	MALGTVKWFNDSKGFGFITPDEGGEDLFAHFSAIQGNGFKSLKENQRVSFDVTTGPKGKQASNIVPA	ATGGCACTGGGTACCGTTAAATGGTTTAACGACTCCAAAGGTTTCGGCTTCATCACCCCCGACGAGGGCGGTGAGGACCTGTTCGCCCACTTCTCCGCGATTCAGGGCAACGGCTTCAAGTCGTTGAAGGAAAATCAGCGGGTCAGCTTCGACGTCACCACCGGCCCCAAGGGCAAGCAGGCGTCGAACATCGTTCCGGCCTGA
GCF_003990335.1_WP_046518730.1	MATGKVKWFNNAKGFGFIREDGRDEDIFAHYSTINMDGYRTLKAGQDVVFDLSEGPKGLHAVNIALPEGHKPE	ATGGCTACCGGTAAAGTGAAATGGTTTAATAATGCCAAAGGATTTGGGTTTATTCGTGAAGATGGTCGTGACGAAGACATCTTCGCCCATTATTCAACCATTAACATGGATGGCTACCGTACGCTGAAGGCCGGCCAGGATGTGGTGTTTGACCTGTCTGAGGGCCCAAAAGGTTTACATGCAGTAAATATCGCACTGCCAGAAGGTCACAAACCTGAATAA
GCF_003991425.1_WP_068778981.1	MQGKVKWFNAEKGYGFIETEEGTDVFVHFSAIQSEGFKTLEEGQSVEFEIVDGARGPQAANVIKL	ATGCAAGGTAAAGTAAAATGGTTTAACGCAGAAAAGGGATACGGTTTCATCGAAACTGAAGAAGGAACAGATGTATTCGTACACTTCTCCGCTATTCAATCCGAAGGCTTCAAGACTTTGGAAGAAGGCCAATCCGTAGAATTCGAAATCGTCGACGGAGCTCGTGGACCACAAGCGGCTAACGTAATCAAATTATAA
GCF_003991425.1_WP_068779348.1	METGTVKWFNAEKGFGFIEVEGGNDVFVHFSAIVGDGFKSLDEGQRVEFNVVQGNRGPQAENVVKL	ATGGAAACAGGAACAGTTAAATGGTTCAACGCAGAGAAAGGCTTTGGTTTTATCGAGGTTGAAGGCGGCAACGACGTATTCGTGCATTTCAGCGCGATCGTTGGCGATGGCTTCAAATCTTTGGACGAAGGCCAACGCGTTGAGTTCAACGTAGTTCAAGGCAACCGTGGTCCACAAGCCGAGAACGTTGTTAAGCTGTAA
GCF_003991425.1_WP_127000998.1	MKGTVKWFNAEKGYGFISVEGGEDVFVHFSAIQGDGFKTLDEGQAVEFEITEGNRGPQAANVIKL	TTGAAAGGTACAGTTAAATGGTTTAACGCAGAGAAAGGCTATGGCTTTATTTCAGTTGAAGGCGGCGAAGACGTATTCGTACATTTCTCTGCAATCCAAGGCGACGGATTCAAAACTTTGGACGAAGGTCAAGCCGTTGAGTTCGAAATCACTGAGGGCAACCGTGGGCCTCAAGCTGCTAACGTAATCAAATTATAA
GCF_003992745.1_WP_005967383.1	METGTVKWFNNAKGFGFICPEGGGDDIFAHYSTIQMDGYRTLKAGQVVRFDVHQGPKGNHACLIVPQIVEAIS	ATGGAGACAGGTACTGTTAAATGGTTCAATAATGCCAAAGGGTTTGGTTTTATCTGTCCAGAAGGGGGCGGTGACGATATCTTCGCACACTACTCAACTATTCAGATGGATGGCTACCGAACGCTAAAAGCCGGACAGGTTGTCAGGTTTGACGTACATCAAGGGCCGAAAGGCAATCACGCTTGCCTGATCGTCCCACAAATCGTCGAGGCCATATCCTGA
GCF_003992745.1_WP_005967874.1	MSNKMTGLVKWFDAGKGFGFITPDNGSKDVFVHFSAIQSNDFKTLDEGQKVEFTIENGQKGPSAGNVVAL	ATGTCTAATAAAATGACTGGTTTAGTAAAATGGTTTGACGCTGGTAAAGGTTTTGGTTTCATTACTCCTGATAACGGTAGCAAAGATGTATTCGTACACTTCTCTGCAATCCAGAGCAACGACTTCAAAACTCTGGACGAAGGCCAAAAGGTTGAGTTCACCATTGAAAATGGTCAGAAAGGCCCATCAGCCGGTAACGTTGTTGCACTGTAA
GCF_003992745.1_WP_005968829.1	MAKIKGQVKWFNESKGFGFITPADGSKDVFVHFSAIQGNGFKTLAEGQNVEFEIQDGQKGPSAVNVTAL	ATGGCAAAGATTAAAGGTCAGGTTAAGTGGTTCAACGAGTCTAAAGGCTTTGGTTTCATCACTCCTGCTGACGGCAGCAAAGATGTATTCGTACACTTCTCTGCAATTCAAGGCAACGGCTTCAAAACTCTGGCTGAAGGCCAGAACGTAGAATTCGAAATTCAGGATGGCCAGAAAGGTCCTTCTGCAGTAAACGTCACTGCGCTGTAA
GCF_003992745.1_WP_005976270.1	MSKIKGSVKWFNESKGFGFITPEDGSKDVFVHFSAIQSNGFKTLAEGQRVEFEITDGAKGPSAANVNAI	ATGTCTAAGATTAAAGGTAGTGTTAAGTGGTTTAATGAGTCTAAAGGCTTCGGTTTCATTACTCCAGAAGATGGTAGCAAAGACGTGTTCGTACACTTCTCTGCCATCCAGAGCAATGGTTTCAAAACTCTGGCTGAAGGTCAGCGTGTAGAGTTCGAAATCACTGACGGTGCCAAAGGTCCTTCTGCTGCTAACGTTAACGCTATTTAA
GCF_004006435.1_WP_003153604.1	MQNGKVKWFNNEKGFGFIEVEGGDDVFVHFTAIEGEGYKSLEEGQEVSFEIVEGNRGPQASNVVKL	ATGCAAAACGGTAAAGTAAAATGGTTCAACAACGAAAAAGGATTCGGCTTCATTGAAGTTGAAGGCGGAGACGATGTATTTGTTCACTTCACAGCTATCGAAGGAGAAGGATACAAATCATTAGAAGAAGGACAAGAAGTTTCTTTTGAAATTGTCGAAGGTAATCGTGGACCTCAAGCTTCTAATGTTGTAAAACTCTAA
GCF_004006435.1_WP_010333136.1	MEQGTVKWFNAEKGFGFIERENGDDVFVHFSAIQGDGFKSLDEGQKVTFDVEQGARGAQAANVQKAA	ATGGAACAAGGTACAGTTAAATGGTTTAATGCAGAAAAAGGTTTTGGATTTATCGAACGTGAAAATGGAGACGACGTATTCGTACACTTCTCTGCAATCCAAGGTGACGGATTCAAATCGTTAGACGAAGGTCAAAAAGTAACGTTTGACGTTGAGCAAGGTGCTCGTGGAGCTCAAGCTGCTAACGTTCAAAAAGCTGCTTAA
GCF_004006435.1_WP_010333137.1	MEQGTVKWFNAEKGFGFIERENGDDVFVHFSAIQGDGFKSLDEGQKVTFDVEQGARGAQAANVQKAS	ATGGAACAAGGTACAGTTAAATGGTTTAATGCAGAAAAAGGTTTTGGATTTATCGAACGTGAAAATGGAGACGACGTATTCGTACACTTCTCTGCAATCCAAGGTGACGGATTCAAATCGTTAGACGAAGGTCAAAAAGTAACGTTTGACGTTGAGCAAGGTGCTCGTGGAGCTCAAGCTGCTAACGTTCAAAAAGCTTCTTAA
GCF_004006435.1_WP_010333511.1	MLEGKVKWFNSEKGFGFIEVEGQDDVFVHFSAIQGEGFKTLEEGQSVSFEIVEGNRGPQAANVTKEA	ATGTTAGAAGGTAAAGTAAAATGGTTCAACTCTGAAAAAGGTTTCGGATTCATCGAAGTAGAAGGTCAAGACGATGTATTCGTTCATTTCTCTGCTATTCAAGGCGAAGGCTTCAAAACTTTAGAAGAAGGCCAATCAGTTTCTTTCGAAATCGTTGAAGGAAACCGTGGACCACAAGCTGCTAACGTTACTAAAGAAGCGTAA
GCF_004089895.1_WP_001062678.1	MAKIKGQVKWFNESKGFGFITPADGSKDVFVHFSAIQGNGFKTLAEGQNVEFEIQDGQKGPAAVNVTAI	ATGGCAAAGATTAAAGGTCAAGTTAAGTGGTTCAACGAGTCTAAAGGTTTTGGTTTCATTACTCCGGCTGACGGCAGCAAAGATGTATTCGTACATTTCTCTGCTATCCAGGGTAACGGCTTCAAAACTCTGGCTGAAGGCCAGAACGTTGAGTTTGAAATTCAGGACGGTCAGAAAGGCCCGGCTGCAGTTAACGTAACTGCTATCTGA
GCF_004089895.1_WP_007373839.1	MSKIKGNVKWFNESKGFGFITPEDGSKDVFVHFSAIQSNGFKTLAEGQRVEFEITNGAKGPSAANVMPV	ATGTCTAAGATTAAAGGTAACGTTAAGTGGTTTAATGAATCCAAAGGATTCGGTTTCATTACTCCGGAAGATGGCAGCAAAGACGTGTTCGTACACTTCTCTGCAATCCAGAGCAATGGTTTCAAAACCCTGGCCGAAGGTCAGCGCGTTGAGTTTGAAATCACTAACGGTGCCAAAGGCCCATCTGCTGCTAACGTAATGCCTGTTTAA
GCF_004089895.1_WP_023480861.1	MSNKMTGIVKWFNAEKGFGFITPKDGSKDVFVHFSAIQSDNYRTLDENQEVEFTIENGAKGPAAANVVPR	ATGTCTAATAAAATGACTGGTATCGTAAAATGGTTCAACGCTGAGAAAGGCTTTGGCTTCATCACTCCTAAAGATGGCAGCAAAGATGTATTCGTACACTTCTCTGCAATCCAGAGCGATAACTACCGCACTCTTGATGAAAATCAGGAAGTTGAATTCACCATTGAAAATGGTGCGAAAGGCCCAGCCGCTGCTAACGTAGTGCCGCGCTAA
GCF_004089895.1_WP_023481381.1	MEMGTVKWFNNAKGFGFICPEGGGEDIFAHYSTIQMDGYRTLKAGQTVRFDVHQGPKGNHASLIVPVELEAIA	ATGGAAATGGGTACTGTAAAGTGGTTCAACAATGCCAAAGGGTTTGGCTTCATCTGCCCGGAAGGCGGTGGTGAAGATATCTTCGCCCATTACTCCACCATCCAGATGGATGGTTACAGAACGTTAAAAGCCGGGCAGACGGTCCGGTTTGATGTACACCAGGGCCCTAAAGGCAATCATGCCAGTCTTATCGTGCCAGTAGAACTGGAAGCGATAGCCTGA
GCF_004089895.1_WP_042716246.1	MSNKMTGLVKWFNSDKGFGFITPDDGSKDVFVHFSAIQSDNYKTLDEGQKVSFTIENGAKGPAAGNVTAL	ATGTCTAATAAAATGACTGGTTTAGTAAAATGGTTCAACTCTGATAAAGGTTTTGGCTTTATCACTCCGGACGACGGCAGCAAAGATGTATTCGTACACTTCTCTGCAATCCAGAGCGACAACTACAAAACCCTGGATGAAGGTCAGAAAGTTTCCTTCACCATCGAAAACGGCGCTAAAGGCCCTGCAGCTGGCAACGTTACTGCCCTGTAA
GCF_004101845.1_WP_004270163.1	MENGTVKWFNAEKGYGFVTREDGSDVFVHFSAIQGEGYKTLEEGQSVSFDIEESDRGPQAVNVNKN	ATGGAAAACGGAACTGTAAAATGGTTTAACGCAGAAAAAGGTTACGGCTTTGTAACTCGCGAAGATGGTAGTGATGTATTCGTACATTTCTCAGCTATCCAAGGTGAAGGCTACAAGACTCTTGAAGAAGGTCAAAGCGTTTCTTTCGATATCGAAGAAAGCGACCGCGGCCCACAAGCTGTTAACGTAAACAAAAACTAA
GCF_004101845.1_WP_054644722.1	MEKGTVKWFNNEKGFGFISAEGQDDIFVHFSAIQDEGFKSLEEGQAVEFDIVEGTRGAQAANVVKL	ATGGAAAAAGGAACAGTAAAATGGTTTAACAATGAAAAAGGTTTCGGCTTTATCTCAGCAGAAGGTCAAGACGATATCTTTGTACATTTCAGTGCAATCCAAGACGAAGGCTTCAAGTCATTAGAAGAAGGCCAAGCGGTCGAATTCGACATCGTTGAAGGCACACGTGGAGCACAAGCTGCGAATGTTGTAAAACTTTAA
GCF_004103615.1_WP_003153604.1	MQNGKVKWFNNEKGFGFIEVEGGDDVFVHFTAIEGEGYKSLEEGQEVSFEIVEGNRGPQASNVVKL	ATGCAAAACGGTAAAGTAAAATGGTTTAACAATGAAAAAGGCTTCGGCTTCATCGAAGTTGAAGGCGGAGACGATGTATTCGTTCATTTCACTGCAATCGAAGGTGAAGGATACAAGTCTCTAGAAGAAGGACAAGAAGTTTCTTTCGAAATCGTTGAAGGTAATCGTGGACCTCAAGCATCTAACGTTGTGAAGCTGTAA
GCF_004103615.1_WP_046132989.1	MLEGKVKWFNSEKGFGFIEVEGQDDVFVHFSAIQGEGFKTLEEGQSVTFEIVEGNRGPQASNVVKA	ATGCTAGAAGGTAAAGTAAAATGGTTTAACTCTGAAAAAGGTTTCGGATTCATCGAAGTTGAAGGACAAGACGATGTATTCGTTCACTTCTCTGCTATTCAAGGCGAAGGCTTCAAAACTTTGGAAGAAGGCCAATCCGTAACTTTCGAAATCGTTGAAGGAAACCGCGGACCACAAGCTTCTAACGTAGTAAAAGCGTAA
GCF_004116975.1_WP_004243573.1	MSDKMKGQVKWFNESKGFGFITPADGSKDVFVHFSAIQGNGFKTLAEGQNVEFTIENGAKGPAAANVTAL	ATGTCTGACAAAATGAAAGGTCAAGTTAAGTGGTTCAACGAGTCTAAAGGCTTTGGTTTTATTACTCCAGCAGACGGAAGCAAAGACGTATTCGTTCACTTTTCTGCCATTCAAGGTAACGGTTTCAAAACTCTGGCTGAAGGTCAGAACGTTGAATTCACAATTGAAAACGGTGCAAAAGGTCCAGCTGCTGCTAACGTAACAGCTCTGTAA
GCF_004116975.1_WP_064719291.1	MSKLKGNVKWFNETKGFGFITPEDGSKDVFVHFSAISSEGFKTLAEGQKVEFEVTDGAKGPSAANVVAI	ATGTCTAAATTAAAAGGTAACGTTAAGTGGTTTAACGAAACTAAAGGTTTTGGTTTTATCACTCCAGAAGATGGCAGCAAAGATGTATTTGTACATTTTTCCGCTATTAGTTCAGAAGGCTTTAAAACCCTTGCTGAAGGTCAAAAAGTAGAGTTTGAAGTTACTGACGGCGCGAAAGGGCCATCTGCTGCAAACGTTGTCGCTATCTAA
GCF_004116975.1_WP_064719480.1	METGTVKWFNNAKGFGFITPAEGGEDIFAHYSSIRMEGYRTLKAGQKVSYSTIKGPKGDHADLIIPIIE	ATGGAGACAGGTACAGTTAAGTGGTTCAATAATGCTAAGGGTTTTGGTTTCATTACCCCAGCAGAAGGTGGTGAGGATATCTTTGCCCACTATTCATCAATTCGAATGGAAGGCTATCGTACGCTAAAAGCGGGGCAGAAAGTTAGTTATAGCACGATAAAAGGGCCTAAAGGTGATCATGCAGATCTTATCATTCCTATCATTGAATAA
GCF_004116975.1_WP_064719564.1	MSNTMTGTVKWFNDDKGFGFITPKDGSKDVFVHFSAIQSDSFKSLKEGQEVSFSIENGAKGPAAANVIVL	ATGTCTAATACAATGACTGGTACAGTAAAATGGTTTAACGATGATAAAGGTTTTGGTTTTATCACTCCTAAAGACGGCAGCAAAGATGTATTCGTTCACTTCTCTGCAATCCAGAGCGACAGCTTCAAATCACTGAAAGAAGGTCAAGAAGTTTCATTTTCTATCGAAAATGGCGCTAAAGGTCCTGCTGCAGCGAATGTAATCGTTCTGTAA
GCF_004116975.1_WP_064719657.1	MSNTMTGSVKWFDDGKGFGFITPADGSKDVFVHFSAIQSDSFKSLAEGQQVSFTIENGMKGPSAGNVVAL	ATGTCTAATACAATGACAGGTTCAGTAAAATGGTTCGATGATGGTAAAGGTTTTGGTTTTATTACTCCAGCAGATGGCAGCAAAGATGTATTCGTACATTTCTCTGCAATCCAAAGTGATAGTTTCAAATCTTTAGCTGAAGGCCAACAAGTTTCATTTACCATCGAGAACGGAATGAAAGGTCCTTCTGCTGGTAATGTGGTAGCACTCTAA
GCF_004116975.1_WP_129040513.1	MSNTMTGTVKWFDEGKGFGFITPADGSKDVFVHFSAIQSDSFKTLAEGQQVSFTMENGMKGPSAGNVVAL	ATGTCTAATACAATGACTGGTACAGTAAAATGGTTCGATGAAGGTAAAGGTTTTGGTTTTATTACTCCAGCTGATGGTAGCAAAGATGTATTCGTACATTTCTCTGCAATCCAAAGTGATAGCTTCAAAACATTAGCTGAAGGCCAACAAGTTTCATTCACCATGGAAAATGGTATGAAAGGTCCTTCTGCTGGCAATGTGGTGGCTCTCTAA
GCF_004117055.1_WP_005828688.1	MQANGTVKWFNAEKGYGFIQVEGGDDVFVHYSAIQGDGFKTLEEGQRVEFNIVTGNRGPQAENVVKL	ATGCAAGCGAACGGAACAGTAAAATGGTTTAACGCAGAAAAAGGTTACGGCTTCATTCAAGTAGAAGGCGGAGACGACGTATTCGTACACTACAGCGCAATCCAAGGCGACGGCTTCAAAACTTTGGAAGAAGGCCAGCGCGTTGAGTTCAACATCGTAACAGGCAACCGCGGTCCTCAAGCTGAGAACGTAGTAAAACTGTAA
GCF_004117055.1_WP_005829843.1	MQGKVKWFNAEKGFGFIEREGGDDVFVHFSAIQSDGFRTLEEGQAVEFDIVEGDRGPQAANVVKL	ATGCAAGGCAAAGTAAAATGGTTTAACGCAGAAAAAGGTTTTGGTTTTATCGAGCGAGAAGGTGGCGACGACGTATTTGTCCACTTTTCCGCGATTCAGTCGGATGGTTTTCGGACATTGGAAGAAGGACAAGCTGTAGAATTTGATATTGTGGAAGGCGACCGCGGGCCGCAAGCAGCCAATGTCGTCAAACTGTAA
GCF_004117055.1_WP_005830059.1	MQTGTVKWFNAEKGYGFIAVEGGNDVFVHFSAITGEGFKTLEEGQRVEFNVVEGNRGPQAENVVKL	ATGCAAACAGGTACAGTAAAATGGTTCAACGCTGAAAAAGGTTATGGTTTCATCGCAGTTGAAGGCGGAAACGACGTATTCGTTCACTTCAGCGCAATCACTGGCGAAGGCTTCAAAACTCTTGAAGAAGGCCAACGCGTTGAATTCAACGTGGTAGAAGGCAACCGCGGACCACAAGCTGAGAACGTAGTAAAACTGTAA
GCF_004117055.1_WP_005832370.1	MQQGIVKWFNAEKGYGFIQVEGGDDVFVHYSAIQSEGFKSLDEGQKVEFEIVQGSRGPQAASVTKL	ATGCAACAAGGTATCGTAAAATGGTTTAACGCGGAAAAAGGGTACGGGTTCATCCAAGTGGAAGGCGGAGACGATGTATTCGTACACTACAGCGCGATCCAGTCTGAAGGTTTCAAATCTCTGGACGAAGGTCAAAAAGTTGAGTTCGAAATCGTTCAAGGTAGCCGTGGACCACAAGCTGCTAGCGTAACCAAACTGTAA
GCF_004117095.1_WP_009675016.1	MKGTVKWFNAEKGYGFIQVEGGEDVFVHFSAIQGDGFKTLDEGQEVEFEITDGNRGPQAANVTKL	TTGAAAGGTACAGTTAAATGGTTTAACGCAGAGAAGGGCTATGGCTTCATCCAAGTAGAAGGCGGCGAAGACGTATTCGTTCATTTTTCCGCTATTCAAGGCGATGGATTCAAAACTCTTGACGAAGGCCAAGAAGTAGAATTCGAGATCACGGATGGTAACCGCGGTCCTCAAGCAGCTAACGTCACCAAGTTATAA
GCF_004117095.1_WP_009677088.1	MQGKVKWFNAEKGYGFIEREDGGDVFVHFSAIQTDGFKTLEEGQAVEFDIVEGARGPQAANVNKL	ATGCAAGGTAAAGTAAAATGGTTCAATGCGGAAAAAGGCTACGGTTTTATTGAGCGCGAGGACGGCGGAGACGTATTCGTACATTTCTCTGCAATCCAAACGGACGGTTTCAAAACACTAGAAGAAGGTCAGGCTGTTGAGTTTGACATCGTGGAAGGCGCTCGCGGACCACAAGCAGCTAACGTAAACAAGCTGTAA
GCF_004117095.1_WP_016423690.1	MQTGTVKWFNAEKGFGFIEVEGGNDVFVHFSAIQGEGFKSLDEGQRVEFNVVQGNRGPQAENVVKL	ATGCAAACTGGTACAGTTAAATGGTTCAACGCTGAAAAAGGCTTTGGTTTTATCGAAGTTGAAGGCGGCAACGATGTATTCGTACACTTCTCCGCAATCCAAGGCGAAGGCTTCAAGTCCCTGGACGAAGGCCAACGCGTTGAGTTCAACGTAGTTCAAGGCAACCGCGGACCACAAGCTGAGAACGTTGTTAAGCTGTAA
GCF_004117095.1_WP_042234207.1	METGTVKWFNAEKGFGFIEIEGGKDVFVHFSAIQGEGFKSLDEGQRVQFDIAQGNRGPQAENVVKL	ATGGAAACAGGAACAGTTAAGTGGTTTAACGCTGAGAAAGGCTTCGGTTTCATCGAAATTGAAGGCGGCAAAGACGTTTTCGTTCATTTCTCCGCGATCCAAGGCGAAGGCTTCAAGTCCCTTGACGAAGGCCAACGCGTTCAATTCGACATCGCTCAAGGCAACCGTGGTCCACAAGCCGAGAACGTTGTAAAACTGTAA
GCF_004124235.1_WP_002210893.1	MSNMMKGQVKWFNESKGFGFITPADGSKDVFVHFSAIQDQGFKTLAEGQNVQFSIENGAKGPSAANVTAI	ATGTCTAACATGATGAAAGGTCAAGTAAAGTGGTTCAACGAGTCTAAAGGCTTCGGTTTCATCACTCCAGCTGATGGCAGCAAAGACGTGTTCGTTCACTTCTCTGCAATCCAAGATCAAGGCTTCAAGACCCTGGCTGAAGGCCAGAATGTACAGTTCTCTATCGAGAACGGTGCTAAAGGTCCGTCTGCAGCAAACGTAACTGCAATCTAA
GCF_004124235.1_WP_002221949.1	MAKIKGQVKWFNESKGFGFITPADGSKDVFVHFSAIQGNGFKTLAEGQNVEFEIQDGQKGPSAVNVTAI	ATGGCAAAGATCAAAGGTCAAGTTAAGTGGTTCAACGAGTCTAAAGGTTTCGGTTTCATCACTCCAGCTGACGGCAGCAAAGATGTGTTCGTACACTTCTCTGCAATCCAGGGTAATGGCTTCAAAACCCTGGCTGAAGGCCAGAACGTAGAGTTCGAAATCCAAGACGGTCAGAAAGGTCCGTCTGCAGTAAACGTTACTGCAATCTAA
GCF_004124235.1_WP_005159934.1	MSKKTGQVKWFNEAKGFGFIEQHDGGKDVFVHFSAIATDGFKTLAEGQRVEYTIQDSPRGPAAANVVAL	ATGTCTAAGAAGACAGGTCAGGTTAAGTGGTTCAATGAAGCTAAAGGTTTTGGTTTTATTGAGCAACATGATGGCGGTAAAGATGTGTTTGTTCACTTCTCCGCAATCGCCACTGATGGCTTCAAAACTTTGGCTGAAGGCCAGCGTGTTGAGTACACCATCCAAGACAGCCCGCGCGGGCCGGCTGCTGCAAACGTTGTTGCTCTGTAA
GCF_004124235.1_WP_025376799.1	MSNKMTGLVKWFNADKGFGFITPADGSKDVFVHFSAIQSNDFKTLDEGQKVEFSIESGAKGPAAVNVIAL	ATGTCTAATAAAATGACTGGTTTAGTAAAATGGTTTAACGCTGATAAAGGTTTTGGTTTCATTACTCCTGCTGACGGCAGCAAAGATGTATTCGTACACTTCTCTGCTATTCAGAGCAATGATTTCAAAACGTTAGATGAAGGTCAGAAAGTTGAGTTCTCTATCGAGAGCGGCGCTAAAGGCCCAGCAGCGGTAAATGTTATTGCTCTGTAA
GCF_004124235.1_WP_025376800.1	MSNKMTGLVKWFDAGKGFGFITPADGSKDVFVHFSAIQSNDFKTLDEGQKVEFSIESGAKGPAAVNVVAL	ATGTCTAATAAGATGACTGGTTTAGTAAAATGGTTTGACGCTGGTAAAGGTTTTGGTTTCATTACTCCTGCTGACGGCAGCAAAGATGTATTCGTACACTTCTCTGCTATCCAGAGCAATGATTTCAAAACATTAGATGAAGGTCAAAAAGTTGAGTTCTCTATCGAGAGCGGCGCTAAAGGCCCAGCAGCGGTAAACGTAGTCGCTCTGTAA
GCF_004124235.1_WP_025377546.1	MSKIKGSVKWFNEAKGFGFITPEDGSKDVFVHFSAIASNGFKTLAEGQRVEFEITNGAKGPSAANVIAI	ATGTCTAAGATTAAAGGTAGCGTTAAGTGGTTCAATGAAGCTAAAGGTTTTGGTTTCATTACCCCAGAAGATGGCAGCAAGGACGTTTTCGTTCATTTCTCAGCCATCGCTAGCAACGGTTTCAAAACTCTTGCTGAAGGCCAGCGTGTAGAATTTGAAATCACGAACGGTGCCAAAGGGCCATCTGCTGCTAATGTTATCGCTATCTAA
GCF_004124235.1_WP_025378802.1	METGTVKWFNNAKGFGFICPESGGEDIFAHYSTIQMDGYRTLKAGQMVNFDVHQGPKGNHASLIVPLGLDGVLQDAVPQELAALA	ATGGAGACGGGTACTGTTAAATGGTTCAACAATGCCAAAGGTTTTGGCTTTATTTGCCCTGAGAGCGGCGGCGAAGATATATTCGCTCACTATTCAACTATCCAGATGGATGGCTACCGAACGTTAAAAGCGGGTCAAATGGTTAACTTTGATGTCCATCAGGGCCCCAAAGGGAACCATGCCAGCCTGATTGTTCCACTCGGATTAGATGGGGTACTGCAAGACGCCGTACCTCAGGAACTCGCTGCATTGGCCTAG
GCF_004124315.2_WP_003224086.1	MLEGKVKWFNSEKGFGFIEVEGQDDVFVHFSAIQGEGFKTLEEGQAVSFEIVEGNRGPQAANVTKEA	ATGTTAGAAGGTAAAGTAAAATGGTTCAACTCTGAAAAAGGTTTCGGATTCATCGAAGTAGAAGGTCAAGACGATGTATTCGTTCATTTCTCTGCTATTCAAGGCGAAGGCTTCAAAACTTTAGAAGAAGGCCAAGCTGTTTCTTTTGAAATCGTTGAAGGAAACCGCGGACCACAAGCTGCTAACGTTACTAAAGAAGCGTAA
GCF_004124315.2_WP_003230776.1	MQNGKVKWFNNEKGFGFIEVEGGDDVFVHFTAIEGDGYKSLEEGQEVSFEIVEGNRGPQASNVVKL	ATGCAAAACGGTAAAGTAAAATGGTTCAACAACGAAAAAGGTTTCGGCTTCATTGAAGTTGAAGGCGGAGACGATGTATTTGTTCACTTCACAGCTATCGAAGGAGATGGATACAAATCATTAGAAGAAGGACAAGAAGTTTCTTTTGAAATTGTCGAAGGTAATCGTGGACCTCAAGCTTCTAATGTTGTAAAACTCTAA
GCF_004124315.2_WP_003240492.1	MEQGTVKWFNAEKGFGFIERENGDDVFVHFSAIQGDGFKSLDEGQKVTFDVEQGARGAQAANVQKTA	ATGGAACAAGGTACAGTGAAATGGTTTAATGCAGAAAAAGGTTTTGGATTTATCGAACGTGAAAATGGAGACGATGTATTCGTACACTTCTCTGCAATCCAAGGTGACGGATTCAAATCTTTAGACGAAGGTCAAAAAGTAACGTTTGACGTTGAGCAAGGTGCTCGTGGAGCTCAAGCTGCTAACGTTCAAAAAACTGCTTAA
GCF_004135345.1_WP_129205215.1	MATGTVKWFNAEKGYGFIAPEDGSQDVFAHYSAIQTNGYRSLEEGQRVEFDTAQGPKGLQAENIRPL	ATGGCTACCGGAACCGTGAAGTGGTTCAACGCGGAGAAGGGCTACGGGTTCATCGCCCCCGAGGACGGTTCTCAGGACGTCTTCGCGCACTACTCGGCCATCCAGACCAACGGCTACCGCAGCCTCGAGGAGGGTCAGCGCGTCGAGTTCGACACCGCGCAGGGCCCCAAGGGTCTGCAGGCGGAGAACATCCGCCCGCTCTGA
GCF_004135365.1_WP_028599014.1	MQGKVKWFNAEKGYGFIETEQGGDVFVHFSAIQSEGFKTLEEGQSVEFDIVEGARGPQAANVVKL	ATGCAAGGTAAAGTAAAATGGTTTAACGCAGAGAAGGGTTATGGATTCATCGAAACGGAACAAGGCGGCGACGTATTTGTTCATTTCTCCGCTATCCAATCCGAAGGCTTCAAAACTCTCGAAGAAGGCCAATCGGTCGAATTCGACATCGTTGAAGGCGCACGCGGTCCACAAGCTGCTAACGTAGTGAAACTGTAA
GCF_004135365.1_WP_129439977.1	MKGTVKWFNAEKGYGFIQVENGDDVFVHFSAIQGEGFKSLDEGQEVEFDITEGNRGPQAANVVKL	TTGAAAGGAACAGTTAAATGGTTTAACGCAGAGAAAGGCTACGGCTTTATCCAAGTTGAGAACGGAGACGACGTATTCGTTCACTTCTCTGCAATCCAAGGCGAAGGTTTCAAATCTTTGGATGAAGGACAAGAAGTTGAGTTTGATATCACAGAAGGCAACCGCGGTCCGCAAGCGGCTAACGTTGTTAAATTATAA
GCF_004135365.1_WP_129441802.1	MQQGTVKWFNAEKGYGFIAVEGGNDVFVHFSAIQGDGFKTLDEGQRVEFNVVDGSRGPQAENVVKL	ATGCAACAAGGTACAGTTAAATGGTTCAACGCTGAGAAAGGCTACGGCTTCATCGCAGTTGAAGGCGGTAACGACGTATTCGTACACTTCTCCGCTATCCAAGGCGACGGTTTCAAAACGCTTGACGAAGGCCAACGCGTAGAATTCAACGTGGTTGACGGAAGCCGCGGACCACAAGCAGAAAACGTTGTTAAGCTGTAA
GCF_004135405.1_WP_129189937.1	MTTGIVKWFNAEKGFGFITPDDGQSDVFAHFSAIQGGGFRSLEENQRVEFDVEQGQKGLQAANIRVL	ATGACCACCGGAATCGTCAAGTGGTTCAACGCCGAAAAGGGCTTCGGATTCATCACGCCCGACGACGGCCAGAGCGACGTGTTCGCGCACTTCAGCGCGATCCAGGGCGGAGGCTTCCGTAGCCTCGAAGAGAACCAGCGCGTCGAGTTCGACGTCGAGCAGGGACAGAAGGGGCTCCAGGCCGCGAACATCCGCGTCCTCTAA
GCF_004168365.1_WP_129832826.1	MLTGTVKWFNDAKGFGFIAPENGTEDVFVHYSAITSEGFRTLKEGQKVSFEVVQGPKGSQAAGVVPVL	ATGCTTACTGGTACAGTGAAATGGTTCAACGATGCCAAGGGGTTTGGTTTTATCGCTCCGGAAAATGGCACAGAAGATGTGTTTGTGCACTACTCGGCGATAACTTCGGAGGGGTTCCGAACGTTGAAGGAAGGGCAGAAAGTCAGCTTTGAAGTGGTGCAGGGGCCAAAGGGATCGCAGGCAGCGGGCGTGGTGCCGGTTTTATAA
GCF_004291115.2_WP_002433901.1	MKQGTVKWFNAEKGFGFIEVEGENDVFVHFSAINQDGYKSLEEGQSVEFEVVEGDRGPQAANVVKL	ATGAAACAAGGTACAGTTAAGTGGTTTAATGCTGAAAAAGGTTTCGGCTTCATCGAAGTTGAAGGAGAAAACGACGTATTCGTACACTTCTCAGCAATCAACCAAGATGGTTACAAATCATTAGAAGAAGGTCAATCAGTTGAATTTGAAGTAGTTGAAGGCGATCGCGGTCCTCAAGCTGCAAACGTTGTTAAACTATAA
GCF_004295345.1_WP_130602777.1	MASGTVKWFNNAKGFGFICPDQGGEDVFAHYSTIEMEGYRTLKAGQPVSFEVEQGPKGMHASAISPTK	ATGGCAAGCGGAACTGTTAAATGGTTCAACAACGCCAAAGGATTCGGGTTTATCTGCCCAGATCAGGGTGGCGAAGATGTATTTGCGCATTATTCAACAATTGAGATGGAAGGCTACCGCACATTAAAAGCGGGTCAGCCAGTTTCCTTCGAAGTTGAGCAAGGCCCTAAAGGGATGCACGCTTCGGCCATTTCACCAACAAAATAG
GCF_004295585.1_WP_041059099.1	MQTGTVKWFNADKGFGFIEVEGGNDVFVHFSAITGEGFKTLDEGQRVQFNVVQGNRGPQAENVVKL	ATGCAAACAGGTACAGTTAAATGGTTTAATGCGGACAAAGGCTTCGGTTTCATCGAAGTTGAAGGCGGAAACGATGTATTCGTGCATTTCAGCGCGATCACTGGTGAAGGCTTCAAAACTTTGGACGAAGGACAACGCGTTCAATTCAACGTGGTACAAGGCAACCGTGGACCACAAGCGGAGAACGTTGTTAAACTGTAA
GCF_004295585.1_WP_130615851.1	MEQGTVKWFNADKGFGFIEVEGGNDVFVHFSAIQGDGYKSLDEGQRVEFNIVQGNRGPQAENVVKL	ATGGAACAAGGTACAGTGAAATGGTTTAACGCAGACAAAGGATTTGGATTTATCGAAGTAGAAGGTGGAAATGACGTATTCGTACATTTCTCCGCAATTCAAGGCGACGGTTACAAATCCCTTGACGAAGGCCAACGCGTTGAATTCAACATCGTTCAAGGCAACCGTGGACCACAAGCAGAAAACGTTGTAAAACTGTAA
GCF_004295645.1_WP_047780981.1	MSKKTGKVKWFNESKGFGFIEQDDGGKDVFVHFSAIASEGFKTLAEGQKVEYTIQDSPRGPAAANVVAL	ATGTCCAAGAAAACTGGCAAAGTTAAATGGTTCAATGAAAGCAAAGGTTTTGGTTTTATTGAGCAAGATGATGGTGGTAAAGACGTATTCGTTCACTTCTCTGCTATCGCTAGTGAAGGTTTTAAAACTCTGGCTGAAGGCCAGAAAGTTGAATATACCATTCAAGACAGCCCACGCGGTCCAGCAGCTGCAAACGTTGTTGCTCTGTAA
GCF_004295645.1_WP_108899827.1	MSNTMTGLVKWFNSDKGFGFISPKDGSKDVFVHYSAIQGTNFKTLEEGQEVSFSIENGAKGPSAVNVVAC	ATGTCTAATACAATGACTGGTTTAGTAAAATGGTTTAACAGCGATAAAGGTTTTGGTTTTATCTCTCCTAAAGATGGTAGCAAAGATGTATTCGTACATTATTCAGCTATTCAGGGAACAAATTTCAAAACTTTAGAAGAAGGTCAGGAAGTATCTTTCTCTATCGAGAATGGTGCTAAAGGCCCATCAGCGGTTAACGTTGTTGCTTGCTAA
GCF_004295645.1_WP_130591357.1	MSKKTGHVKWFNESKGFGFITPTDGSKDVFVHFSAIVNDGFKTLAEGQHVEFSIQDSPRGPSAAEVVAL	ATGTCTAAGAAAACTGGTCACGTTAAGTGGTTCAACGAAAGTAAAGGTTTTGGTTTCATCACTCCAACTGATGGCAGCAAAGATGTGTTCGTTCATTTCTCCGCTATCGTTAATGATGGTTTCAAAACTCTGGCAGAAGGCCAGCATGTTGAATTTTCTATTCAAGACAGCCCACGTGGCCCGTCTGCGGCTGAAGTTGTTGCTCTGTAA
GCF_004295665.1_WP_130598583.1	MAHGTVKWFNNAKGFGFIRPDNGGEDIFAHYSTIEMDGYRTLKAGQDVNYELNEGPKGHHAASIRPADSDTE	ATGGCTCACGGTACAGTTAAATGGTTTAATAACGCAAAGGGTTTTGGCTTTATTCGTCCGGATAATGGTGGTGAAGATATATTCGCTCATTACTCTACCATTGAGATGGATGGTTACAGAACGTTAAAAGCCGGACAGGATGTCAATTACGAATTAAATGAAGGTCCAAAAGGACATCATGCCGCCAGTATAAGACCTGCTGACAGCGACACTGAATAA
GCF_004295665.1_WP_130599682.1	MSKSTGIVKWFDETKGFGFITPTDGTKDVFVHFRSIASEGYKSLTEGQQVEFTVEQGQKGPQAANVSVS	ATGTCTAAATCAACTGGTATTGTAAAGTGGTTTGATGAAACTAAAGGCTTTGGCTTTATTACCCCAACAGATGGCACTAAAGATGTTTTTGTTCATTTTCGTTCAATAGCTTCTGAAGGTTATAAAAGCTTAACTGAAGGCCAGCAAGTTGAATTTACTGTTGAGCAAGGTCAAAAAGGCCCTCAAGCAGCCAACGTGTCTGTTAGCTAG
GCF_004296515.1_WP_130579097.1	MSNKIKGQVKWFNESKGFGFITPSDGGKDVFVHFSSIQGSGFKTLTEGQNVEFEIQESQKGPSAINVNII	ATGTCAAATAAAATAAAAGGTCAAGTTAAATGGTTTAATGAATCTAAAGGATTTGGATTTATTACACCTAGTGATGGTGGAAAAGATGTTTTTGTTCATTTTTCTTCTATTCAAGGAAGTGGATTTAAAACATTAACTGAAGGACAAAATGTTGAGTTTGAAATACAAGAAAGTCAAAAAGGACCATCAGCTATTAATGTTAATATAATATAG
GCF_004296535.1_WP_130624170.1	MRIKGQVKWFNESKGFGFITPSDGTKDVFVHFSSIQGSGFKTLSEGQDVEFEIQESQKGPSAINVTTL	ATGAGAATAAAAGGTCAAGTAAAATGGTTTAATGAATCAAAAGGTTTTGGTTTTATTACTCCTAGTGATGGAACTAAAGATGTTTTTGTTCATTTTTCTTCAATACAAGGTAGTGGTTTTAAAACATTATCTGAAGGTCAAGATGTTGAATTTGAAATACAAGAAAGTCAAAAAGGTCCTTCTGCTATAAATGTTACAACTTTATAA
GCF_004322755.1_WP_107141363.1	MATGTVKWFNDSKGFGFITPDDGGEDLFAHFSAINMNGFKTLKEGQKVQFEVTQGPKGKQASNIQAS	ATGGCAACTGGTACCGTTAAGTGGTTCAATGACTCCAAAGGTTTCGGCTTCATCACCCCTGATGATGGTGGCGAAGATTTGTTCGCGCACTTCTCCGCAATCAACATGAACGGCTTCAAGACCCTGAAAGAAGGTCAAAAGGTGCAGTTCGAAGTCACGCAGGGCCCGAAAGGCAAGCAAGCTTCCAACATCCAGGCTAGCTGA
GCF_004322755.1_WP_131145893.1	MATGIVKWFNDSKGFGFITPDEGGEDLFAHFSAIQSNGFKSLQENQRVSFDVTAGPKGKQASNIQPL	ATGGCAACTGGTATCGTAAAATGGTTCAATGATTCGAAGGGTTTTGGCTTCATCACCCCTGACGAAGGCGGCGAAGATCTGTTCGCTCACTTCTCGGCGATCCAAAGCAATGGCTTCAAATCGCTGCAAGAGAACCAGCGCGTATCTTTCGATGTAACCGCTGGCCCGAAAGGCAAGCAAGCATCGAACATTCAGCCTCTGTAA
GCF_004328865.1_WP_004586755.1	MACGKVKWFNNAKGFGFIVEDGCENDIFAHYSTIVMDGYKTLKAGQDVTFELEQGPKGLHAKNIAPNGDILE	ATGGCTTGTGGTAAAGTCAAATGGTTCAACAACGCCAAAGGTTTTGGTTTCATCGTAGAAGACGGCTGCGAGAATGATATTTTCGCTCATTACTCAACGATTGTAATGGACGGTTATAAGACACTTAAAGCTGGTCAAGATGTAACATTCGAATTAGAACAAGGTCCTAAAGGCCTTCATGCTAAAAACATTGCCCCTAACGGTGACATTTTAGAGTGA
GCF_004353525.1_WP_227761904.1	MQGKVKWFNSEKGYGFIESREGGDVFVHYSAIQGNGFKTLEDGQSVKFDIVQGNRGPQAANVTVM	ATGCAAGGAAAAGTTAAATGGTTTAACTCCGAAAAAGGGTATGGATTTATTGAAAGCCGTGAGGGTGGAGATGTTTTCGTCCACTATTCCGCTATCCAGGGGAATGGTTTTAAAACACTGGAAGATGGTCAAAGTGTAAAATTTGATATAGTCCAGGGAAACCGGGGACCTCAAGCAGCTAATGTAACCGTTATGTAG
GCF_004353525.1_WP_227767892.1	MMLGKVKWFNQEKGFGFIERDGGDDVFVHFSAIQEEGFKTLAEGQEVEFEIVEGPRGPQAANVVKL	ATAATGCTGGGTAAAGTTAAGTGGTTCAACCAAGAAAAAGGATTCGGCTTCATTGAAAGGGACGGCGGGGACGATGTATTCGTACATTTCTCAGCTATTCAAGAGGAAGGCTTTAAGACATTAGCTGAAGGCCAGGAAGTTGAATTCGAAATTGTGGAGGGTCCAAGAGGTCCTCAGGCAGCTAATGTTGTTAAATTATAA
GCF_004353845.1_WP_000014594.1	MSGKMTGIVKWFNADKGFGFITPDDGSKDVFVHFSAIQNDGYKSLDEGQKVSFTIESGAKGPAAGNVTSL	ATGTCCGGTAAAATGACTGGTATCGTAAAATGGTTCAACGCTGATAAAGGTTTCGGCTTCATCACTCCTGACGATGGCTCTAAAGACGTGTTCGTACACTTCTCTGCTATCCAGAACGATGGCTACAAATCTCTGGACGAAGGTCAGAAAGTTTCCTTCACCATCGAAAGCGGCGCTAAAGGCCCGGCAGCTGGCAACGTAACCAGCCTGTAA
GCF_004353845.1_WP_000034825.1	MSKIKGNVKWFNESKGFGFITPEDGSKDVFVHFSAIQTNGFKTLAEGQRVEFEITNGAKGPSAANVIAL	ATGTCTAAGATTAAAGGTAACGTTAAGTGGTTTAATGAGTCCAAAGGATTCGGTTTCATTACTCCGGAAGATGGCAGCAAAGACGTGTTCGTACACTTCTCTGCAATCCAGACCAATGGTTTTAAAACTCTGGCTGAAGGTCAGCGTGTAGAGTTCGAAATCACTAACGGTGCCAAAGGCCCTTCTGCTGCAAACGTAATCGCTCTGTAA
GCF_004353845.1_WP_000066494.1	MSNKMTGLVKWFNPEKGFGFITPKDGSKDVFVHFSAIQSNDFKTLNENQEVEFSVEQGPKGPTAVNVVAV	ATGTCTAATAAAATGACTGGTTTAGTTAAATGGTTTAATCCTGAAAAAGGTTTTGGTTTTATCACTCCAAAAGATGGCAGTAAAGATGTGTTTGTTCACTTCTCTGCTATCCAGAGTAATGATTTCAAGACGCTGAATGAGAATCAGGAAGTTGAATTTAGTGTTGAACAGGGACCTAAAGGCCCCACGGCAGTTAATGTCGTGGCTGTATAA
GCF_004353845.1_WP_001062678.1	MAKIKGQVKWFNESKGFGFITPADGSKDVFVHFSAIQGNGFKTLAEGQNVEFEIQDGQKGPAAVNVTAI	ATGGCAAAGATTAAAGGTCAAGTTAAGTGGTTCAACGAGTCTAAAGGTTTTGGTTTCATTACTCCGGCTGATGGCAGCAAAGACGTGTTCGTACACTTCTCCGCTATCCAGGGTAACGGCTTCAAAACTCTGGCTGAAGGCCAGAACGTTGAGTTCGAAATTCAGGACGGCCAGAAAGGTCCGGCTGCTGTTAACGTAACAGCTATCTGA
GCF_004353845.1_WP_016155304.1	MSNKMTGLVKWFNSEKGFGFITPQDGSKDVFVHFSAIQSNDFKTLDEGQKVEFSVENGAKGPSAVNVVAL	ATGTCTAACAAAATGACTGGTTTAGTAAAATGGTTTAACTCTGAGAAAGGCTTCGGCTTTATCACTCCTCAGGATGGTAGCAAGGATGTGTTTGTGCATTTCTCCGCTATCCAGAGTAACGATTTTAAAACGTTAGACGAAGGTCAAAAGGTGGAGTTCTCCGTGGAGAATGGCGCTAAAGGCCCGTCTGCTGTTAACGTTGTCGCGCTGTAA
GCF_004353845.1_WP_103770528.1	METGTVKWFNNAKGFGFICPEGGGEDIFAHYSTIQMDGYRTLKAGQAVQFDVHQGPKGNHASVIVPVIEAEAVA	ATGGAAACGGGTACTGTTAAGTGGTTCAACAACGCCAAAGGGTTTGGTTTCATTTGCCCCGAAGGCGGCGGCGAAGATATTTTCGCCCATTACTCCACCATTCAGATGGATGGTTACAGAACGCTAAAAGCCGGACAGGCTGTCCAGTTTGATGTCCACCAGGGGCCAAAAGGCAATCATGCCAGTGTCATCGTGCCTGTCATTGAAGCAGAAGCTGTCGCATAA
GCF_004358325.1_WP_133363658.1	MEHGTVKWFNADKGFGFITRENGEDVFAHFSAIQGDGYKSLDEGQKVTFDVESSDRGPQAANIVKD	ATGGAACACGGTACAGTTAAATGGTTTAACGCAGACAAGGGCTTCGGCTTCATCACTCGTGAAAACGGCGAAGACGTCTTTGCACACTTCTCAGCTATCCAAGGTGACGGTTACAAGTCACTTGACGAAGGCCAAAAGGTTACTTTTGATGTTGAATCATCAGATCGCGGCCCACAAGCTGCTAACATCGTTAAGGACTAA
GCF_004358345.1_WP_121851838.1	MSNKTTGVVKWFNEDKGFGFITQDNGGADVFVHFRAIASDGFKTLDEGQKVSFEVEQGQKGLQAVNVTAI	ATGTCTAATAAAACAACTGGTGTAGTAAAATGGTTTAACGAAGACAAAGGTTTTGGTTTCATTACTCAAGACAATGGCGGCGCTGACGTTTTCGTTCATTTCCGTGCTATCGCTTCTGACGGTTTCAAAACACTAGACGAAGGTCAAAAAGTATCTTTCGAAGTAGAACAAGGCCAGAAAGGTCTTCAAGCAGTGAACGTAACTGCTATCTAA
GCF_004358345.1_WP_121852398.1	MASGTVKWFNNAKGFGFICPDQGGEDIFAHYSTIDMEGYRTLKAGQPVNYEVEEGPKGMHASAITAVK	ATGGCAAGCGGAACTGTTAAGTGGTTCAACAACGCCAAAGGATTCGGATTTATATGTCCAGATCAAGGCGGTGAAGATATTTTTGCACATTATTCTACCATCGATATGGAAGGTTATCGAACTCTAAAGGCTGGTCAACCAGTTAATTATGAGGTAGAAGAAGGCCCTAAAGGCATGCATGCATCAGCTATTACAGCTGTAAAATAA
GCF_004358445.1_WP_133407117.1	MASGTVKWFNNAKGFGFICPDEGGEDIFAHYSIIDMDGYRTLKAGQPVEYQVEQGPKGMHASAITPVK	ATGGCAAGCGGAACTGTGAAGTGGTTCAACAACGCCAAGGGATTTGGGTTTATTTGTCCTGATGAAGGCGGCGAAGACATTTTTGCACACTATTCAATTATTGATATGGATGGGTATCGTACCCTAAAAGCTGGGCAACCAGTAGAGTATCAAGTTGAACAAGGCCCCAAAGGCATGCATGCATCAGCAATTACGCCAGTAAAATAA
GCF_004367745.1_WP_006463169.1	MATGTVKWFNDSKGFGFITPDDGGEDLFAHFSAIQMNGFKTLKEGQKVQFDVTQGPKGKQASNIQNAA	ATGGCAACAGGTACTGTCAAGTGGTTCAATGATTCCAAAGGCTTTGGCTTTATCACTCCGGATGACGGCGGCGAAGATCTGTTCGCTCACTTCTCCGCAATCCAGATGAACGGCTTCAAGACCCTGAAAGAAGGTCAAAAAGTCCAGTTTGACGTTACGCAAGGCCCCAAAGGCAAGCAAGCTTCGAACATCCAGAACGCCGCTTAA
GCF_004367745.1_WP_006464465.1	MATGTVKWFNDAKGFGFITPDEGGEDLFAHFSAIQSNGFKSLKENQRVSFEVTTGPKGKQASNIVPAA	ATGGCAACTGGTACCGTCAAGTGGTTCAACGATGCAAAGGGTTTTGGTTTCATCACTCCCGATGAAGGTGGCGAAGATCTGTTCGCTCACTTCTCGGCTATTCAGTCGAATGGCTTCAAGTCCCTGAAGGAAAACCAACGCGTTTCCTTCGAAGTGACCACCGGCCCGAAGGGCAAGCAAGCTTCGAACATCGTTCCGGCTGCTTAA
GCF_004379295.1_WP_075527843.1	MKQGTVKWFNAEKGFGFIEVENEDDVFVHFSAIEGEGFKSLDEGQQVEFEVVEGDRGPQAANVVKLV	ATGAAACAAGGTACAGTAAAATGGTTTAACGCAGAAAAAGGTTTTGGCTTCATCGAAGTTGAAAACGAAGACGACGTGTTCGTACACTTCTCAGCTATCGAAGGAGAAGGATTCAAGTCACTTGACGAAGGTCAACAAGTTGAATTCGAAGTTGTTGAAGGCGACCGTGGCCCACAAGCTGCAAACGTTGTAAAACTAGTCTAA
GCF_004421005.1_WP_055937397.1	MATGTVKWFNDSKGFGFITPDDGGEDLFAHFSAINMNGFKTLKEGQKVQFEVTQGPKGKQASNIQSS	ATGGCAACAGGTACCGTTAAGTGGTTCAATGACTCCAAAGGTTTTGGCTTCATCACTCCTGATGATGGCGGCGAGGATTTGTTCGCACACTTCTCCGCAATCAACATGAACGGCTTCAAGACCCTGAAAGAAGGTCAGAAAGTCCAGTTCGAAGTCACGCAAGGCCCTAAAGGCAAGCAAGCTTCCAACATCCAGTCGAGCTGA
GCF_004421005.1_WP_134383344.1	MATGIVKWFNDSKGFGFITPDEGGEDLFAHFSAIQSTGFKSLQENQRVSFEVTAGPKGKQASNIQPL	ATGGCAACTGGTATCGTAAAATGGTTCAATGATTCGAAGGGTTTTGGCTTCATCACCCCTGACGAAGGCGGCGAAGATCTGTTCGCTCACTTCTCGGCGATCCAAAGCACCGGCTTCAAATCTCTGCAAGAGAACCAACGCGTATCTTTCGAAGTGACCGCTGGTCCGAAAGGCAAGCAAGCTTCGAACATTCAGCCTCTGTAA
GCF_004684345.1_WP_000034826.1	MSKIKGNVKWFNESKGFGFITPEDGSKDVFVHFSAIQTNGFKTLAEGQRVEFEITNGAKGPSAANVTAL	ATGTCTAAGATTAAAGGTAACGTTAAGTGGTTTAATGAGTCCAAAGGATTCGGTTTCATTACTCCGGAAGATGGCAGCAAAGATGTGTTCGTACACTTCTCTGCAATCCAGACCAATGGTTTTAAAACTCTGGCTGAAGGTCAGCGTGTAGAGTTCGAAATCACTAACGGTGCCAAAGGCCCTTCTGCTGCAAACGTAACCGCTCTGTAA
GCF_004684345.1_WP_001062678.1	MAKIKGQVKWFNESKGFGFITPADGSKDVFVHFSAIQGNGFKTLAEGQNVEFEIQDGQKGPAAVNVTAI	ATGGCAAAGATTAAAGGTCAAGTTAAGTGGTTCAACGAGTCTAAAGGTTTTGGTTTCATTACTCCTGCTGATGGCAGCAAAGATGTGTTTGTACACTTCTCTGCAATCCAGGGTAACGGTTTCAAAACTCTGGCTGAAGGCCAGAACGTTGAGTTCGAAATTCAGGACGGCCAGAAAGGTCCGGCTGCTGTTAACGTAACAGCTATCTGA
GCF_004684345.1_WP_004126446.1	MSGKMTGIVKWFNADKGFGFITPDDGSKDVFVHFSAIQNEGYKSLDEGQKVSFTIESGAKGPAAGNVTSL	ATGTCCGGTAAAATGACTGGTATCGTAAAATGGTTCAACGCTGATAAAGGCTTCGGTTTCATCACTCCTGACGATGGCTCAAAAGACGTGTTCGTACACTTCTCTGCTATCCAGAACGAAGGCTACAAATCTCTGGATGAAGGTCAGAAAGTTTCCTTCACCATCGAAAGCGGCGCTAAAGGCCCGGCAGCTGGCAACGTAACCAGCCTGTAA
GCF_004684345.1_WP_046479624.1	MSNKMTGLVKWFNPEKGFGFITPKDGSKDVFVHFSAIQSNDFKTLNENQEVEFSVEQGPKGPSAVNVVAL	ATGTCTAATAAAATGACTGGTTTAGTTAAGTGGTTCAATCCTGAGAAAGGTTTTGGATTCATCACCCCGAAAGATGGTAGTAAAGATGTGTTTGTACATTTCTCTGCTATCCAAAGTAACGACTTTAAAACGCTGAATGAAAATCAGGAAGTCGAATTTAGTGTAGAGCAGGGACCTAAAGGCCCATCTGCTGTTAATGTTGTGGCGCTCTAA
GCF_004684345.1_WP_096756563.1	METGTVKWFNNAKGFGFICPEGGGEDIFAHYSTIQMDGYRTLKAGQSVQFDVHQGPKGNHASLIVPVLEAEAVA	ATGGAAACGGGTACTGTCAAGTGGTTCAACAATGCTAAAGGGTTCGGTTTTATCTGCCCCGAAGGCGGTGGCGAAGATATTTTCGCCCATTACTCCACCATTCAGATGGATGGTTACAGAACGCTAAAAGCCGGACAATCTGTCCAGTTTGATGTCCACCAAGGGCCCAAAGGCAATCACGCCAGTCTTATTGTGCCTGTGCTTGAAGCAGAAGCTGTCGCATAA
GCF_004684345.1_WP_096758779.1	MSNKMTGLVKWFNSEKGFGFITPQDGSKDVFVHFSAIQSNDYKTLDEGQKVEFSVENGAKGPSAVNVIAL	ATGTCTAACAAAATGACTGGTTTAGTAAAATGGTTTAACTCTGAGAAAGGCTTCGGCTTTATTACCCCTCAGGACGGTAGCAAGGATGTGTTCGTGCATTTTTCAGCTATCCAGAGCAATGATTATAAAACCTTAGACGAAGGTCAAAAAGTAGAGTTCTCTGTTGAGAACGGTGCTAAAGGCCCGTCTGCTGTTAACGTTATCGCGCTGTAA
GCF_004684345.1_WP_135322015.1	MTSRVKGLVKWFNEDKGFGFISPLDGSKDIFVHFSALNGDDFKTLFEGQKVEFAIHSGDKGPAAANVILCDK	ATGACCTCAAGAGTTAAAGGCTTGGTCAAGTGGTTTAACGAAGACAAAGGTTTTGGTTTTATCTCTCCTCTCGATGGAAGTAAAGATATCTTTGTTCATTTTTCTGCACTTAACGGTGATGACTTCAAAACTTTATTTGAAGGGCAGAAAGTAGAATTCGCAATACACAGCGGTGACAAAGGTCCTGCTGCTGCAAACGTAATACTTTGCGATAAATAA
GCF_004768525.1_WP_026822451.1	MSKVKGNVKWFNEAKGFGFITPEDGSKDVFVHFTAIKSEGFKTLAEGQKVEFDITEGEKGPSAINVVAI	ATGTCAAAAGTTAAAGGTAATGTTAAGTGGTTCAACGAAGCAAAAGGTTTTGGTTTTATCACTCCAGAAGATGGCAGTAAAGATGTATTTGTTCACTTCACCGCTATTAAATCCGAAGGTTTTAAGACTTTAGCCGAAGGTCAGAAAGTTGAGTTTGATATAACTGAGGGGGAGAAAGGGCCATCTGCTATCAACGTTGTTGCCATTTGA
GCF_004768525.1_WP_026823306.1	METGTVKWFNNAKGFGFICPENGGEDIFAHYSSIQMEGYRTLKAGQKVNFSSTKGPKGNHACLIIPVENG	ATGGAGACAGGTACAGTTAAGTGGTTTAATAATGCTAAAGGTTTTGGCTTCATCTGCCCCGAAAATGGTGGCGAAGATATCTTCGCACACTATTCCAGTATCCAGATGGAAGGGTACCGTACATTAAAAGCTGGACAGAAGGTTAATTTTAGTTCAACTAAAGGGCCTAAAGGTAACCATGCCTGCCTTATTATTCCTGTAGAAAATGGATAG
GCF_004768525.1_WP_026823671.1	MSDKMKGQVKWFNESKGFGFITPSDGSKDVFVHFSAIQGNGFKTLAEGQNVEFTIEDGSKGPAAANVTAL	ATGTCTGACAAAATGAAGGGTCAAGTGAAGTGGTTTAACGAATCTAAAGGCTTTGGTTTCATCACTCCTTCTGATGGTAGCAAAGATGTATTCGTTCACTTCTCTGCCATTCAAGGAAATGGATTCAAAACCCTGGCTGAAGGGCAAAATGTAGAATTTACCATTGAAGATGGTTCGAAAGGCCCAGCTGCAGCGAATGTAACTGCTCTTTAA
GCF_004768525.1_WP_026824204.1	MSSINTGIVKWFNADKGFGFISPKNGSQDVFVHYSAIQGNDYKTLYEGQEVNFSVESGHKGPSATNVIALC	ATGTCAAGCATCAATACAGGTATTGTTAAGTGGTTTAACGCGGACAAAGGTTTTGGATTTATTTCACCTAAAAACGGCAGTCAGGATGTGTTTGTTCATTATTCTGCGATTCAGGGTAATGATTATAAAACGCTCTATGAAGGGCAAGAAGTAAACTTCTCAGTCGAAAGTGGCCATAAAGGACCTTCGGCAACTAATGTAATAGCCTTATGCTAG
GCF_004768745.1_WP_002221949.1	MAKIKGQVKWFNESKGFGFITPADGSKDVFVHFSAIQGNGFKTLAEGQNVEFEIQDGQKGPSAVNVTAI	ATGGCAAAGATCAAAGGTCAAGTTAAGTGGTTCAACGAGTCTAAAGGTTTCGGTTTCATCACCCCGGCTGACGGCAGCAAAGACGTGTTCGTACACTTCTCTGCAATCCAGGGTAACGGCTTCAAAACCCTGGCTGAAGGCCAGAACGTTGAGTTCGAAATCCAAGATGGCCAGAAAGGCCCATCTGCAGTAAACGTTACTGCTATCTAA
GCF_004768745.1_WP_004927572.1	MSKITGHVKWFNESKGFGFITPADGSKDVFVHFSAIVSDGFKTLAEGQQVEFSIQDSQRGPAAANVVAI	ATGAGCAAGATCACTGGTCACGTTAAATGGTTCAACGAAAGCAAAGGTTTCGGCTTCATCACGCCTGCCGACGGCTCTAAAGACGTTTTCGTTCATTTTTCCGCTATCGTTAGCGATGGTTTCAAGACTCTGGCTGAAGGCCAGCAGGTTGAATTCTCCATCCAGGACAGCCAACGTGGCCCAGCCGCAGCCAACGTCGTTGCGATTTAA
GCF_004768745.1_WP_004928244.1	MSKKTGQVKWFNESKGFGFIEQHDGGKDVFVHFSAIMTDGFKTLAEGQRVEYTIQDSPRGPAAANVVAL	ATGTCTAAGAAGACGGGTCAAGTTAAGTGGTTCAACGAAAGCAAAGGTTTTGGTTTCATTGAGCAGCACGACGGCGGCAAAGATGTATTCGTACACTTCTCCGCAATCATGACCGACGGTTTCAAGACCCTGGCTGAAGGCCAGCGCGTTGAGTACACCATCCAGGACAGCCCGCGCGGGCCGGCTGCCGCCAACGTAGTTGCTCTGTAA
GCF_004768745.1_WP_004928349.1	METGTVKWFNNAKGFGFICPAGGGEDIFAHYSTIKMDGYRTLKAGQQVSFDVHQGPKGNHASLIVPVESEALS	ATGGAGACGGGTACTGTTAAATGGTTTAACAACGCCAAAGGCTTTGGCTTCATCTGCCCAGCCGGCGGTGGCGAAGATATTTTCGCGCATTATTCCACCATCAAGATGGATGGTTACAGAACGTTGAAGGCAGGCCAGCAGGTCAGCTTCGACGTGCATCAAGGGCCAAAAGGGAACCATGCCAGTCTGATTGTGCCGGTGGAAAGCGAGGCGCTGTCCTGA
GCF_004768745.1_WP_004935122.1	MSNMIKGQVKWFNEAKGFGFITPADGSKDVFVHFSAIQDQGFKTLAEGQNVQFSIENGAKGPSAANVTAI	ATGTCTAACATGATCAAAGGTCAAGTGAAGTGGTTCAACGAAGCTAAAGGTTTTGGTTTCATCACCCCAGCAGACGGCAGCAAAGACGTATTCGTACACTTCTCTGCTATCCAGGATCAAGGCTTCAAGACCCTGGCTGAAGGCCAGAACGTACAGTTCTCTATCGAGAATGGTGCGAAAGGTCCATCTGCGGCTAACGTTACCGCTATCTAA
GCF_004768745.1_WP_004940030.1	MSKIKGSVKWFNESKGFGFITPEDGSKDVFVHFSAIVSNGFKTLAEGQRVEFEITNGAKGPSAANVTAI	ATGTCTAAGATTAAAGGTAGCGTTAAGTGGTTTAATGAATCCAAGGGCTTCGGTTTCATTACTCCGGAAGATGGTAGCAAGGACGTTTTCGTTCACTTCTCTGCCATCGTTAGCAACGGTTTCAAAACGCTTGCTGAAGGCCAGCGTGTAGAATTTGAAATCACGAACGGTGCCAAAGGCCCATCTGCCGCTAACGTTACTGCTATCTAA
GCF_004768745.1_WP_072022372.1	MFQKMTGIIKIFDNKTGKGLIIPSDGRKDVRVHISALSSRETQTITPGIRVEFRRVNGLNGPTAANVYLS	TTGTTCCAAAAAATGACAGGCATCATCAAAATATTTGATAATAAAACAGGTAAAGGATTAATTATTCCCTCTGATGGAAGAAAAGACGTACGAGTACACATTTCAGCATTATCATCACGTGAAACTCAAACAATCACCCCTGGAATTCGAGTGGAATTTAGAAGAGTGAATGGGCTTAATGGGCCTACGGCAGCAAATGTCTATCTTTCCTAA
GCF_004785625.2_WP_112222532.1	MQEGTVKWFNSEKGFGFIEVEGGDDVFVHFSAIQGEGFKTLDEGQKVEFEVEEGNRGPQATNVTKV	ATGCAAGAAGGTACAGTAAAATGGTTTAACTCAGAAAAAGGTTTCGGCTTCATCGAAGTTGAAGGCGGAGATGACGTATTCGTACACTTCTCAGCGATTCAAGGCGAAGGCTTTAAAACGCTTGACGAAGGACAAAAAGTTGAATTTGAAGTAGAGGAAGGCAACCGCGGACCTCAAGCTACAAACGTAACTAAAGTGTAA
GCF_004792415.1_WP_003852684.1	MAKIKGQVKWFNESKGFGFITPADGSKDVFVHFSAIQGNGFKTLAEGQSVEFEIQDGQKGPAAVNVTAI	ATGGCAAAGATTAAAGGTCAGGTTAAGTGGTTCAACGAGTCTAAAGGTTTTGGTTTTATTACTCCTGCTGACGGCAGCAAAGATGTGTTCGTACACTTCTCTGCTATTCAGGGCAACGGTTTTAAAACCCTGGCTGAAGGCCAGAGCGTTGAGTTCGAGATTCAGGACGGCCAGAAAGGCCCTGCAGCTGTTAACGTCACTGCTATCTGA
GCF_004792415.1_WP_003854408.1	MSNKIRGTVKWFNAEKGFGFISPADGSKDVFVHFSAIQGTDFRSLDEGQQVEFTVENGAKGPAAANVVGL	ATGTCTAACAAAATTCGCGGTACCGTTAAATGGTTTAACGCAGAGAAAGGCTTCGGTTTCATCTCTCCTGCAGACGGCAGCAAAGATGTATTCGTACATTTCTCTGCAATCCAGGGCACCGATTTCCGTTCATTAGACGAAGGTCAGCAAGTTGAATTCACAGTAGAAAATGGCGCCAAAGGCCCAGCTGCTGCGAACGTTGTTGGTCTCTAA
GCF_004792415.1_WP_003855207.1	MSNKMTGLVKWFDAGKGFGFISPQDGSKDVFVHFSAIQSNDYKTLDEGQQVEFTIENGAKGPSAANVVPM	ATGTCTAATAAAATGACTGGTTTAGTAAAATGGTTTGACGCAGGTAAAGGCTTCGGTTTTATCTCTCCTCAGGACGGCAGCAAAGATGTATTCGTACATTTCTCTGCAATCCAGAGCAACGATTATAAAACTCTGGACGAAGGCCAGCAGGTCGAATTCACTATTGAAAACGGCGCTAAAGGTCCTTCAGCGGCAAACGTAGTTCCTATGTAA
GCF_004792415.1_WP_006118399.1	MSKIKGNVKWFNESKGFGFITPEDGSKDVFVHFSAIQSNGFKTLAEGQRVEFEITDGAKGPSAANVISL	ATGTCTAAGATCAAAGGTAACGTTAAGTGGTTTAATGAATCTAAAGGATTCGGTTTCATTACTCCTGAAGATGGCAGCAAAGATGTATTCGTACATTTCTCTGCAATCCAGAGCAACGGCTTCAAAACTCTGGCTGAAGGTCAGCGTGTAGAGTTTGAAATCACCGACGGCGCTAAAGGCCCATCTGCTGCTAACGTTATCAGTCTGTAA
GCF_004792415.1_WP_013357297.1	METGTVKWFNNSKGFGFICPVGGGDDIFAHYSTIQMEGYRTLKAGQQVQFDVHEGPKGNHASLIVPVEIQAVA	ATGGAGACGGGCACAGTTAAATGGTTCAATAATTCCAAAGGCTTTGGCTTTATCTGTCCGGTTGGCGGTGGCGACGATATTTTTGCACACTACTCCACCATCCAGATGGAAGGCTACCGCACGCTAAAGGCAGGCCAGCAGGTTCAGTTCGACGTTCATGAAGGTCCGAAAGGCAATCACGCCAGCCTCATCGTGCCGGTTGAGATACAGGCTGTGGCGTGA
GCF_004792515.1_WP_135254426.1	METGTVKWFNAEKGFGFITREGGEDVFVHFSAIQGEGFKSLEEGQAVTFDVESSDRGPQATNVVKQ	ATGGAAACAGGAACAGTGAAATGGTTTAACGCAGAAAAAGGTTTTGGTTTTATTACTCGCGAAGGCGGAGAAGATGTATTTGTACATTTTTCAGCTATTCAAGGTGAAGGGTTCAAATCATTAGAAGAAGGTCAAGCAGTAACATTTGACGTTGAGTCATCAGATCGTGGCCCACAAGCAACTAATGTTGTTAAACAATAA
GCF_004792515.1_WP_135255216.1	MTEGTVKWFNAEKGFGFITVEGGDDVFVHFSAIQGEGFKTLEEGQAVTFEVESGDRGPQAVNVNKA	ATGACAGAAGGAACAGTTAAATGGTTTAACGCAGAAAAAGGTTTCGGATTCATTACTGTTGAAGGTGGAGATGATGTATTTGTACATTTCTCAGCTATCCAAGGTGAAGGATTCAAAACTTTAGAAGAAGGTCAAGCAGTTACTTTCGAAGTAGAATCTGGCGATCGCGGACCTCAAGCAGTAAACGTTAACAAAGCGTAA
GCF_005144905.1_WP_004735656.1	MSNKTNGVVKWFNEEKGFGFLTQDNGGADVFVHFRAIASEGFKTLKEGQQVSFEVEQGQKGLQAANVVAL	ATGTCTAACAAAACAAACGGCGTAGTAAAATGGTTTAACGAAGAGAAAGGTTTCGGTTTCCTAACTCAAGACAACGGCGGCGCTGACGTATTCGTTCACTTCCGTGCTATCGCATCTGAAGGTTTCAAGACTCTTAAAGAAGGCCAACAAGTGTCTTTCGAAGTAGAGCAAGGCCAAAAAGGTCTTCAAGCTGCAAACGTTGTAGCTCTATAA
GCF_005144905.1_WP_010437410.1	MATGTVKWFNNAKGFGFICPEGEDGDIFAHYSTIQMEGYRTLKAGQQVDYEVESGPKGSHASSVVPVEGSVAK	ATGGCTACAGGTACAGTGAAATGGTTTAACAATGCCAAAGGGTTTGGTTTTATTTGTCCAGAAGGTGAAGACGGCGACATTTTCGCGCACTACTCCACAATACAGATGGAAGGTTATCGAACCTTGAAGGCAGGTCAACAGGTCGACTATGAAGTAGAAAGTGGACCTAAAGGCTCGCACGCTAGCTCTGTTGTTCCTGTAGAAGGCAGTGTCGCTAAATAG
GCF_005145005.1_WP_135255216.1	MTEGTVKWFNAEKGFGFITVEGGDDVFVHFSAIQGEGFKTLEEGQAVTFEVESGDRGPQAVNVNKA	ATGACAGAAGGAACAGTTAAATGGTTTAACGCTGAAAAAGGTTTCGGATTCATTACAGTTGAAGGTGGAGATGATGTATTTGTACATTTCTCAGCTATCCAAGGTGAAGGATTCAAAACTTTAGAAGAAGGTCAAGCAGTTACTTTCGAAGTAGAATCTGGCGATCGCGGACCTCAAGCAGTAAACGTTAACAAAGCGTAA
GCF_005221285.1_WP_003682902.1	MATGIVKWFNDAKGFGFITPDEGGEDLFAHFSAINMDGFKTLKEGQRVSFDVTTGPKGKQAANIQAA	ATGGCAACCGGTATCGTAAAATGGTTTAACGACGCTAAAGGTTTTGGTTTCATCACTCCTGATGAAGGTGGAGAAGATTTGTTCGCTCACTTCTCAGCGATCAACATGGATGGTTTCAAAACCCTGAAAGAAGGTCAACGCGTATCTTTCGACGTAACCACCGGCCCTAAAGGCAAACAAGCTGCTAATATTCAAGCTGCTTAA
GCF_005221305.1_WP_002217533.1	MATGIVKWFNDAKGFGFITPDEGGEDLFAHFSAINMEGFKTLKEGQRVSFDVTTGPKGKQAANIQAA	ATGGCAACCGGTATCGTAAAATGGTTTAACGACGCTAAAGGTTTTGGTTTCATCACTCCTGATGAAGGTGGCGAAGATTTGTTCGCTCACTTCTCAGCGATCAACATGGAAGGTTTCAAAACCCTGAAAGAAGGCCAACGCGTGTCTTTCGACGTAACCACCGGCCCTAAAGGCAAACAAGCTGCTAACATTCAAGCTGCTTAA
GCF_005222225.1_WP_137166792.1	MAVGKVKWFNNAKGFGFIVPEDGGEDIFAHYSTIQMDGYRSLKAGQEVTYDVQQGPKGLHAENIGIVDEPER	ATGGCGGTTGGTAAAGTTAAGTGGTTTAACAACGCAAAAGGGTTTGGTTTTATCGTTCCTGAAGATGGTGGTGAGGACATTTTTGCCCACTACTCCACAATCCAGATGGATGGATATCGTTCGCTAAAAGCAGGCCAGGAAGTCACTTACGATGTACAGCAAGGCCCTAAAGGTCTTCACGCTGAAAATATTGGAATTGTTGACGAACCAGAGCGTTAA
GCF_005222225.1_WP_137167452.1	MSNQSIGTVKWFNEDKGFGFISPSDGGKDVFVHFRSIVSDGFKTLAEGQSVSYTVEQGQKGPQASNVNVA	ATGTCTAATCAATCTATTGGCACAGTAAAATGGTTTAACGAAGATAAAGGCTTTGGTTTCATTAGCCCTAGCGACGGCGGAAAAGATGTTTTTGTACACTTCCGTTCAATCGTTTCTGACGGCTTTAAAACGTTGGCTGAAGGTCAAAGCGTATCTTACACTGTTGAGCAAGGCCAGAAAGGTCCACAAGCAAGCAACGTTAATGTTGCCTAA
GCF_005222225.1_WP_137168164.1	MSKVTGTVKWFNADKGYGFLTQDSGDKDVFVHFRAIVSEGYKTLNEGQRVEFEVEQGQKGLQAANVSAL	ATGTCTAAAGTTACAGGTACTGTTAAGTGGTTTAACGCTGATAAAGGTTATGGTTTTCTGACGCAGGATAGCGGCGATAAGGACGTTTTCGTTCATTTCCGCGCAATCGTTTCTGAAGGCTACAAGACGCTGAACGAAGGTCAGCGTGTTGAGTTTGAAGTTGAGCAAGGCCAGAAAGGTCTGCAAGCTGCAAACGTATCAGCTCTGTAA
GCF_005280275.1_WP_046073528.1	METGTVKWFNNAKGFGFICPVEGEGDVFAHYSTIQMDGYKTLKAGQTVNYEVQEGPKGYHASEIVPVDQEAAK	ATGGAAACTGGTACAGTAAAATGGTTTAACAATGCAAAAGGATTTGGCTTTATTTGTCCGGTAGAAGGGGAAGGCGATGTGTTTGCCCACTACTCTACCATCCAGATGGACGGATATAAGACATTAAAGGCGGGACAAACCGTCAACTATGAGGTTCAGGAAGGACCCAAAGGCTACCATGCCAGTGAAATTGTGCCAGTCGATCAAGAAGCGGCGAAATAG
GCF_005280275.1_WP_069360900.1	MSNQATGIVKWFNEEKGFGFITRDNGEKDVFVHFRAIVGEGFKTLTEGQRVNFTVEQGQKGPQASDVSVA	ATGTCTAATCAAGCAACTGGTATCGTAAAGTGGTTTAACGAAGAGAAAGGTTTCGGTTTCATCACTCGTGACAACGGCGAAAAAGACGTGTTTGTACACTTCCGCGCGATCGTTGGCGAAGGTTTCAAAACCCTAACTGAAGGCCAGCGTGTGAACTTCACCGTTGAGCAAGGCCAAAAAGGCCCACAGGCTTCTGACGTTTCTGTAGCATAA
GCF_005280315.1_WP_107141363.1	MATGTVKWFNDSKGFGFITPDDGGEDLFAHFSAINMNGFKTLKEGQKVQFEVTQGPKGKQASNIQAS	ATGGCAACTGGTACCGTTAAGTGGTTCAATGACTCCAAAGGTTTCGGCTTCATCACCCCTGATGATGGTGGCGAAGATTTGTTCGCGCACTTCTCCGCAATCAACATGAACGGCTTCAAGACCCTGAAAGAAGGTCAAAAGGTGCAGTTCGAAGTCACGCAGGGCCCGAAAGGCAAGCAAGCTTCCAATATCCAGGCTAGCTGA
GCF_005280315.1_WP_137312785.1	MATGIVKWFNDSKGFGFITPDEGGEDLFAHFSAIQTNGFKSLQENQRVSFDVTAGPKGKQASNIQPL	ATGGCAACTGGTATCGTAAAATGGTTCAATGATTCGAAGGGTTTTGGCTTCATCACCCCTGACGAAGGCGGCGAAGATCTGTTCGCTCACTTCTCGGCGATCCAAACCAACGGCTTCAAATCTCTGCAAGAGAACCAGCGCGTATCCTTCGATGTAACCGCTGGCCCGAAAGGCAAGCAAGCATCGAACATTCAGCCGCTGTAA
GCF_005484945.1_WP_137712620.1	MSNKMTGLVKWFDAGKGFGFITPTDGSKDVFVHFSAILGLGNDYKSLDEGQKVEFNVESGQKGPSAVNVSVI	ATGTCTAATAAAATGACTGGATTGGTAAAATGGTTTGACGCTGGTAAAGGTTTTGGTTTCATCACCCCGACTGACGGCAGCAAAGATGTTTTCGTTCACTTCTCTGCCATTTTAGGCCTGGGTAACGATTACAAAAGCCTGGACGAAGGCCAGAAAGTTGAATTCAACGTTGAAAGCGGTCAGAAAGGCCCATCAGCGGTGAACGTTTCCGTAATCTAA
GCF_005484945.1_WP_137713037.1	MSKIKGSVKWFNESKGFGFITPEDGSKDVFVHFSAIQSNGFKTLAEGQRVEFEITNGAKGPSAANVMPI	ATGTCTAAGATTAAAGGTAGCGTTAAGTGGTTTAATGAGTCCAAAGGGTTCGGTTTCATTACTCCTGAAGATGGTAGCAAAGACGTTTTCGTACATTTCTCTGCTATTCAGAGCAATGGTTTCAAAACGCTGGCCGAAGGGCAGCGTGTAGAGTTCGAAATCACCAACGGTGCGAAAGGTCCATCAGCTGCTAACGTTATGCCTATTTAA
GCF_005484945.1_WP_137713762.1	MAKMKGQVKWFNESKGFGFITPADGSKDVFVHFSAIQGNGFKTLAEGQNVEFEIQDGQKGPSAVNVTAL	ATGGCAAAGATGAAAGGTCAGGTTAAGTGGTTCAACGAGTCTAAAGGTTTTGGTTTCATCACCCCGGCTGACGGTAGCAAAGATGTATTCGTACACTTCTCTGCAATTCAAGGTAACGGCTTCAAAACACTGGCTGAAGGTCAGAATGTAGAGTTTGAAATTCAAGATGGTCAGAAAGGTCCGTCAGCAGTGAATGTTACTGCGCTGTAA
GCF_005484945.1_WP_137713919.1	METGTVKWFNNAKGFGFICPEGGGEDIFAHYSTIQMDGYRTLKAGQVVRFDVHQGPKGNHASLIVPLVSEAVT	ATGGAGACAGGTACTGTTAAATGGTTCAATAATGCCAAAGGTTTTGGTTTTATCTGTCCTGAAGGCGGCGGCGAAGATATTTTCGCCCACTACTCAACTATTCAAATGGACGGATACCGAACCCTAAAAGCCGGGCAGGTTGTCAGGTTTGATGTTCATCAAGGTCCGAAAGGCAATCATGCCAGTCTGATCGTGCCATTGGTGAGCGAAGCGGTTACCTGA
GCF_005484965.1_WP_002221949.1	MAKIKGQVKWFNESKGFGFITPADGSKDVFVHFSAIQGNGFKTLAEGQNVEFEIQDGQKGPSAVNVTAI	ATGGCAAAGATTAAAGGTCAGGTCAAGTGGTTCAATGAGTCGAAAGGTTTTGGTTTCATCACTCCGGCTGACGGTAGCAAAGATGTATTCGTACACTTCTCTGCAATTCAAGGCAACGGCTTTAAAACTCTGGCTGAAGGCCAGAACGTAGAGTTCGAAATTCAAGACGGTCAGAAAGGTCCGTCTGCAGTCAACGTCACTGCGATTTAA
GCF_005484965.1_WP_009113240.1	METGTVKWFNNAKGFGFICPEGGGEDIFAHYSTIQMDGYRTLKAGQVVRFDVHQGPKGNHASLIVPLVSETVA	ATGGAGACGGGTACTGTTAAATGGTTCAATAATGCCAAGGGTTTCGGTTTTATCTGTCCTGAAGGGGGCGGTGAAGATATCTTCGCTCACTACTCGACAATTCAAATGGACGGATACCGAACGCTAAAGGCTGGACAGGTTGTCAGGTTCGACGTTCATCAAGGACCGAAAGGTAATCATGCAAGTCTGATCGTGCCCCTGGTCAGCGAAACTGTCGCCTGA
GCF_005484965.1_WP_009113827.1	MSKIKGSVKWFNESKGFGFITPEDGSKDVFVHFSAIQSNGFKTLAEGQRVEFEITSGAKGPSAANVIAI	ATGTCTAAGATTAAAGGTAGCGTTAAGTGGTTTAATGAGTCCAAAGGATTCGGTTTCATTACTCCTGAAGATGGTAGCAAAGACGTATTCGTACATTTCTCTGCCATCCAGAGCAATGGATTCAAAACTCTCGCTGAAGGTCAGCGCGTAGAGTTTGAAATCACCAGCGGAGCGAAAGGTCCGTCTGCTGCTAACGTTATCGCTATTTAA
GCF_005484965.1_WP_009114380.1	MSNKMTGLVKWFDAGKGFGFITPTDGSKDVFVHFSAIQGQGNDYKSLDEGQKVEFSVESGQKGPSAVNVSVI	ATGTCTAATAAAATGACTGGATTGGTAAAATGGTTTGACGCTGGTAAAGGTTTTGGTTTCATCACCCCGACTGACGGCAGCAAAGACGTATTCGTTCACTTCTCCGCCATCCAAGGCCAGGGTAACGACTACAAAAGCCTGGACGAAGGCCAGAAAGTGGAATTCAGCGTTGAAAGCGGCCAGAAAGGCCCATCAGCAGTGAATGTTTCCGTAATCTAA
GCF_005577435.1_WP_006207896.1	MQTGTVKWFNAEKGFGFIEVEGGNDVFVHFSAIQGDGFKTLDEGQRVEFNIVEGNRGPQAENVVKL	ATGCAAACAGGAACTGTTAAATGGTTTAATGCAGAGAAAGGCTTCGGCTTTATCGAAGTTGAAGGCGGTAACGATGTATTCGTTCACTTCAGCGCGATTCAAGGCGACGGCTTCAAAACGTTGGACGAAGGTCAACGCGTAGAATTCAACATCGTTGAAGGAAACCGCGGACCACAAGCTGAAAACGTGGTAAAGCTGTAA
GCF_005577435.1_WP_138226292.1	MQQGTVKWFNADKGFGFIEVEGGDDVFVHFSAITGDGFKSLDEGQRVEFNVVQGNRGPQAENVVKL	ATGCAGCAAGGAACAGTAAAGTGGTTTAATGCAGACAAAGGTTTTGGTTTCATCGAGGTAGAAGGCGGAGACGACGTATTTGTGCACTTCAGTGCCATTACTGGCGACGGCTTCAAATCGCTTGACGAAGGTCAGCGTGTAGAATTTAATGTAGTACAAGGCAACCGCGGCCCACAAGCCGAGAACGTTGTTAAACTGTAA
GCF_005577435.1_WP_138226352.1	MKGTVKWFNAEKGYGFIQYEGGEDVFVHFSAIQGDGFKTLDEGQEVEFDITEGNRGPQAANVIKL	TTGAAAGGTACAGTTAAATGGTTTAACGCAGAAAAGGGTTACGGTTTTATTCAATACGAAGGTGGCGAGGACGTATTCGTACATTTCTCCGCTATTCAAGGCGACGGCTTCAAGACTCTTGACGAAGGTCAAGAAGTTGAATTCGACATCACTGAAGGTAACCGCGGTCCTCAAGCAGCTAACGTAATCAAGCTGTAA
GCF_005671395.1_WP_038627478.1	MSKIKGNVKWFNESKGFGFITPEDGSKDVFVHFSAIQSNGFKTLAEGQRVEFEITDGAKGPSAANVIAL	ATGTCTAAGATTAAAGGTAACGTTAAGTGGTTTAATGAATCCAAAGGATTCGGTTTCATTACTCCGGAAGATGGCAGCAAAGACGTGTTTGTACACTTCTCCGCTATCCAGAGCAACGGTTTCAAAACTCTGGCTGAAGGTCAGCGCGTAGAGTTCGAAATCACTGACGGTGCCAAAGGCCCTTCTGCCGCTAACGTAATCGCTCTGTAA
GCF_005671395.1_WP_138095941.1	MSDKITGIVKWFNPDKGFGFITPDNGSKDVFVHFSAIQSNEFRTLNEGQQVEFSIENGQKGPAAANVVPR	ATGTCTGATAAAATTACTGGTATCGTTAAATGGTTTAACCCGGACAAAGGGTTTGGTTTTATTACCCCGGATAACGGTAGCAAGGACGTATTCGTCCATTTCTCTGCTATTCAGAGCAACGAATTCCGTACTCTGAATGAAGGCCAGCAGGTTGAGTTCTCTATCGAGAACGGCCAGAAAGGCCCGGCCGCTGCTAACGTGGTGCCGCGTTGA
[truncated: 1,171 more rows]

## Sheet: (B)K-A type
Table S1B. Csps that were classified as K-A type
ID	Amino Acid	Nucleotide
[truncated: 402 more rows]

## Sheet: (C)K-E type
Table S1C. Csps that were classified as K-E type
ID	Amino Acid	Nucleotide
[truncated: 175 more rows]

## Sheet: (D)K4 type
Table S1D. Csps that were classified as K4 type
ID	Amino Acid	Nucleotide
[truncated: 847 more rows]

## Sheet: (E)KAorKE and K4
Table S1E. Csps that were classified as (KA or KE) and K4 type
ID	Amino Acid	Nucleotide
[truncated: 18 more rows]

## Sheet: (F)outside the identified types
Table S1F. Csps that were classified as outgroup
[truncated: 997 more rows]
