# Supplementary material
Source: HighWire-hosted journal article supplement (doi:10.1101/rna.080163.124)
Supplement: Supplemental_Table_S2.xlsx [file Supplemental_Table_S2.xlsx]

## Sheet: Table S2A strains and plasmids
Supplementary Table S2A. Bacterial strains and plasmid in this study
Strain/plasmid	Relevant genotype and property	Source/Reference
Strain
MG1655		Laboratory stock (Morita, et al., 2022)
RI1	NM1100 cspD-FLAG-cat	NM1100 + PCR product (primers 2328, 2329; template pSU313)
RI3	MG1655 cspD-FLAG-cat	MG1655 + P1(RI1)
RI7	MG1655 cspD-FLAG	RI1 + pCP20
TM772	W3110mlc D(sgrR-sgrS) Dhfq::cat	Morita, et al., 2015
Plasmid
pQE80L	High-copy-number plasmid vector	QIAGEN
pCspA-FLAG	Derivative of pQE80L carrying cspA-FLAG	This study (primers 2251, 2289; template chromosomal DNA of MG1655)
pCspD-FLAG	Derivative of pQE80L carrying cspD-FLAG	This study (primers 2152, 2291; template chromosomal DNA of MG1655)
pQE-CspA	Derivative of pQE80L carrying cspA	Morita, et al., 2022
pQE-CspD	Derivative of pQE80L carrying cspD	Morita, et al., 2022
pCspA13/D-FLAG	Derivative of pQE80L carrying cspA13/D-FLAG	This study (primers 2150, 2151, 2285, 2286; templates pCspA-FLAG, pCspD-FLAG)
pCspA34/D-FLAG	Derivative of pQE80L carrying cspA34/D-FLAG	This study (primers 2150, 2151, 2274, 2275; templates pCspA-FLAG, pCspD-FLAG)
pCspA39/D-FLAG	Derivative of pQE80L carrying cspA39/D-FLAG	This study (primers 2150, 2151, 2348, 2349; templates pCspA-FLAG, pCspD-FLAG)
pCspA49/D-FLAG	Derivative of pQE80L carrying cspA49/D-FLAG	This study (primers 2150, 2151, 2341, 2342; templates pCspA-FLAG, pCspD-FLAG)
pCspA61/D-FLAG	Derivative of pQE80L carrying cspA61/D-FLAG	This study (primers 2150, 2151, 2354, 2355; templates pCspA-FLAG, pCspD-FLAG)
pCspD58/A-FLAG	Derivative of pQE80L carrying cspD58/A-FLAG	This study (primers 2150, 2151, 2371, 2372; templates pCspA-FLAG, pCspD-FLAG)
pCspD46/A-FLAG	Derivative of pQE80L carrying cspD46/A-FLAG	This study (primers 2150, 2151, 2373, 2374; templates pCspA-FLAG, pCspD-FLAG)
pCspD36/A-FLAG	Derivative of pQE80L carrying cspD36/A-FLAG	This study (primers 2150, 2151, 2375, 2376; templates pCspA-FLAG, pCspD-FLAG)
pCspD-KS-FLAG	Derivative of pQE80L carrying cspD-KS-FLAG	This study (primers 2150, 2151, 2579, 2580; template pCspD-FLAG)
pCspD-DE-FLAG	Derivative of pQE80L carrying cspD-DE-FLAG	This study (primers 2150, 2151, 2377, 2378; template pCspD-FLAG)
pCspA-KA-FLAG	Derivative of pQE80L carrying cspA-KA-FLAG	This study (primers 2150, 2151, 2379, 2380; template pCspA-FLAG)
pSgrS-S-rplLT	Derivative of pAraX carrying sgrS-S-rplLT	Morita, et al., 2015
pCspA-K4A-FLAG	Derivative of pQE80L carrying cspA-K4A-FLAG	This study (primers 2347, 2151; template pCspA-FLAG)
pCspA13/D-K4A-FLAG	Derivative of pQE80L carrying cspA13/D-K4A-FLAG	This study (primers 2347, 2151; template pCspA13/D-FLAG)
pCspD-DA-FLAG	Derivative of pQE80L carrying cspD-DA-FLAG	This study (primers 2150, 2151, 2455, 2456; template pCspD-FLAG)
pCspD-KE-FLAG	Derivative of pQE80L carrying cspD-KE-FLAG	This study (primers 2150, 2151, 2453, 2454; template pCspD-FLAG)
pCspD-AA-FLAG	Derivative of pQE80L carrying cspD-AA-FLAG	This study (primers 2150, 2151, 2513, 2514; template pCspD-FLAG)
pCspD-FE-FLAG	Derivative of pQE80L carrying cspD-FE-FLAG	This study (primers 2150, 2151, 2567, 2568; template pCspD-FLAG)
pCspD-AE-FLAG	Derivative of pQE80L carrying cspD-AE-FLAG	This study (primers 2150, 2151, 2569, 2570; template pCspD-FLAG)
pCspD-TT-FLAG	Derivative of pQE80L carrying cspD-TT-FLAG	This study (primers 2150, 2151, 2571, 2572; template pCspD-FLAG)
pCspD-NE-FLAG	Derivative of pQE80L carrying cspD-NE-FLAG	This study (primers 2150, 2151, 2573, 2574; template pCspD-FLAG)
pCspD-IP-FLAG	Derivative of pQE80L carrying cspD-IP-FLAG	This study (primers 2150, 2151, 2575, 2576; template pCspD-FLAG)
pCspD-TE-FLAG	Derivative of pQE80L carrying cspD-TE-FLAG	This study (primers 2150, 2151, 2577, 2578; template pCspD-FLAG)
pCspB-FLAG	Derivative of pQE80L carrying cspB-FLAG	This study (primers 2253, 2292; template chromosomal DNA of MG1655)
pCspC-FLAG	Derivative of pQE80L carrying cspC-FLAG	This study (primers 2255, 2338; template chromosomal DNA of MG1655)
pCspE-FLAG	Derivative of pQE80L carrying cspE-FLAG	This study (primers 2157, 2339; template chromosomal DNA of MG1655)
pCspF-FLAG	Derivative of pQE80L carrying cspF-FLAG	This study (primers 2259, 2340; template chromosomal DNA of MG1655)
pCspG-FLAG	Derivative of pQE80L carrying cspG(mutEcoRI)-FLAG	This study (g118)
pCspH-FLAG	Derivative of pQE80L carrying cspH-FLAG	This study (primers 2263, 2293; template chromosomal DNA of MG1655)
pCspI-FLAG	Derivative of pQE80L carrying cspI-FLAG	This study (primers 2265, 2290; template chromosomal DNA of MG1655)
pEhCspD-FLAG	Derivative of pQE80L carrying EhcspD-FLAG	This study (g122)
pSeCspD-FLAG	Derivative of pQE80L carrying SecspD-FLAG	This study (g120)
pKpCspD-FLAG	Derivative of pQE80L carrying KpcspD-FLAG	This study (g126)
pVcCspD-FLAG	Derivative of pQE80L carrying VccspD-FLAG	This study (g121)
pPaCspD-FLAG	Derivative of pQE80L carrying PacspD-FLAG	This study (g119)
pPfCsp-FLAG	Derivative of pQE80L carrying Pfcsp-FLAG	This study (g125)
pNmCsp-FLAG	Derivative of pQE80L carrying Nmcsp-FLAG	This study (g124)
pSeCspD-DE-FLAG	Derivative of pQE80L carrying SecspD-DE-FLAG	This study (primers 2150, 2151, 2503, 2504; template pSeCspD-FLAG)
pVcCspD-DE-FLAG	Derivative of pQE80L carrying VccspD-DE-FLAG	This study (primers 2150, 2151, 2505, 2506; template pVcCspD-FLAG)
pCspD10/Pf-FLAG	Derivative of pQE80L carrying cspD10/Pf-FLAG	This study (primers 2150, 2151, 2468, 2469; templates pCspD-FLAG, PfpCsp-FLAG)
pCspD36/Pf-FLAG	Derivative of pQE80L carrying cspD36/Pf-FLAG	This study (primers 2150, 2151, 2466, 2467; templates pCspD-FLAG, PfpCsp-FLAG)
pCspD46/Pf-FLAG	Derivative of pQE80L carrying cspD46/Pf-FLAG	This study (primers 2150, 2151, 2509, 2510; templates pCspD-FLAG, PfpCsp-FLAG)
pPfCsp36/D-FLAG	Derivative of pQE80L carrying Pfcsp36/D-FLAG	This study (primers 2150, 2151, 2511, 2512; templates pCspD-FLAG, PfpCsp-FLAG)
pPfCsp46/D-FLAG	Derivative of pQE80L carrying Pfcsp46/D-FLAG	This study (primers 2150, 2151, 2470, 2471; templates pCspD-FLAG, PfpCsp-FLAG)
pPfCsp58/D-FLAG	Derivative of pQE80L carrying Pfcsp58/D-FLAG	This study (primers 2150, 2151, 2472, 2473; templates pCspD-FLAG, PfpCsp-FLAG)
pPfCsp-EcDLp-FLAG	Derivative of pQE80L carrying Pfcsp-EcDLp-FLAG	This study (primers 2150, 2151, 2509, 2510; templates pPfCsp36/D-FLAG, pCspD46/Pf-FLAG)
pCspD-PfLp-FLAG	Derivative of pQE80L carrying cspD-PfLp-FLAG	This study (primers 2150, 2151, 2470, 2471; templates pCspD36/Pf-FLAG, pPfCsp46/D-FLAG)
pPfCsp-A2E-FLAG	Derivative of pQE80L carrying Pfcsp-A2E-FLAG	This study (primers 2150, 2151, 2486, 2487; template PfpCsp-FLAG)

## Sheet: Table S2B oligos and gBlocks
Supplementary Table S2B. Oligonucleotides and gBlocks used for construction
Primer/gBlock	Sequence	Strain/Plasmid
Primer
2251	GGGAATTCATTAAAGAGGAGAAATTAACTATGTCCGGTAAAATGACTGG	pQE-CspA-FLAG (F)
2289	CCCCAAGCTTTTATTATTTATCGTCGTCATCTTTGTAGTCGCCCAGGCTGGTTACGTT	pQE-CspA-FLAG (R)
2152	GGGAATTCATTAAAGAGGAGAAATTAACTATGGAAAAGGGTACTGTTAAGTG	pQE-CspD-FLAG (F)
2291	CCCCAAGCTTCTATTATTTATCGTCGTCATCTTTGTAGTCGCCTGCGACTGCCGCTTC	pQE-CspD-FLAG (R)
2150	ATAGATTCAATTGTGAGCGG	pQE80L (F)
2151	CCAGATGGAGTTCTGAGGTC	pQE80L (R)
2285	GTAAAATGGTTCAACAATGCCAAAGGGTTT	pCspA13/D-FLAG (F)
2286	AAACCCTTTGGCATTGTTGAACCATTTTAC	pCspA13/D-FLAG (R)
2274	TTCGTACACTTCTCTACCATTCAGATGGAT	pCspA34/D-FLAG (F)
2275	ATCCATCTGAATGGTAGAGAAGTGTACGAA	pCspA34/D-FLAG (R)
2348	TCTGCTATCCAGAACGATGGTTACAGAACG	pCspA39/D-FLAG (F)
2349	CGTTCTGTAACCATCGTTCTGGATAGCAGA	pCspA39/D-FLAG (R)
2341	AAATCTCTGGACGAAGGACAATCCGTTCAG	pCspA49/D-FLAG (F)
2342	CTGAACGGATTGTCCTTCGTCCAGAGATTT	pCspA49/D-FLAG (R)
2354	AGCGGCGCTAAAGGCAATCACGCCAGTGTT	pCspA61/D-FLAG (F)
2355	AACACTGGCGTGATTGCCTTTAGCGCCGCT	pCspA61/D-FLAG (R)
2371	AGGGGCCAAAAGGCCCGGCAGCTGGTAA	pCspD58/A-FLAG (F)
2372	TTACCAGCTGCCGGGCCTTTTGGCCCCT	pCspD58/A-FLAG (R)
2373	TAAAAGCTGGACAAAAAGTGTCCTTCAC	pCspD46/A-FLAG (F)
2374	GTGAAGGACACTTTTTGTCCAGCTTTTA	pCspD46/A-FLAG (R)
2375	CCACCATTCAGATGGATGGTTACAAATC	pCspD36/A-FLAG (F)
2376	GATTTGTAACCATCCATCTGAATGGTGG	pCspD36/A-FLAG (R)
2579	ATGGATGGTTACAAATCTCTAAAAGCTGGA	pCspD-KS-FLAG (F)
2580	TCCAGCTTTTAGAGATTTGTAACCATCCAT	pCspD-KS-FLAG (R)
2377	GTTACAGAACGCTAGACGAAGGACAATCCGTTCA	pCspD-DE-FLAG (F)
2378	TGAACGGATTGTCCTTCGTCTAGCGTTCTGTAAC	pCspD-DE-FLAG (R)
2379	GTTACAAATCTCTGAAAGCTGGTCAGAAAGTGTC	pCspA-KA-FLAG (F)
2380	GACACTTTCTGACCAGCTTTCAGAGATTTGTAAC	pCspA-KA-FLAG (R)
2347	GGGAATTCATTAAAGAGGAGAAATTAACTATGTCCGGTGCAATGACTGG	pCspA-K4A-FLAG, pCspA13/D-K4A-FLAG (F)
2455	TACAGAACGCTAGACGCTGGACAATCCGTT	pCspD-DA-FLAG (F)
2456	AACGGATTGTCCAGCGTCTAGCGTTCTGTA	pCspD-DA-FLAG (R)
2453	TACAGAACGCTAAAAGAAGGACAATCCGTT	pCspD-KE-FLAG (F)
2454	AACGGATTGTCCTTCTTTTAGCGTTCTGTA	pCspD-KE-FLAG (R)
2513	ACAGAACGCTAGCTGCTGGACAATCCGT	pCspD-AA-FLAG (F)
2514	ACGGATTGTCCAGCAGCTAGCGTTCTGT	pCspD-AA-FLAG (R)
2567	TACAGAACGCTATTTGAAGGACAATCCGTT	pCspD-FE-FLAG (F)
2568	AACGGATTGTCCTTCAAATAGCGTTCTGTA	pCspD-FE-FLAG (R)
2569	TACAGAACGCTAGCTGAAGGACAATCCGTT	pCspD-AE-FLAG (F)
2570	AACGGATTGTCCTTCAGCTAGCGTTCTGTA	pCspD-AE-FLAG (R)
2571	TACAGAACGCTAACCACCGGACAATCCGTT	pCspD-TT-FLAG (F)
2572	AACGGATTGTCCGGTGGTTAGCGTTCTGTA	pCspD-TT-FLAG (R)
2573	TACAGAACGCTAAATGAGGGACAATCCGTT	pCspD-NE-FLAG (F)
2574	AACGGATTGTCCCTCATTTAGCGTTCTGTA	pCspD-NE-FLAG (R)
2575	TACAGAACGCTAATACCAGGACAATCCGTT	pCspD-IP-FLAG (F)
2576	AACGGATTGTCCTGGTATTAGCGTTCTGTA	pCspD-IP-FLAG (R)
2577	TACAGAACGCTAACTGAGGGACAATCCGTT	pCspD-TE-FLAG (F)
2578	AACGGATTGTCCCTCAGTTAGCGTTCTGTA	pCspD-TE-FLAG (R)
2253	GGGAATTCATTAAAGAGGAGAAATTAACTATGTCAAATAAAATGACTGG	pQE-CspB-FLAG (F)
2292	CCCCAAGCTTTTATTATTTATCGTCGTCATCTTTGTAGTCGCCATCAGTAATGATGAC	pQE-CspB-FLAG (R)
2255	GGGAATTCATTAAAGAGGAGAAATTAACTATGGCAAAGATTAAAGGTCA	pQE-CspC-FLAG (F)
2338	CCCCAAGCTTTTATTATTTATCGTCGTCATCTTTGTAGTCGCCGATAGCTGTTACGTTAAC	pQE-CspC-FLAG (R)
2257	GGGAATTCATTAAAGAGGAGAAATTAACTATGTCTAAGATTAAAGGTAA	pQE-CspE-FLAG (F)
2339	CCCCAAGCTTTTATTATTTATCGTCGTCATCTTTGTAGTCGCCCAGAGCGATTACGTTTGC	pQE-CspE-FLAG (R)
2259	GGGAATTCATTAAAGAGGAGAAATTAACTATGTCCCGTAAAATGACAGG	pQE-CspF-FLAG (F)
2340	CCCCAAGCTTTTATTATTTATCGTCGTCATCTTTGTAGTCGCCTGAAAGGTAAACATTGGC	pQE-CspF-FLAG (R)
2263	GGGAATTCATTAAAGAGGAGAAATTAACTATGTCCCGTAAAATGACAGG	pQE-CspH-FLAG (F)
2293	CCCCAAGCTTTTATTATTTATCGTCGTCATCTTTGTAGTCGCCAGAGAGATAAACATT	pQE-CspH-FLAG (R)
2265	GGGAATTCATTAAAGAGGAGAAATTAACTATGTCTAACAAAATGACTGG	pQE-CspI-FLAG (F)
2290	CCCCAAGCTTTCATTATTTATCGTCGTCATCTTTGTAGTCGCCAAGCGCCACTACATG	pQE-CspI-FLAG (R)
2503	ACAGAACGCTTGACGAAGGACAGTCTGT	pSeCspD-DE-FLAG (F)
2504	ACAGACTGTCCTTCGTCAAGCGTTCTGT	pSeCspD-DE-FLAG (R)
2505	ACCGTACACTCGACGAAGGTCAACAGGT	pVcCspD-DE-FLAG (F)
2506	ACCTGTTGACCTTCGTCGAGTGTACGGT	pVcCspD-DE-FLAG (R)
2468	AAGTGGTTCAACGACGCAAAAGGT	pCspD10/Pf-FLAG (F)
2469	ACCTTTTGCGTCGTTGAACCACTT	pCspD10/Pf-FLAG (R)
2466	ACCATTCAGATGAATGGGTTCAAG	pCspD36/Pf-FLAG (F)
2467	CTTGAACCCATTCATCTGAATGGT	pCspD36/Pf-FLAG (R)
2509	AAAGCTGGACAAAAAGTAACCTTC	pCspD46/Pf-FLAG (F), pPfCsp-EcDLp-FLAG (F)
2510	GAAGGTTACTTTTTGTCCAGCTTT	pCspD46/Pf-FLAG (R), pPfCsp-EcDLp-FLAG (R)
2511	GCCATCCAGATGGATGGTTACAGA	pPfCsp36/D-FLAG (F)
2512	TCTGTAACCATCCATCTGGATGGC	pPfCsp36/D-FLAG (R)
2470	AAGGAAGGTCAATCCGTTCAGTTT	pPfCsp46/D-FLAG (F), pCspD-PfLp-FLAG (F)
2471	AAACTGAACGGATTGACCTTCCTT	pPfCsp46/D-FLAG (R), pCspD-PfLp-FLAG (R)
2472	GGCCCGAAAGGCAATCACGCCAGT	pPfCsp58/D-FLAG (F)
2473	ACTGGCGTGATTGCCTTTCGGGCC	pPfCsp58/D-FLAG (R)
2486	AATTAACTATGGAAACTGGTACGGT	pPfCsp-A2E-FLAG (F)
2457	ACCGTACCAGTTTCCATAGTTAATT	pPfCsp-A2E-FLAG (R)
2328	TTATTGTGCCCGTCGAAGTAGAAGCGGCAGTCGCAGACTACAAAGATGACGA	cspD-FLAG-cat (F)
2329	GGCATTTTGCCTTTAGGATGTACACAATGAGACAGATATGAATATCCTCCTTAG	cspD-FLAG-cat (R)
gBlock
g118	CCCGGGGAATTCATTAAAGAGGAGAAATTAACTATGTCTAATAAAATGACTGGTTTAGTAAAATGGTTTAACGCAGATAAAGGTTTTGGCTTTATCACTCCTGATGATGGCAGCAAAGACGTTTTCGTCCATTTCACCGCCATCCAGAGCAATGAGTTCCGCACGCTGAACGAAAATCAGAAAGTTGAATTTTCTATTGAGCAGGGGCAACGTGGCCCCGCGGCAGCGAACGTTGTTACGCTCGGCGACTACAAAGATGACGACGATAAATAATAGAAGCTTGGG	pQE-CspG-FLAG
g126	GGGGAATTCATTAAAGAGGAGAAATTAACTATGGAAATGGGTACTGTTAAGTGGTTCAACAATGCCAAAGGGTTCGGTTTTATCTGCCCTGAGGGCGGCGGCGAAGACATTTTCGCCCATTACTCCACCATCCAGATGGATGGTTACAGAACGCTAAAAGCCGGACAAGCCGTTCGGTTTGATGTTCACCAGGGGCCAAAAGGCAATCACGCCAGCGTGATCGTCCCTGTGGAAGCGGAAACGGCTGCAGGCGACTACAAAGATGACGACGATAAATAATAGAAGCTTGGG	pKpCspD-FLAG
g122	GGGGAATTCATTAAAGAGGAGAAATTAACTATGGAAATGGGTACTGTTAAGTGGTTCAACAACGCCAAAGGGTTTGGCTTCATCTGCCCTGAAGGCGGCGGCGAGGATATCTTCGCTCACTATTCCACCATTCAGATGGATGGTTACAGGACGCTCAAAGCCGGGCAATCCGTCCGGTTCGATGTACACCAGGGGCCAAAAGGCAATCACGCCAGTCTAATCGTCCCCGTTGAAGCAGAAGCGGTTGCAGGCGACTACAAAGATGACGACGATAAATAATAGAAGCTTGGG	pEhCspD-FLAG
g120	GGGGAATTCATTAAAGAGGAGAAATTAACTATGGAAACGGGTACTGTAAAGTGGTTCAACAATGCCAAAGGGTTTGGTTTCATCTGCCCTGAAGGCGGCGGCGAGGATATTTTCGCCCATTATTCCACCATTCAAATGGATGGTTACAGAACGCTTAAAGCCGGACAGTCTGTCCGGTTTGATGTCCACCAGGGGCCAAAAGGCAATCACGCCAGCGTCATCGTGCCCATCGAAGCAGAGGCCGTTGCAGGCGACTACAAAGATGACGACGATAAATAATAGAAGCTTGGG	pSeCspD-FLAG
g121	GGGGAATTCATTAAAGAGGAGAAATTAACTATGGCTACAGGTACAGTGAAATGGTTTAATAATGCCAAAGGCTTCGGTTTTATTTGCCCGGAAGGTGAAGACGGAGATATTTTCGCTCATTACTCAACCATTCAGATGGACGGATACCGTACACTCAAAGCCGGTCAACAGGTTTCTTATCAGGTGGAGCAAGGTCCTAAGGGATACCACGCGAGCTGTGTTGTGCCAATCGAGGGACAATCAGCAAAAGGCGACTACAAAGATGACGACGATAAATAATAGAAGCTTGGG	pVcCspD-FLAG
g119	GGGGAATTCATTAAAGAGGAGAAATTAACTATGCTCAGCGGTAAGGTCAAGTGGTTCAACAACGCCAAGGGCTACGGGTTCATCCTGGCCGAGGGCCGAGATGAGGACCTGTTCGCCCATTACTCGGCCATTCAGATGGACGGTTACAAGACACTCAAGGCGGGCCAGCCGGTCAATTTCGAGATCATCCAGGGACCGAAGGGACTGCATGCCATCAACATCAGCCCCGCCACCGCGACAACCGCCGCACCCTCCGCCCCCGCCCCGCAGGAAGAGCCGCAGGCGACGCCCATCGAAGCCGGCGACTACAAAGATGACGACGATAAATAATAGAAGCTTGGG	pPaCspD-FLAG
g125	GGGGAATTCATTAAAGAGGAGAAATTAACTATGGCAACTGGTACGGTCAAATGGTTCAATGACGCAAAAGGTTTCGGATTCATCACGCCTGACGAAGGTGGTGAGGATCTGTTTGCACACTTCTCGGCCATCCAGATGAATGGGTTCAAGACCCTCAAGGAAGGTCAAAAAGTAACCTTCGAGGTCGTGCAAGGCCCGAAAGGCAAACAGGCATCGAACATCCAGGCACCTGCCGGCGACTACAAAGATGACGACGATAAATAATAGAAGCTTGGG	pPfCsp-FLAG
g124	GGGGAATTCATTAAAGAGGAGAAATTAACTATGGCAACCGGTATCGTAAAATGGTTTAACGACGCTAAAGGTTTTGGTTTCATCACTCCTGATGAAGGCGGCGAAGATTTGTTCGCTCACTTCTCAGCAATCAATATGGAAGGTTTCAAAACCCTGAAAGAAGGCCAACGCGTCTCTTTCGACGTAACCACCGGCCCTAAAGGCAAACAGGCCGCCAACATTCAGGCTGCTGGCGACTACAAAGATGACGACGATAAATAATAGAAGCTTGGG	pNmCsp-FLAG
